# Supplementary material
Source: ML conference proceedings conference paper supplement (https://proceedings.neurips.cc/paper_files/paper/2022/hash/11332b6b6cf4485b84afadb1352d3a9a-Abstract.html)
Supplement: Supplementary file 1 [file 11332b6b6cf4485b84afadb1352d3a9a-Supplemental-Conference.zip]

Archive with 517 entries (413 files):
- ScienceQA_Supplementary_Material/
- __MACOSX/._ScienceQA_Supplementary_Material
- ScienceQA_Supplementary_Material/ScienceQA_Supplementary.pdf
- __MACOSX/ScienceQA_Supplementary_Material/._ScienceQA_Supplementary.pdf
- ScienceQA_Supplementary_Material/explore/
- ScienceQA_Supplementary_Material/explore/visualizer.html
- __MACOSX/ScienceQA_Supplementary_Material/explore/._visualizer.html
- ScienceQA_Supplementary_Material/explore/data_examples/
- __MACOSX/ScienceQA_Supplementary_Material/explore/._data_examples
- ScienceQA_Supplementary_Material/explore/pages/
- __MACOSX/ScienceQA_Supplementary_Material/explore/._pages
- ScienceQA_Supplementary_Material/explore/data_examples/66/
- __MACOSX/ScienceQA_Supplementary_Material/explore/data_examples/._66
- ScienceQA_Supplementary_Material/explore/data_examples/309/
- __MACOSX/ScienceQA_Supplementary_Material/explore/data_examples/._309
- ScienceQA_Supplementary_Material/explore/data_examples/50/
- __MACOSX/ScienceQA_Supplementary_Material/explore/data_examples/._50
- ScienceQA_Supplementary_Material/explore/data_examples/150/
- __MACOSX/ScienceQA_Supplementary_Material/explore/data_examples/._150
- ScienceQA_Supplementary_Material/explore/data_examples/502/
- __MACOSX/ScienceQA_Supplementary_Material/explore/data_examples/._502
- ScienceQA_Supplementary_Material/explore/data_examples/67/
- __MACOSX/ScienceQA_Supplementary_Material/explore/data_examples/._67
- ScienceQA_Supplementary_Material/explore/data_examples/60/
- __MACOSX/ScienceQA_Supplementary_Material/explore/data_examples/._60
- ScienceQA_Supplementary_Material/explore/data_examples/399/
- __MACOSX/ScienceQA_Supplementary_Material/explore/data_examples/._399
- ScienceQA_Supplementary_Material/explore/data_examples/160/
- __MACOSX/ScienceQA_Supplementary_Material/explore/data_examples/._160
- ScienceQA_Supplementary_Material/explore/data_examples/169/
- __MACOSX/ScienceQA_Supplementary_Material/explore/data_examples/._169
- ScienceQA_Supplementary_Material/explore/data_examples/227/
- __MACOSX/ScienceQA_Supplementary_Material/explore/data_examples/._227
- ScienceQA_Supplementary_Material/explore/data_examples/449/
- __MACOSX/ScienceQA_Supplementary_Material/explore/data_examples/._449
- ScienceQA_Supplementary_Material/explore/data_examples/422/
- __MACOSX/ScienceQA_Supplementary_Material/explore/data_examples/._422
- ScienceQA_Supplementary_Material/explore/data_examples/274/
- __MACOSX/ScienceQA_Supplementary_Material/explore/data_examples/._274
- ScienceQA_Supplementary_Material/explore/data_examples/273/
- __MACOSX/ScienceQA_Supplementary_Material/explore/data_examples/._273
- ScienceQA_Supplementary_Material/explore/data_examples/221/
- __MACOSX/ScienceQA_Supplementary_Material/explore/data_examples/._221
- ScienceQA_Supplementary_Material/explore/data_examples/483/
- __MACOSX/ScienceQA_Supplementary_Material/explore/data_examples/._483
- ScienceQA_Supplementary_Material/explore/data_examples/281/
- __MACOSX/ScienceQA_Supplementary_Material/explore/data_examples/._281
- ScienceQA_Supplementary_Material/explore/data_examples/257/
- __MACOSX/ScienceQA_Supplementary_Material/explore/data_examples/._257
- ScienceQA_Supplementary_Material/explore/data_examples/497/
- __MACOSX/ScienceQA_Supplementary_Material/explore/data_examples/._497
- ScienceQA_Supplementary_Material/explore/data_examples/455/
- __MACOSX/ScienceQA_Supplementary_Material/explore/data_examples/._455
- ScienceQA_Supplementary_Material/explore/data_examples/431/
- __MACOSX/ScienceQA_Supplementary_Material/explore/data_examples/._431
- ScienceQA_Supplementary_Material/explore/data_examples/258/
- __MACOSX/ScienceQA_Supplementary_Material/explore/data_examples/._258
- ScienceQA_Supplementary_Material/explore/data_examples/256/
- __MACOSX/ScienceQA_Supplementary_Material/explore/data_examples/._256
- ScienceQA_Supplementary_Material/explore/data_examples/18/
- __MACOSX/ScienceQA_Supplementary_Material/explore/data_examples/._18
- ScienceQA_Supplementary_Material/explore/data_examples/173/
- __MACOSX/ScienceQA_Supplementary_Material/explore/data_examples/._173
- ScienceQA_Supplementary_Material/explore/data_examples/384/
- __MACOSX/ScienceQA_Supplementary_Material/explore/data_examples/._384
- ScienceQA_Supplementary_Material/explore/data_examples/7/
- __MACOSX/ScienceQA_Supplementary_Material/explore/data_examples/._7
- ScienceQA_Supplementary_Material/explore/data_examples/16/
- __MACOSX/ScienceQA_Supplementary_Material/explore/data_examples/._16
- ScienceQA_Supplementary_Material/explore/data_examples/89/
- __MACOSX/ScienceQA_Supplementary_Material/explore/data_examples/._89
- ScienceQA_Supplementary_Material/explore/data_examples/45/
- __MACOSX/ScienceQA_Supplementary_Material/explore/data_examples/._45
- ScienceQA_Supplementary_Material/explore/data_examples/323/
- __MACOSX/ScienceQA_Supplementary_Material/explore/data_examples/._323
- ScienceQA_Supplementary_Material/explore/data_examples/118/
- __MACOSX/ScienceQA_Supplementary_Material/explore/data_examples/._118
- ScienceQA_Supplementary_Material/explore/data_examples/127/
- __MACOSX/ScienceQA_Supplementary_Material/explore/data_examples/._127
- ScienceQA_Supplementary_Material/explore/data_examples/74/
- __MACOSX/ScienceQA_Supplementary_Material/explore/data_examples/._74
- ScienceQA_Supplementary_Material/explore/data_examples/6/
- __MACOSX/ScienceQA_Supplementary_Material/explore/data_examples/._6
- ScienceQA_Supplementary_Material/explore/data_examples/28/
- __MACOSX/ScienceQA_Supplementary_Material/explore/data_examples/._28
- ScienceQA_Supplementary_Material/explore/data_examples/371/
- __MACOSX/ScienceQA_Supplementary_Material/explore/data_examples/._371
- ScienceQA_Supplementary_Material/explore/data_examples/376/
- __MACOSX/ScienceQA_Supplementary_Material/explore/data_examples/._376
- ScienceQA_Supplementary_Material/explore/data_examples/340/
- __MACOSX/ScienceQA_Supplementary_Material/explore/data_examples/._340
- ScienceQA_Supplementary_Material/explore/data_examples/8/
- __MACOSX/ScienceQA_Supplementary_Material/explore/data_examples/._8
- ScienceQA_Supplementary_Material/explore/data_examples/81/
- __MACOSX/ScienceQA_Supplementary_Material/explore/data_examples/._81
- ScienceQA_Supplementary_Material/explore/data_examples/72/
- __MACOSX/ScienceQA_Supplementary_Material/explore/data_examples/._72
- ScienceQA_Supplementary_Material/explore/data_examples/361/
- __MACOSX/ScienceQA_Supplementary_Material/explore/data_examples/._361
- ScienceQA_Supplementary_Material/explore/data_examples/153/
- __MACOSX/ScienceQA_Supplementary_Material/explore/data_examples/._153
- ScienceQA_Supplementary_Material/explore/data_examples/36/
- __MACOSX/ScienceQA_Supplementary_Material/explore/data_examples/._36
- ScienceQA_Supplementary_Material/explore/data_examples/357/
- __MACOSX/ScienceQA_Supplementary_Material/explore/data_examples/._357
- ScienceQA_Supplementary_Material/explore/data_examples/165/
- __MACOSX/ScienceQA_Supplementary_Material/explore/data_examples/._165
- ScienceQA_Supplementary_Material/explore/data_examples/164/
- __MACOSX/ScienceQA_Supplementary_Material/explore/data_examples/._164
- ScienceQA_Supplementary_Material/explore/data_examples/356/
- __MACOSX/ScienceQA_Supplementary_Material/explore/data_examples/._356
- ScienceQA_Supplementary_Material/explore/data_examples/358/
- __MACOSX/ScienceQA_Supplementary_Material/explore/data_examples/._358
- ScienceQA_Supplementary_Material/explore/data_examples/367/
- __MACOSX/ScienceQA_Supplementary_Material/explore/data_examples/._367
- ScienceQA_Supplementary_Material/explore/data_examples/393/
- __MACOSX/ScienceQA_Supplementary_Material/explore/data_examples/._393
- ScienceQA_Supplementary_Material/explore/data_examples/394/
- __MACOSX/ScienceQA_Supplementary_Material/explore/data_examples/._394
- ScienceQA_Supplementary_Material/explore/data_examples/360/
- __MACOSX/ScienceQA_Supplementary_Material/explore/data_examples/._360
- ScienceQA_Supplementary_Material/explore/data_examples/106/
- __MACOSX/ScienceQA_Supplementary_Material/explore/data_examples/._106
- ScienceQA_Supplementary_Material/explore/data_examples/52/
- __MACOSX/ScienceQA_Supplementary_Material/explore/data_examples/._52
- ScienceQA_Supplementary_Material/explore/data_examples/101/
- __MACOSX/ScienceQA_Supplementary_Material/explore/data_examples/._101
- ScienceQA_Supplementary_Material/explore/data_examples/55/
- __MACOSX/ScienceQA_Supplementary_Material/explore/data_examples/._55
- ScienceQA_Supplementary_Material/explore/data_examples/302/
- __MACOSX/ScienceQA_Supplementary_Material/explore/data_examples/._302
- ScienceQA_Supplementary_Material/explore/data_examples/426/
- __MACOSX/ScienceQA_Supplementary_Material/explore/data_examples/._426
- ScienceQA_Supplementary_Material/explore/data_examples/284/
- __MACOSX/ScienceQA_Supplementary_Material/explore/data_examples/._284
- ScienceQA_Supplementary_Material/explore/data_examples/421/
- __MACOSX/ScienceQA_Supplementary_Material/explore/data_examples/._421
- ScienceQA_Supplementary_Material/explore/data_examples/241/
- __MACOSX/ScienceQA_Supplementary_Material/explore/data_examples/._241
- ScienceQA_Supplementary_Material/explore/data_examples/481/
- __MACOSX/ScienceQA_Supplementary_Material/explore/data_examples/._481
- ScienceQA_Supplementary_Material/explore/data_examples/475/
- __MACOSX/ScienceQA_Supplementary_Material/explore/data_examples/._475
- ScienceQA_Supplementary_Material/explore/data_examples/472/
- __MACOSX/ScienceQA_Supplementary_Material/explore/data_examples/._472
- ScienceQA_Supplementary_Material/explore/data_examples/486/
- __MACOSX/ScienceQA_Supplementary_Material/explore/data_examples/._486
- ScienceQA_Supplementary_Material/explore/data_examples/278/
- __MACOSX/ScienceQA_Supplementary_Material/explore/data_examples/._278
- ScienceQA_Supplementary_Material/explore/data_examples/247/
- __MACOSX/ScienceQA_Supplementary_Material/explore/data_examples/._247
- ScienceQA_Supplementary_Material/explore/data_examples/240/
- __MACOSX/ScienceQA_Supplementary_Material/explore/data_examples/._240
- ScienceQA_Supplementary_Material/explore/data_examples/416/
- __MACOSX/ScienceQA_Supplementary_Material/explore/data_examples/._416
- ScienceQA_Supplementary_Material/explore/data_examples/249/
- __MACOSX/ScienceQA_Supplementary_Material/explore/data_examples/._249
- ScienceQA_Supplementary_Material/explore/data_examples/420/
- __MACOSX/ScienceQA_Supplementary_Material/explore/data_examples/._420
- ScienceQA_Supplementary_Material/explore/data_examples/418/
- __MACOSX/ScienceQA_Supplementary_Material/explore/data_examples/._418
- ScienceQA_Supplementary_Material/explore/data_examples/213/
- __MACOSX/ScienceQA_Supplementary_Material/explore/data_examples/._213
- ScienceQA_Supplementary_Material/explore/data_examples/231/
- __MACOSX/ScienceQA_Supplementary_Material/explore/data_examples/._231
- ScienceQA_Supplementary_Material/explore/data_examples/467/
- __MACOSX/ScienceQA_Supplementary_Material/explore/data_examples/._467
- ScienceQA_Supplementary_Material/explore/data_examples/254/
- __MACOSX/ScienceQA_Supplementary_Material/explore/data_examples/._254
- ScienceQA_Supplementary_Material/explore/data_examples/262/
- __MACOSX/ScienceQA_Supplementary_Material/explore/data_examples/._262
- ScienceQA_Supplementary_Material/explore/data_examples/265/
- __MACOSX/ScienceQA_Supplementary_Material/explore/data_examples/._265
- ScienceQA_Supplementary_Material/explore/data_examples/206/
- __MACOSX/ScienceQA_Supplementary_Material/explore/data_examples/._206
- ScienceQA_Supplementary_Material/explore/data_examples/290/
- __MACOSX/ScienceQA_Supplementary_Material/explore/data_examples/._290
- ScienceQA_Supplementary_Material/explore/data_examples/263/
- __MACOSX/ScienceQA_Supplementary_Material/explore/data_examples/._263
- ScienceQA_Supplementary_Material/explore/data_examples/299/
- __MACOSX/ScienceQA_Supplementary_Material/explore/data_examples/._299
- ScienceQA_Supplementary_Material/explore/data_examples/79/
- __MACOSX/ScienceQA_Supplementary_Material/explore/data_examples/._79
- ScienceQA_Supplementary_Material/explore/data_examples/77/
- __MACOSX/ScienceQA_Supplementary_Material/explore/data_examples/._77
- ScienceQA_Supplementary_Material/explore/data_examples/124/
- __MACOSX/ScienceQA_Supplementary_Material/explore/data_examples/._124
- ScienceQA_Supplementary_Material/explore/data_examples/148/
- __MACOSX/ScienceQA_Supplementary_Material/explore/data_examples/._148
- ScienceQA_Supplementary_Material/explore/data_examples/71/
- __MACOSX/ScienceQA_Supplementary_Material/explore/data_examples/._71
- ScienceQA_Supplementary_Material/explore/data_examples/317/
- __MACOSX/ScienceQA_Supplementary_Material/explore/data_examples/._317
- ScienceQA_Supplementary_Material/explore/data_examples/82/
- __MACOSX/ScienceQA_Supplementary_Material/explore/data_examples/._82
- ScienceQA_Supplementary_Material/explore/data_examples/122/
- __MACOSX/ScienceQA_Supplementary_Material/explore/data_examples/._122
- ScienceQA_Supplementary_Material/explore/data_examples/326/
- __MACOSX/ScienceQA_Supplementary_Material/explore/data_examples/._326
- ScienceQA_Supplementary_Material/explore/data_examples/113/
- __MACOSX/ScienceQA_Supplementary_Material/explore/data_examples/._113
- ScienceQA_Supplementary_Material/explore/data_examples/147/
- __MACOSX/ScienceQA_Supplementary_Material/explore/data_examples/._147
- ScienceQA_Supplementary_Material/explore/data_examples/178/
- __MACOSX/ScienceQA_Supplementary_Material/explore/data_examples/._178
- ScienceQA_Supplementary_Material/explore/data_examples/13/
- __MACOSX/ScienceQA_Supplementary_Material/explore/data_examples/._13
- ScienceQA_Supplementary_Material/explore/data_examples/14/
- __MACOSX/ScienceQA_Supplementary_Material/explore/data_examples/._14
- ScienceQA_Supplementary_Material/explore/data_examples/343/
- __MACOSX/ScienceQA_Supplementary_Material/explore/data_examples/._343
- ScienceQA_Supplementary_Material/explore/pages/visualizer.css
- __MACOSX/ScienceQA_Supplementary_Material/explore/pages/._visualizer.css
- ScienceQA_Supplementary_Material/explore/pages/visualizer.js
- __MACOSX/ScienceQA_Supplementary_Material/explore/pages/._visualizer.js
- ScienceQA_Supplementary_Material/explore/pages/problems.js
- __MACOSX/ScienceQA_Supplementary_Material/explore/pages/._problems.js
- ScienceQA_Supplementary_Material/explore/data_examples/66/data.json
- __MACOSX/ScienceQA_Supplementary_Material/explore/data_examples/66/._data.json
- ScienceQA_Supplementary_Material/explore/data_examples/309/data.json
- __MACOSX/ScienceQA_Supplementary_Material/explore/data_examples/309/._data.json
- ScienceQA_Supplementary_Material/explore/data_examples/309/image.png
- __MACOSX/ScienceQA_Supplementary_Material/explore/data_examples/309/._image.png
- ScienceQA_Supplementary_Material/explore/data_examples/50/data.json
- __MACOSX/ScienceQA_Supplementary_Material/explore/data_examples/50/._data.json
- ScienceQA_Supplementary_Material/explore/data_examples/150/data.json
- __MACOSX/ScienceQA_Supplementary_Material/explore/data_examples/150/._data.json
- ScienceQA_Supplementary_Material/explore/data_examples/150/image.png
- __MACOSX/ScienceQA_Supplementary_Material/explore/data_examples/150/._image.png
- ScienceQA_Supplementary_Material/explore/data_examples/502/data.json
- __MACOSX/ScienceQA_Supplementary_Material/explore/data_examples/502/._data.json
- ScienceQA_Supplementary_Material/explore/data_examples/67/data.json
- __MACOSX/ScienceQA_Supplementary_Material/explore/data_examples/67/._data.json
- ScienceQA_Supplementary_Material/explore/data_examples/60/data.json
- __MACOSX/ScienceQA_Supplementary_Material/explore/data_examples/60/._data.json
- ScienceQA_Supplementary_Material/explore/data_examples/60/image.png
- __MACOSX/ScienceQA_Supplementary_Material/explore/data_examples/60/._image.png
- ScienceQA_Supplementary_Material/explore/data_examples/399/data.json
- __MACOSX/ScienceQA_Supplementary_Material/explore/data_examples/399/._data.json
- ScienceQA_Supplementary_Material/explore/data_examples/399/image.png
- __MACOSX/ScienceQA_Supplementary_Material/explore/data_examples/399/._image.png
- ScienceQA_Supplementary_Material/explore/data_examples/160/data.json
- __MACOSX/ScienceQA_Supplementary_Material/explore/data_examples/160/._data.json
- ScienceQA_Supplementary_Material/explore/data_examples/160/image.png
- __MACOSX/ScienceQA_Supplementary_Material/explore/data_examples/160/._image.png
- ScienceQA_Supplementary_Material/explore/data_examples/169/data.json
- __MACOSX/ScienceQA_Supplementary_Material/explore/data_examples/169/._data.json
- ScienceQA_Supplementary_Material/explore/data_examples/227/data.json
- __MACOSX/ScienceQA_Supplementary_Material/explore/data_examples/227/._data.json
- ScienceQA_Supplementary_Material/explore/data_examples/449/data.json
- __MACOSX/ScienceQA_Supplementary_Material/explore/data_examples/449/._data.json
- ScienceQA_Supplementary_Material/explore/data_examples/449/image.png
- __MACOSX/ScienceQA_Supplementary_Material/explore/data_examples/449/._image.png
- ScienceQA_Supplementary_Material/explore/data_examples/422/data.json
- __MACOSX/ScienceQA_Supplementary_Material/explore/data_examples/422/._data.json
- ScienceQA_Supplementary_Material/explore/data_examples/422/image.png
- __MACOSX/ScienceQA_Supplementary_Material/explore/data_examples/422/._image.png
- ScienceQA_Supplementary_Material/explore/data_examples/274/data.json
- __MACOSX/ScienceQA_Supplementary_Material/explore/data_examples/274/._data.json
- ScienceQA_Supplementary_Material/explore/data_examples/273/data.json
- __MACOSX/ScienceQA_Supplementary_Material/explore/data_examples/273/._data.json
- ScienceQA_Supplementary_Material/explore/data_examples/273/image.png
- __MACOSX/ScienceQA_Supplementary_Material/explore/data_examples/273/._image.png
- ScienceQA_Supplementary_Material/explore/data_examples/221/data.json
- __MACOSX/ScienceQA_Supplementary_Material/explore/data_examples/221/._data.json
- ScienceQA_Supplementary_Material/explore/data_examples/483/data.json
- __MACOSX/ScienceQA_Supplementary_Material/explore/data_examples/483/._data.json
- ScienceQA_Supplementary_Material/explore/data_examples/281/data.json
- __MACOSX/ScienceQA_Supplementary_Material/explore/data_examples/281/._data.json
- ScienceQA_Supplementary_Material/explore/data_examples/257/data.json
- __MACOSX/ScienceQA_Supplementary_Material/explore/data_examples/257/._data.json
- ScienceQA_Supplementary_Material/explore/data_examples/257/image.png
- __MACOSX/ScienceQA_Supplementary_Material/explore/data_examples/257/._image.png
- ScienceQA_Supplementary_Material/explore/data_examples/497/data.json
- __MACOSX/ScienceQA_Supplementary_Material/explore/data_examples/497/._data.json
- ScienceQA_Supplementary_Material/explore/data_examples/497/image.png
- __MACOSX/ScienceQA_Supplementary_Material/explore/data_examples/497/._image.png
- ScienceQA_Supplementary_Material/explore/data_examples/455/data.json
- __MACOSX/ScienceQA_Supplementary_Material/explore/data_examples/455/._data.json
- ScienceQA_Supplementary_Material/explore/data_examples/431/data.json
- __MACOSX/ScienceQA_Supplementary_Material/explore/data_examples/431/._data.json
- ScienceQA_Supplementary_Material/explore/data_examples/258/data.json
- __MACOSX/ScienceQA_Supplementary_Material/explore/data_examples/258/._data.json
- ScienceQA_Supplementary_Material/explore/data_examples/258/image.png
- __MACOSX/ScienceQA_Supplementary_Material/explore/data_examples/258/._image.png
- ScienceQA_Supplementary_Material/explore/data_examples/256/data.json
- __MACOSX/ScienceQA_Supplementary_Material/explore/data_examples/256/._data.json
- ScienceQA_Supplementary_Material/explore/data_examples/18/data.json
- __MACOSX/ScienceQA_Supplementary_Material/explore/data_examples/18/._data.json
- ScienceQA_Supplementary_Material/explore/data_examples/173/data.json
- __MACOSX/ScienceQA_Supplementary_Material/explore/data_examples/173/._data.json
- ScienceQA_Supplementary_Material/explore/data_examples/384/data.json
- __MACOSX/ScienceQA_Supplementary_Material/explore/data_examples/384/._data.json
- ScienceQA_Supplementary_Material/explore/data_examples/384/image.png
- __MACOSX/ScienceQA_Supplementary_Material/explore/data_examples/384/._image.png
- ScienceQA_Supplementary_Material/explore/data_examples/7/data.json
- __MACOSX/ScienceQA_Supplementary_Material/explore/data_examples/7/._data.json
- ScienceQA_Supplementary_Material/explore/data_examples/7/image.png
- __MACOSX/ScienceQA_Supplementary_Material/explore/data_examples/7/._image.png
- ScienceQA_Supplementary_Material/explore/data_examples/16/data.json
[truncated: 217 more entries]
