# Supplementary material
Source: ML conference proceedings conference paper supplement (https://proceedings.neurips.cc/paper_files/paper/2022/hash/11332b6b6cf4485b84afadb1352d3a9a-Abstract.html)
Supplement: Supplementary file 1 [file 11332b6b6cf4485b84afadb1352d3a9a-Supplemental-Conference.zip › ScienceQA_Supplementary_Material/explore/data_examples/6/data.json]

{
  "question":"What does the verbal irony in this text suggest?\nAccording to Mr. Herrera's kids, his snoring is as quiet as a jackhammer.",
  "choices":[
    "The snoring is loud.",
    "The snoring occurs in bursts."
  ],
  "answer":0,
  "hint":"",
  "image":null,
  "task":"closed choice",
  "grade":"grade8",
  "subject":"language science",
  "topic":"figurative-language",
  "category":"Literary devices",
  "skill":"Interpret figures of speech",
  "lecture":"Figures of speech are words or phrases that use language in a nonliteral or unusual way. They can make writing more expressive.\nVerbal irony involves saying one thing but implying something very different. People often use verbal irony when they are being sarcastic.\nOlivia seems thrilled that her car keeps breaking down.\nEach breakdown is as enjoyable as a punch to the face.",
  "solution":"The text uses verbal irony, which involves saying one thing but implying something very different.\nAs quiet as a jackhammer suggests that the snoring is loud. A jackhammer is not quiet, and neither is Mr. Herrera's snoring.",
  "split":"val"
}
