# Supplementary material
Source: ML conference proceedings conference paper supplement (https://proceedings.neurips.cc/paper_files/paper/2022/hash/11332b6b6cf4485b84afadb1352d3a9a-Abstract.html)
Supplement: Supplementary file 1 [file 11332b6b6cf4485b84afadb1352d3a9a-Supplemental-Conference.zip › ScienceQA_Supplementary_Material/explore/data_examples/8/data.json]

{
  "question":"Is this a sentence fragment?\nDuring the construction of Mount Rushmore, approximately eight hundred million pounds of rock from the mountain to create the monument.",
  "choices":[
    "no",
    "yes"
  ],
  "answer":1,
  "hint":"",
  "image":null,
  "task":"yes or no",
  "grade":"grade12",
  "subject":"language science",
  "topic":"writing-strategies",
  "category":"Sentences, fragments, and run-ons",
  "skill":"Identify sentence fragments",
  "lecture":"A sentence is a group of words that expresses a complete thought.\nThe band I'm in has been rehearsing daily because we have a concert in two weeks.\nA sentence fragment is a group of words that does not express a complete thought.\nRehearsing daily because we have a concert in two weeks.\nThis fragment is missing a subject. It doesn't tell who is rehearsing.\nThe band I'm in.\nThis fragment is missing a verb. It doesn't tell what the band I'm in is doing.\nBecause we have a concert in two weeks.\nThis fragment is missing an independent clause. It doesn't tell what happened because of the concert.",
  "solution":"This is a sentence fragment. It does not express a complete thought.\nDuring the construction of Mount Rushmore, approximately eight hundred million pounds of rock from the mountain to create the monument.\nHere is one way to fix the sentence fragment:\nDuring the construction of Mount Rushmore, approximately eight hundred million pounds of rock were removed from the mountain to create the monument.",
  "split":"val"
}
