# Supplementary material
Source: ML conference proceedings conference paper supplement (https://proceedings.neurips.cc/paper_files/paper/2022/hash/11332b6b6cf4485b84afadb1352d3a9a-Abstract.html)
Supplement: Supplementary file 1 [file 11332b6b6cf4485b84afadb1352d3a9a-Supplemental-Conference.zip › ScienceQA_Supplementary_Material/explore/data_examples/13/data.json]

{
  "question":"Which of the following could Wendy's test show?",
  "choices":[
    "whether producing more insulin would help the bacteria grow faster",
    "whether different types of bacteria would need different nutrients to produce insulin",
    "whether she added enough nutrients to help the bacteria produce 20% more insulin"
  ],
  "answer":2,
  "hint":"People can use the engineering-design process to develop solutions to problems. One step in the process is testing if a potential solution meets the requirements of the design.\nThe passage below describes how the engineering-design process was used to test a solution to a problem. Read the passage. Then answer the question below.\n\nPeople with diabetes sometimes take a medicine made from insulin. Insulin can be made by a special type of bacteria. Wendy was a bioengineer who wanted to increase the amount of insulin that the bacteria produced by 20%. She read that giving the bacteria more nutrients could affect the amount of insulin they produced. So, Wendy gave extra nutrients to some of the bacteria. Then, she measured how much insulin those bacteria produced compared to bacteria that did not get extra nutrients.\nFigure: studying bacteria in a laboratory.",
  "image":"image.png",
  "task":"closed choice",
  "grade":"grade7",
  "subject":"natural science",
  "topic":"science-and-engineering-practices",
  "category":"Engineering practices",
  "skill":"Evaluate tests of engineering-design solutions",
  "lecture":"People can use the engineering-design process to develop solutions to problems. One step in the process is testing if a potential solution meets the requirements of the design. How can you determine what a test can show? You need to figure out what was tested and what was measured.\nImagine an engineer needs to design a bridge for a windy location. She wants to make sure the bridge will not move too much in high wind. So, she builds a smaller prototype, or model, of a bridge. Then, she exposes the prototype to high winds and measures how much the bridge moves.\nFirst, identify what was tested. A test can examine one design, or it may compare multiple prototypes to each other. In the test described above, the engineer tested a prototype of a bridge in high wind.\nThen, identify what the test measured. One of the criteria for the bridge was that it not move too much in high winds. The test measured how much the prototype bridge moved.\nTests can show how well one or more designs meet the criteria. The test described above can show whether the bridge would move too much in high winds.",
  "solution":"",
  "split":"val"
}
