# Supplementary material
Source: ML conference proceedings conference paper supplement (https://proceedings.neurips.cc/paper_files/paper/2022/hash/11332b6b6cf4485b84afadb1352d3a9a-Abstract.html)
Supplement: Supplementary file 1 [file 11332b6b6cf4485b84afadb1352d3a9a-Supplemental-Conference.zip › ScienceQA_Supplementary_Material/explore/data_examples/14/data.json]

{
  "question":"Which correctly shows the title of a play?",
  "choices":[
    "A breath of Fresh Air",
    "A Breath of Fresh Air"
  ],
  "answer":1,
  "hint":"",
  "image":null,
  "task":"closed choice",
  "grade":"grade3",
  "subject":"language science",
  "topic":"capitalization",
  "category":"Formatting",
  "skill":"Capitalizing titles",
  "lecture":"In a title, capitalize the first word, the last word, and every important word in between.\nThe Wind in the Willows James and the Giant Peach\nThese words are not important in titles:\nArticles, a, an, the\nShort prepositions, such as at, by, for, in, of, on, to, up\nCoordinating conjunctions, such as and, but, or",
  "solution":"Capitalize the first word, the last word, and every important word in between. The word of is not important, so it should not be capitalized.\nThe correct title is A Breath of Fresh Air.",
  "split":"val"
}
