# Supplementary material
Source: ML conference proceedings conference paper supplement (https://proceedings.neurips.cc/paper_files/paper/2022/hash/11332b6b6cf4485b84afadb1352d3a9a-Abstract.html)
Supplement: Supplementary file 1 [file 11332b6b6cf4485b84afadb1352d3a9a-Supplemental-Conference.zip › ScienceQA_Supplementary_Material/explore/data_examples/16/data.json]

{
  "question":"Does this passage describe the weather or the climate?",
  "choices":[
    "weather",
    "climate"
  ],
  "answer":1,
  "hint":"Figure: Chicago.\nChicago is known as The Windy City. But on average, the wind there only blows at about 10 miles per hour.\nHint: Weather is what the atmosphere is like at a certain place and time. Climate is the pattern of weather in a certain place.",
  "image":"image.png",
  "task":"closed choice",
  "grade":"grade4",
  "subject":"natural science",
  "topic":"earth-science",
  "category":"Weather and climate",
  "skill":"Weather and climate around the world",
  "lecture":"The atmosphere is the layer of air that surrounds Earth. Both weather and climate tell you about the atmosphere.\nWeather is what the atmosphere is like at a certain place and time. Weather can change quickly. For example, the temperature outside your house might get higher throughout the day.\nClimate is the pattern of weather in a certain place. For example, summer temperatures in New York are usually higher than winter temperatures.",
  "solution":"Read the passage carefully.\nChicago is known as The Windy City. But on average, the wind there only blows at about 10 miles per hour.\nThe underlined part of the passage tells you about the usual wind patterns in Chicago. This passage does not describe what the weather is like on a particular day. So, this passage describes the climate.",
  "split":"val"
}
