# Supplementary material
Source: ML conference proceedings conference paper supplement (https://proceedings.neurips.cc/paper_files/paper/2022/hash/11332b6b6cf4485b84afadb1352d3a9a-Abstract.html)
Supplement: Supplementary file 1 [file 11332b6b6cf4485b84afadb1352d3a9a-Supplemental-Conference.zip › ScienceQA_Supplementary_Material/explore/data_examples/28/data.json]

{
  "question":"Which animal's feet are also adapted for grabbing prey?",
  "choices":[
    "sable",
    "New Zealand falcon"
  ],
  "answer":1,
  "hint":"Bald eagles eat fish, mammals, and other birds. The 's feet are adapted for grabbing prey.\nFigure: bald eagle.",
  "image":"image.png",
  "task":"closed choice",
  "grade":"grade5",
  "subject":"natural science",
  "topic":"biology",
  "category":"Adaptations",
  "skill":"Animal adaptations: feet and limbs",
  "lecture":"An adaptation is an inherited trait that helps an organism survive or reproduce. Adaptations can include both body parts and behaviors.\nThe shape of an animal's feet is one example of an adaptation. Animals' feet can be adapted in different ways. For example, webbed feet might help an animal swim. Feet with thick fur might help an animal walk on cold, snowy ground.",
  "solution":"Look at the picture of the bald eagle.\nThe bald eagle has long toes with sharp claws. Its feet are adapted for grabbing prey. The sharp claws can help the bald eagle attack and kill its prey. The long toes can help it hold on to its prey.\nNow look at each animal. Figure out which animal has a similar adaptation.\nThe New Zealand falcon has long toes with sharp claws. Its feet are adapted for grabbing prey.\nThe sable has hoofed feet. Its feet are not adapted for grabbing prey. The sable uses its feet to walk and run on hard ground.",
  "split":"val"
}
