# Supplementary material
Source: ML conference proceedings conference paper supplement (https://proceedings.neurips.cc/paper_files/paper/2022/hash/11332b6b6cf4485b84afadb1352d3a9a-Abstract.html)
Supplement: Supplementary file 1 [file 11332b6b6cf4485b84afadb1352d3a9a-Supplemental-Conference.zip › ScienceQA_Supplementary_Material/explore/data_examples/36/data.json]

{
  "question":"Is the following statement about our solar system true or false?\nJupiter's volume is more than 10,000 times as large as the volume of Mars.",
  "choices":[
    "true",
    "false"
  ],
  "answer":1,
  "hint":"Use the data to answer the question below.",
  "image":"image.png",
  "task":"true-or false",
  "grade":"grade8",
  "subject":"natural science",
  "topic":"earth-science",
  "category":"Astronomy",
  "skill":"Analyze data to compare properties of planets",
  "lecture":"A planet's volume tells you the size of the planet.\nThe primary composition of a planet is what the planet is made mainly of. In our solar system, planets are made mainly of rock, gas, or ice.\nThe volume of a planet is a very large quantity. Large quantities such as this are often written in scientific notation.\nFor example, the volume of Jupiter is 1,430,000,000,000,000 km^3. In scientific notation, Jupiter's volume is written as 1.43 x 10^15 km^3.\nTo compare two numbers written in scientific notation, first compare their exponents. The bigger the exponent is, the bigger the number is. For example:\n1.43 x 10^15 is larger than 1.43 x 10^12\nIf their exponents are equal, compare the first numbers. For example:\n1.43 x 10^15 is larger than 1.25 x 10^15\nTo multiply a number written in scientific notation by a power of 10, write the multiple of 10 as 10 raised to an exponent. Then, add the exponents. For example:\n1.43 x 10^15 \u00b7 1000\n= 1.43 x 10^15 \u00b7 10^3\n= 1.43 x 10^(15 + 3)\n= 1.43 x 10^18\n",
  "solution":"To determine if this statement is true, calculate the value of 10,000 times the volume of Mars.\nThen compare the result to the volume of Jupiter. Jupiter's volume is 1.43 x 10^15 km^3, which is less than 1.63 x 10^15 km^3. So, Jupiter's volume is less than 10,000 times as large as the volume of Mars.",
  "split":"val"
}
