# Supplementary material
Source: ML conference proceedings conference paper supplement (https://proceedings.neurips.cc/paper_files/paper/2022/hash/11332b6b6cf4485b84afadb1352d3a9a-Abstract.html)
Supplement: Supplementary file 1 [file 11332b6b6cf4485b84afadb1352d3a9a-Supplemental-Conference.zip › ScienceQA_Supplementary_Material/explore/data_examples/52/data.json]

{
  "question":"Complete the sentences.\nEarthquakes start () Earth's surface. During an earthquake, ().",
  "choices":[
    "above . . . the ground shakes",
    "above . . . the ground gets colder",
    "below . . . the ground shakes",
    "below . . . the ground gets colder"
  ],
  "answer":2,
  "hint":"",
  "image":null,
  "task":"closed choice",
  "grade":"grade3",
  "subject":"natural science",
  "topic":"literacy-in-science",
  "category":"Earth events",
  "skill":"Changes to Earth's surface: earthquakes",
  "lecture":"",
  "solution":"When an earthquake happens, the ground shakes. The word earthquake comes from the words earth and quake. The word earth means ground, and the word quake means to shake.\nAll earthquakes start below Earth's surface.",
  "split":"val"
}
