# Supplementary material
Source: ML conference proceedings conference paper supplement (https://proceedings.neurips.cc/paper_files/paper/2022/hash/11332b6b6cf4485b84afadb1352d3a9a-Abstract.html)
Supplement: Supplementary file 1 [file 11332b6b6cf4485b84afadb1352d3a9a-Supplemental-Conference.zip › ScienceQA_Supplementary_Material/explore/data_examples/55/data.json]

{
  "question":"Is Lithops bromfieldii made up of many cells?",
  "choices":[
    "yes",
    "no"
  ],
  "answer":0,
  "hint":"This organism is Lithops bromfieldii. It is a member of the plant kingdom.\nLithops bromfieldii lives in South Africa. Each L. bromfieldii is made up of two brown or gray leaves. Because of its unusual appearance, L. bromfieldii is sometimes called a living stone.",
  "image":"image.png",
  "task":"yes or no",
  "grade":"grade5",
  "subject":"natural science",
  "topic":"biology",
  "category":"Classification",
  "skill":"Describe, classify, and compare kingdoms",
  "lecture":"In the past, scientists classified living organisms into two groups: plants and animals. Over the past 300 years, scientists have discovered many more types of organisms. Today, many scientists classify organisms into six broad groups, called kingdoms.\nOrganisms in each kingdom have specific traits. The table below shows some traits used to describe each kingdom.\n | Bacteria | Archaea | Protists | Fungi | Animals | Plants\nHow many cells do they have? | one | one | one or many | one or many | many | many\nDo their cells have a nucleus? | no | no | yes | yes | yes | yes\nCan their cells make food? | some species can | some species can | some species can | no | no | yes",
  "solution":"Lithops bromfieldii is a plant. Plants are made up of many cells.",
  "split":"val"
}
