# Supplementary material
Source: ML conference proceedings conference paper supplement (https://proceedings.neurips.cc/paper_files/paper/2022/hash/11332b6b6cf4485b84afadb1352d3a9a-Abstract.html)
Supplement: Supplementary file 1 [file 11332b6b6cf4485b84afadb1352d3a9a-Supplemental-Conference.zip › ScienceQA_Supplementary_Material/explore/data_examples/60/data.json]

{
  "question":"Which bird's beak is also adapted to tear through meat?",
  "choices":[
    "sand martin",
    "Cape vulture"
  ],
  "answer":1,
  "hint":"Red-tailed hawks eat fish, mammals, and other birds. The shape of the 's beak is adapted to tear through meat.\nFigure: red-tailed hawk.",
  "image":"image.png",
  "task":"closed choice",
  "grade":"grade5",
  "subject":"natural science",
  "topic":"biology",
  "category":"Adaptations",
  "skill":"Animal adaptations: beaks, mouths, and necks",
  "lecture":"An adaptation is an inherited trait that helps an organism survive or reproduce. Adaptations can include both body parts and behaviors.\nThe shape of a bird's beak is one example of an adaptation. Birds' beaks can be adapted in different ways. For example, a sharp hooked beak might help a bird tear through meat easily. A short, thick beak might help a bird break through a seed's hard shell. Birds that eat similar food often have similar beaks.",
  "solution":"Look at the picture of the red-tailed hawk.\nThe red-tailed hawk has a sharp hooked beak. Its beak is adapted to tear through meat. The sharp hook can help the red-tailed hawk cut the meat into pieces it can swallow.\nNow look at each bird. Figure out which bird has a similar adaptation.\nThe Cape vulture has a sharp hooked beak. Its beak is adapted to tear through meat.\nThe sand martin has a short, thin beak. Its beak is not adapted to tear through meat. The sand martin uses its beak to eat insects and other small invertebrates.",
  "split":"val"
}
