# Supplementary material
Source: ML conference proceedings conference paper supplement (https://proceedings.neurips.cc/paper_files/paper/2022/hash/11332b6b6cf4485b84afadb1352d3a9a-Abstract.html)
Supplement: Supplementary file 1 [file 11332b6b6cf4485b84afadb1352d3a9a-Supplemental-Conference.zip › ScienceQA_Supplementary_Material/explore/data_examples/66/data.json]

{
  "question":"Which figure of speech is used in this text?\nAriel gazed at the ancient pug that seemed to sleep all day and noted, \"You're an energetic puppy!\"",
  "choices":[
    "idiom",
    "verbal irony"
  ],
  "answer":1,
  "hint":"",
  "image":null,
  "task":"closed choice",
  "grade":"grade7",
  "subject":"language science",
  "topic":"figurative-language",
  "category":"Literary devices",
  "skill":"Classify figures of speech",
  "lecture":"Figures of speech are words or phrases that use language in a nonliteral or unusual way. They can make writing more expressive.\nAlliteration is the repetition of sounds at the beginning of nearby words.\nWhat a lucky little lady you are!\nAn allusion is a brief reference to something or someone well known, often from history or literature.\n\"I'd better get home before I turn into a pumpkin!\" Lila remarked.\nAn idiom is an expression that cannot be understood literally. Its meaning must be learned.\nThe assignment was a piece of cake.\nA simile uses like or as to compare two things that are not actually alike.\nThe cat's fur was as dark as the night.\nA metaphor compares two things that are not actually alike without using like or as.\nThe snow formed a blanket over the town.\nOnomatopoeia involves using a word that expresses a sound.\nThe scrambled eggs hit the floor with a splat.\nPersonification is giving human characteristics to nonhuman things.\nThe trees danced in the wind.\nA pun involves using a word or phrase in a humorous way that suggests more than one meaning.\nA great new broom is sweeping the nation.\nVerbal irony involves saying one thing but implying something very different. People often use verbal irony when they are being sarcastic.\nOlivia seems thrilled that her car keeps breaking down.\nEach breakdown is as enjoyable as a punch to the face.",
  "solution":"The text uses verbal irony, which involves saying one thing but implying something very different.\nAn energetic puppy shows verbal irony because an old, exhausted dog is far from an energetic puppy.",
  "split":"val"
}
