# Supplementary material
Source: ML conference proceedings conference paper supplement (https://proceedings.neurips.cc/paper_files/paper/2022/hash/11332b6b6cf4485b84afadb1352d3a9a-Abstract.html)
Supplement: Supplementary file 1 [file 11332b6b6cf4485b84afadb1352d3a9a-Supplemental-Conference.zip › ScienceQA_Supplementary_Material/explore/data_examples/67/data.json]

{
  "question":"What is the source of the allusion in the sentence below?\nMichael dropped out of college to travel the world, but a year later, the prodigal son returned home and re-enrolled.",
  "choices":[
    "the Bible",
    "British history"
  ],
  "answer":0,
  "hint":"",
  "image":null,
  "task":"closed choice",
  "grade":"grade7",
  "subject":"language science",
  "topic":"figurative-language",
  "category":"Literary devices",
  "skill":"Recall the source of an allusion",
  "lecture":"An allusion is a brief mention of something or someone well known, often from mythology, history, or literature. An allusion lets you reference ideas from an entire story in just a few words.\n\"I'd better get home before I turn into a pumpkin!\" Lila remarked.\nHere, Lila alludes to the fairy tale \"Cinderella,\" in which Cinderella must leave the ball before the coach that brought her transforms into a pumpkin. The allusion shows that Lila must depart immediately.",
  "solution":"The source of the allusion prodigal son is the Bible.\nIn a Biblical parable, the prodigal son irresponsibly spends the inheritance given to him by his father. When he returns home, he expects to be shamed, but his father forgives him.\nThe allusion prodigal son means a person who behaves recklessly but later makes a repentant return.",
  "split":"val"
}
