# Supplementary material
Source: ML conference proceedings conference paper supplement (https://proceedings.neurips.cc/paper_files/paper/2022/hash/11332b6b6cf4485b84afadb1352d3a9a-Abstract.html)
Supplement: Supplementary file 1 [file 11332b6b6cf4485b84afadb1352d3a9a-Supplemental-Conference.zip › ScienceQA_Supplementary_Material/explore/data_examples/71/data.json]

{
  "question":"What is the volume of a car's gas tank?",
  "choices":[
    "40 milliliters",
    "40 liters"
  ],
  "answer":1,
  "hint":"Select the better estimate.",
  "image":null,
  "task":"closed choice",
  "grade":"grade5",
  "subject":"natural science",
  "topic":"units-and-measurement",
  "category":"Units and measurement",
  "skill":"Choose metric units of volume",
  "lecture":"Measurements are written with both a number and a unit. The unit comes after the number. The unit shows what the number means.\nVolume is a measurement of how much space something takes up.\nThere are many different units of volume. When you are using metric units, volume may be written in units of milliliters or liters.\nThere are 1,000 milliliters in 1 liter. So, 1 milliliter is much less than 1 liter.\nA raindrop has a volume of about 20 milliliters, while a large soda bottle has a volume of 2 liters. The flask shown here measures volumes up to 500 milliliters.",
  "solution":"The better estimate for the volume of a car's gas tank is 40 liters.\n40 milliliters is too little.",
  "split":"val"
}
