# Supplementary material
Source: ML conference proceedings conference paper supplement (https://proceedings.neurips.cc/paper_files/paper/2022/hash/11332b6b6cf4485b84afadb1352d3a9a-Abstract.html)
Supplement: Supplementary file 1 [file 11332b6b6cf4485b84afadb1352d3a9a-Supplemental-Conference.zip › ScienceQA_Supplementary_Material/explore/data_examples/72/data.json]

{
  "question":"Which of these states is farthest north?",
  "choices":[
    "Alabama",
    "Idaho",
    "South Carolina",
    "Oklahoma"
  ],
  "answer":1,
  "hint":"",
  "image":"image.png",
  "task":"closed choice",
  "grade":"grade2",
  "subject":"social science",
  "topic":"geography",
  "category":"Geography",
  "skill":"Read a map: cardinal directions",
  "lecture":"Maps have four cardinal directions, or main directions. Those directions are north, south, east, and west.\nA compass rose is a set of arrows that point to the cardinal directions. A compass rose usually shows only the first letter of each cardinal direction.\nThe north arrow points to the North Pole. On most maps, north is at the top of the map.",
  "solution":"To find the answer, look at the compass rose. Look at which way the north arrow is pointing. Idaho is farthest north.",
  "split":"val"
}
