# Supplementary material
Source: ML conference proceedings conference paper supplement (https://proceedings.neurips.cc/paper_files/paper/2022/hash/11332b6b6cf4485b84afadb1352d3a9a-Abstract.html)
Supplement: Supplementary file 1 [file 11332b6b6cf4485b84afadb1352d3a9a-Supplemental-Conference.zip › ScienceQA_Supplementary_Material/explore/data_examples/74/data.json]

{
  "question":"What information supports the conclusion that Austen acquired this trait?",
  "choices":[
    "Austen can cook food over a fire.",
    "Austen learned how to build a fire at summer camp."
  ],
  "answer":1,
  "hint":"Read the description of a trait.\nAusten knows how to build a fire.",
  "image":null,
  "task":"closed choice",
  "grade":"grade6",
  "subject":"natural science",
  "topic":"biology",
  "category":"Genes to traits",
  "skill":"Inherited and acquired traits: use evidence to support a statement",
  "lecture":"Organisms, including people, have both inherited and acquired traits. Inherited and acquired traits are gained in different ways.\nInherited traits are passed down from biological parents to their offspring through genes. Genes are pieces of hereditary material that contain the instructions that affect inherited traits. Offspring receive their genes, and therefore gain their inherited traits, from their biological parents. Inherited traits do not need to be learned.\nAcquired traits are gained during a person's life. Some acquired traits, such as riding a bicycle, are gained by learning. Other acquired traits, such as scars, are caused by the environment. Parents do not pass acquired traits down to their offspring.",
  "solution":"",
  "split":"val"
}
