# Supplementary material
Source: ML conference proceedings conference paper supplement (https://proceedings.neurips.cc/paper_files/paper/2022/hash/11332b6b6cf4485b84afadb1352d3a9a-Abstract.html)
Supplement: Supplementary file 1 [file 11332b6b6cf4485b84afadb1352d3a9a-Supplemental-Conference.zip › ScienceQA_Supplementary_Material/explore/data_examples/77/data.json]

{
  "question":"Which property do these three objects have in common?",
  "choices":[
    "bouncy",
    "hard",
    "soft"
  ],
  "answer":2,
  "hint":"Select the best answer.",
  "image":"image.png",
  "task":"closed choice",
  "grade":"grade4",
  "subject":"natural science",
  "topic":"physics",
  "category":"Materials",
  "skill":"Compare properties of objects",
  "lecture":"An object has different properties. A property of an object can tell you how it looks, feels, tastes, or smells. Properties can also tell you how an object will behave when something happens to it.\nDifferent objects can have properties in common. You can use these properties to put objects into groups. Grouping objects by their properties is called classification.",
  "solution":"Look at each object.\nFor each object, decide if it has that property.\nA hard object does not change shape when pressed or squeezed. None of the objects are hard.\nA bouncy object will bounce back from the floor if you drop it. None of the objects are bouncy.\nA soft object changes shape when pressed or squeezed. All three objects are soft.\nThe property that all three objects have in common is soft.",
  "split":"val"
}
