# Supplementary material
Source: ML conference proceedings conference paper supplement (https://proceedings.neurips.cc/paper_files/paper/2022/hash/11332b6b6cf4485b84afadb1352d3a9a-Abstract.html)
Supplement: Supplementary file 1 [file 11332b6b6cf4485b84afadb1352d3a9a-Supplemental-Conference.zip › ScienceQA_Supplementary_Material/explore/data_examples/79/data.json]

{
  "question":"Which of the following is true about seeds?",
  "choices":[
    "Seeds come in many shapes. But all seeds are black.",
    "Seeds can come in many shapes and colors.",
    "Seeds come in many colors. But all seeds are round."
  ],
  "answer":1,
  "hint":"",
  "image":null,
  "task":"closed choice",
  "grade":"grade4",
  "subject":"natural science",
  "topic":"biology",
  "category":"Plants",
  "skill":"Describe and construct flowering plant life cycles",
  "lecture":"Many plants have flowers. These plants can use their flowers to reproduce, or make new plants like themselves. How do plants use their flowers to reproduce?\nFirst, the male part of the flower makes pollen, and the female part makes eggs. Animals, wind, or water can move pollen. Pollination is what happens when pollen is moved to the female part of the flower.\nAfter pollination, sperm from the pollen can combine with the eggs. This is called fertilization. The fertilized eggs grow into seeds. The fruit grows around the seeds. Later, a seed can fall out of the fruit. It can germinate, or start to grow into a new plant.",
  "solution":"Seeds can be big or small. This coconut seed is big.\nSeeds can be many different shapes. These maple seeds are long and flat.\nSeeds can be many different colors. These mustard seeds are yellow.",
  "split":"val"
}
