# Supplementary material
Source: ML conference proceedings conference paper supplement (https://proceedings.neurips.cc/paper_files/paper/2022/hash/11332b6b6cf4485b84afadb1352d3a9a-Abstract.html)
Supplement: Supplementary file 1 [file 11332b6b6cf4485b84afadb1352d3a9a-Supplemental-Conference.zip › ScienceQA_Supplementary_Material/explore/data_examples/81/data.json]

{
  "question":"Identify the question that Tyrone and Quincy's experiment can best answer.",
  "choices":[
    "Do ping pong balls stop rolling along the ground sooner after being launched from a 30\u00b0 angle or a 45\u00b0 angle?",
    "Do ping pong balls travel farther when launched from a 30\u00b0 angle compared to a 45\u00b0 angle?"
  ],
  "answer":1,
  "hint":"The passage below describes an experiment. Read the passage and then follow the instructions below.\n\nTyrone placed a ping pong ball in a catapult, pulled the catapult's arm back to a 45\u00b0 angle, and launched the ball. Then, Tyrone launched another ping pong ball, this time pulling the catapult's arm back to a 30\u00b0 angle. With each launch, his friend Quincy measured the distance between the catapult and the place where the ball hit the ground. Tyrone and Quincy repeated the launches with ping pong balls in four more identical catapults. They compared the distances the balls traveled when launched from a 45\u00b0 angle to the distances the balls traveled when launched from a 30\u00b0 angle.\nFigure: a catapult for launching ping pong balls.",
  "image":"image.png",
  "task":"closed choice",
  "grade":"grade8",
  "subject":"natural science",
  "topic":"science-and-engineering-practices",
  "category":"Designing experiments",
  "skill":"Identify the experimental question",
  "lecture":"Experiments can be designed to answer specific questions. How can you identify the questions that a certain experiment can answer? In order to do this, you need to figure out what was tested and what was measured during the experiment.\nImagine an experiment with two groups of daffodil plants. One group of plants was grown in sandy soil, and the other was grown in clay soil. Then, the height of each plant was measured.\nFirst, identify the part of the experiment that was tested. The part of an experiment that is tested usually involves the part of the experimental setup that is different or changed. In the experiment described above, each group of plants was grown in a different type of soil. So, the effect of growing plants in different soil types was tested.\nThen, identify the part of the experiment that was measured. The part of the experiment that is measured may include measurements and calculations. In the experiment described above, the heights of the plants in each group were measured.\nExperiments can answer questions about how the part of the experiment that is tested affects the part that is measured. So, the experiment described above can answer questions about how soil type affects plant height.\nExamples of questions that this experiment can answer include:\nDoes soil type affect the height of daffodil plants?\nDo daffodil plants in sandy soil grow taller than daffodil plants in clay soil?\nAre daffodil plants grown in sandy soil shorter than daffodil plants grown in clay soil?",
  "solution":"",
  "split":"val"
}
