# Supplementary material
Source: ML conference proceedings conference paper supplement (https://proceedings.neurips.cc/paper_files/paper/2022/hash/11332b6b6cf4485b84afadb1352d3a9a-Abstract.html)
Supplement: Supplementary file 1 [file 11332b6b6cf4485b84afadb1352d3a9a-Supplemental-Conference.zip › ScienceQA_Supplementary_Material/explore/data_examples/82/data.json]

{
  "question":"Which animal's mouth is also adapted for bottom feeding?",
  "choices":[
    "clown triggerfish",
    "sturgeon"
  ],
  "answer":1,
  "hint":"Armored catfish eat plants and small invertebrates. They are bottom feeders. Bottom feeders find their food at the bottom of rivers, lakes, and the ocean.\nThe catfish's mouth is located on the underside of its head and points downward. Its mouth is adapted for bottom feeding.\nFigure: armored catfish.",
  "image":"image.png",
  "task":"closed choice",
  "grade":"grade3",
  "subject":"natural science",
  "topic":"biology",
  "category":"Adaptations",
  "skill":"Animal adaptations: beaks, mouths, and necks",
  "lecture":"An adaptation is an inherited trait that helps an organism survive or reproduce. Adaptations can include both body parts and behaviors.\nThe shape of an animal's mouth is one example of an adaptation. Animals' mouths can be adapted in different ways. For example, a large mouth with sharp teeth might help an animal tear through meat. A long, thin mouth might help an animal catch insects that live in holes. Animals that eat similar food often have similar mouths.",
  "solution":"Look at the picture of the armored catfish.\nThe armored catfish's mouth is located on the underside of its head and points downward. Its mouth is adapted for bottom feeding. The armored catfish uses its mouth to find food hidden in the sediment at the bottom of rivers and streams.\nNow look at each animal. Figure out which animal has a similar adaptation.\nThe sturgeon's mouth is located on the underside of its head and points downward. Its mouth is adapted for bottom feeding.\nThe clown triggerfish's mouth is not located on the underside of its head. Its mouth is not adapted for bottom feeding.",
  "split":"val"
}
