# Supplementary material
Source: ML conference proceedings conference paper supplement (https://proceedings.neurips.cc/paper_files/paper/2022/hash/11332b6b6cf4485b84afadb1352d3a9a-Abstract.html)
Supplement: Supplementary file 1 [file 11332b6b6cf4485b84afadb1352d3a9a-Supplemental-Conference.zip › ScienceQA_Supplementary_Material/explore/data_examples/89/data.json]

{
  "question":"What is the temperature of the air on a cold, rainy day?",
  "choices":[
    "41\u00b0C",
    "41\u00b0F"
  ],
  "answer":1,
  "hint":"Select the better estimate.",
  "image":null,
  "task":"closed choice",
  "grade":"grade6",
  "subject":"natural science",
  "topic":"units-and-measurement",
  "category":"Units and measurement",
  "skill":"Estimate temperatures",
  "lecture":"Measurements are written with both a number and a unit. The unit comes after the number. The unit shows what the number means.\nTemperature can be written with units of degrees Fahrenheit (\u00b0F) or Celsius (\u00b0C). Use the list below to compare the two units.\n212\u00b0F | Water boils | 100\u00b0C\n98.6\u00b0F | Body temperature | 37\u00b0C\n68\u00b0F | Room temperature | 20\u00b0C\n32\u00b0F | Water freezes | 0\u00b0C\n",
  "solution":"The better estimate for the temperature of the air on a cold, rainy day is 41\u00b0F.\n41\u00b0C is too hot.",
  "split":"val"
}
