# Supplementary material
Source: ML conference proceedings conference paper supplement (https://proceedings.neurips.cc/paper_files/paper/2022/hash/11332b6b6cf4485b84afadb1352d3a9a-Abstract.html)
Supplement: Supplementary file 1 [file 11332b6b6cf4485b84afadb1352d3a9a-Supplemental-Conference.zip › ScienceQA_Supplementary_Material/explore/data_examples/101/data.json]

{
  "question":"Which property do these two objects have in common?",
  "choices":[
    "salty",
    "sour"
  ],
  "answer":1,
  "hint":"Select the better answer.",
  "image":"image.png",
  "task":"closed choice",
  "grade":"grade2",
  "subject":"natural science",
  "topic":"physics",
  "category":"Materials",
  "skill":"Compare properties of objects",
  "lecture":"An object has different properties. A property of an object can tell you how it looks, feels, tastes, or smells.\nDifferent objects can have the same properties. You can use these properties to put objects into groups.",
  "solution":"Look at each object.\nFor each object, decide if it has that property.\nA lemon has a sour taste. Both objects are sour.\nPotato chips have a salty taste. The lime is not salty.\nThe property that both objects have in common is sour.",
  "split":"val"
}
