# Supplementary material
Source: ML conference proceedings conference paper supplement (https://proceedings.neurips.cc/paper_files/paper/2022/hash/11332b6b6cf4485b84afadb1352d3a9a-Abstract.html)
Supplement: Supplementary file 1 [file 11332b6b6cf4485b84afadb1352d3a9a-Supplemental-Conference.zip › ScienceQA_Supplementary_Material/explore/data_examples/106/data.json]

{
  "question":"Based on the arrows, which of the following organisms is a consumer?",
  "choices":[
    "barren-ground caribou",
    "bear sedge"
  ],
  "answer":0,
  "hint":"Below is a food web from a tundra ecosystem in Nunavut, a territory in Northern Canada.\nA food web models how the matter eaten by organisms moves through an ecosystem. The arrows in a food web represent how matter moves between organisms in an ecosystem.",
  "image":"image.png",
  "task":"closed choice",
  "grade":"grade4",
  "subject":"natural science",
  "topic":"biology",
  "category":"Ecosystems",
  "skill":"Interpret food webs",
  "lecture":"A food web is a model.\nA food web shows where organisms in an ecosystem get their food. Models can make things in nature easier to understand because models can represent complex things in a simpler way. If a food web showed every organism in an ecosystem, the food web would be hard to understand. So, each food web shows how some organisms in an ecosystem can get their food.\nArrows show how matter moves.\nA food web has arrows that point from one organism to another. Each arrow shows the direction that matter moves when one organism eats another organism. An arrow starts from the organism that is eaten. The arrow points to the organism that is doing the eating.\nAn organism in a food web can have more than one arrow pointing from it. This shows that the organism is eaten by more than one other organism in the food web.\nAn organism in a food web can also have more than one arrow pointing to it. This shows that the organism eats more than one other organism in the food web.",
  "solution":"Consumers eat other organisms. So, there are arrows in a food web that point from other organisms to consumers.\nThe barren-ground caribou has an arrow pointing to it from the lichen. So, the barren-ground caribou is a consumer.\nThe bear sedge does not have any arrows pointing to it. So, the bear sedge is a producer, not a consumer.",
  "split":"val"
}
