# Supplementary material
Source: ML conference proceedings conference paper supplement (https://proceedings.neurips.cc/paper_files/paper/2022/hash/11332b6b6cf4485b84afadb1352d3a9a-Abstract.html)
Supplement: Supplementary file 1 [file 11332b6b6cf4485b84afadb1352d3a9a-Supplemental-Conference.zip › ScienceQA_Supplementary_Material/explore/data_examples/113/data.json]

{
  "question":"Compare the motion of three ships. Which ship was moving at the lowest speed?",
  "choices":[
    "a ship that moved 555kilometers west in 10hours",
    "a ship that moved 95kilometers south in 10hours",
    "a ship that moved 460kilometers south in 10hours"
  ],
  "answer":1,
  "hint":"",
  "image":null,
  "task":"closed choice",
  "grade":"grade3",
  "subject":"natural science",
  "topic":"physics",
  "category":"Force and motion",
  "skill":"Compare the speeds of moving objects",
  "lecture":"An object's speed tells you how fast the object is moving. Speed depends on both distance and time.\nDistance tells you how far the object has moved. One unit used to measure distance is the kilometer.\nTime tells you how long the object has spent moving. One unit used to measure time is the hour.\nThink about objects moving for the same amount of time. The object that is moving the slowest will go the shortest distance in that time. It is moving at the lowest speed.",
  "solution":"Look at the distance each ship moved and the time it took to move that distance. The direction each ship moved does not affect its speed.\nNotice that each ship moved for 10 hours. The ship that moved 95 kilometers moved the shortest distance in that time. So, that ship must have moved at the lowest speed.",
  "split":"val"
}
