# Supplementary material
Source: ML conference proceedings conference paper supplement (https://proceedings.neurips.cc/paper_files/paper/2022/hash/11332b6b6cf4485b84afadb1352d3a9a-Abstract.html)
Supplement: Supplementary file 1 [file 11332b6b6cf4485b84afadb1352d3a9a-Supplemental-Conference.zip › ScienceQA_Supplementary_Material/explore/data_examples/118/data.json]

{
  "question":"Based on this information, what is Sasha's phenotype for the fur length trait?",
  "choices":[
    "Ff",
    "short fur"
  ],
  "answer":1,
  "hint":"In a group of dogs, some individuals have short fur and others have long fur. In this group, the gene for the fur length trait has two alleles. The allele F is for short fur, and the allele f is for long fur.\nSasha, a dog from this group, has short fur. Sasha has one allele for short fur and one allele for long fur.",
  "image":null,
  "task":"closed choice",
  "grade":"grade7",
  "subject":"natural science",
  "topic":"biology",
  "category":"Genes to traits",
  "skill":"Genetics vocabulary: genotype and phenotype",
  "lecture":"All organisms have pieces of hereditary material called genes, which are passed from parents to offspring. Genes contain instructions for building the parts of an organism. An organism's genes affect its observable traits, including its appearance, its behavior, and which diseases it may have. Genes may have different alleles, or forms, that can cause different versions of a trait.\nFor example, flower color is a trait in pea plants. The gene for this trait has two possible alleles. Each allele is represented by an uppercase or lowercase letter. The allele F is for purple flowers, and the allele f is for white flowers. Each pea plant has two alleles for the flower color gene\u2014one allele inherited from each parent.\nAn organism's genotype for a gene is its combination of alleles for that gene. So, a pea plant may have a genotype of FF, Ff, or ff for the flower color gene.\nAn organism's phenotype for a trait is its observable version of that trait, which depends on the organism's combination of alleles. A pea plant may have a phenotype of purple flowers or white flowers for the flower color trait.",
  "solution":"An organism's phenotype for a trait is its observable version of that trait. Sasha's observable version of the fur length trait is short fur. So, Sasha's phenotype for the fur length trait is short fur.",
  "split":"val"
}
