# Supplementary material
Source: ML conference proceedings conference paper supplement (https://proceedings.neurips.cc/paper_files/paper/2022/hash/11332b6b6cf4485b84afadb1352d3a9a-Abstract.html)
Supplement: Supplementary file 1 [file 11332b6b6cf4485b84afadb1352d3a9a-Supplemental-Conference.zip › ScienceQA_Supplementary_Material/explore/data_examples/122/data.json]

{
  "question":"Which is a compound sentence?",
  "choices":[
    "Those carpenters use wood to build stairways and doorframes.",
    "Our dog Rusty had rolled around in the mud, so we gave him a bath."
  ],
  "answer":1,
  "hint":"",
  "image":null,
  "task":"closed choice",
  "grade":"grade4",
  "subject":"language science",
  "topic":"grammar",
  "category":"Sentences, fragments, and run-ons",
  "skill":"Is the sentence simple or compound?",
  "lecture":"A simple sentence is a sentence with only one subject and predicate.\nThe pitcher threw the ball to first base.\nA compound sentence is two simple sentences joined by a comma and a conjunction such as and, but, or, or so.\nThe pitcher threw the ball, and the batter hit it.\nSome simple sentences have a compound subject or a compound predicate, but they are not compound sentences.\nAnna and James will watch the fireworks tonight.\nThis simple sentence has a compound subject, Anna and James.\nThe singers bowed and walked off the stage.\nThis simple sentence has a compound predicate, bowed and walked off the stage.\nSome simple sentences have introductory phrases, but they are not compound sentences. The introductory phrase is part of the predicate.\nIn the winter, Farmer Ben wears his heavy coat.\nThis is a simple sentence. There is one subject, Farmer Ben, and one predicate, wears his heavy coat in the winter.",
  "solution":"The first sentence is the compound sentence. It is made up of two simple sentences joined by a comma and the conjunction so.\nOur dog Rusty had rolled around in the mud, so we gave him a bath.",
  "split":"val"
}
