# Supplementary material
Source: ML conference proceedings conference paper supplement (https://proceedings.neurips.cc/paper_files/paper/2022/hash/11332b6b6cf4485b84afadb1352d3a9a-Abstract.html)
Supplement: Supplementary file 1 [file 11332b6b6cf4485b84afadb1352d3a9a-Supplemental-Conference.zip › ScienceQA_Supplementary_Material/explore/data_examples/124/data.json]

{
  "question":"What is the expected ratio of offspring with black eyes to offspring with red eyes? Choose the most likely ratio.",
  "choices":[
    "1:3",
    "2:2",
    "4:0",
    "3:1",
    "0:4"
  ],
  "answer":2,
  "hint":"In a group of koi fish, some individuals have red eyes and others have black eyes. In this group, the gene for the eye color trait has two alleles. The allele for red eyes (E) is dominant over the allele for black eyes (e).\nThis Punnett square shows a cross between two koi fish.",
  "image":"image.png",
  "task":"closed choice",
  "grade":"grade8",
  "subject":"natural science",
  "topic":"biology",
  "category":"Genes to traits",
  "skill":"Use Punnett squares to calculate ratios of offspring types",
  "lecture":"Offspring phenotypes: dominant or recessive?\nHow do you determine an organism's phenotype for a trait? Look at the combination of alleles in the organism's genotype for the gene that affects that trait. Some alleles have types called dominant and recessive. These two types can cause different versions of the trait to appear as the organism's phenotype.\nIf an organism's genotype has at least one dominant allele for a gene, the organism's phenotype will be the dominant allele's version of the gene's trait.\nIf an organism's genotype has only recessive alleles for a gene, the organism's phenotype will be the recessive allele's version of the gene's trait.\nA Punnett square shows what types of offspring a cross can produce. The expected ratio of offspring types compares how often the cross produces each type of offspring, on average. To write this ratio, count the number of boxes in the Punnett square representing each type.\nFor example, consider the Punnett square below.\n | F | f\nF | FF | Ff\nf | Ff | ff\nThere is 1 box with the genotype FF and 2 boxes with the genotype Ff. So, the expected ratio of offspring with the genotype FF to those with Ff is 1:2.\n",
  "solution":"To determine how many boxes in the Punnett square represent offspring with black eyes or red eyes, consider whether each phenotype is the dominant or recessive allele's version of the eye color trait. The question tells you that the E allele, which is for red eyes, is dominant over the e allele, which is for black eyes.\nBlack eyes is the recessive allele's version of the eye color trait. A koi fish with the recessive version of the eye color trait must have only recessive alleles for the eye color gene. So, offspring with black eyes must have the genotype ee.\nAll 4 boxes in the Punnett square have the genotype ee.\nRed eyes is the dominant allele's version of the eye color trait. A koi fish with the dominant version of the eye color trait must have at least one dominant allele for the eye color gene. So, offspring with red eyes must have the genotype EE or Ee.\nThere are 0 boxes in the Punnett square with the genotype EE or Ee.\nSo, the expected ratio of offspring with black eyes to offspring with red eyes is 4:0. This means that, based on the Punnett square, this cross will always produce offspring with black eyes. This cross is expected to never produce offspring with red eyes.",
  "split":"val"
}
