# Supplementary material
Source: ML conference proceedings conference paper supplement (https://proceedings.neurips.cc/paper_files/paper/2022/hash/11332b6b6cf4485b84afadb1352d3a9a-Abstract.html)
Supplement: Supplementary file 1 [file 11332b6b6cf4485b84afadb1352d3a9a-Supplemental-Conference.zip › ScienceQA_Supplementary_Material/explore/data_examples/127/data.json]

{
  "question":"The shopper lifts each bag at the same speed. Which bag is lifted with a larger force?",
  "choices":[
    "a bag holding 4 pounds of food",
    "a bag holding 5 pounds of food"
  ],
  "answer":1,
  "hint":"A shopper is buying food at the store. He fills two shopping bags. The shopping bags are the same size and shape.",
  "image":null,
  "task":"closed choice",
  "grade":"grade2",
  "subject":"natural science",
  "topic":"physics",
  "category":"Force and motion",
  "skill":"How do mass and force affect motion?",
  "lecture":"A force is a push or a pull.\nA force can make an object start moving or stop an object that is moving. A force can also make an object speed up, slow down, or change direction.\nForces can be different sizes.\nThink about trying to move a heavy object and a light object. Imagine you want to move them at the same speed. You will need to use a larger force to move the heavy object.",
  "solution":"Look for the shopping bag that is heavier.\nA shopping bag holding 5 pounds of food is heavier than a shopping bag holding 4 pounds of food. So, the bag holding 5 pounds needs a larger force to start moving upward at the same speed as the other bag.",
  "split":"val"
}
