# Supplementary material
Source: ML conference proceedings conference paper supplement (https://proceedings.neurips.cc/paper_files/paper/2022/hash/11332b6b6cf4485b84afadb1352d3a9a-Abstract.html)
Supplement: Supplementary file 1 [file 11332b6b6cf4485b84afadb1352d3a9a-Supplemental-Conference.zip › ScienceQA_Supplementary_Material/explore/data_examples/147/data.json]

{
  "question":"What information supports the conclusion that Rosa inherited this trait?",
  "choices":[
    "Rosa's hair is the same color as her brown eyes.",
    "Rosa's father has brown eyes. He passed this trait down to Rosa."
  ],
  "answer":1,
  "hint":"Read the description of a trait.\nRosa has brown eyes.",
  "image":null,
  "task":"closed choice",
  "grade":"grade4",
  "subject":"natural science",
  "topic":"biology",
  "category":"Traits and heredity",
  "skill":"Inherited and acquired traits: use evidence to support a statement",
  "lecture":"Organisms, including people, have both inherited and acquired traits. Inherited and acquired traits are gained in different ways.\nInherited traits are passed down through families. Children gain these traits from their parents. Inherited traits do not need to be learned.\nAcquired traits are gained during a person's life. Some acquired traits, such as riding a bicycle, are gained by learning. Other acquired traits, such as scars, are caused by the environment.",
  "solution":"",
  "split":"val"
}
