# Supplementary material
Source: ML conference proceedings conference paper supplement (https://proceedings.neurips.cc/paper_files/paper/2022/hash/11332b6b6cf4485b84afadb1352d3a9a-Abstract.html)
Supplement: Supplementary file 1 [file 11332b6b6cf4485b84afadb1352d3a9a-Supplemental-Conference.zip › ScienceQA_Supplementary_Material/explore/data_examples/148/data.json]

{
  "question":"Identify the question that Reba and Donald's experiment can best answer.",
  "choices":[
    "Does Reba's snowboard slide down a hill in less time when it has a layer of wax or when it does not have a layer of wax?",
    "Does Reba's snowboard slide down a hill in less time when it has a thin layer of wax or a thick layer of wax?"
  ],
  "answer":0,
  "hint":"The passage below describes an experiment. Read the passage and then follow the instructions below.\n\nReba applied a thin layer of wax to the underside of her snowboard and rode the board straight down a hill. Then, she removed the wax and rode the snowboard straight down the hill again. She repeated the rides four more times, alternating whether she rode with a thin layer of wax on the board or not. Her friend Donald timed each ride. Reba and Donald calculated the average time it took to slide straight down the hill on the snowboard with wax compared to the average time on the snowboard without wax.\nFigure: snowboarding down a hill.",
  "image":"image.png",
  "task":"closed choice",
  "grade":"grade6",
  "subject":"natural science",
  "topic":"science-and-engineering-practices",
  "category":"Designing experiments",
  "skill":"Identify the experimental question",
  "lecture":"Experiments can be designed to answer specific questions. How can you identify the questions that a certain experiment can answer? In order to do this, you need to figure out what was tested and what was measured during the experiment.\nImagine an experiment with two groups of daffodil plants. One group of plants was grown in sandy soil, and the other was grown in clay soil. Then, the height of each plant was measured.\nFirst, identify the part of the experiment that was tested. The part of an experiment that is tested usually involves the part of the experimental setup that is different or changed. In the experiment described above, each group of plants was grown in a different type of soil. So, the effect of growing plants in different soil types was tested.\nThen, identify the part of the experiment that was measured. The part of the experiment that is measured may include measurements and calculations. In the experiment described above, the heights of the plants in each group were measured.\nExperiments can answer questions about how the part of the experiment that is tested affects the part that is measured. So, the experiment described above can answer questions about how soil type affects plant height.\nExamples of questions that this experiment can answer include:\nDoes soil type affect the height of daffodil plants?\nDo daffodil plants in sandy soil grow taller than daffodil plants in clay soil?\nAre daffodil plants grown in sandy soil shorter than daffodil plants grown in clay soil?",
  "solution":"",
  "split":"val"
}
