# Supplementary material
Source: ML conference proceedings conference paper supplement (https://proceedings.neurips.cc/paper_files/paper/2022/hash/11332b6b6cf4485b84afadb1352d3a9a-Abstract.html)
Supplement: Supplementary file 1 [file 11332b6b6cf4485b84afadb1352d3a9a-Supplemental-Conference.zip › ScienceQA_Supplementary_Material/explore/data_examples/150/data.json]

{
  "question":"Which term matches the picture?",
  "choices":[
    "appendicular skeleton",
    "axial skeleton"
  ],
  "answer":1,
  "hint":"Read the text.\nYou may think of the human skeleton as one big collection of bones (206 to be exact), but it actually consists of two parts: the axial skeleton and the appendicular skeleton. The axial skeleton is made up of the bones and cartilage of the head and torso, including the skull, vertebral column, and rib cage. It protects most of our vital organs, like the brain and heart, and supports the weight of our bodies. In contrast, the bones in our appendicular skeleton allow us to move. They include the bone and cartilage in our limbs, like the bones in our arms and feet.",
  "image":"image.png",
  "task":"closed choice",
  "grade":"grade8",
  "subject":"language science",
  "topic":"word-study",
  "category":"Domain-specific vocabulary",
  "skill":"Determine the meaning of domain-specific words with pictures",
  "lecture":"",
  "solution":"The axial skeleton is the part the human skeleton that makes up the head and torso. It includes the skull, vertebral column, and rib cage.",
  "split":"val"
}
