# Supplementary material
Source: ML conference proceedings conference paper supplement (https://proceedings.neurips.cc/paper_files/paper/2022/hash/11332b6b6cf4485b84afadb1352d3a9a-Abstract.html)
Supplement: Supplementary file 1 [file 11332b6b6cf4485b84afadb1352d3a9a-Supplemental-Conference.zip › ScienceQA_Supplementary_Material/explore/data_examples/153/data.json]

{
  "question":"Which logical fallacy is used in the text?\nDid you really vote for Richard as class treasurer? Didn't you hear that his uncle was imprisoned for embezzling $1.5 million?",
  "choices":[
    "circular reasoning: an argument that supports a claim with the claim itself",
    "guilt by association: a negative association intended to discredit someone or something"
  ],
  "answer":1,
  "hint":"",
  "image":null,
  "task":"closed choice",
  "grade":"grade8",
  "subject":"language science",
  "topic":"writing-strategies",
  "category":"Developing and supporting arguments",
  "skill":"Classify logical fallacies",
  "lecture":"A strong argument uses valid reasoning and logic in support of a claim. When an argument or claim introduces irrelevant information or misrepresents the issues at hand, it may be committing a logical fallacy. Logical fallacies can hurt a writer's credibility and can lead readers to draw false conclusions.\nA logical fallacy may present irrelevant information:\nFallacy | Description\nad hominem | a personal attack meant to discredit one's opponent\nappeal to nature | an argument that assumes the natural choice is always the best choice\nbandwagon fallacy | an argument that assumes the popular choice is always the best choice\ncircular reasoning | an argument that supports a claim with the claim itself\nguilt by association | an unfair negative association with another person or group that is intended to discredit someone or something\nred herring | the use of a completely unrelated topic in support of a claim\nA logical fallacy may misrepresent the issues at hand:\nFallacy | Description\nfalse causation | the assumption that because two things happened together, one caused the other\nfalse dichotomy | an argument that presents only two choices when more options exist\nhasty generalization | a very broad claim based on very little evidence\nstraw man | a misrepresentation of an opponent's position that makes it easier to argue against\n",
  "solution":"The text argues that Richard can't be trusted with money, because his uncle embezzled money. However, even though his uncle couldn't be trusted with money, that doesn't necessarily mean that Richard can't be trusted with it. This illustrates a type of logical fallacy known as guilt by association.",
  "split":"val"
}
