# Supplementary material
Source: ML conference proceedings conference paper supplement (https://proceedings.neurips.cc/paper_files/paper/2022/hash/11332b6b6cf4485b84afadb1352d3a9a-Abstract.html)
Supplement: Supplementary file 1 [file 11332b6b6cf4485b84afadb1352d3a9a-Supplemental-Conference.zip › ScienceQA_Supplementary_Material/explore/data_examples/164/data.json]

{
  "question":"Complete the sentence.\nSalt and vinegar removing tarnish from a penny is a ().",
  "choices":[
    "physical change",
    "chemical change"
  ],
  "answer":1,
  "hint":"",
  "image":null,
  "task":"closed choice",
  "grade":"grade6",
  "subject":"natural science",
  "topic":"chemistry",
  "category":"Chemical reactions",
  "skill":"Compare physical and chemical changes",
  "lecture":"Matter is made of very small particles called atoms. Atoms can be linked together by chemical bonds. When two or more atoms link together, they form a molecule.\nIn a chemical change, the chemical bonds in the molecules break. The atoms then link together to form new molecules. The types of molecules in matter before and after a chemical change are always different.\nBurning a piece of paper is a chemical change. As paper burns, paper molecules react with oxygen molecules in the air. This reaction breaks the chemical bonds in the molecules. The atoms then relink and form different molecules. For example, carbon dioxide molecules are created when paper burns.\nIn a physical change, chemical bonds do not break. The types of molecules in matter before and after a physical change are always the same.\nA change of state is a type of physical change. For example, water vaporizing is a physical change. Liquid water and water vapor are made of the same type of matter: water.",
  "solution":"Salt and vinegar removing tarnish from a penny is a chemical change. The salt and vinegar change the tarnish into a different type of matter that can be easily wiped away. This makes the penny look shiny again.",
  "split":"val"
}
