# Supplementary material
Source: ML conference proceedings conference paper supplement (https://proceedings.neurips.cc/paper_files/paper/2022/hash/11332b6b6cf4485b84afadb1352d3a9a-Abstract.html)
Supplement: Supplementary file 1 [file 11332b6b6cf4485b84afadb1352d3a9a-Supplemental-Conference.zip › ScienceQA_Supplementary_Material/explore/data_examples/165/data.json]

{
  "question":"Does this passage describe the weather or the climate?",
  "choices":[
    "climate",
    "weather"
  ],
  "answer":1,
  "hint":"Figure: Lhasa.\nLhasa is a city in the high mountains of Tibet. The winds there were blowing at 30 miles per hour this morning.\nHint: Weather is what the atmosphere is like at a certain place and time. Climate is the pattern of weather in a certain place.",
  "image":"image.png",
  "task":"closed choice",
  "grade":"grade4",
  "subject":"natural science",
  "topic":"earth-science",
  "category":"Weather and climate",
  "skill":"Weather and climate around the world",
  "lecture":"The atmosphere is the layer of air that surrounds Earth. Both weather and climate tell you about the atmosphere.\nWeather is what the atmosphere is like at a certain place and time. Weather can change quickly. For example, the temperature outside your house might get higher throughout the day.\nClimate is the pattern of weather in a certain place. For example, summer temperatures in New York are usually higher than winter temperatures.",
  "solution":"Read the passage carefully.\nLhasa is a city in the high mountains of Tibet. The winds there were blowing at 30 miles per hour this morning.\nThe underlined part of the passage tells you about the wind speed in Lhasa this morning. This passage describes the atmosphere at a certain place and time. So, this passage describes the weather.",
  "split":"val"
}
