# Supplementary material
Source: ML conference proceedings conference paper supplement (https://proceedings.neurips.cc/paper_files/paper/2022/hash/11332b6b6cf4485b84afadb1352d3a9a-Abstract.html)
Supplement: Supplementary file 1 [file 11332b6b6cf4485b84afadb1352d3a9a-Supplemental-Conference.zip › ScienceQA_Supplementary_Material/explore/data_examples/173/data.json]

{
  "question":"What does the allusion in this text suggest?\nTyler seems to have the Midas touch. Without any special experience or training, he launched a thriving business and then established a well-respected charity.",
  "choices":[
    "Tyler is successful at all that he does.",
    "Tyler has a hands-on approach to his work."
  ],
  "answer":0,
  "hint":"",
  "image":null,
  "task":"closed choice",
  "grade":"grade8",
  "subject":"language science",
  "topic":"figurative-language",
  "category":"Literary devices",
  "skill":"Interpret figures of speech",
  "lecture":"Figures of speech are words or phrases that use language in a nonliteral or unusual way. They can make writing more expressive.\nAn allusion is a brief reference to something or someone well known, often from history or literature.\n\"I'd better get home before I turn into a pumpkin!\" Lila remarked.",
  "solution":"The text uses an allusion, a brief reference to someone or something well known.\nThe allusion the Midas touch suggests that Tyler is successful at all that he does. In Greek mythology, King Midas has the power to turn anything he touches into gold, easily creating value from nothing.",
  "split":"val"
}
