# Supplementary material
Source: ML conference proceedings conference paper supplement (https://proceedings.neurips.cc/paper_files/paper/2022/hash/11332b6b6cf4485b84afadb1352d3a9a-Abstract.html)
Supplement: Supplementary file 1 [file 11332b6b6cf4485b84afadb1352d3a9a-Supplemental-Conference.zip › ScienceQA_Supplementary_Material/explore/data_examples/178/data.json]

{
  "question":"Which is a complex sentence?",
  "choices":[
    "According to many scholars, the 1798 publication of Lyrical Ballads by Samuel Taylor Coleridge and William Wordsworth began the romantic period in English literature.",
    "Although presidential elections take place in early November, a president's term does not begin until the end of January."
  ],
  "answer":1,
  "hint":"",
  "image":null,
  "task":"closed choice",
  "grade":"grade6",
  "subject":"language science",
  "topic":"grammar",
  "category":"Sentences, fragments, and run-ons",
  "skill":"Is the sentence simple, compound, or complex?",
  "lecture":"A clause is a group of words that contains both a subject and a predicate.\nAn independent clause is a complete thought. It can stand alone as a sentence. A dependent clause is not a complete thought. It cannot stand alone as a sentence.\nthe oranges on our tree are ripe\nThe clause can stand alone. It is independent.\nafter we pick up Kevin from work\nThe clause cannot stand alone. It is dependent.\nA simple sentence is made up of a single independent clause.\nBen and I spent all day relaxing by the pool.\nSome simple sentences have introductory phrases, but the introductory phrase is part of the predicate.\nIn the winter, Ben usually wears his heavy coat.\nBen usually wears his heavy coat in the winter.\nA compound sentence is made up of two independent clauses joined by a coordinating conjunction such as and, but, or, or so.\nWe saw a flash of lightning, and seconds later we heard the rumble of thunder.\nA complex sentence is made up of an independent clause and a dependent clause. The dependent clause usually begins with a subordinating conjunction such as after, although, as, because, before, if, since, unless, until, when, or while.\nIf she ever gets the chance, Terri would love to visit the Egyptian pyramids.",
  "solution":"The first sentence is the complex sentence. It is made up of an independent clause and a dependent clause. The dependent clause begins with the subordinating conjunction although.\nAlthough presidential elections take place in early November, a president's term does not begin until the end of January.",
  "split":"val"
}
