# Supplementary material
Source: ML conference proceedings conference paper supplement (https://proceedings.neurips.cc/paper_files/paper/2022/hash/11332b6b6cf4485b84afadb1352d3a9a-Abstract.html)
Supplement: Supplementary file 1 [file 11332b6b6cf4485b84afadb1352d3a9a-Supplemental-Conference.zip › ScienceQA_Supplementary_Material/explore/data_examples/206/data.json]

{
  "question":"Is the following statement about our solar system true or false?\nThe volume of Mars is more than three times as large as Mercury's.",
  "choices":[
    "false",
    "true"
  ],
  "answer":0,
  "hint":"Use the data to answer the question below.",
  "image":"image.png",
  "task":"true-or false",
  "grade":"grade6",
  "subject":"natural science",
  "topic":"earth-science",
  "category":"Astronomy",
  "skill":"Analyze data to compare properties of planets",
  "lecture":"A planet's volume tells you the size of the planet.\nThe primary composition of a planet is what the planet is made mainly of. In our solar system, planets are made mainly of rock, gas, or ice.",
  "solution":"To determine if this statement is true, calculate the value of three times the volume of Mercury.\nThen compare the result to the volume of Mars. The volume of Mars is 160 billion km^3, which is less than 180 billion km^3. So, the volume of Mars is less than three times as large as Mercury's.",
  "split":"val"
}
