# Supplementary material
Source: ML conference proceedings conference paper supplement (https://proceedings.neurips.cc/paper_files/paper/2022/hash/11332b6b6cf4485b84afadb1352d3a9a-Abstract.html)
Supplement: Supplementary file 1 [file 11332b6b6cf4485b84afadb1352d3a9a-Supplemental-Conference.zip › ScienceQA_Supplementary_Material/explore/data_examples/213/data.json]

{
  "question":"Which word does not rhyme?",
  "choices":[
    "slide",
    "ride",
    "made"
  ],
  "answer":2,
  "hint":"",
  "image":null,
  "task":"closed choice",
  "grade":"grade2",
  "subject":"language science",
  "topic":"phonological-awareness",
  "category":"Rhyming",
  "skill":"Which word does not rhyme?",
  "lecture":"Rhyming words are words that end with the same sound.\nThe words tip and slip rhyme. They both end with the same sound.\nThe words meet and treat also rhyme. They both end with the same sound, even though the sound has two different spellings.\nThe words tip and meet don't rhyme. They end with different sounds.",
  "solution":"The words slide and ride rhyme. They both end with the ide sound.\nThe word made does not rhyme. It ends with a different sound.",
  "split":"val"
}
