# Supplementary material
Source: ML conference proceedings conference paper supplement (https://proceedings.neurips.cc/paper_files/paper/2022/hash/11332b6b6cf4485b84afadb1352d3a9a-Abstract.html)
Supplement: Supplementary file 1 [file 11332b6b6cf4485b84afadb1352d3a9a-Supplemental-Conference.zip › ScienceQA_Supplementary_Material/explore/data_examples/240/data.json]

{
  "question":"What do these two changes have in common?\ncooking a pancake\nrust forming on a bicycle frame",
  "choices":[
    "Both are caused by heating.",
    "Both are caused by cooling.",
    "Both are only physical changes.",
    "Both are chemical changes."
  ],
  "answer":3,
  "hint":"",
  "image":null,
  "task":"closed choice",
  "grade":"grade4",
  "subject":"natural science",
  "topic":"chemistry",
  "category":"Physical and chemical change",
  "skill":"Compare physical and chemical changes",
  "lecture":"Chemical changes and physical changes are two common ways matter can change.\nIn a chemical change, the type of matter changes. The types of matter before and after a chemical change are always different.\nSome chemical changes are caused by heating or cooling. For example, burning a piece of paper is a chemical change caused by heating. When paper gets hot enough, it re\u00adacts with oxygen in the air and burns. The paper and oxygen change into ash and smoke.\nIn a physical change, the type of matter stays the same. The types of matter before and after a physical change are always the same.\nA change of state is a type of physical change. Changes of state can be caused by heating or cooling. For example, ice melting is a physical change that can be caused by heating. Ice and liquid water are made of the same type of matter: water.\nThe law of conservation of mass says that all physical and chemical changes conserve mass. Conserve means to keep the same. So, the total mass before a physical or chemical change is equal to the total mass after the change.",
  "solution":"Step 1: Think about each change.\nCooking a pancake is a chemical change. Pancakes are made from pancake batter. A cooked pancake is a different type of matter than pancake batter. Pancake batter is wet and slippery. Cooked pancakes are fluffy and can be good to eat!\nRust forming on a bicycle frame is a chemical change. Oxygen in the air reacts with iron in the bicycle frame. The outside of the frame turns into a different type of matter called rust. Rust is reddish-brown and falls apart easily.\nStep 2: Look at each answer choice.\nBoth are only physical changes.\nBoth changes are chemical changes. They are not physical changes.\nBoth are chemical changes.\nBoth changes are chemical changes. The type of matter before and after each change is different.\nBoth are caused by heating.\nCooking is caused by heating. But rust forming on a bicycle frame is not.\nBoth are caused by cooling.\nNeither change is caused by cooling.",
  "split":"val"
}
