# Supplementary material
Source: ML conference proceedings conference paper supplement (https://proceedings.neurips.cc/paper_files/paper/2022/hash/11332b6b6cf4485b84afadb1352d3a9a-Abstract.html)
Supplement: Supplementary file 1 [file 11332b6b6cf4485b84afadb1352d3a9a-Supplemental-Conference.zip › ScienceQA_Supplementary_Material/explore/data_examples/241/data.json]

{
  "question":"Select the one animal that has all of the bird traits listed above.",
  "choices":[
    "Burmese pythons hatch from eggs with shells. They can grow to over 12 feet long! Their scaly, waterproof skin is brown and black.",
    "Peregrine falcons are the fastest animals in the world! They use their wings to fly quickly and hunt prey. Peregrine falcons also have a beak and feathers. They hatch from eggs with speckled or spotted shells."
  ],
  "answer":1,
  "hint":"Birds are a group of animals with similar traits. The following traits can be used to identify birds:\nThey have feathers.\nThey have wings.\nThey have a beak.\nThey make eggs with shells. Observe the animals and read the descriptions.",
  "image":null,
  "task":"closed choice",
  "grade":"grade4",
  "subject":"natural science",
  "topic":"biology",
  "category":"Classification",
  "skill":"Use evidence to classify mammals, birds, fish, reptiles, and amphibians",
  "lecture":"Scientists sort animals with similar traits into groups. This is called classification. Classification helps scientists learn about how animals live.\nHow do scientists classify animals? First, they make observations about an animal. Scientists observe the animal's traits, including its body parts and behavior. Then, scientists compare the animal's traits to other animals' traits. Scientists classify animals with similar traits into a group.",
  "solution":"To decide if an animal is part of a group, look at the traits of the group.\nBirds have the following traits:\nThey have feathers.\nThey have wings.\nThey have a beak.\nThey make eggs with shells.\nCompare each animal's traits to the group's traits. Select the animal with traits similar to the group's traits.\nA Burmese python has the following traits:\nIt has scaly, waterproof skin.\nIt makes eggs with shells.\nA Burmese python does not have all of the traits of a bird. A Burmese python is a reptile.\nA peregrine falcon has the following traits:\nIt has feathers.\nIt has wings.\nIt has a beak.\nIt makes eggs with shells.\nA peregrine falcon has the traits of a bird. A peregrine falcon is a bird.",
  "split":"val"
}
