# Supplementary material
Source: ML conference proceedings conference paper supplement (https://proceedings.neurips.cc/paper_files/paper/2022/hash/11332b6b6cf4485b84afadb1352d3a9a-Abstract.html)
Supplement: Supplementary file 1 [file 11332b6b6cf4485b84afadb1352d3a9a-Supplemental-Conference.zip › ScienceQA_Supplementary_Material/explore/data_examples/247/data.json]

{
  "question":"Does this passage describe the weather or the climate?\nIt got down to 3\u00b0C in Athens, Greece, last night!",
  "choices":[
    "weather",
    "climate"
  ],
  "answer":0,
  "hint":"Hint: Weather is what the atmosphere is like at a certain place and time. Climate is the pattern of weather in a certain place.",
  "image":null,
  "task":"closed choice",
  "grade":"grade4",
  "subject":"natural science",
  "topic":"earth-science",
  "category":"Weather and climate",
  "skill":"What's the difference between weather and climate?",
  "lecture":"The atmosphere is the layer of air that surrounds Earth. Both weather and climate tell you about the atmosphere.\nWeather is what the atmosphere is like at a certain place and time. Weather can change quickly. For example, the temperature outside your house might get higher throughout the day.\nClimate is the pattern of weather in a certain place. For example, summer temperatures in New York are usually higher than winter temperatures.",
  "solution":"Read the text carefully.\nIt got down to 3\u00b0C in Athens, Greece, last night!\nThis passage tells you about the temperature in Athens last night. It describes the atmosphere at a certain place and time. So, this passage describes the weather.",
  "split":"val"
}
