# Supplementary material
Source: ML conference proceedings conference paper supplement (https://proceedings.neurips.cc/paper_files/paper/2022/hash/11332b6b6cf4485b84afadb1352d3a9a-Abstract.html)
Supplement: Supplementary file 1 [file 11332b6b6cf4485b84afadb1352d3a9a-Supplemental-Conference.zip › ScienceQA_Supplementary_Material/explore/data_examples/249/data.json]

{
  "question":"Select the bird below.",
  "choices":[
    "gray tree frog",
    "pelican"
  ],
  "answer":1,
  "hint":"Birds have feathers, two wings, and a beak. A woodpecker is an example of a bird.",
  "image":"image.png",
  "task":"closed choice",
  "grade":"grade2",
  "subject":"natural science",
  "topic":"biology",
  "category":"Classification",
  "skill":"Identify mammals, birds, fish, reptiles, and amphibians",
  "lecture":"Birds, mammals, fish, reptiles, and amphibians are groups of animals. The animals in each group have traits in common.\nScientists sort animals into groups based on traits they have in common. This process is called classification.",
  "solution":"A pelican is a bird. It has feathers, two wings, and a beak.\nA gray tree frog is an amphibian. It has moist skin and begins its life in water.",
  "split":"val"
}
