# Supplementary material
Source: ML conference proceedings conference paper supplement (https://proceedings.neurips.cc/paper_files/paper/2022/hash/11332b6b6cf4485b84afadb1352d3a9a-Abstract.html)
Supplement: Supplementary file 1 [file 11332b6b6cf4485b84afadb1352d3a9a-Supplemental-Conference.zip › ScienceQA_Supplementary_Material/explore/data_examples/254/data.json]

{
  "question":"Which organizational structure does this text primarily use?",
  "choices":[
    "compare-contrast",
    "problem-solution"
  ],
  "answer":1,
  "hint":"Read the text.\nIn the 1970s, architect I. M. Pei took on the difficult assignment of renovating and updating the beautiful Louvre Palace in Paris without overpowering the original building. The art museum in the centuries-old Louvre displayed Leonardo DaVinci's Mona Lisa and other famous works, but the building's layout was so confusing that tourists couldn't find the entrances. It also needed more restrooms and a bigger cafeteria. Pei designed a large central underground entrance and visitor center. He then added a glass pyramid above the entryway. Although Pei's design faced initial criticism, today the pyramid is considered a brilliant success\u2014a landmark that complements the old palace without interfering with it.",
  "image":null,
  "task":"closed choice",
  "grade":"grade8",
  "subject":"language science",
  "topic":"writing-strategies",
  "category":"Text structure",
  "skill":"Identify text structures",
  "lecture":"Authors use different text structures to organize their ideas in writing. Learning to identify these structures will help you to understand the relationships between ideas in informational texts. You can also use these structures to organize your own writing.\nA cause-effect structure presents the causes and the effects of a particular event, trend, or situation. This structure often uses words and phrases such as because, since, as a result, due to, or consequently.\nA compare-contrast structure presents similarities (comparisons) and differences (contrasts) between two or more things. This structure often uses words and phrases such as like, similarly, or in the same way (for comparing) or on the other hand, in contrast, or unlike (for contrasting).\nA problem-solution structure presents a problem and suggests one or more possible solutions. This structure often uses words such as issue, question, puzzle, propose, and answer.\nA sequential structure describes a series of events that happens in a certain order. This structure often uses specific dates and times or words such as first, next, during, finally, and while.",
  "solution":"The text uses a problem-solution structure to show how architect I.M. Pei modernized the Louvre with an entrance that complemented the existing building. In the text, certain words and phrases help to organize ideas in a problem-solution structure. Notice the phrases difficult assignment and brilliant success.",
  "split":"val"
}
