# Supplementary material
Source: ML conference proceedings conference paper supplement (https://proceedings.neurips.cc/paper_files/paper/2022/hash/11332b6b6cf4485b84afadb1352d3a9a-Abstract.html)
Supplement: Supplementary file 1 [file 11332b6b6cf4485b84afadb1352d3a9a-Supplemental-Conference.zip › ScienceQA_Supplementary_Material/explore/data_examples/256/data.json]

{
  "question":"Which logical fallacy is used in the text?\nDon't ever get a ride from Mariana. Her brother has been driving for only six months, and he's already gotten three speeding tickets.",
  "choices":[
    "guilt by association: a negative association intended to discredit someone or something",
    "circular reasoning: an argument that supports a claim with the claim itself"
  ],
  "answer":0,
  "hint":"",
  "image":null,
  "task":"closed choice",
  "grade":"grade7",
  "subject":"language science",
  "topic":"writing-strategies",
  "category":"Developing and supporting arguments",
  "skill":"Classify logical fallacies",
  "lecture":"A strong argument uses valid reasoning and logic in support of a claim. When an argument or claim introduces irrelevant information or misrepresents the issues at hand, it may be committing a logical fallacy. Logical fallacies can hurt a writer's credibility and can lead readers to draw false conclusions.\nA logical fallacy may present irrelevant information:\nFallacy | Description\nad hominem | a personal attack meant to discredit one's opponent\nappeal to nature | an argument that assumes the natural choice is always the best choice\nbandwagon fallacy | an argument that assumes the popular choice is always the best choice\ncircular reasoning | an argument that supports a claim with the claim itself\nguilt by association | an unfair negative association with another person or group that is intended to discredit someone or something\nred herring | the use of a completely unrelated topic in support of a claim\nA logical fallacy may misrepresent the issues at hand:\nFallacy | Description\nfalse causation | the assumption that because two things happened together, one caused the other\nfalse dichotomy | an argument that presents only two choices when more options exist\nhasty generalization | a very broad claim based on very little evidence\nstraw man | a misrepresentation of an opponent's position that makes it easier to argue against\n",
  "solution":"The text argues that Mariana must be a reckless driver, because her brother is a reckless driver. However, even though Mariana's brother is reckless, that doesn't necessarily mean that Mariana is, too. This illustrates a type of logical fallacy known as guilt by association.",
  "split":"val"
}
