# Supplementary material
Source: ML conference proceedings conference paper supplement (https://proceedings.neurips.cc/paper_files/paper/2022/hash/11332b6b6cf4485b84afadb1352d3a9a-Abstract.html)
Supplement: Supplementary file 1 [file 11332b6b6cf4485b84afadb1352d3a9a-Supplemental-Conference.zip › ScienceQA_Supplementary_Material/explore/data_examples/257/data.json]

{
  "question":"Which bird's beak is also adapted to crack large, hard nuts?",
  "choices":[
    "blue rock pigeon",
    "Alexandrine parakeet"
  ],
  "answer":1,
  "hint":"Scarlet macaws live in the forests of Central and South America. They eat large seeds and nuts. The shape of the 's beak is adapted to crack open large, hard nuts.\nFigure: scarlet macaw.",
  "image":"image.png",
  "task":"closed choice",
  "grade":"grade4",
  "subject":"natural science",
  "topic":"biology",
  "category":"Adaptations",
  "skill":"Animal adaptations: beaks, mouths, and necks",
  "lecture":"An adaptation is an inherited trait that helps an organism survive or reproduce. Adaptations can include both body parts and behaviors.\nThe shape of a bird's beak is one example of an adaptation. Birds' beaks can be adapted in different ways. For example, a sharp hooked beak might help a bird tear through meat easily. A short, thick beak might help a bird break through a seed's hard shell. Birds that eat similar food often have similar beaks.",
  "solution":"Look at the picture of the scarlet macaw.\nThe scarlet macaw has a thick hooked beak. Its beak is adapted to crack large, hard nuts. The scarlet macaw uses its thick beak to crack the shell of a nut by squeezing it. The hooked shape of the beak can help the bird hold the nut in place while cracking it.\nNow look at each bird. Figure out which bird has a similar adaptation.\nThe Alexandrine parakeet has a thick hooked beak. Its beak is adapted to crack large, hard nuts.\nThe blue rock pigeon has a short, thin beak. Its beak is not adapted to crack large, hard nuts.",
  "split":"val"
}
