# Supplementary material
Source: ML conference proceedings conference paper supplement (https://proceedings.neurips.cc/paper_files/paper/2022/hash/11332b6b6cf4485b84afadb1352d3a9a-Abstract.html)
Supplement: Supplementary file 1 [file 11332b6b6cf4485b84afadb1352d3a9a-Supplemental-Conference.zip › ScienceQA_Supplementary_Material/explore/data_examples/258/data.json]

{
  "question":"Complete the sentence.\n is what happens when pollen lands on a female cone.",
  "choices":[
    "Fertilization",
    "Pollination",
    "Photosynthesis"
  ],
  "answer":1,
  "hint":"Male cones make pollen. Wind can blow pollen from a male cone to a female cone.",
  "image":"image.png",
  "task":"closed choice",
  "grade":"grade4",
  "subject":"natural science",
  "topic":"biology",
  "category":"Plants",
  "skill":"Describe and construct conifer life cycles",
  "lecture":"Conifers are plants that grow cones. Conifers use their cones to reproduce, or make new plants like themselves. How do conifers use their cones to reproduce?\nConifers can grow male and female cones. Male cones make pollen, and female cones make eggs. Pollination is what happens when wind blows pollen from male cones onto female cones. After pollination, sperm from the pollen can combine with eggs. This is called fertilization. The fertilized eggs grow into seeds.\nThe seeds can fall out of the cones and land on the ground. When a seed lands on the ground, it can germinate, or start to grow into a new plant.",
  "solution":"When pollen lands on a female cone, it is called pollination. This photograph shows wind blowing pollen from the male cones on a Japanese cedar tree.\nPhotosynthesis happens when plants use water, carbon dioxide, and energy from sunlight to make sugar.",
  "split":"val"
}
