# Supplementary material
Source: ML conference proceedings conference paper supplement (https://proceedings.neurips.cc/paper_files/paper/2022/hash/11332b6b6cf4485b84afadb1352d3a9a-Abstract.html)
Supplement: Supplementary file 1 [file 11332b6b6cf4485b84afadb1352d3a9a-Supplemental-Conference.zip › ScienceQA_Supplementary_Material/explore/data_examples/262/data.json]

{
  "question":"Which property do these three objects have in common?",
  "choices":[
    "stretchy",
    "transparent",
    "rough"
  ],
  "answer":0,
  "hint":"Select the best answer.",
  "image":"image.png",
  "task":"closed choice",
  "grade":"grade4",
  "subject":"natural science",
  "topic":"physics",
  "category":"Materials",
  "skill":"Compare properties of objects",
  "lecture":"An object has different properties. A property of an object can tell you how it looks, feels, tastes, or smells. Properties can also tell you how an object will behave when something happens to it.\nDifferent objects can have properties in common. You can use these properties to put objects into groups. Grouping objects by their properties is called classification.",
  "solution":"Look at each object.\nFor each object, decide if it has that property.\nYou can see clearly through a transparent object. None of the objects are transparent.\nA stretchy object gets longer when you pull on it. All three objects are stretchy.\nA rough object feels scratchy when you touch it. The bubble gum and the rubber band are not rough.\nThe property that all three objects have in common is stretchy.",
  "split":"val"
}
