# Supplementary material
Source: ML conference proceedings conference paper supplement (https://proceedings.neurips.cc/paper_files/paper/2022/hash/11332b6b6cf4485b84afadb1352d3a9a-Abstract.html)
Supplement: Supplementary file 1 [file 11332b6b6cf4485b84afadb1352d3a9a-Supplemental-Conference.zip › ScienceQA_Supplementary_Material/explore/data_examples/263/data.json]

{
  "question":"Which term matches the picture?",
  "choices":[
    "chemical change",
    "physical change"
  ],
  "answer":1,
  "hint":"Read the text.\nWhen a substance goes through a physical change, its form or shape changes, but its chemical composition does not. For example, when water freezes and becomes a solid, its form changes, but it is still made up of the same molecules. In a chemical change, by contrast, one or more of the molecules in a substance changes. For example, when vinegar is mixed with baking soda, water and carbon dioxide molecules form.",
  "image":"image.png",
  "task":"closed choice",
  "grade":"grade6",
  "subject":"language science",
  "topic":"vocabulary",
  "category":"Context clues",
  "skill":"Determine the meaning of domain-specific words with pictures",
  "lecture":"",
  "solution":"When water melts, it goes through a physical change. The substance changes from a solid to a liquid.",
  "split":"val"
}
