# Supplementary material
Source: ML conference proceedings conference paper supplement (https://proceedings.neurips.cc/paper_files/paper/2022/hash/11332b6b6cf4485b84afadb1352d3a9a-Abstract.html)
Supplement: Supplementary file 1 [file 11332b6b6cf4485b84afadb1352d3a9a-Supplemental-Conference.zip › ScienceQA_Supplementary_Material/explore/data_examples/265/data.json]

{
  "question":"Is Chelonoidis nigra made up of many cells?",
  "choices":[
    "no",
    "yes"
  ],
  "answer":1,
  "hint":"This organism is Chelonoidis nigra. It is a member of the animal kingdom.\nChelonoidis nigra is commonly called a Gal\u00e1pagos giant tortoise. These large tortoises live on the Gal\u00e1pagos Islands. When Spanish sailors arrived at these islands in the 1530s, about 200,000 Gal\u00e1pagos giant tortoises lived on the islands. The Spanish sailors named the islands after a Spanish word for tortoise, gal\u00e1pago.",
  "image":"image.png",
  "task":"yes or no",
  "grade":"grade4",
  "subject":"natural science",
  "topic":"biology",
  "category":"Classification",
  "skill":"Describe, classify, and compare kingdoms",
  "lecture":"In the past, scientists classified living organisms into two groups: plants and animals. Over the past 300 years, scientists have discovered many more types of organisms. Today, many scientists classify organisms into six broad groups, called kingdoms.\nOrganisms in each kingdom have specific traits. The table below shows some traits used to describe each kingdom.\n | Bacteria | Archaea | Protists | Fungi | Animals | Plants\nHow many cells do they have? | one | one | one or many | one or many | many | many\nDo their cells have a nucleus? | no | no | yes | yes | yes | yes\nCan their cells make food? | some species can | some species can | some species can | no | no | yes",
  "solution":"Chelonoidis nigra is an animal. Animals are made up of many cells.",
  "split":"val"
}
