# Supplementary material
Source: ML conference proceedings conference paper supplement (https://proceedings.neurips.cc/paper_files/paper/2022/hash/11332b6b6cf4485b84afadb1352d3a9a-Abstract.html)
Supplement: Supplementary file 1 [file 11332b6b6cf4485b84afadb1352d3a9a-Supplemental-Conference.zip › ScienceQA_Supplementary_Material/explore/data_examples/274/data.json]

{
  "question":"Which greeting is correct for a letter?",
  "choices":[
    "Dear dr. hoffman,",
    "Dear Dr. Hoffman,"
  ],
  "answer":1,
  "hint":"",
  "image":null,
  "task":"closed choice",
  "grade":"grade3",
  "subject":"language science",
  "topic":"punctuation",
  "category":"Formatting",
  "skill":"Greetings and closings of letters",
  "lecture":"A letter starts with a greeting and ends with a closing. For each one, capitalize the first word and end with a comma. You should also capitalize proper nouns, such as Aunt Sue.\nDear Aunt Sue,\nI'm glad you could come to my party, and\nthank you for the birthday gift. I could not have\nasked for a better one! Every time I see it, I think\nof you.\nWith love,\nRory",
  "solution":"The second greeting is correct:\nIts first word is capitalized, and it ends with a comma. Dr. Hoffman is capitalized because it is a proper noun.",
  "split":"val"
}
