# Supplementary material
Source: ML conference proceedings conference paper supplement (https://proceedings.neurips.cc/paper_files/paper/2022/hash/11332b6b6cf4485b84afadb1352d3a9a-Abstract.html)
Supplement: Supplementary file 1 [file 11332b6b6cf4485b84afadb1352d3a9a-Supplemental-Conference.zip › ScienceQA_Supplementary_Material/explore/data_examples/278/data.json]

{
  "question":"What is the name of the colony shown?",
  "choices":[
    "New Hampshire",
    "Iowa",
    "Massachusetts",
    "Vermont"
  ],
  "answer":0,
  "hint":"",
  "image":"image.png",
  "task":"closed choice",
  "grade":"grade8",
  "subject":"social science",
  "topic":"us-history",
  "category":"Colonial America",
  "skill":"Identify the Thirteen Colonies",
  "lecture":"",
  "solution":"The colony is New Hampshire.\nDuring the colonial era, New Hampshire and New York both claimed the territory that would later become the state of Vermont. Vermont was never its own colony.",
  "split":"val"
}
