# Supplementary material
Source: ML conference proceedings conference paper supplement (https://proceedings.neurips.cc/paper_files/paper/2022/hash/11332b6b6cf4485b84afadb1352d3a9a-Abstract.html)
Supplement: Supplementary file 1 [file 11332b6b6cf4485b84afadb1352d3a9a-Supplemental-Conference.zip › ScienceQA_Supplementary_Material/explore/data_examples/281/data.json]

{
  "question":"Based on this information, what is Chanel's phenotype for the fur length trait?",
  "choices":[
    "short fur",
    "long fur"
  ],
  "answer":0,
  "hint":"In a group of cats, some individuals have short fur and others have long fur. In this group, the gene for the fur length trait has two alleles. The allele for short fur (F) is dominant over the allele for long fur (f).\nChanel is a cat from this group. Chanel has the homozygous genotype FF for the fur length gene.",
  "image":null,
  "task":"closed choice",
  "grade":"grade6",
  "subject":"natural science",
  "topic":"biology",
  "category":"Genes to traits",
  "skill":"Genetics vocabulary: dominant and recessive",
  "lecture":"All organisms have pieces of hereditary material called genes, which are passed from parents to offspring. Genes contain instructions for building the parts of an organism. An organism's genes affect its observable traits, including its appearance, its behavior, and which diseases it may have. Genes may have different alleles, or forms, that can cause different versions of a trait.\nFor example, flower color is a trait in pea plants. The gene for this trait has two possible alleles. Each allele is represented by an uppercase or lowercase letter. The allele F is for purple flowers, and the allele f is for white flowers. Each pea plant has two alleles for the flower color gene\u2014one allele inherited from each parent.\nAn organism's genotype for a gene is its combination of alleles for that gene. So, a pea plant may have a genotype of FF, Ff, or ff for the flower color gene.\nAn organism's phenotype for a trait is its observable version of that trait, which depends on the organism's combination of alleles. A pea plant may have a phenotype of purple flowers or white flowers for the flower color trait.\nSome traits, like flower color in pea plants, are controlled by a single gene. Most plants and animals have a genotype made up of two alleles for these traits. These two alleles determine whether an organism is homozygous or heterozygous for the gene.\nAn organism with two identical alleles for a gene is homozygous for that gene. A pea plant with the genotype FF or ff is homozygous for the flower color gene.\nAn organism with two different alleles for a gene is heterozygous for that gene. A pea plant with the genotype Ff is heterozygous for the flower color gene.\nThe types of alleles in an organism's genotype determine the organism's phenotype. Some alleles have types called dominant and recessive. These two types can cause different versions of a trait to appear as the organism's phenotype.\nA dominant allele causes its version of the trait to appear even when the organism also has a recessive allele for the gene. In pea plants, the F allele, which causes purple flowers, is dominant over the f allele. A pea plant with at least one F allele will have the F allele's version of the flower color trait. So, a plant with the genotype FF or Ff will have purple flowers.\nA recessive allele causes its version of the trait to appear only when the organism does not have any dominant alleles for the gene. In pea plants, the f allele, which causes white flowers, is recessive to the F allele. A pea plant with only f alleles will have the f allele's version of the flower color trait. So, a plant with the genotype ff will have white flowers.",
  "solution":"Chanel's genotype for the fur length gene is FF. Chanel's genotype of FF has only F allelles. The F allele is for short fur. So, Chanel's phenotype for the fur length trait must be short fur.\nTo check this answer, consider whether Chanel's alleles are dominant or recessive. The allele for short fur (F) is dominant over the allele for long fur (f). This means F is a dominant allele, and f is a recessive allele.\nChanel's genotype of FF has two dominant alleles. An organism with at least one dominant allele for a gene will have the dominant allele's version of the trait. So, Chanel's phenotype for the fur length trait must be short fur.",
  "split":"val"
}
