# Supplementary material
Source: ML conference proceedings conference paper supplement (https://proceedings.neurips.cc/paper_files/paper/2022/hash/11332b6b6cf4485b84afadb1352d3a9a-Abstract.html)
Supplement: Supplementary file 1 [file 11332b6b6cf4485b84afadb1352d3a9a-Supplemental-Conference.zip › ScienceQA_Supplementary_Material/explore/data_examples/290/data.json]

{
  "question":"Which organ coordinates muscle movement?",
  "choices":[
    "lungs",
    "heart",
    "skeleton",
    "brain"
  ],
  "answer":3,
  "hint":"",
  "image":null,
  "task":"closed choice",
  "grade":"grade5",
  "subject":"natural science",
  "topic":"biology",
  "category":"Animals",
  "skill":"Human organs and their functions",
  "lecture":"",
  "solution":"",
  "split":"val"
}
