# Supplementary material
Source: ML conference proceedings conference paper supplement (https://proceedings.neurips.cc/paper_files/paper/2022/hash/11332b6b6cf4485b84afadb1352d3a9a-Abstract.html)
Supplement: Supplementary file 1 [file 11332b6b6cf4485b84afadb1352d3a9a-Supplemental-Conference.zip › ScienceQA_Supplementary_Material/explore/data_examples/299/data.json]

{
  "question":"Select the vertebrate.",
  "choices":[
    "black widow spider",
    "bull ant",
    "Yangtze alligator",
    "atlas moth"
  ],
  "answer":2,
  "hint":"Hint: Mammals, birds, fish, reptiles, and amphibians are vertebrates.",
  "image":null,
  "task":"closed choice",
  "grade":"grade4",
  "subject":"natural science",
  "topic":"biology",
  "category":"Classification",
  "skill":"Identify vertebrates and invertebrates",
  "lecture":"Vertebrates and invertebrates are both groups of animals.\nA vertebrate has a backbone. The backbone is made of many bones in an animal's back. A vertebrate's backbone helps connect the different parts of its body. In the drawings below, each vertebrate's backbone is colored orange.\nAn invertebrate does not have a backbone. In fact, invertebrates do not have any bones! Some invertebrates have an outer cover on their body called an exoskeleton. Other invertebrates have a soft body.",
  "solution":"A bull ant is an insect. Like other insects, a bull ant is an invertebrate. It does not have a backbone. It has an exoskeleton.\nA Yangtze alligator is a reptile. Like other reptiles, a Yangtze alligator is a vertebrate. It has a backbone.\nAn atlas moth is an insect. Like other insects, an atlas moth is an invertebrate. It does not have a backbone. It has an exoskeleton.\nLike other spiders, a black widow spider is an invertebrate. It does not have a backbone. It has an exoskeleton.",
  "split":"val"
}
