# Supplementary material
Source: ML conference proceedings conference paper supplement (https://proceedings.neurips.cc/paper_files/paper/2022/hash/11332b6b6cf4485b84afadb1352d3a9a-Abstract.html)
Supplement: Supplementary file 1 [file 11332b6b6cf4485b84afadb1352d3a9a-Supplemental-Conference.zip › ScienceQA_Supplementary_Material/explore/data_examples/302/data.json]

{
  "question":"Which object has the least thermal energy?",
  "choices":[
    "a bowl of oatmeal at a temperature of 28\u00b0C",
    "a bowl of oatmeal at a temperature of 22\u00b0C",
    "a bowl of oatmeal at a temperature of 41\u00b0C"
  ],
  "answer":1,
  "hint":"The objects are identical except for their temperatures.",
  "image":null,
  "task":"closed choice",
  "grade":"grade4",
  "subject":"natural science",
  "topic":"physics",
  "category":"Heat and thermal energy",
  "skill":"How is temperature related to thermal energy?",
  "lecture":"All solids, liquids, and gases are made of matter. Matter is made up of tiny particles that are always moving. The energy from the motion of these particles is called thermal energy.\nTemperature measures how hot or cold matter is. If the particles in matter slow down, the temperature goes down. The matter now has both less thermal energy and a lower temperature.",
  "solution":"All three bowls of oatmeal have the same mass but different temperatures. Since the 22\u00b0C bowl of oatmeal is the coldest, it has the least thermal energy.",
  "split":"val"
}
