# Supplementary material
Source: ML conference proceedings conference paper supplement (https://proceedings.neurips.cc/paper_files/paper/2022/hash/11332b6b6cf4485b84afadb1352d3a9a-Abstract.html)
Supplement: Supplementary file 1 [file 11332b6b6cf4485b84afadb1352d3a9a-Supplemental-Conference.zip › ScienceQA_Supplementary_Material/explore/data_examples/309/data.json]

{
  "question":"Compare the average kinetic energies of the particles in each sample. Which sample has the higher temperature?",
  "choices":[
    "sample A",
    "neither; the samples have the same temperature",
    "sample B"
  ],
  "answer":0,
  "hint":"The diagrams below show two pure samples of gas in identical closed, rigid containers. Each colored ball represents one gas particle. Both samples have the same number of particles.",
  "image":"image.png",
  "task":"closed choice",
  "grade":"grade6",
  "subject":"natural science",
  "topic":"physics",
  "category":"Particle motion and energy",
  "skill":"Identify how particle motion affects temperature and pressure",
  "lecture":"The temperature of a substance depends on the average kinetic energy of the particles in the substance. The higher the average kinetic energy of the particles, the higher the temperature of the substance.\nThe kinetic energy of a particle is determined by its mass and speed. For a pure substance, the greater the mass of each particle in the substance and the higher the average speed of the particles, the higher their average kinetic energy.",
  "solution":"Each particle in the two samples has the same mass, but the particles in sample A have a higher average speed than the particles in sample B. So, the particles in sample A have a higher average kinetic energy than the particles in sample B.\nBecause the particles in sample A have the higher average kinetic energy, sample A must have the higher temperature.",
  "split":"val"
}
