# Supplementary material
Source: ML conference proceedings conference paper supplement (https://proceedings.neurips.cc/paper_files/paper/2022/hash/11332b6b6cf4485b84afadb1352d3a9a-Abstract.html)
Supplement: Supplementary file 1 [file 11332b6b6cf4485b84afadb1352d3a9a-Supplemental-Conference.zip › ScienceQA_Supplementary_Material/explore/data_examples/317/data.json]

{
  "question":"Does this passage describe the weather or the climate?",
  "choices":[
    "weather",
    "climate"
  ],
  "answer":1,
  "hint":"Figure: Oklahoma.\nLarge thunderstorms, called supercells, often bring large clouds. Oklahoma often experiences violent storms during the summer months.\nHint: Weather is what the atmosphere is like at a certain place and time. Climate is the pattern of weather in a certain place.",
  "image":"image.png",
  "task":"closed choice",
  "grade":"grade6",
  "subject":"natural science",
  "topic":"earth-science",
  "category":"Weather and climate",
  "skill":"Weather and climate around the world",
  "lecture":"The atmosphere is the layer of air that surrounds Earth. Both weather and climate tell you about the atmosphere.\nWeather is what the atmosphere is like at a certain place and time. Weather can change quickly. For example, the temperature outside your house might get higher throughout the day.\nClimate is the pattern of weather in a certain place. For example, summer temperatures in New York are usually higher than winter temperatures.",
  "solution":"Read the passage carefully.\nLarge thunderstorms, called supercells, often bring large clouds. Oklahoma often experiences violent storms during the summer months.\nThe underlined part of the passage tells you about the usual pattern of cloud cover in Oklahoma. This passage does not describe what the weather is like on a particular day. So, this passage describes the climate.",
  "split":"val"
}
