# Supplementary material
Source: ML conference proceedings conference paper supplement (https://proceedings.neurips.cc/paper_files/paper/2022/hash/11332b6b6cf4485b84afadb1352d3a9a-Abstract.html)
Supplement: Supplementary file 1 [file 11332b6b6cf4485b84afadb1352d3a9a-Supplemental-Conference.zip › ScienceQA_Supplementary_Material/explore/data_examples/323/data.json]

{
  "question":"Identify the question that Rob's experiment can best answer.",
  "choices":[
    "Do steel nails rust in fewer days when submerged in a large volume of liquid compared to a small volume?",
    "Do steel nails take fewer days to rust in water compared to vinegar?"
  ],
  "answer":1,
  "hint":"The passage below describes an experiment. Read the passage and then follow the instructions below.\n\nRob put one two-inch steel nail into each of six test tubes. He added water to three of the test tubes and vinegar to the other three. In each test tube, he completely covered the nail with the same volume of liquid. Rob checked the nails for rust at the same time every day. He recorded how many days it took each nail to become completely covered in rust. Then, he compared the number of days it took nails to rust in water to the number of days it took nails to rust in vinegar.\nFigure: a new steel nail on a pile of rusty nails.",
  "image":"image.png",
  "task":"closed choice",
  "grade":"grade6",
  "subject":"natural science",
  "topic":"science-and-engineering-practices",
  "category":"Designing experiments",
  "skill":"Identify the experimental question",
  "lecture":"Experiments can be designed to answer specific questions. How can you identify the questions that a certain experiment can answer? In order to do this, you need to figure out what was tested and what was measured during the experiment.\nImagine an experiment with two groups of daffodil plants. One group of plants was grown in sandy soil, and the other was grown in clay soil. Then, the height of each plant was measured.\nFirst, identify the part of the experiment that was tested. The part of an experiment that is tested usually involves the part of the experimental setup that is different or changed. In the experiment described above, each group of plants was grown in a different type of soil. So, the effect of growing plants in different soil types was tested.\nThen, identify the part of the experiment that was measured. The part of the experiment that is measured may include measurements and calculations. In the experiment described above, the heights of the plants in each group were measured.\nExperiments can answer questions about how the part of the experiment that is tested affects the part that is measured. So, the experiment described above can answer questions about how soil type affects plant height.\nExamples of questions that this experiment can answer include:\nDoes soil type affect the height of daffodil plants?\nDo daffodil plants in sandy soil grow taller than daffodil plants in clay soil?\nAre daffodil plants grown in sandy soil shorter than daffodil plants grown in clay soil?",
  "solution":"",
  "split":"val"
}
