# Supplementary material
Source: ML conference proceedings conference paper supplement (https://proceedings.neurips.cc/paper_files/paper/2022/hash/11332b6b6cf4485b84afadb1352d3a9a-Abstract.html)
Supplement: Supplementary file 1 [file 11332b6b6cf4485b84afadb1352d3a9a-Supplemental-Conference.zip › ScienceQA_Supplementary_Material/explore/data_examples/326/data.json]

{
  "question":"Based on the bubble map, what does the quotation \"Vanity, not love, has been my folly\" show?",
  "choices":[
    "Darcy is stubborn.",
    "Elizabeth is judgmental."
  ],
  "answer":1,
  "hint":"This bubble map shows traits of characters from Pride and Prejudice by Jane Austen. It also includes quotations from the characters that show these traits.",
  "image":"image.png",
  "task":"closed choice",
  "grade":"grade6",
  "subject":"language science",
  "topic":"writing-strategies",
  "category":"Visual elements",
  "skill":"Read graphic organizers",
  "lecture":"A graphic organizer is a chart or picture that shows how ideas, facts, or topics are related to one another.\nWhen you read, look for graphic organizers included in the text. You can use these images to find key information. You can also create your own graphic organizers with information that you've read. Doing this can help you think about the ideas in the text and easily review them.\nWhen you write, you can use graphic organizers to organize your thoughts and plan your writing.",
  "solution":"A bubble map uses lines or arrows to connect things that are related. This bubble map shows traits of characters from Pride and Prejudice by Jane Austen. It also includes quotations from the characters that show these traits.\nFind the quotation \"Vanity, not love, has been my folly\" in the bubble map. It is directly connected to judgmental, which is directly connected to Elizabeth. So, the quotation shows that Elizabeth is judgmental.",
  "split":"val"
}
