# Supplementary material
Source: ML conference proceedings conference paper supplement (https://proceedings.neurips.cc/paper_files/paper/2022/hash/11332b6b6cf4485b84afadb1352d3a9a-Abstract.html)
Supplement: Supplementary file 1 [file 11332b6b6cf4485b84afadb1352d3a9a-Supplemental-Conference.zip › ScienceQA_Supplementary_Material/explore/data_examples/340/data.json]

{
  "question":"Which of these oceans does the prime meridian intersect?",
  "choices":[
    "the Indian Ocean",
    "the Arctic Ocean",
    "the Pacific Ocean"
  ],
  "answer":1,
  "hint":"",
  "image":"image.png",
  "task":"closed choice",
  "grade":"grade4",
  "subject":"social science",
  "topic":"geography",
  "category":"Maps",
  "skill":"Use lines of latitude and longitude",
  "lecture":"Lines of latitude and lines of longitude are imaginary lines drawn on some globes and maps. They can help you find places on globes and maps.\nLines of latitude show how far north or south a place is. We use units called degrees to describe how far a place is from the equator. The equator is the line located at 0\u00b0 latitude. We start counting degrees from there.\nLines north of the equator are labeled N for north. Lines south of the equator are labeled S for south. Lines of latitude are also called parallels because each line is parallel to the equator.\nLines of longitude are also called meridians. They show how far east or west a place is. We use degrees to help describe how far a place is from the prime meridian. The prime meridian is the line located at 0\u00b0 longitude. Lines west of the prime meridian are labeled W. Lines east of the prime meridian are labeled E. Meridians meet at the north and south poles.\nThe equator goes all the way around the earth, but the prime meridian is different. It only goes from the North Pole to the South Pole on one side of the earth. On the opposite side of the globe is another special meridian. It is labeled both 180\u00b0E and 180\u00b0W.\nTogether, lines of latitude and lines of longitude form a grid. You can use this grid to find the exact location of a place.",
  "solution":"The prime meridian is the line at 0\u00b0 longitude. It intersects the Arctic Ocean. It does not intersect the Indian Ocean or the Pacific Ocean.",
  "split":"val"
}
