# Supplementary material
Source: ML conference proceedings conference paper supplement (https://proceedings.neurips.cc/paper_files/paper/2022/hash/11332b6b6cf4485b84afadb1352d3a9a-Abstract.html)
Supplement: Supplementary file 1 [file 11332b6b6cf4485b84afadb1352d3a9a-Supplemental-Conference.zip › ScienceQA_Supplementary_Material/explore/data_examples/343/data.json]

{
  "question":"What is the mass of a can of soup?",
  "choices":[
    "12 ounces",
    "12 tons",
    "12 pounds"
  ],
  "answer":0,
  "hint":"Select the best estimate.",
  "image":null,
  "task":"closed choice",
  "grade":"grade5",
  "subject":"natural science",
  "topic":"units-and-measurement",
  "category":"Units and measurement",
  "skill":"Choose customary units of mass",
  "lecture":"Measurements are written with both a number and a unit. The unit comes after the number. The unit shows what the number means.\nMass is a measurement of how much matter something contains.\nThere are many different units of mass. When you are using customary units, mass may be written with units of ounces, pounds, or tons.\nThere are 16 ounces in 1 pound and 2,000 pounds in 1 ton.\nSo, 1 ounce is less than 1 pound and much less than 1 ton.\nA slice of bread has a mass of about 1 ounce, while a can of beans has a mass of about 1 pound. A small car has a mass of about 1 ton.",
  "solution":"The best estimate for the mass of a can of soup is 12 ounces.\n12 pounds and 12 tons are both too heavy.",
  "split":"val"
}
