# Supplementary material
Source: ML conference proceedings conference paper supplement (https://proceedings.neurips.cc/paper_files/paper/2022/hash/11332b6b6cf4485b84afadb1352d3a9a-Abstract.html)
Supplement: Supplementary file 1 [file 11332b6b6cf4485b84afadb1352d3a9a-Supplemental-Conference.zip › ScienceQA_Supplementary_Material/explore/data_examples/356/data.json]

{
  "question":"Which figure of speech is used in this text?\nThe grave's a fine and private place,\nBut none, I think, do there embrace.\n\u2014Andrew Marvell, \"To His Coy Mistress\"",
  "choices":[
    "understatement",
    "paradox"
  ],
  "answer":0,
  "hint":"",
  "image":null,
  "task":"closed choice",
  "grade":"grade11",
  "subject":"language science",
  "topic":"figurative-language",
  "category":"Literary devices",
  "skill":"Classify the figure of speech: review",
  "lecture":"Figures of speech are words or phrases that use language in a nonliteral or unusual way. They can make writing more expressive.\nAnaphora is the repetition of the same word or words at the beginning of several phrases or clauses.\nWe are united. We are powerful. We are winners.\nAntithesis involves contrasting opposing ideas within a parallel grammatical structure.\nI want to help, not to hurt.\nApostrophe is a direct address to an absent person or a nonhuman entity.\nOh, little bird, what makes you sing so beautifully?\nAssonance is the repetition of a vowel sound in a series of nearby words.\nTry to light the fire.\nChiasmus is an expression in which the second half parallels the first but reverses the order of words.\nNever let a fool kiss you or a kiss fool you.\nA euphemism is a polite or indirect expression that is used to de-emphasize an unpleasant topic.\nThe head of Human Resources would never refer to firing people, only to laying them off.\nHyperbole is an obvious exaggeration that is not meant to be taken literally.\nI ate so much that I think I might explode!\nAn oxymoron is a joining of two seemingly contradictory terms.\nSome reviewers are calling this book a new classic.\nA paradox is a statement that might at first appear to be contradictory, but that may in fact contain some truth.\nAlways expect the unexpected.\nUnderstatement involves deliberately representing something as less serious or important than it really is.\nAs you know, it can get a little cold in the Antarctic.",
  "solution":"The text uses understatement, which involves deliberately representing something as less serious or important than it really is.\nNone, I think, do there embrace is an understatement, since people who have died obviously can't do anything at all.",
  "split":"val"
}
