# Supplementary material
Source: ML conference proceedings conference paper supplement (https://proceedings.neurips.cc/paper_files/paper/2022/hash/11332b6b6cf4485b84afadb1352d3a9a-Abstract.html)
Supplement: Supplementary file 1 [file 11332b6b6cf4485b84afadb1352d3a9a-Supplemental-Conference.zip › ScienceQA_Supplementary_Material/explore/data_examples/357/data.json]

{
  "question":"Which is the most flexible?",
  "choices":[
    "burlap sack",
    "wax crayons",
    "concrete steps"
  ],
  "answer":0,
  "hint":"",
  "image":null,
  "task":"closed choice",
  "grade":"grade4",
  "subject":"natural science",
  "topic":"physics",
  "category":"Materials",
  "skill":"Compare properties of materials",
  "lecture":"Every object is made of one or more materials. A material is a type of matter. Wood, glass, metal, and plastic are common materials.\nA material has different properties. A material's properties tell you how it looks, feels, tastes, or smells. Some examples of properties are shiny, hard, fragile, and stretchy.\nFor example, a shiny material reflects a lot of light. A fragile material breaks when you drop it.",
  "solution":"Flexible is a property. A flexible material can be bent without breaking easily.\nLook at each picture, one at a time. Imagine bending the material shown in each picture.\nOf the choices, the burlap sack is the most flexible. If you twist burlap fabric, it will not break.",
  "split":"val"
}
