# Supplementary material
Source: ML conference proceedings conference paper supplement (https://proceedings.neurips.cc/paper_files/paper/2022/hash/11332b6b6cf4485b84afadb1352d3a9a-Abstract.html)
Supplement: Supplementary file 1 [file 11332b6b6cf4485b84afadb1352d3a9a-Supplemental-Conference.zip › ScienceQA_Supplementary_Material/explore/data_examples/358/data.json]

{
  "question":"What can Rebecca and Damon trade to each get what they want?",
  "choices":[
    "Damon can trade his almonds for Rebecca's tomatoes.",
    "Rebecca can trade her tomatoes for Damon's broccoli.",
    "Rebecca can trade her tomatoes for Damon's carrots.",
    "Damon can trade his broccoli for Rebecca's oranges."
  ],
  "answer":1,
  "hint":"Trade happens when people agree to exchange goods and services. People give up something to get something else. Sometimes people barter, or directly exchange one good or service for another.\nRebecca and Damon open their lunch boxes in the school cafeteria. Neither Rebecca nor Damon got everything that they wanted. The table below shows which items they each wanted:\n\nLook at the images of their lunches. Then answer the question below.\nRebecca's lunch Damon's lunch",
  "image":"image.png",
  "task":"closed choice",
  "grade":"grade8",
  "subject":"social science",
  "topic":"economics",
  "category":"Basic economic principles",
  "skill":"Trade and specialization",
  "lecture":"",
  "solution":"Look at the table and images.\nRebecca wants broccoli. Damon wants tomatoes. They can trade tomatoes for broccoli to both get what they want. Trading other things would not help both people get more items they want.",
  "split":"val"
}
