# Supplementary material
Source: ML conference proceedings conference paper supplement (https://proceedings.neurips.cc/paper_files/paper/2022/hash/11332b6b6cf4485b84afadb1352d3a9a-Abstract.html)
Supplement: Supplementary file 1 [file 11332b6b6cf4485b84afadb1352d3a9a-Supplemental-Conference.zip › ScienceQA_Supplementary_Material/explore/data_examples/360/data.json]

{
  "question":"Easter is an important holiday in which religion?",
  "choices":[
    "Hinduism",
    "Christianity",
    "Islam",
    "Judaism"
  ],
  "answer":1,
  "hint":"",
  "image":null,
  "task":"closed choice",
  "grade":"grade2",
  "subject":"social science",
  "topic":"culture",
  "category":"Cultural celebrations",
  "skill":"Easter",
  "lecture":"",
  "solution":"Easter is an important holiday in Christianity. People who practice Christianity are called Christians.",
  "split":"val"
}
