# Supplementary material
Source: ML conference proceedings conference paper supplement (https://proceedings.neurips.cc/paper_files/paper/2022/hash/11332b6b6cf4485b84afadb1352d3a9a-Abstract.html)
Supplement: Supplementary file 1 [file 11332b6b6cf4485b84afadb1352d3a9a-Supplemental-Conference.zip › ScienceQA_Supplementary_Material/explore/data_examples/367/data.json]

{
  "question":"What kind of sentence is this?\nWhy is your position on sales tax so different from your stance toward related issues?",
  "choices":[
    "interrogative",
    "imperative",
    "declarative"
  ],
  "answer":0,
  "hint":"",
  "image":null,
  "task":"closed choice",
  "grade":"grade9",
  "subject":"language science",
  "topic":"punctuation",
  "category":"Sentences, fragments, and run-ons",
  "skill":"Is the sentence declarative, interrogative, imperative, or exclamatory?",
  "lecture":"There are four kinds of sentences.\nA declarative sentence is a statement and always ends with a period.\nThe nurse told Mr. Abrams to roll up his sleeve so that she could check his blood pressure.\nAn imperative sentence makes a request or a demand and usually ends with a period. If a demand shows strong feeling, it can end with an exclamation point.\nFor this assignment, use references to support your claims.\nDon't drive so quickly in the construction zone!\nAn interrogative sentence asks a question and always ends with a question mark.\nGiven the recent critiques of her new strategic plan, do you think the CEO will reconsider the company's direction?\nAn exclamatory sentence is a statement that shows surprise or strong feeling. An exclamation always ends with an exclamation point.\nI can't wait to travel through Europe this summer!",
  "solution":"The sentence asks a question and ends with a question mark. It is an interrogative sentence.",
  "split":"val"
}
