# Supplementary material
Source: ML conference proceedings conference paper supplement (https://proceedings.neurips.cc/paper_files/paper/2022/hash/11332b6b6cf4485b84afadb1352d3a9a-Abstract.html)
Supplement: Supplementary file 1 [file 11332b6b6cf4485b84afadb1352d3a9a-Supplemental-Conference.zip › ScienceQA_Supplementary_Material/explore/data_examples/371/data.json]

{
  "question":"Which text uses the word can in its traditional sense?",
  "choices":[
    "As they observed the animals on the open grassland, the wildlife photographer said to Kevin, \"Did you know that cheetahs can run as fast as seventy-five miles per hour?\"",
    "As they observed the cheetahs on the open grassland, the wildlife photographer said to Kevin, \"You can borrow my camera if you want.\""
  ],
  "answer":0,
  "hint":"",
  "image":null,
  "task":"closed choice",
  "grade":"grade9",
  "subject":"language science",
  "topic":"writing-strategies",
  "category":"Word usage and nuance",
  "skill":"Explore words with new or contested usages",
  "lecture":"Words change in meaning when speakers begin using them in new ways. For example, the word peruse once only meant to examine in detail, but it's now also commonly used to mean to look through in a casual manner.\nWhen a word changes in meaning, its correct usage is often debated. Although a newer sense of the word may be more commonly used, many people consider a word's traditional definition to be the correct usage. Being able to distinguish the different uses of a word can help you use it appropriately for different audiences.\nBritney perused her notes, carefully preparing for her exam.\nThe traditional usage above is considered more standard.\nDavid perused the magazine, absentmindedly flipping through the pages.\nThe nontraditional usage above is now commonly used, but traditional style guides generally advise against it.",
  "solution":"The first text uses can in its traditional sense: to have the ability to.\nAs they observed the animals on the open grassland, the wildlife photographer said to Kevin, \"Did you know that cheetahs can run as fast as seventy-five miles per hour?\"\nThe second text uses can in its nontraditional sense: to have permission to.\nAs they observed the cheetahs on the open grassland, the wildlife photographer said to Kevin, \"You can borrow my camera if you want.\"\nMost style guides recommend to use the traditional sense of the word can because it is considered more standard.",
  "split":"val"
}
