# Supplementary material
Source: ML conference proceedings conference paper supplement (https://proceedings.neurips.cc/paper_files/paper/2022/hash/11332b6b6cf4485b84afadb1352d3a9a-Abstract.html)
Supplement: Supplementary file 1 [file 11332b6b6cf4485b84afadb1352d3a9a-Supplemental-Conference.zip › ScienceQA_Supplementary_Material/explore/data_examples/376/data.json]

{
  "question":"Which animal's body is better adapted for protection against a predator with sharp teeth?",
  "choices":[
    "queen conch",
    "collared dove"
  ],
  "answer":0,
  "hint":"Nautiluses live in the ocean. They have a hard outer shell.\nThe  is adapted to protect itself from predators with sharp teeth. It can pull the soft parts of its body into its shell when attacked.\nFigure: nautilus.",
  "image":"image.png",
  "task":"closed choice",
  "grade":"grade5",
  "subject":"natural science",
  "topic":"biology",
  "category":"Adaptations",
  "skill":"Animal adaptations: skins and body coverings",
  "lecture":"An adaptation is an inherited trait that helps an organism survive or reproduce. Adaptations can include both body parts and behaviors.\nThe color, texture, and covering of an animal's skin are examples of adaptations. Animals' skins can be adapted in different ways. For example, skin with thick fur might help an animal stay warm. Skin with sharp spines might help an animal defend itself against predators.",
  "solution":"Look at the picture of the nautilus.\nThe nautilus has a hard outer shell. Its body is adapted for protection against a predator with sharp teeth. The hard shell makes it difficult for predators to hurt or kill the nautilus.\nNow look at each animal. Figure out which animal has a similar adaptation.\nThe queen conch has a hard outer shell. Its body is adapted for protection against a predator with sharp teeth.\nThe collared dove has soft feathers covering its skin. Its body is not adapted for protection against predators with sharp teeth.",
  "split":"val"
}
