# Supplementary material
Source: ML conference proceedings conference paper supplement (https://proceedings.neurips.cc/paper_files/paper/2022/hash/11332b6b6cf4485b84afadb1352d3a9a-Abstract.html)
Supplement: Supplementary file 1 [file 11332b6b6cf4485b84afadb1352d3a9a-Supplemental-Conference.zip › ScienceQA_Supplementary_Material/explore/data_examples/384/data.json]

{
  "question":"What is the capital of Wyoming?",
  "choices":[
    "Salem",
    "Anchorage",
    "Laramie",
    "Cheyenne"
  ],
  "answer":3,
  "hint":"",
  "image":"image.png",
  "task":"closed choice",
  "grade":"grade3",
  "subject":"social science",
  "topic":"geography",
  "category":"State capitals",
  "skill":"Identify the 50 state capitals",
  "lecture":"",
  "solution":"Cheyenne is the capital of Wyoming.",
  "split":"val"
}
