# Supplementary material
Source: ML conference proceedings conference paper supplement (https://proceedings.neurips.cc/paper_files/paper/2022/hash/11332b6b6cf4485b84afadb1352d3a9a-Abstract.html)
Supplement: Supplementary file 1 [file 11332b6b6cf4485b84afadb1352d3a9a-Supplemental-Conference.zip › ScienceQA_Supplementary_Material/explore/data_examples/393/data.json]

{
  "question":"Complete the sentence so that it uses personification.\nThe stars () as we gazed up in wonder.",
  "choices":[
    "glowed",
    "winked"
  ],
  "answer":1,
  "hint":"",
  "image":null,
  "task":"closed choice",
  "grade":"grade10",
  "subject":"language science",
  "topic":"writing-strategies",
  "category":"Creative techniques",
  "skill":"Use personification",
  "lecture":"Personification is giving human characteristics to nonhuman things. It is a figure of speech that can be used to make writing more interesting or to emphasize a point.\nThe trees danced in the wind.\nThe word danced describes the trees as if they were people. Unlike people, however, trees can't actually dance. Instead, the personification suggests that the trees are moving.",
  "solution":"Complete the sentence with the word winked. It describes the stars as if they were people looking down and noticing us.",
  "split":"val"
}
