# Supplementary material
Source: ML conference proceedings conference paper supplement (https://proceedings.neurips.cc/paper_files/paper/2022/hash/11332b6b6cf4485b84afadb1352d3a9a-Abstract.html)
Supplement: Supplementary file 1 [file 11332b6b6cf4485b84afadb1352d3a9a-Supplemental-Conference.zip › ScienceQA_Supplementary_Material/explore/data_examples/394/data.json]

{
  "question":"What is the direction of this push?",
  "choices":[
    "toward his finger",
    "away from his finger"
  ],
  "answer":1,
  "hint":"A child presses a button in an elevator. He uses a force to push the button with his finger.",
  "image":"image.png",
  "task":"closed choice",
  "grade":"grade4",
  "subject":"natural science",
  "topic":"physics",
  "category":"Force and motion",
  "skill":"Identify directions of forces",
  "lecture":"A force is a push or a pull that one object applies to another. Every force has a direction.\nThe direction of a push is away from the object that is pushing.\nThe direction of a pull is toward the object that is pulling.",
  "solution":"The child pushes the button. The direction of the push is away from his finger.",
  "split":"val"
}
