# Supplementary material
Source: ML conference proceedings conference paper supplement (https://proceedings.neurips.cc/paper_files/paper/2022/hash/11332b6b6cf4485b84afadb1352d3a9a-Abstract.html)
Supplement: Supplementary file 1 [file 11332b6b6cf4485b84afadb1352d3a9a-Supplemental-Conference.zip › ScienceQA_Supplementary_Material/explore/data_examples/399/data.json]

{
  "question":"Which statement describes the Gobi Desert ecosystem?",
  "choices":[
    "It has warm summers and mild winters.",
    "It has a small amount of rain or snow."
  ],
  "answer":1,
  "hint":"Figure: Gobi Desert.\nThe Gobi Desert is a cold desert ecosystem located in northern China and southern Mongolia. This desert is next to the Himalayan Mountains and used to be part of the Mongol Empire.",
  "image":"image.png",
  "task":"closed choice",
  "grade":"grade8",
  "subject":"natural science",
  "topic":"biology",
  "category":"Ecosystems",
  "skill":"Describe ecosystems",
  "lecture":"An environment includes all of the biotic, or living, and abiotic, or nonliving, things in an area. An ecosystem is created by the relationships that form among the biotic and abiotic parts of an environment.\nThere are many different types of terrestrial, or land-based, ecosystems. Here are some ways in which terrestrial ecosystems can differ from each other:\nthe pattern of weather, or climate\nthe type of soil\nthe organisms that live there",
  "solution":"A cold desert is a type of ecosystem. Cold deserts have the following features: a small amount of rain or snow, dry, thin soil, and long, cold winters. So, the following statements describe the Gobi Desert ecosystem: a small amount of rain or snow, dry, thin soil, and long, cold winters. It has a small amount of rain or snow. It has long, cold winters. The following statement does not describe the Gobi Desert: a small amount of rain or snow, dry, thin soil, and long, cold winters. It has warm summers and mild winters.",
  "split":"val"
}
