# Supplementary material
Source: ML conference proceedings conference paper supplement (https://proceedings.neurips.cc/paper_files/paper/2022/hash/11332b6b6cf4485b84afadb1352d3a9a-Abstract.html)
Supplement: Supplementary file 1 [file 11332b6b6cf4485b84afadb1352d3a9a-Supplemental-Conference.zip › ScienceQA_Supplementary_Material/explore/data_examples/418/data.json]

{
  "question":"Which of the following could Kenneth's test show?",
  "choices":[
    "how steady a parachute with a 1 m vent was at 200 km per hour",
    "whether a parachute with a 1 m vent would swing too much at 400 km per hour",
    "if the spacecraft was damaged when using a parachute with a 1 m vent going 200 km per hour"
  ],
  "answer":0,
  "hint":"People can use the engineering-design process to develop solutions to problems. One step in the process is testing if a potential solution meets the requirements of the design.\nThe passage below describes how the engineering-design process was used to test a solution to a problem. Read the passage. Then answer the question below.\n\nKenneth was an aerospace engineer who was developing a parachute for a spacecraft that would land on Mars. He needed to add a vent at the center of the parachute so the spacecraft would land smoothly. However, the spacecraft would have to travel at a high speed before landing. If the vent was too big or too small, the parachute might swing wildly at this speed. The movement could damage the spacecraft.\nSo, to help decide how big the vent should be, Kenneth put a parachute with a 1 m vent in a wind tunnel. The wind tunnel made it seem like the parachute was moving at 200 km per hour. He observed the parachute to see how much it swung.\nFigure: a spacecraft's parachute in a wind tunnel.",
  "image":"image.png",
  "task":"closed choice",
  "grade":"grade8",
  "subject":"natural science",
  "topic":"science-and-engineering-practices",
  "category":"Engineering practices",
  "skill":"Evaluate tests of engineering-design solutions",
  "lecture":"People can use the engineering-design process to develop solutions to problems. One step in the process is testing if a potential solution meets the requirements of the design. How can you determine what a test can show? You need to figure out what was tested and what was measured.\nImagine an engineer needs to design a bridge for a windy location. She wants to make sure the bridge will not move too much in high wind. So, she builds a smaller prototype, or model, of a bridge. Then, she exposes the prototype to high winds and measures how much the bridge moves.\nFirst, identify what was tested. A test can examine one design, or it may compare multiple prototypes to each other. In the test described above, the engineer tested a prototype of a bridge in high wind.\nThen, identify what the test measured. One of the criteria for the bridge was that it not move too much in high winds. The test measured how much the prototype bridge moved.\nTests can show how well one or more designs meet the criteria. The test described above can show whether the bridge would move too much in high winds.",
  "solution":"",
  "split":"val"
}
