# Supplementary material
Source: ML conference proceedings conference paper supplement (https://proceedings.neurips.cc/paper_files/paper/2022/hash/11332b6b6cf4485b84afadb1352d3a9a-Abstract.html)
Supplement: Supplementary file 1 [file 11332b6b6cf4485b84afadb1352d3a9a-Supplemental-Conference.zip › ScienceQA_Supplementary_Material/explore/data_examples/420/data.json]

{
  "question":"What is the expected ratio of offspring with fuzzy leaves to offspring with smooth leaves? Choose the most likely ratio.",
  "choices":[
    "0:4",
    "1:3",
    "4:0",
    "3:1",
    "2:2"
  ],
  "answer":4,
  "hint":"In a group of summer squash plants, some individuals have fuzzy leaves and others have smooth leaves. In this group, the gene for the leaf texture trait has two alleles. The allele for fuzzy leaves (L) is dominant over the allele for smooth leaves (l).\nThis Punnett square shows a cross between two summer squash plants.",
  "image":"image.png",
  "task":"closed choice",
  "grade":"grade8",
  "subject":"natural science",
  "topic":"biology",
  "category":"Genes to traits",
  "skill":"Use Punnett squares to calculate ratios of offspring types",
  "lecture":"Offspring phenotypes: dominant or recessive?\nHow do you determine an organism's phenotype for a trait? Look at the combination of alleles in the organism's genotype for the gene that affects that trait. Some alleles have types called dominant and recessive. These two types can cause different versions of the trait to appear as the organism's phenotype.\nIf an organism's genotype has at least one dominant allele for a gene, the organism's phenotype will be the dominant allele's version of the gene's trait.\nIf an organism's genotype has only recessive alleles for a gene, the organism's phenotype will be the recessive allele's version of the gene's trait.\nA Punnett square shows what types of offspring a cross can produce. The expected ratio of offspring types compares how often the cross produces each type of offspring, on average. To write this ratio, count the number of boxes in the Punnett square representing each type.\nFor example, consider the Punnett square below.\n | F | f\nF | FF | Ff\nf | Ff | ff\nThere is 1 box with the genotype FF and 2 boxes with the genotype Ff. So, the expected ratio of offspring with the genotype FF to those with Ff is 1:2.\n",
  "solution":"To determine how many boxes in the Punnett square represent offspring with fuzzy leaves or smooth leaves, consider whether each phenotype is the dominant or recessive allele's version of the leaf texture trait. The question tells you that the L allele, which is for fuzzy leaves, is dominant over the l allele, which is for smooth leaves.\nFuzzy leaves is the dominant allele's version of the leaf texture trait. A summer squash plant with the dominant version of the leaf texture trait must have at least one dominant allele for the leaf texture gene. So, offspring with fuzzy leaves must have the genotype LL or Ll.\nThere are 2 boxes in the Punnett square with the genotype LL or Ll. These boxes are highlighted below.\nSmooth leaves is the recessive allele's version of the leaf texture trait. A summer squash plant with the recessive version of the leaf texture trait must have only recessive alleles for the leaf texture gene. So, offspring with smooth leaves must have the genotype ll.\nThere are 2 boxes in the Punnett square with the genotype ll. These boxes are highlighted below.\nSo, the expected ratio of offspring with fuzzy leaves to offspring with smooth leaves is 2:2. This means that, on average, this cross will produce 2 offspring with fuzzy leaves for every 2 offspring with smooth leaves.",
  "split":"val"
}
