# Supplementary material
Source: ML conference proceedings conference paper supplement (https://proceedings.neurips.cc/paper_files/paper/2022/hash/11332b6b6cf4485b84afadb1352d3a9a-Abstract.html)
Supplement: Supplementary file 1 [file 11332b6b6cf4485b84afadb1352d3a9a-Supplemental-Conference.zip › ScienceQA_Supplementary_Material/explore/data_examples/421/data.json]

{
  "question":"Which of the following could Emilio's test show?",
  "choices":[
    "if at least 20% of the park would be shaded by trees in each design",
    "which design would have the least traffic noise in the concert area",
    "which design would have the greatest distance between the concert area and the road"
  ],
  "answer":2,
  "hint":"People can use the engineering-design process to develop solutions to problems. One step in the process is testing if a potential solution meets the requirements of the design.\nThe passage below describes how the engineering-design process was used to test a solution to a problem. Read the passage. Then answer the question below.\n\nEmilio was a landscape architect who was hired to design a new city park. The city council wanted the park to have space for outdoor concerts and to have at least 20% of the park shaded by trees. Emilio thought the concert area should be at least 150 meters from the road so traffic noise didn't interrupt the music. He developed three possible designs for the park with the concert area in a different location in each design. Then, he tested each design by measuring the distance between the road and the concert area.\nFigure: studying an architect's design.",
  "image":"image.png",
  "task":"closed choice",
  "grade":"grade7",
  "subject":"natural science",
  "topic":"science-and-engineering-practices",
  "category":"Engineering practices",
  "skill":"Evaluate tests of engineering-design solutions",
  "lecture":"People can use the engineering-design process to develop solutions to problems. One step in the process is testing if a potential solution meets the requirements of the design. How can you determine what a test can show? You need to figure out what was tested and what was measured.\nImagine an engineer needs to design a bridge for a windy location. She wants to make sure the bridge will not move too much in high wind. So, she builds a smaller prototype, or model, of a bridge. Then, she exposes the prototype to high winds and measures how much the bridge moves.\nFirst, identify what was tested. A test can examine one design, or it may compare multiple prototypes to each other. In the test described above, the engineer tested a prototype of a bridge in high wind.\nThen, identify what the test measured. One of the criteria for the bridge was that it not move too much in high winds. The test measured how much the prototype bridge moved.\nTests can show how well one or more designs meet the criteria. The test described above can show whether the bridge would move too much in high winds.",
  "solution":"",
  "split":"val"
}
