# Supplementary material
Source: ML conference proceedings conference paper supplement (https://proceedings.neurips.cc/paper_files/paper/2022/hash/11332b6b6cf4485b84afadb1352d3a9a-Abstract.html)
Supplement: Supplementary file 1 [file 11332b6b6cf4485b84afadb1352d3a9a-Supplemental-Conference.zip › ScienceQA_Supplementary_Material/explore/data_examples/422/data.json]

{
  "question":"Identify the question that Tim's experiment can best answer.",
  "choices":[
    "Can pennies hold more drops of water mixed with dish soap or water mixed with hand soap?",
    "Can pennies hold more drops of pure water or water mixed with hand soap?"
  ],
  "answer":1,
  "hint":"The passage below describes an experiment. Read the passage and then follow the instructions below.\n\nTim used a dropper to put equal-sized drops of pure water, one at a time, onto a penny. The drops stayed together and formed a dome on the penny's surface. Tim recorded the number of drops he could add before the water spilled over the edge of the penny. Then, he rinsed and dried the penny, and repeated the test using water mixed with hand soap. He repeated these trials on nine additional pennies. Tim compared the average number of pure water drops to the average number of water drops mixed with hand soap that he could add to a penny before the water spilled over.\nFigure: a dome of water on the surface of a penny.",
  "image":"image.png",
  "task":"closed choice",
  "grade":"grade6",
  "subject":"natural science",
  "topic":"science-and-engineering-practices",
  "category":"Designing experiments",
  "skill":"Identify the experimental question",
  "lecture":"Experiments can be designed to answer specific questions. How can you identify the questions that a certain experiment can answer? In order to do this, you need to figure out what was tested and what was measured during the experiment.\nImagine an experiment with two groups of daffodil plants. One group of plants was grown in sandy soil, and the other was grown in clay soil. Then, the height of each plant was measured.\nFirst, identify the part of the experiment that was tested. The part of an experiment that is tested usually involves the part of the experimental setup that is different or changed. In the experiment described above, each group of plants was grown in a different type of soil. So, the effect of growing plants in different soil types was tested.\nThen, identify the part of the experiment that was measured. The part of the experiment that is measured may include measurements and calculations. In the experiment described above, the heights of the plants in each group were measured.\nExperiments can answer questions about how the part of the experiment that is tested affects the part that is measured. So, the experiment described above can answer questions about how soil type affects plant height.\nExamples of questions that this experiment can answer include:\nDoes soil type affect the height of daffodil plants?\nDo daffodil plants in sandy soil grow taller than daffodil plants in clay soil?\nAre daffodil plants grown in sandy soil shorter than daffodil plants grown in clay soil?",
  "solution":"",
  "split":"val"
}
