# Supplementary material
Source: ML conference proceedings conference paper supplement (https://proceedings.neurips.cc/paper_files/paper/2022/hash/11332b6b6cf4485b84afadb1352d3a9a-Abstract.html)
Supplement: Supplementary file 1 [file 11332b6b6cf4485b84afadb1352d3a9a-Supplemental-Conference.zip › ScienceQA_Supplementary_Material/explore/data_examples/426/data.json]

{
  "question":"Think about the magnetic force between the magnets in each pair. Which of the following statements is true?",
  "choices":[
    "The magnetic force is stronger in Pair 1.",
    "The magnetic force is stronger in Pair 2.",
    "The strength of the magnetic force is the same in both pairs."
  ],
  "answer":0,
  "hint":"The images below show two pairs of magnets. The magnets in different pairs do not affect each other. All the magnets shown are made of the same material.",
  "image":"image.png",
  "task":"closed choice",
  "grade":"grade3",
  "subject":"natural science",
  "topic":"physics",
  "category":"Magnets",
  "skill":"Compare strengths of magnetic forces",
  "lecture":"Magnets can pull or push on each other without touching. When magnets attract, they pull together. When magnets repel, they push apart.\nThese pulls and pushes between magnets are called magnetic forces. The stronger the magnetic force between two magnets, the more strongly the magnets attract or repel each other.\nYou can change the strength of a magnetic force between two magnets by changing the distance between them. The magnetic force is stronger when the magnets are closer together.",
  "solution":"Distance affects the strength of the magnetic force. When magnets are closer together, the magnetic force between them is stronger.\nThe magnets in Pair 1 are closer together than the magnets in Pair 2. So, the magnetic force is stronger in Pair 1 than in Pair 2.",
  "split":"val"
}
