# Supplementary material
Source: ML conference proceedings conference paper supplement (https://proceedings.neurips.cc/paper_files/paper/2022/hash/11332b6b6cf4485b84afadb1352d3a9a-Abstract.html)
Supplement: Supplementary file 1 [file 11332b6b6cf4485b84afadb1352d3a9a-Supplemental-Conference.zip › ScienceQA_Supplementary_Material/explore/data_examples/431/data.json]

{
  "question":"Which word would you find on a dictionary page with the following guide words?\npile - push",
  "choices":[
    "pecan",
    "pot"
  ],
  "answer":1,
  "hint":"",
  "image":null,
  "task":"closed choice",
  "grade":"grade8",
  "subject":"language science",
  "topic":"reference-skills",
  "category":"Reference skills",
  "skill":"Use guide words",
  "lecture":"Guide words appear on each page of a dictionary. They tell you the first word and last word on the page. The other words on the page come between the guide words in alphabetical order.\nTo put words in alphabetical order, put them in order by their first letters. If the first letters are the same, look at the second letters. If the second letters are the same, look at the third letters, and so on.\nIf one word is shorter, and there are no more letters to compare, then the shorter word comes first in alphabetical order. For example, be comes before bed.",
  "solution":"Put the words in alphabetical order.\nSince pot is between the guide words pile - push, it would be found on that page.",
  "split":"val"
}
