# Supplementary material
Source: ML conference proceedings conference paper supplement (https://proceedings.neurips.cc/paper_files/paper/2022/hash/11332b6b6cf4485b84afadb1352d3a9a-Abstract.html)
Supplement: Supplementary file 1 [file 11332b6b6cf4485b84afadb1352d3a9a-Supplemental-Conference.zip › ScienceQA_Supplementary_Material/explore/data_examples/455/data.json]

{
  "question":"Which change best matches the sentence?\nAn area becomes less wet and less green after years with no rain.",
  "choices":[
    "drought",
    "erosion",
    "landslide"
  ],
  "answer":0,
  "hint":"",
  "image":null,
  "task":"closed choice",
  "grade":"grade3",
  "subject":"natural science",
  "topic":"earth-science",
  "category":"Earth events",
  "skill":"Classify changes to Earth's surface II",
  "lecture":"",
  "solution":"",
  "split":"val"
}
