# Supplementary material
Source: ML conference proceedings conference paper supplement (https://proceedings.neurips.cc/paper_files/paper/2022/hash/11332b6b6cf4485b84afadb1352d3a9a-Abstract.html)
Supplement: Supplementary file 1 [file 11332b6b6cf4485b84afadb1352d3a9a-Supplemental-Conference.zip › ScienceQA_Supplementary_Material/explore/data_examples/475/data.json]

{
  "question":"Which trait did Ichthyornis have? Select the trait you can observe in the drawing.",
  "choices":[
    "fur",
    "a short tail"
  ],
  "answer":1,
  "hint":"This drawing shows the skeleton of an ancient animal called Ichthyornis. This drawing was made by looking at the animal's fossils.",
  "image":"image.png",
  "task":"closed choice",
  "grade":"grade6",
  "subject":"natural science",
  "topic":"earth-science",
  "category":"Fossils",
  "skill":"Compare fossils to modern organisms",
  "lecture":"The way an organism looks or acts is called a trait. Scientists use fossils to learn more about the traits of ancient organisms.\nFossils can preserve the remains of body parts and activities. A fossil of a body part, such as a tail or a wing, can tell you what an organism looked like. A fossil of an organism's activities, such as a burrow or a footprint, can tell you about the organism's behavior.\nHere are three examples of fossils and the traits that you can observe from them:\nThis is a fossil of an animal. This fossil tells you that the animal had a spiral-shaped shell.\nThis is a fossil of a plant. This fossil tells you that the plant had small leaves arranged in a branched pattern.\nThis is a fossil of an animal's footprint. This fossil tells you that the animal could walk on land.\nAn organism's fossil may not show all of the organism's traits. This is because most body parts are destroyed during fossil formation. When an organism's body turns into a fossil, only a few body parts are usually preserved.",
  "solution":"",
  "split":"val"
}
