# Supplementary material
Source: ML conference proceedings conference paper supplement (https://proceedings.neurips.cc/paper_files/paper/2022/hash/11332b6b6cf4485b84afadb1352d3a9a-Abstract.html)
Supplement: Supplementary file 1 [file 11332b6b6cf4485b84afadb1352d3a9a-Supplemental-Conference.zip › ScienceQA_Supplementary_Material/explore/data_examples/486/data.json]

{
  "question":"What is the source of the allusion in the sentence below?\nSappy love songs are Kryptonite to my otherwise stoic father.",
  "choices":[
    "U.S. history",
    "a comic"
  ],
  "answer":1,
  "hint":"",
  "image":null,
  "task":"closed choice",
  "grade":"grade9",
  "subject":"language science",
  "topic":"figurative-language",
  "category":"Literary devices",
  "skill":"Recall the source of an allusion",
  "lecture":"An allusion is a brief mention of something or someone well known, often from mythology, history, or literature. An allusion lets you reference ideas from an entire story in just a few words.\n\"I'd better get home before I turn into a pumpkin!\" Lila remarked.\nHere, Lila alludes to the fairy tale \"Cinderella,\" in which Cinderella must leave the ball before the coach that brought her transforms into a pumpkin. The allusion shows that Lila must depart immediately.",
  "solution":"The source of the allusion Kryptonite is a comic.\nKryptonite, matter from Superman's home planet, is the only thing that can reduce the superhero's strength.\nThe allusion Kryptonite means a source of weakness.",
  "split":"val"
}
