# Supplementary material
Source: ML conference proceedings conference paper supplement (https://proceedings.neurips.cc/paper_files/paper/2022/hash/11332b6b6cf4485b84afadb1352d3a9a-Abstract.html)
Supplement: Supplementary file 1 [file 11332b6b6cf4485b84afadb1352d3a9a-Supplemental-Conference.zip › ScienceQA_Supplementary_Material/explore/data_examples/497/data.json]

{
  "question":"Is perfume a mineral?",
  "choices":[
    "no",
    "yes"
  ],
  "answer":0,
  "hint":"Perfume has the following properties:\nnot a pure substance\nliquid\nhuman-made\nno fixed crystal structure",
  "image":"image.png",
  "task":"yes or no",
  "grade":"grade5",
  "subject":"natural science",
  "topic":"earth-science",
  "category":"Rocks and minerals",
  "skill":"Identify rocks and minerals",
  "lecture":"Properties are used to identify different substances. Minerals have the following properties:\nIt is a solid.\nIt is formed in nature.\nIt is not made by organisms.\nIt is a pure substance.\nIt has a fixed crystal structure.\nIf a substance has all five of these properties, then it is a mineral.\nLook closely at the last three properties:\nA mineral is not made by organisms.\nOrganisms make their own body parts. For example, snails and clams make their shells. Because they are made by organisms, body parts cannot be minerals.\nHumans are organisms too. So, substances that humans make by hand or in factories cannot be minerals.\nA mineral is a pure substance.\nA pure substance is made of only one type of matter. All minerals are pure substances.\nA mineral has a fixed crystal structure.\nThe crystal structure of a substance tells you how the atoms or molecules in the substance are arranged. Different types of minerals have different crystal structures, but all minerals have a fixed crystal structure. This means that the atoms or molecules in different pieces of the same type of mineral are always arranged the same way.\n",
  "solution":"Perfume does not have all the properties of a mineral. So, perfume is not a mineral.",
  "split":"val"
}
