# Supplementary material
Source: ML conference proceedings conference paper supplement (https://proceedings.neurips.cc/paper_files/paper/2022/hash/11332b6b6cf4485b84afadb1352d3a9a-Abstract.html)
Supplement: Supplementary file 1 [file 11332b6b6cf4485b84afadb1352d3a9a-Supplemental-Conference.zip › ScienceQA_Supplementary_Material/explore/data_examples/502/data.json]

{
  "question":"Select the temperature shown by this thermometer.",
  "choices":[
    "105\u00b0F",
    "95\u00b0F",
    "70\u00b0F"
  ],
  "answer":1,
  "hint":"",
  "image":null,
  "task":"closed choice",
  "grade":"grade3",
  "subject":"natural science",
  "topic":"units-and-measurement",
  "category":"Weather and climate",
  "skill":"Read a thermometer",
  "lecture":"A thermometer is a tool that measures temperature. Temperature can be measured in degrees. The symbol for degrees is \u00b0.\nSome thermometers measure temperature in degrees Fahrenheit (\u00b0F). Fahrenheit is one scale used to measure temperature.\nThis is a tube thermometer. It has a tube filled with a red liquid.\nThere is a Fahrenheit scale along the right side of the tube. The top of the red liquid lines up with the number 80 on the scale. So, the temperature shown by this thermometer is 80\u00b0F.",
  "solution":"Find the top of the red liquid.\nNow look at the scale to the right. The top of the red liquid is halfway between 90 and 100. So, the temperature is 95\u00b0F.",
  "split":"val"
}
