# Supplementary material
Source: ML conference proceedings conference paper supplement (https://proceedings.neurips.cc/paper_files/paper/2022/hash/11332b6b6cf4485b84afadb1352d3a9a-Abstract.html)
Supplement: Supplementary file 1 [file 11332b6b6cf4485b84afadb1352d3a9a-Supplemental-Conference.zip › ScienceQA_Supplementary_Material/explore/pages/problems.js]

problem_data = [
  {
    "question":"What does the verbal irony in this text suggest?\nAccording to Mr. Herrera's kids, his snoring is as quiet as a jackhammer.",
    "choices":[
      "The snoring is loud.",
      "The snoring occurs in bursts."
    ],
    "answer":0,
    "hint":null,
    "image":null,
    "task":"closed-choice",
    "grade":"grade8",
    "subject":"language science",
    "topic":"figurative-language",
    "category":"Literary devices",
    "skill":"Interpret figures of speech",
    "lecture":"Figures of speech are words or phrases that use language in a nonliteral or unusual way. They can make writing more expressive. Verbal irony involves saying one thing but implying something very different. People often use verbal irony when they are being sarcastic. Olivia seems thrilled that her car keeps breaking down. Each breakdown is as enjoyable as a punch to the face.",
    "solution":"The text uses verbal irony, which involves saying one thing but implying something very different.\nAs quiet as a jackhammer suggests that the snoring is loud. A jackhammer is not quiet, and neither is Mr. Herrera's snoring.",
    "split":"val",
    "path":null
  },
  {
    "question":"Which animal's mouth is also adapted for bottom feeding?",
    "choices":[
      "discus",
      "armored catfish"
    ],
    "answer":1,
    "hint":"Sturgeons eat invertebrates, plants, and small fish. They are bottom feeders. Bottom feeders find their food at the bottom of rivers, lakes, and the ocean.\nThe 's mouth is located on the underside of its head and points downward. Its mouth is adapted for bottom feeding.\nFigure: sturgeon.",
    "image":"image.png",
    "task":"closed-choice",
    "grade":"grade3",
    "subject":"natural science",
    "topic":"biology",
    "category":"Adaptations",
    "skill":"Animal adaptations: beaks, mouths, and necks",
    "lecture":"An adaptation is an inherited trait that helps an organism survive or reproduce. Adaptations can include both body parts and behaviors. The shape of an animal's mouth is one example of an adaptation. Animals' mouths can be adapted in different ways. For example, a large mouth with sharp teeth might help an animal tear through meat. A long, thin mouth might help an animal catch insects that live in holes. Animals that eat similar food often have similar mouths.",
    "solution":"Look at the picture of the sturgeon.\nThe sturgeon's mouth is located on the underside of its head and points downward. Its mouth is adapted for bottom feeding. The sturgeon uses its mouth to find food hidden in the sediment at the bottom of rivers, lakes, and the ocean.\nNow look at each animal. Figure out which animal has a similar adaptation.\nThe armored catfish's mouth is located on the underside of its head and points downward. Its mouth is adapted for bottom feeding.\nThe discus's mouth is not located on the underside of its head. Its mouth is not adapted for bottom feeding.",
    "split":"val",
    "path":"https:\/\/scienceqa-webdemo.s3.us-west-1.amazonaws.com\/extra\/7\/image.png"
  },
  {
    "question":"Is this a sentence fragment?\nDuring the construction of Mount Rushmore, approximately eight hundred million pounds of rock from the mountain to create the monument.",
    "choices":[
      "no",
      "yes"
    ],
    "answer":1,
    "hint":null,
    "image":null,
    "task":"yes-or-no",
    "grade":"grade12",
    "subject":"language science",
    "topic":"writing-strategies",
    "category":"Sentences, fragments, and run-ons",
    "skill":"Identify sentence fragments",
    "lecture":"A sentence is a group of words that expresses a complete thought. The band I'm in has been rehearsing daily because we have a concert in two weeks. A sentence fragment is a group of words that does not express a complete thought. Rehearsing daily because we have a concert in two weeks. This fragment is missing a subject. It doesn't tell who is rehearsing. The band I'm in. This fragment is missing a verb. It doesn't tell what the band I'm in is doing. Because we have a concert in two weeks. This fragment is missing an independent clause. It doesn't tell what happened because of the concert.",
    "solution":"This is a sentence fragment. It does not express a complete thought.\nDuring the construction of Mount Rushmore, approximately eight hundred million pounds of rock from the mountain to create the monument.\nHere is one way to fix the sentence fragment:\nDuring the construction of Mount Rushmore, approximately eight hundred million pounds of rock were removed from the mountain to create the monument.",
    "split":"val",
    "path":null
  },
  {
    "question":"Which of the following could Wendy's test show?",
    "choices":[
      "whether producing more insulin would help the bacteria grow faster",
      "whether different types of bacteria would need different nutrients to produce insulin",
      "whether she added enough nutrients to help the bacteria produce 20% more insulin"
    ],
    "answer":2,
    "hint":"People can use the engineering-design process to develop solutions to problems. One step in the process is testing if a potential solution meets the requirements of the design.\nThe passage below describes how the engineering-design process was used to test a solution to a problem. Read the passage. Then answer the question below.\n\nPeople with diabetes sometimes take a medicine made from insulin. Insulin can be made by a special type of bacteria. Wendy was a bioengineer who wanted to increase the amount of insulin that the bacteria produced by 20%. She read that giving the bacteria more nutrients could affect the amount of insulin they produced. So, Wendy gave extra nutrients to some of the bacteria. Then, she measured how much insulin those bacteria produced compared to bacteria that did not get extra nutrients.\nFigure: studying bacteria in a laboratory.",
    "image":"image.png",
    "task":"closed-choice",
    "grade":"grade7",
    "subject":"natural science",
    "topic":"science-and-engineering-practices",
    "category":"Engineering practices",
    "skill":"Evaluate tests of engineering-design solutions",
    "lecture":"People can use the engineering-design process to develop solutions to problems. One step in the process is testing if a potential solution meets the requirements of the design. How can you determine what a test can show? You need to figure out what was tested and what was measured. Imagine an engineer needs to design a bridge for a windy location. She wants to make sure the bridge will not move too much in high wind. So, she builds a smaller prototype, or model, of a bridge. Then, she exposes the prototype to high winds and measures how much the bridge moves. First, identify what was tested. A test can examine one design, or it may compare multiple prototypes to each other. In the test described above, the engineer tested a prototype of a bridge in high wind. Then, identify what the test measured. One of the criteria for the bridge was that it not move too much in high winds. The test measured how much the prototype bridge moved. Tests can show how well one or more designs meet the criteria. The test described above can show whether the bridge would move too much in high winds.",
    "solution":null,
    "split":"val",
    "path":"https:\/\/scienceqa-webdemo.s3.us-west-1.amazonaws.com\/extra\/13\/image.png"
  },
  {
    "question":"Which correctly shows the title of a play?",
    "choices":[
      "A breath of Fresh Air",
      "A Breath of Fresh Air"
    ],
    "answer":1,
    "hint":null,
    "image":null,
    "task":"closed-choice",
    "grade":"grade3",
    "subject":"language science",
    "topic":"capitalization",
    "category":"Formatting",
    "skill":"Capitalizing titles",
    "lecture":"In a title, capitalize the first word, the last word, and every important word in between. The Wind in the Willows James and the Giant Peach These words are not important in titles: Articles, a, an, the Short prepositions, such as at, by, for, in, of, on, to, up Coordinating conjunctions, such as and, but, or",
    "solution":"Capitalize the first word, the last word, and every important word in between. The word of is not important, so it should not be capitalized.\nThe correct title is A Breath of Fresh Air.",
    "split":"val",
    "path":null
  },
  {
    "question":"Does this passage describe the weather or the climate?",
    "choices":[
      "weather",
      "climate"
    ],
    "answer":1,
    "hint":"Figure: Chicago.\nChicago is known as The Windy City. But on average, the wind there only blows at about 10 miles per hour.\nHint: Weather is what the atmosphere is like at a certain place and time. Climate is the pattern of weather in a certain place.",
    "image":"image.png",
    "task":"closed-choice",
    "grade":"grade4",
    "subject":"natural science",
    "topic":"earth-science",
    "category":"Weather and climate",
    "skill":"Weather and climate around the world",
    "lecture":"The atmosphere is the layer of air that surrounds Earth. Both weather and climate tell you about the atmosphere. Weather is what the atmosphere is like at a certain place and time. Weather can change quickly. For example, the temperature outside your house might get higher throughout the day. Climate is the pattern of weather in a certain place. For example, summer temperatures in New York are usually higher than winter temperatures.",
    "solution":"Read the passage carefully.\nChicago is known as The Windy City. But on average, the wind there only blows at about 10 miles per hour.\nThe underlined part of the passage tells you about the usual wind patterns in Chicago. This passage does not describe what the weather is like on a particular day. So, this passage describes the climate.",
    "split":"val",
    "path":"https:\/\/scienceqa-webdemo.s3.us-west-1.amazonaws.com\/extra\/16\/image.png"
  },
  {
    "question":"Based on this information, what is Daffodil's phenotype for the horns trait?",
    "choices":[
      "not having horns",
      "having horns"
    ],
    "answer":0,
    "hint":"In a group of cows, some individuals have horns and others do not. In this group, the gene for the horns trait has two alleles. The allele for having horns (h) is recessive to the allele for not having horns (H).\nDaffodil is a cow from this group. Daffodil has the homozygous genotype HH for the horns gene.",
    "image":null,
    "task":"closed-choice",
    "grade":"grade7",
    "subject":"natural science",
    "topic":"biology",
    "category":"Genes to traits",
    "skill":"Genetics vocabulary: dominant and recessive",
    "lecture":"All organisms have pieces of hereditary material called genes, which are passed from parents to offspring. Genes contain instructions for building the parts of an organism. An organism's genes affect its observable traits, including its appearance, its behavior, and which diseases it may have. Genes may have different alleles, or forms, that can cause different versions of a trait. For example, flower color is a trait in pea plants. The gene for this trait has two possible alleles. Each allele is represented by an uppercase or lowercase letter. The allele F is for purple flowers, and the allele f is for white flowers. Each pea plant has two alleles for the flower color gene\u2014one allele inherited from each parent. An organism's genotype for a gene is its combination of alleles for that gene. So, a pea plant may have a genotype of FF, Ff, or ff for the flower color gene. An organism's phenotype for a trait is its observable version of that trait, which depends on the organism's combination of alleles. A pea plant may have a phenotype of purple flowers or white flowers for the flower color trait. Some traits, like flower color in pea plants, are controlled by a single gene. Most plants and animals have a genotype made up of two alleles for these traits. These two alleles determine whether an organism is homozygous or heterozygous for the gene. An organism with two identical alleles for a gene is homozygous for that gene. A pea plant with the genotype FF or ff is homozygous for the flower color gene. An organism with two different alleles for a gene is heterozygous for that gene. A pea plant with the genotype Ff is heterozygous for the flower color gene. The types of alleles in an organism's genotype determine the organism's phenotype. Some alleles have types called dominant and recessive. These two types can cause different versions of a trait to appear as the organism's phenotype. A dominant allele causes its version of the trait to appear even when the organism also has a recessive allele for the gene. In pea plants, the F allele, which causes purple flowers, is dominant over the f allele. A pea plant with at least one F allele will have the F allele's version of the flower color trait. So, a plant with the genotype FF or Ff will have purple flowers. A recessive allele causes its version of the trait to appear only when the organism does not have any dominant alleles for the gene. In pea plants, the f allele, which causes white flowers, is recessive to the F allele. A pea plant with only f alleles will have the f allele's version of the flower color trait. So, a plant with the genotype ff will have white flowers.",
    "solution":"Daffodil's genotype for the horns gene is HH. Daffodil's genotype of HH has only H allelles. The H allele is for not having horns. So, Daffodil's phenotype for the horns trait must be not having horns.\nTo check this answer, consider whether Daffodil's alleles are dominant or recessive. The allele for having horns (h) is recessive to the allele for not having horns (H). This means H is a dominant allele, and h is a recessive allele.\nDaffodil's genotype of HH has two dominant alleles. An organism with at least one dominant allele for a gene will have the dominant allele's version of the trait. So, Daffodil's phenotype for the horns trait must be not having horns.",
    "split":"val",
    "path":null
  },
  {
    "question":"Which animal's feet are also adapted for grabbing prey?",
    "choices":[
      "sable",
      "New Zealand falcon"
    ],
    "answer":1,
    "hint":"Bald eagles eat fish, mammals, and other birds. The 's feet are adapted for grabbing prey.\nFigure: bald eagle.",
    "image":"image.png",
    "task":"closed-choice",
    "grade":"grade5",
    "subject":"natural science",
    "topic":"biology",
    "category":"Adaptations",
    "skill":"Animal adaptations: feet and limbs",
    "lecture":"An adaptation is an inherited trait that helps an organism survive or reproduce. Adaptations can include both body parts and behaviors. The shape of an animal's feet is one example of an adaptation. Animals' feet can be adapted in different ways. For example, webbed feet might help an animal swim. Feet with thick fur might help an animal walk on cold, snowy ground.",
    "solution":"Look at the picture of the bald eagle.\nThe bald eagle has long toes with sharp claws. Its feet are adapted for grabbing prey. The sharp claws can help the bald eagle attack and kill its prey. The long toes can help it hold on to its prey.\nNow look at each animal. Figure out which animal has a similar adaptation.\nThe New Zealand falcon has long toes with sharp claws. Its feet are adapted for grabbing prey.\nThe sable has hoofed feet. Its feet are not adapted for grabbing prey. The sable uses its feet to walk and run on hard ground.",
    "split":"val",
    "path":"https:\/\/scienceqa-webdemo.s3.us-west-1.amazonaws.com\/extra\/28\/image.png"
  },
  {
    "question":"Is the following statement about our solar system true or false?\nJupiter's volume is more than 10,000 times as large as the volume of Mars.",
    "choices":[
      "true",
      "false"
    ],
    "answer":1,
    "hint":"Use the data to answer the question below.",
    "image":"image.png",
    "task":"true-or-false",
    "grade":"grade8",
    "subject":"natural science",
    "topic":"earth-science",
    "category":"Astronomy",
    "skill":"Analyze data to compare properties of planets",
    "lecture":"A planet's volume tells you the size of the planet. The primary composition of a planet is what the planet is made mainly of. In our solar system, planets are made mainly of rock, gas, or ice. The volume of a planet is a very large quantity. Large quantities such as this are often written in scientific notation. For example, the volume of Jupiter is 1,430,000,000,000,000 km^3. In scientific notation, Jupiter's volume is written as 1.43 x 10^15 km^3. To compare two numbers written in scientific notation, first compare their exponents. The bigger the exponent is, the bigger the number is. For example: 1.43 x 10^15 is larger than 1.43 x 10^12 If their exponents are equal, compare the first numbers. For example: 1.43 x 10^15 is larger than 1.25 x 10^15 To multiply a number written in scientific notation by a power of 10, write the multiple of 10 as 10 raised to an exponent. Then, add the exponents. For example: 1.43 x 10^15 \u00b7 1000 = 1.43 x 10^15 \u00b7 10^3 = 1.43 x 10^(15 + 3) = 1.43 x 10^18",
    "solution":"To determine if this statement is true, calculate the value of 10,000 times the volume of Mars.\nThen compare the result to the volume of Jupiter. Jupiter's volume is 1.43 x 10^15 km^3, which is less than 1.63 x 10^15 km^3. So, Jupiter's volume is less than 10,000 times as large as the volume of Mars.",
    "split":"val",
    "path":"https:\/\/scienceqa-webdemo.s3.us-west-1.amazonaws.com\/extra\/36\/image.png"
  },
  {
    "question":"What is the capital of Massachusetts?",
    "choices":[
      "Plymouth",
      "Albany",
      "Wichita",
      "Boston"
    ],
    "answer":3,
    "hint":null,
    "image":"image.png",
    "task":"closed-choice",
    "grade":"grade4",
    "subject":"social science",
    "topic":"geography",
    "category":"State capitals",
    "skill":"Identify state capitals of the Northeast",
    "lecture":null,
    "solution":"Boston is the capital of Massachusetts.",
    "split":"val",
    "path":"https:\/\/scienceqa-webdemo.s3.us-west-1.amazonaws.com\/extra\/45\/image.png"
  },
  {
    "question":"Complete the sentence so that it uses personification.\nA light spattering of raindrops fell upon the stadium, () the fans' cheeks.",
    "choices":[
      "landing on",
      "kissing"
    ],
    "answer":1,
    "hint":null,
    "image":null,
    "task":"closed-choice",
    "grade":"grade10",
    "subject":"language science",
    "topic":"writing-strategies",
    "category":"Creative techniques",
    "skill":"Use personification",
    "lecture":"Personification is giving human characteristics to nonhuman things. It is a figure of speech that can be used to make writing more interesting or to emphasize a point. The trees danced in the wind. The word danced describes the trees as if they were people. Unlike people, however, trees can't actually dance. Instead, the personification suggests that the trees are moving.",
    "solution":"Complete the sentence with the word kissing. It describes the raindrops as if they were people showing affection.",
    "split":"val",
    "path":null
  },
  {
    "question":"Complete the sentences.\nEarthquakes start () Earth's surface. During an earthquake, ().",
    "choices":[
      "above . . . the ground shakes",
      "above . . . the ground gets colder",
      "below . . . the ground shakes",
      "below . . . the ground gets colder"
    ],
    "answer":2,
    "hint":null,
    "image":null,
    "task":"closed-choice",
    "grade":"grade3",
    "subject":"natural science",
    "topic":"literacy-in-science",
    "category":"Earth events",
    "skill":"Changes to Earth's surface: earthquakes",
    "lecture":null,
    "solution":"When an earthquake happens, the ground shakes. The word earthquake comes from the words earth and quake. The word earth means ground, and the word quake means to shake.\nAll earthquakes start below Earth's surface.",
    "split":"val",
    "path":null
  },
  {
    "question":"Is Lithops bromfieldii made up of many cells?",
    "choices":[
      "yes",
      "no"
    ],
    "answer":0,
    "hint":"This organism is Lithops bromfieldii. It is a member of the plant kingdom.\nLithops bromfieldii lives in South Africa. Each L. bromfieldii is made up of two brown or gray leaves. Because of its unusual appearance, L. bromfieldii is sometimes called a living stone.",
    "image":"image.png",
    "task":"yes-or-no",
    "grade":"grade5",
    "subject":"natural science",
    "topic":"biology",
    "category":"Classification",
    "skill":"Describe, classify, and compare kingdoms",
    "lecture":"In the past, scientists classified living organisms into two groups: plants and animals. Over the past 300 years, scientists have discovered many more types of organisms. Today, many scientists classify organisms into six broad groups, called kingdoms. Organisms in each kingdom have specific traits. The table below shows some traits used to describe each kingdom. <br\/><br\/>  | Bacteria | Archaea | Protists | Fungi | Animals | Plants<br\/> How many cells do they have? | one | one | one or many | one or many | many | many<br\/> Do their cells have a nucleus? | no | no | yes | yes | yes | yes<br\/> Can their cells make food? | some species can | some species can | some species can | no | no | yes<br\/>",
    "solution":"Lithops bromfieldii is a plant. Plants are made up of many cells.",
    "split":"val",
    "path":"https:\/\/scienceqa-webdemo.s3.us-west-1.amazonaws.com\/extra\/55\/image.png"
  },
  {
    "question":"Which bird's beak is also adapted to tear through meat?",
    "choices":[
      "sand martin",
      "Cape vulture"
    ],
    "answer":1,
    "hint":"Red-tailed hawks eat fish, mammals, and other birds. The shape of the 's beak is adapted to tear through meat.\nFigure: red-tailed hawk.",
    "image":"image.png",
    "task":"closed-choice",
    "grade":"grade5",
    "subject":"natural science",
    "topic":"biology",
    "category":"Adaptations",
    "skill":"Animal adaptations: beaks, mouths, and necks",
    "lecture":"An adaptation is an inherited trait that helps an organism survive or reproduce. Adaptations can include both body parts and behaviors. The shape of a bird's beak is one example of an adaptation. Birds' beaks can be adapted in different ways. For example, a sharp hooked beak might help a bird tear through meat easily. A short, thick beak might help a bird break through a seed's hard shell. Birds that eat similar food often have similar beaks.",
    "solution":"Look at the picture of the red-tailed hawk.\nThe red-tailed hawk has a sharp hooked beak. Its beak is adapted to tear through meat. The sharp hook can help the red-tailed hawk cut the meat into pieces it can swallow.\nNow look at each bird. Figure out which bird has a similar adaptation.\nThe Cape vulture has a sharp hooked beak. Its beak is adapted to tear through meat.\nThe sand martin has a short, thin beak. Its beak is not adapted to tear through meat. The sand martin uses its beak to eat insects and other small invertebrates.",
    "split":"val",
    "path":"https:\/\/scienceqa-webdemo.s3.us-west-1.amazonaws.com\/extra\/60\/image.png"
  },
  {
    "question":"Which figure of speech is used in this text?\nAriel gazed at the ancient pug that seemed to sleep all day and noted, \"You're an energetic puppy!\"",
    "choices":[
      "idiom",
      "verbal irony"
    ],
    "answer":1,
    "hint":null,
    "image":null,
    "task":"closed-choice",
    "grade":"grade7",
    "subject":"language science",
    "topic":"figurative-language",
    "category":"Literary devices",
    "skill":"Classify figures of speech",
    "lecture":"Figures of speech are words or phrases that use language in a nonliteral or unusual way. They can make writing more expressive. Alliteration is the repetition of sounds at the beginning of nearby words. What a lucky little lady you are! An allusion is a brief reference to something or someone well known, often from history or literature. \"I'd better get home before I turn into a pumpkin!\" Lila remarked. An idiom is an expression that cannot be understood literally. Its meaning must be learned. The assignment was a piece of cake. A simile uses like or as to compare two things that are not actually alike. The cat's fur was as dark as the night. A metaphor compares two things that are not actually alike without using like or as. The snow formed a blanket over the town. Onomatopoeia involves using a word that expresses a sound. The scrambled eggs hit the floor with a splat. Personification is giving human characteristics to nonhuman things. The trees danced in the wind. A pun involves using a word or phrase in a humorous way that suggests more than one meaning. A great new broom is sweeping the nation. Verbal irony involves saying one thing but implying something very different. People often use verbal irony when they are being sarcastic. Olivia seems thrilled that her car keeps breaking down. Each breakdown is as enjoyable as a punch to the face.",
    "solution":"The text uses verbal irony, which involves saying one thing but implying something very different.\nAn energetic puppy shows verbal irony because an old, exhausted dog is far from an energetic puppy.",
    "split":"val",
    "path":null
  },
  {
    "question":"What is the source of the allusion in the sentence below?\nMichael dropped out of college to travel the world, but a year later, the prodigal son returned home and re-enrolled.",
    "choices":[
      "the Bible",
      "British history"
    ],
    "answer":0,
    "hint":null,
    "image":null,
    "task":"closed-choice",
    "grade":"grade7",
    "subject":"language science",
    "topic":"figurative-language",
    "category":"Literary devices",
    "skill":"Recall the source of an allusion",
    "lecture":"An allusion is a brief mention of something or someone well known, often from mythology, history, or literature. An allusion lets you reference ideas from an entire story in just a few words. \"I'd better get home before I turn into a pumpkin!\" Lila remarked. Here, Lila alludes to the fairy tale \"Cinderella,\" in which Cinderella must leave the ball before the coach that brought her transforms into a pumpkin. The allusion shows that Lila must depart immediately.",
    "solution":"The source of the allusion prodigal son is the Bible.\nIn a Biblical parable, the prodigal son irresponsibly spends the inheritance given to him by his father. When he returns home, he expects to be shamed, but his father forgives him.\nThe allusion prodigal son means a person who behaves recklessly but later makes a repentant return.",
    "split":"val",
    "path":null
  },
  {
    "question":"What is the volume of a car's gas tank?",
    "choices":[
      "40 milliliters",
      "40 liters"
    ],
    "answer":1,
    "hint":"Select the better estimate.",
    "image":null,
    "task":"closed-choice",
    "grade":"grade5",
    "subject":"natural science",
    "topic":"units-and-measurement",
    "category":"Units and measurement",
    "skill":"Choose metric units of volume",
    "lecture":"Measurements are written with both a number and a unit. The unit comes after the number. The unit shows what the number means. Volume is a measurement of how much space something takes up. There are many different units of volume. When you are using metric units, volume may be written in units of milliliters or liters. There are 1,000 milliliters in 1 liter. So, 1 milliliter is much less than 1 liter. A raindrop has a volume of about 20 milliliters, while a large soda bottle has a volume of 2 liters. The flask shown here measures volumes up to 500 milliliters.",
    "solution":"The better estimate for the volume of a car's gas tank is 40 liters.\n40 milliliters is too little.",
    "split":"val",
    "path":null
  },
  {
    "question":"Which of these states is farthest north?",
    "choices":[
      "Alabama",
      "Idaho",
      "South Carolina",
      "Oklahoma"
    ],
    "answer":1,
    "hint":null,
    "image":"image.png",
    "task":"closed-choice",
    "grade":"grade2",
    "subject":"social science",
    "topic":"geography",
    "category":"Geography",
    "skill":"Read a map: cardinal directions",
    "lecture":"Maps have four cardinal directions, or main directions. Those directions are north, south, east, and west. A compass rose is a set of arrows that point to the cardinal directions. A compass rose usually shows only the first letter of each cardinal direction. The north arrow points to the North Pole. On most maps, north is at the top of the map.",
    "solution":"To find the answer, look at the compass rose. Look at which way the north arrow is pointing. Idaho is farthest north.",
    "split":"val",
    "path":"https:\/\/scienceqa-webdemo.s3.us-west-1.amazonaws.com\/extra\/72\/image.png"
  },
  {
    "question":"What information supports the conclusion that Austen acquired this trait?",
    "choices":[
      "Austen can cook food over a fire.",
      "Austen learned how to build a fire at summer camp."
    ],
    "answer":1,
    "hint":"Read the description of a trait.\nAusten knows how to build a fire.",
    "image":null,
    "task":"closed-choice",
    "grade":"grade6",
    "subject":"natural science",
    "topic":"biology",
    "category":"Genes to traits",
    "skill":"Inherited and acquired traits: use evidence to support a statement",
    "lecture":"Organisms, including people, have both inherited and acquired traits. Inherited and acquired traits are gained in different ways. Inherited traits are passed down from biological parents to their offspring through genes. Genes are pieces of hereditary material that contain the instructions that affect inherited traits. Offspring receive their genes, and therefore gain their inherited traits, from their biological parents. Inherited traits do not need to be learned. Acquired traits are gained during a person's life. Some acquired traits, such as riding a bicycle, are gained by learning. Other acquired traits, such as scars, are caused by the environment. Parents do not pass acquired traits down to their offspring.",
    "solution":null,
    "split":"val",
    "path":null
  },
  {
    "question":"Which property do these three objects have in common?",
    "choices":[
      "bouncy",
      "hard",
      "soft"
    ],
    "answer":2,
    "hint":"Select the best answer.",
    "image":"image.png",
    "task":"closed-choice",
    "grade":"grade4",
    "subject":"natural science",
    "topic":"physics",
    "category":"Materials",
    "skill":"Compare properties of objects",
    "lecture":"An object has different properties. A property of an object can tell you how it looks, feels, tastes, or smells. Properties can also tell you how an object will behave when something happens to it. Different objects can have properties in common. You can use these properties to put objects into groups. Grouping objects by their properties is called classification.",
    "solution":"Look at each object.\nFor each object, decide if it has that property.\nA hard object does not change shape when pressed or squeezed. None of the objects are hard.\nA bouncy object will bounce back from the floor if you drop it. None of the objects are bouncy.\nA soft object changes shape when pressed or squeezed. All three objects are soft.\nThe property that all three objects have in common is soft.",
    "split":"val",
    "path":"https:\/\/scienceqa-webdemo.s3.us-west-1.amazonaws.com\/extra\/77\/image.png"
  },
  {
    "question":"Which of the following is true about seeds?",
    "choices":[
      "Seeds come in many shapes. But all seeds are black.",
      "Seeds can come in many shapes and colors.",
      "Seeds come in many colors. But all seeds are round."
    ],
    "answer":1,
    "hint":null,
    "image":null,
    "task":"closed-choice",
    "grade":"grade4",
    "subject":"natural science",
    "topic":"biology",
    "category":"Plants",
    "skill":"Describe and construct flowering plant life cycles",
    "lecture":"Many plants have flowers. These plants can use their flowers to reproduce, or make new plants like themselves. How do plants use their flowers to reproduce? First, the male part of the flower makes pollen, and the female part makes eggs. Animals, wind, or water can move pollen. Pollination is what happens when pollen is moved to the female part of the flower. After pollination, sperm from the pollen can combine with the eggs. This is called fertilization. The fertilized eggs grow into seeds. The fruit grows around the seeds. Later, a seed can fall out of the fruit. It can germinate, or start to grow into a new plant.",
    "solution":"Seeds can be big or small. This coconut seed is big.\nSeeds can be many different shapes. These maple seeds are long and flat.\nSeeds can be many different colors. These mustard seeds are yellow.",
    "split":"val",
    "path":null
  },
  {
    "question":"Identify the question that Tyrone and Quincy's experiment can best answer.",
    "choices":[
      "Do ping pong balls stop rolling along the ground sooner after being launched from a 30\u00b0 angle or a 45\u00b0 angle?",
      "Do ping pong balls travel farther when launched from a 30\u00b0 angle compared to a 45\u00b0 angle?"
    ],
    "answer":1,
    "hint":"The passage below describes an experiment. Read the passage and then follow the instructions below.\n\nTyrone placed a ping pong ball in a catapult, pulled the catapult's arm back to a 45\u00b0 angle, and launched the ball. Then, Tyrone launched another ping pong ball, this time pulling the catapult's arm back to a 30\u00b0 angle. With each launch, his friend Quincy measured the distance between the catapult and the place where the ball hit the ground. Tyrone and Quincy repeated the launches with ping pong balls in four more identical catapults. They compared the distances the balls traveled when launched from a 45\u00b0 angle to the distances the balls traveled when launched from a 30\u00b0 angle.\nFigure: a catapult for launching ping pong balls.",
    "image":"image.png",
    "task":"closed-choice",
    "grade":"grade8",
    "subject":"natural science",
    "topic":"science-and-engineering-practices",
    "category":"Designing experiments",
    "skill":"Identify the experimental question",
    "lecture":"Experiments can be designed to answer specific questions. How can you identify the questions that a certain experiment can answer? In order to do this, you need to figure out what was tested and what was measured during the experiment. Imagine an experiment with two groups of daffodil plants. One group of plants was grown in sandy soil, and the other was grown in clay soil. Then, the height of each plant was measured. First, identify the part of the experiment that was tested. The part of an experiment that is tested usually involves the part of the experimental setup that is different or changed. In the experiment described above, each group of plants was grown in a different type of soil. So, the effect of growing plants in different soil types was tested. Then, identify the part of the experiment that was measured. The part of the experiment that is measured may include measurements and calculations. In the experiment described above, the heights of the plants in each group were measured. Experiments can answer questions about how the part of the experiment that is tested affects the part that is measured. So, the experiment described above can answer questions about how soil type affects plant height. Examples of questions that this experiment can answer include: Does soil type affect the height of daffodil plants? Do daffodil plants in sandy soil grow taller than daffodil plants in clay soil? Are daffodil plants grown in sandy soil shorter than daffodil plants grown in clay soil?",
    "solution":null,
    "split":"val",
    "path":"https:\/\/scienceqa-webdemo.s3.us-west-1.amazonaws.com\/extra\/81\/image.png"
  },
  {
    "question":"Which animal's mouth is also adapted for bottom feeding?",
    "choices":[
      "clown triggerfish",
      "sturgeon"
    ],
    "answer":1,
    "hint":"Armored catfish eat plants and small invertebrates. They are bottom feeders. Bottom feeders find their food at the bottom of rivers, lakes, and the ocean.\nThe catfish's mouth is located on the underside of its head and points downward. Its mouth is adapted for bottom feeding.\nFigure: armored catfish.",
    "image":"image.png",
    "task":"closed-choice",
    "grade":"grade3",
    "subject":"natural science",
    "topic":"biology",
    "category":"Adaptations",
    "skill":"Animal adaptations: beaks, mouths, and necks",
    "lecture":"An adaptation is an inherited trait that helps an organism survive or reproduce. Adaptations can include both body parts and behaviors. The shape of an animal's mouth is one example of an adaptation. Animals' mouths can be adapted in different ways. For example, a large mouth with sharp teeth might help an animal tear through meat. A long, thin mouth might help an animal catch insects that live in holes. Animals that eat similar food often have similar mouths.",
    "solution":"Look at the picture of the armored catfish.\nThe armored catfish's mouth is located on the underside of its head and points downward. Its mouth is adapted for bottom feeding. The armored catfish uses its mouth to find food hidden in the sediment at the bottom of rivers and streams.\nNow look at each animal. Figure out which animal has a similar adaptation.\nThe sturgeon's mouth is located on the underside of its head and points downward. Its mouth is adapted for bottom feeding.\nThe clown triggerfish's mouth is not located on the underside of its head. Its mouth is not adapted for bottom feeding.",
    "split":"val",
    "path":"https:\/\/scienceqa-webdemo.s3.us-west-1.amazonaws.com\/extra\/82\/image.png"
  },
  {
    "question":"What is the temperature of the air on a cold, rainy day?",
    "choices":[
      "41\u00b0C",
      "41\u00b0F"
    ],
    "answer":1,
    "hint":"Select the better estimate.",
    "image":null,
    "task":"closed-choice",
    "grade":"grade6",
    "subject":"natural science",
    "topic":"units-and-measurement",
    "category":"Units and measurement",
    "skill":"Estimate temperatures",
    "lecture":"Measurements are written with both a number and a unit. The unit comes after the number. The unit shows what the number means. Temperature can be written with units of degrees Fahrenheit (\u00b0F) or Celsius (\u00b0C). Use the list below to compare the two units. <br\/><br\/> 212\u00b0F | Water boils | 100\u00b0C<br\/> 98.6\u00b0F | Body temperature | 37\u00b0C<br\/> 68\u00b0F | Room temperature | 20\u00b0C<br\/> 32\u00b0F | Water freezes | 0\u00b0C<br\/>",
    "solution":"The better estimate for the temperature of the air on a cold, rainy day is 41\u00b0F.\n41\u00b0C is too hot.",
    "split":"val",
    "path":null
  },
  {
    "question":"Which property do these two objects have in common?",
    "choices":[
      "salty",
      "sour"
    ],
    "answer":1,
    "hint":"Select the better answer.",
    "image":"image.png",
    "task":"closed-choice",
    "grade":"grade2",
    "subject":"natural science",
    "topic":"physics",
    "category":"Materials",
    "skill":"Compare properties of objects",
    "lecture":"An object has different properties. A property of an object can tell you how it looks, feels, tastes, or smells. Different objects can have the same properties. You can use these properties to put objects into groups.",
    "solution":"Look at each object.\nFor each object, decide if it has that property.\nA lemon has a sour taste. Both objects are sour.\nPotato chips have a salty taste. The lime is not salty.\nThe property that both objects have in common is sour.",
    "split":"val",
    "path":"https:\/\/scienceqa-webdemo.s3.us-west-1.amazonaws.com\/extra\/101\/image.png"
  },
  {
    "question":"Based on the arrows, which of the following organisms is a consumer?",
    "choices":[
      "barren-ground caribou",
      "bear sedge"
    ],
    "answer":0,
    "hint":"Below is a food web from a tundra ecosystem in Nunavut, a territory in Northern Canada.\nA food web models how the matter eaten by organisms moves through an ecosystem. The arrows in a food web represent how matter moves between organisms in an ecosystem.",
    "image":"image.png",
    "task":"closed-choice",
    "grade":"grade4",
    "subject":"natural science",
    "topic":"biology",
    "category":"Ecosystems",
    "skill":"Interpret food webs",
    "lecture":"A food web is a model. A food web shows where organisms in an ecosystem get their food. Models can make things in nature easier to understand because models can represent complex things in a simpler way. If a food web showed every organism in an ecosystem, the food web would be hard to understand. So, each food web shows how some organisms in an ecosystem can get their food. Arrows show how matter moves. A food web has arrows that point from one organism to another. Each arrow shows the direction that matter moves when one organism eats another organism. An arrow starts from the organism that is eaten. The arrow points to the organism that is doing the eating. An organism in a food web can have more than one arrow pointing from it. This shows that the organism is eaten by more than one other organism in the food web. An organism in a food web can also have more than one arrow pointing to it. This shows that the organism eats more than one other organism in the food web.",
    "solution":"Consumers eat other organisms. So, there are arrows in a food web that point from other organisms to consumers.\nThe barren-ground caribou has an arrow pointing to it from the lichen. So, the barren-ground caribou is a consumer.\nThe bear sedge does not have any arrows pointing to it. So, the bear sedge is a producer, not a consumer.",
    "split":"val",
    "path":"https:\/\/scienceqa-webdemo.s3.us-west-1.amazonaws.com\/extra\/106\/image.png"
  },
  {
    "question":"Compare the motion of three ships. Which ship was moving at the lowest speed?",
    "choices":[
      "a ship that moved 555kilometers west in 10hours",
      "a ship that moved 95kilometers south in 10hours",
      "a ship that moved 460kilometers south in 10hours"
    ],
    "answer":1,
    "hint":null,
    "image":null,
    "task":"closed-choice",
    "grade":"grade3",
    "subject":"natural science",
    "topic":"physics",
    "category":"Force and motion",
    "skill":"Compare the speeds of moving objects",
    "lecture":"An object's speed tells you how fast the object is moving. Speed depends on both distance and time. Distance tells you how far the object has moved. One unit used to measure distance is the kilometer. Time tells you how long the object has spent moving. One unit used to measure time is the hour. Think about objects moving for the same amount of time. The object that is moving the slowest will go the shortest distance in that time. It is moving at the lowest speed.",
    "solution":"Look at the distance each ship moved and the time it took to move that distance. The direction each ship moved does not affect its speed.\nNotice that each ship moved for 10 hours. The ship that moved 95 kilometers moved the shortest distance in that time. So, that ship must have moved at the lowest speed.",
    "split":"val",
    "path":null
  },
  {
    "question":"Based on this information, what is Sasha's phenotype for the fur length trait?",
    "choices":[
      "Ff",
      "short fur"
    ],
    "answer":1,
    "hint":"In a group of dogs, some individuals have short fur and others have long fur. In this group, the gene for the fur length trait has two alleles. The allele F is for short fur, and the allele f is for long fur.\nSasha, a dog from this group, has short fur. Sasha has one allele for short fur and one allele for long fur.",
    "image":null,
    "task":"closed-choice",
    "grade":"grade7",
    "subject":"natural science",
    "topic":"biology",
    "category":"Genes to traits",
    "skill":"Genetics vocabulary: genotype and phenotype",
    "lecture":"All organisms have pieces of hereditary material called genes, which are passed from parents to offspring. Genes contain instructions for building the parts of an organism. An organism's genes affect its observable traits, including its appearance, its behavior, and which diseases it may have. Genes may have different alleles, or forms, that can cause different versions of a trait. For example, flower color is a trait in pea plants. The gene for this trait has two possible alleles. Each allele is represented by an uppercase or lowercase letter. The allele F is for purple flowers, and the allele f is for white flowers. Each pea plant has two alleles for the flower color gene\u2014one allele inherited from each parent. An organism's genotype for a gene is its combination of alleles for that gene. So, a pea plant may have a genotype of FF, Ff, or ff for the flower color gene. An organism's phenotype for a trait is its observable version of that trait, which depends on the organism's combination of alleles. A pea plant may have a phenotype of purple flowers or white flowers for the flower color trait.",
    "solution":"An organism's phenotype for a trait is its observable version of that trait. Sasha's observable version of the fur length trait is short fur. So, Sasha's phenotype for the fur length trait is short fur.",
    "split":"val",
    "path":null
  },
  {
    "question":"Which is a compound sentence?",
    "choices":[
      "Those carpenters use wood to build stairways and doorframes.",
      "Our dog Rusty had rolled around in the mud, so we gave him a bath."
    ],
    "answer":1,
    "hint":null,
    "image":null,
    "task":"closed-choice",
    "grade":"grade4",
    "subject":"language science",
    "topic":"grammar",
    "category":"Sentences, fragments, and run-ons",
    "skill":"Is the sentence simple or compound?",
    "lecture":"A simple sentence is a sentence with only one subject and predicate. The pitcher threw the ball to first base. A compound sentence is two simple sentences joined by a comma and a conjunction such as and, but, or, or so. The pitcher threw the ball, and the batter hit it. Some simple sentences have a compound subject or a compound predicate, but they are not compound sentences. Anna and James will watch the fireworks tonight. This simple sentence has a compound subject, Anna and James. The singers bowed and walked off the stage. This simple sentence has a compound predicate, bowed and walked off the stage. Some simple sentences have introductory phrases, but they are not compound sentences. The introductory phrase is part of the predicate. In the winter, Farmer Ben wears his heavy coat. This is a simple sentence. There is one subject, Farmer Ben, and one predicate, wears his heavy coat in the winter.",
    "solution":"The first sentence is the compound sentence. It is made up of two simple sentences joined by a comma and the conjunction so.\nOur dog Rusty had rolled around in the mud, so we gave him a bath.",
    "split":"val",
    "path":null
  },
  {
    "question":"What is the expected ratio of offspring with black eyes to offspring with red eyes? Choose the most likely ratio.",
    "choices":[
      "1:3",
      "2:2",
      "4:0",
      "3:1",
      "0:4"
    ],
    "answer":2,
    "hint":"In a group of koi fish, some individuals have red eyes and others have black eyes. In this group, the gene for the eye color trait has two alleles. The allele for red eyes (E) is dominant over the allele for black eyes (e).\nThis Punnett square shows a cross between two koi fish.",
    "image":"image.png",
    "task":"closed-choice",
    "grade":"grade8",
    "subject":"natural science",
    "topic":"biology",
    "category":"Genes to traits",
    "skill":"Use Punnett squares to calculate ratios of offspring types",
    "lecture":"Offspring phenotypes: dominant or recessive? How do you determine an organism's phenotype for a trait? Look at the combination of alleles in the organism's genotype for the gene that affects that trait. Some alleles have types called dominant and recessive. These two types can cause different versions of the trait to appear as the organism's phenotype. If an organism's genotype has at least one dominant allele for a gene, the organism's phenotype will be the dominant allele's version of the gene's trait. If an organism's genotype has only recessive alleles for a gene, the organism's phenotype will be the recessive allele's version of the gene's trait. A Punnett square shows what types of offspring a cross can produce. The expected ratio of offspring types compares how often the cross produces each type of offspring, on average. To write this ratio, count the number of boxes in the Punnett square representing each type. For example, consider the Punnett square below. <br\/><br\/>  | F | f<br\/> F | FF | Ff<br\/> f | Ff | ff<br\/> <br\/> There is 1 box with the genotype FF and 2 boxes with the genotype Ff. So, the expected ratio of offspring with the genotype FF to those with Ff is 1:2.",
    "solution":"To determine how many boxes in the Punnett square represent offspring with black eyes or red eyes, consider whether each phenotype is the dominant or recessive allele's version of the eye color trait. The question tells you that the E allele, which is for red eyes, is dominant over the e allele, which is for black eyes.\nBlack eyes is the recessive allele's version of the eye color trait. A koi fish with the recessive version of the eye color trait must have only recessive alleles for the eye color gene. So, offspring with black eyes must have the genotype ee.\nAll 4 boxes in the Punnett square have the genotype ee.\nRed eyes is the dominant allele's version of the eye color trait. A koi fish with the dominant version of the eye color trait must have at least one dominant allele for the eye color gene. So, offspring with red eyes must have the genotype EE or Ee.\nThere are 0 boxes in the Punnett square with the genotype EE or Ee.\nSo, the expected ratio of offspring with black eyes to offspring with red eyes is 4:0. This means that, based on the Punnett square, this cross will always produce offspring with black eyes. This cross is expected to never produce offspring with red eyes.",
    "split":"val",
    "path":"https:\/\/scienceqa-webdemo.s3.us-west-1.amazonaws.com\/extra\/124\/image.png"
  },
  {
    "question":"The shopper lifts each bag at the same speed. Which bag is lifted with a larger force?",
    "choices":[
      "a bag holding 4 pounds of food",
      "a bag holding 5 pounds of food"
    ],
    "answer":1,
    "hint":"A shopper is buying food at the store. He fills two shopping bags. The shopping bags are the same size and shape.",
    "image":null,
    "task":"closed-choice",
    "grade":"grade2",
    "subject":"natural science",
    "topic":"physics",
    "category":"Force and motion",
    "skill":"How do mass and force affect motion?",
    "lecture":"A force is a push or a pull. A force can make an object start moving or stop an object that is moving. A force can also make an object speed up, slow down, or change direction. Forces can be different sizes. Think about trying to move a heavy object and a light object. Imagine you want to move them at the same speed. You will need to use a larger force to move the heavy object.",
    "solution":"Look for the shopping bag that is heavier.\nA shopping bag holding 5 pounds of food is heavier than a shopping bag holding 4 pounds of food. So, the bag holding 5 pounds needs a larger force to start moving upward at the same speed as the other bag.",
    "split":"val",
    "path":null
  },
  {
    "question":"What information supports the conclusion that Rosa inherited this trait?",
    "choices":[
      "Rosa's hair is the same color as her brown eyes.",
      "Rosa's father has brown eyes. He passed this trait down to Rosa."
    ],
    "answer":1,
    "hint":"Read the description of a trait.\nRosa has brown eyes.",
    "image":null,
    "task":"closed-choice",
    "grade":"grade4",
    "subject":"natural science",
    "topic":"biology",
    "category":"Traits and heredity",
    "skill":"Inherited and acquired traits: use evidence to support a statement",
    "lecture":"Organisms, including people, have both inherited and acquired traits. Inherited and acquired traits are gained in different ways. Inherited traits are passed down through families. Children gain these traits from their parents. Inherited traits do not need to be learned. Acquired traits are gained during a person's life. Some acquired traits, such as riding a bicycle, are gained by learning. Other acquired traits, such as scars, are caused by the environment.",
    "solution":null,
    "split":"val",
    "path":null
  },
  {
    "question":"Identify the question that Reba and Donald's experiment can best answer.",
    "choices":[
      "Does Reba's snowboard slide down a hill in less time when it has a layer of wax or when it does not have a layer of wax?",
      "Does Reba's snowboard slide down a hill in less time when it has a thin layer of wax or a thick layer of wax?"
    ],
    "answer":0,
    "hint":"The passage below describes an experiment. Read the passage and then follow the instructions below.\n\nReba applied a thin layer of wax to the underside of her snowboard and rode the board straight down a hill. Then, she removed the wax and rode the snowboard straight down the hill again. She repeated the rides four more times, alternating whether she rode with a thin layer of wax on the board or not. Her friend Donald timed each ride. Reba and Donald calculated the average time it took to slide straight down the hill on the snowboard with wax compared to the average time on the snowboard without wax.\nFigure: snowboarding down a hill.",
    "image":"image.png",
    "task":"closed-choice",
    "grade":"grade6",
    "subject":"natural science",
    "topic":"science-and-engineering-practices",
    "category":"Designing experiments",
    "skill":"Identify the experimental question",
    "lecture":"Experiments can be designed to answer specific questions. How can you identify the questions that a certain experiment can answer? In order to do this, you need to figure out what was tested and what was measured during the experiment. Imagine an experiment with two groups of daffodil plants. One group of plants was grown in sandy soil, and the other was grown in clay soil. Then, the height of each plant was measured. First, identify the part of the experiment that was tested. The part of an experiment that is tested usually involves the part of the experimental setup that is different or changed. In the experiment described above, each group of plants was grown in a different type of soil. So, the effect of growing plants in different soil types was tested. Then, identify the part of the experiment that was measured. The part of the experiment that is measured may include measurements and calculations. In the experiment described above, the heights of the plants in each group were measured. Experiments can answer questions about how the part of the experiment that is tested affects the part that is measured. So, the experiment described above can answer questions about how soil type affects plant height. Examples of questions that this experiment can answer include: Does soil type affect the height of daffodil plants? Do daffodil plants in sandy soil grow taller than daffodil plants in clay soil? Are daffodil plants grown in sandy soil shorter than daffodil plants grown in clay soil?",
    "solution":null,
    "split":"val",
    "path":"https:\/\/scienceqa-webdemo.s3.us-west-1.amazonaws.com\/extra\/148\/image.png"
  },
  {
    "question":"Which term matches the picture?",
    "choices":[
      "appendicular skeleton",
      "axial skeleton"
    ],
    "answer":1,
    "hint":"Read the text.\nYou may think of the human skeleton as one big collection of bones (206 to be exact), but it actually consists of two parts: the axial skeleton and the appendicular skeleton. The axial skeleton is made up of the bones and cartilage of the head and torso, including the skull, vertebral column, and rib cage. It protects most of our vital organs, like the brain and heart, and supports the weight of our bodies. In contrast, the bones in our appendicular skeleton allow us to move. They include the bone and cartilage in our limbs, like the bones in our arms and feet.",
    "image":"image.png",
    "task":"closed-choice",
    "grade":"grade8",
    "subject":"language science",
    "topic":"word-study",
    "category":"Domain-specific vocabulary",
    "skill":"Determine the meaning of domain-specific words with pictures",
    "lecture":null,
    "solution":"The axial skeleton is the part the human skeleton that makes up the head and torso. It includes the skull, vertebral column, and rib cage.",
    "split":"val",
    "path":"https:\/\/scienceqa-webdemo.s3.us-west-1.amazonaws.com\/extra\/150\/image.png"
  },
  {
    "question":"Which logical fallacy is used in the text?\nDid you really vote for Richard as class treasurer? Didn't you hear that his uncle was imprisoned for embezzling $1.5 million?",
    "choices":[
      "circular reasoning: an argument that supports a claim with the claim itself",
      "guilt by association: a negative association intended to discredit someone or something"
    ],
    "answer":1,
    "hint":null,
    "image":null,
    "task":"closed-choice",
    "grade":"grade8",
    "subject":"language science",
    "topic":"writing-strategies",
    "category":"Developing and supporting arguments",
    "skill":"Classify logical fallacies",
    "lecture":"A strong argument uses valid reasoning and logic in support of a claim. When an argument or claim introduces irrelevant information or misrepresents the issues at hand, it may be committing a logical fallacy. Logical fallacies can hurt a writer's credibility and can lead readers to draw false conclusions. A logical fallacy may present irrelevant information: <br\/><br\/> Fallacy | Description<br\/> ad hominem | a personal attack meant to discredit one's opponent<br\/> appeal to nature | an argument that assumes the natural choice is always the best choice<br\/> bandwagon fallacy | an argument that assumes the popular choice is always the best choice<br\/> circular reasoning | an argument that supports a claim with the claim itself<br\/> guilt by association | an unfair negative association with another person or group that is intended to discredit someone or something<br\/> red herring | the use of a completely unrelated topic in support of a claim<br\/> <br\/> A logical fallacy may misrepresent the issues at hand: <br\/><br\/> Fallacy | Description<br\/> false causation | the assumption that because two things happened together, one caused the other<br\/> false dichotomy | an argument that presents only two choices when more options exist<br\/> hasty generalization | a very broad claim based on very little evidence<br\/> straw man | a misrepresentation of an opponent's position that makes it easier to argue against<br\/>",
    "solution":"The text argues that Richard can't be trusted with money, because his uncle embezzled money. However, even though his uncle couldn't be trusted with money, that doesn't necessarily mean that Richard can't be trusted with it. This illustrates a type of logical fallacy known as guilt by association.",
    "split":"val",
    "path":null
  },
  {
    "question":"Does this passage describe the weather or the climate?",
    "choices":[
      "climate",
      "weather"
    ],
    "answer":1,
    "hint":"Figure: Malaysia.\nMalaysia is located in Southeast Asia. The arrival of a storm brought dark clouds on the first day of June.\nHint: Weather is what the atmosphere is like at a certain place and time. Climate is the pattern of weather in a certain place.",
    "image":"image.png",
    "task":"closed-choice",
    "grade":"grade6",
    "subject":"natural science",
    "topic":"earth-science",
    "category":"Weather and climate",
    "skill":"Weather and climate around the world",
    "lecture":"The atmosphere is the layer of air that surrounds Earth. Both weather and climate tell you about the atmosphere. Weather is what the atmosphere is like at a certain place and time. Weather can change quickly. For example, the temperature outside your house might get higher throughout the day. Climate is the pattern of weather in a certain place. For example, summer temperatures in New York are usually higher than winter temperatures.",
    "solution":"Read the passage carefully.\nMalaysia is located in Southeast Asia. The arrival of a storm brought dark clouds on the first day of June.\nThe underlined part of the passage tells you about the clouds seen in Malaysia on June 1. This passage describes the atmosphere at a certain place and time. So, this passage describes the weather.",
    "split":"val",
    "path":"https:\/\/scienceqa-webdemo.s3.us-west-1.amazonaws.com\/extra\/160\/image.png"
  },
  {
    "question":"Complete the sentence.\nSalt and vinegar removing tarnish from a penny is a ().",
    "choices":[
      "physical change",
      "chemical change"
    ],
    "answer":1,
    "hint":null,
    "image":null,
    "task":"closed-choice",
    "grade":"grade6",
    "subject":"natural science",
    "topic":"chemistry",
    "category":"Chemical reactions",
    "skill":"Compare physical and chemical changes",
    "lecture":"Matter is made of very small particles called atoms. Atoms can be linked together by chemical bonds. When two or more atoms link together, they form a molecule. In a chemical change, the chemical bonds in the molecules break. The atoms then link together to form new molecules. The types of molecules in matter before and after a chemical change are always different. Burning a piece of paper is a chemical change. As paper burns, paper molecules react with oxygen molecules in the air. This reaction breaks the chemical bonds in the molecules. The atoms then relink and form different molecules. For example, carbon dioxide molecules are created when paper burns. In a physical change, chemical bonds do not break. The types of molecules in matter before and after a physical change are always the same. A change of state is a type of physical change. For example, water vaporizing is a physical change. Liquid water and water vapor are made of the same type of matter: water.",
    "solution":"Salt and vinegar removing tarnish from a penny is a chemical change. The salt and vinegar change the tarnish into a different type of matter that can be easily wiped away. This makes the penny look shiny again.",
    "split":"val",
    "path":null
  },
  {
    "question":"Does this passage describe the weather or the climate?",
    "choices":[
      "climate",
      "weather"
    ],
    "answer":1,
    "hint":"Figure: Lhasa.\nLhasa is a city in the high mountains of Tibet. The winds there were blowing at 30 miles per hour this morning.\nHint: Weather is what the atmosphere is like at a certain place and time. Climate is the pattern of weather in a certain place.",
    "image":"image.png",
    "task":"closed-choice",
    "grade":"grade4",
    "subject":"natural science",
    "topic":"earth-science",
    "category":"Weather and climate",
    "skill":"Weather and climate around the world",
    "lecture":"The atmosphere is the layer of air that surrounds Earth. Both weather and climate tell you about the atmosphere. Weather is what the atmosphere is like at a certain place and time. Weather can change quickly. For example, the temperature outside your house might get higher throughout the day. Climate is the pattern of weather in a certain place. For example, summer temperatures in New York are usually higher than winter temperatures.",
    "solution":"Read the passage carefully.\nLhasa is a city in the high mountains of Tibet. The winds there were blowing at 30 miles per hour this morning.\nThe underlined part of the passage tells you about the wind speed in Lhasa this morning. This passage describes the atmosphere at a certain place and time. So, this passage describes the weather.",
    "split":"val",
    "path":"https:\/\/scienceqa-webdemo.s3.us-west-1.amazonaws.com\/extra\/165\/image.png"
  },
  {
    "question":"Would you find the word import on a dictionary page with the following guide words?\nill - industry",
    "choices":[
      "no",
      "yes"
    ],
    "answer":1,
    "hint":null,
    "image":null,
    "task":"yes-or-no",
    "grade":"grade5",
    "subject":"language science",
    "topic":"reference-skills",
    "category":"Reference skills",
    "skill":"Use guide words",
    "lecture":"Guide words appear on each page of a dictionary. They tell you the first word and last word on the page. The other words on the page come between the guide words in alphabetical order. To put words in alphabetical order, put them in order by their first letters. If the first letters are the same, look at the second letters. If the second letters are the same, look at the third letters, and so on. If one word is shorter, and there are no more letters to compare, then the shorter word comes first in alphabetical order. For example, be comes before bed.",
    "solution":"Put the words in alphabetical order.\nSince import is between the guide words ill - industry, it would be found on that page.",
    "split":"val",
    "path":null
  },
  {
    "question":"What does the allusion in this text suggest?\nTyler seems to have the Midas touch. Without any special experience or training, he launched a thriving business and then established a well-respected charity.",
    "choices":[
      "Tyler is successful at all that he does.",
      "Tyler has a hands-on approach to his work."
    ],
    "answer":0,
    "hint":null,
    "image":null,
    "task":"closed-choice",
    "grade":"grade8",
    "subject":"language science",
    "topic":"figurative-language",
    "category":"Literary devices",
    "skill":"Interpret figures of speech",
    "lecture":"Figures of speech are words or phrases that use language in a nonliteral or unusual way. They can make writing more expressive. An allusion is a brief reference to something or someone well known, often from history or literature. \"I'd better get home before I turn into a pumpkin!\" Lila remarked.",
    "solution":"The text uses an allusion, a brief reference to someone or something well known.\nThe allusion the Midas touch suggests that Tyler is successful at all that he does. In Greek mythology, King Midas has the power to turn anything he touches into gold, easily creating value from nothing.",
    "split":"val",
    "path":null
  },
  {
    "question":"Which is a complex sentence?",
    "choices":[
      "According to many scholars, the 1798 publication of Lyrical Ballads by Samuel Taylor Coleridge and William Wordsworth began the romantic period in English literature.",
      "Although presidential elections take place in early November, a president's term does not begin until the end of January."
    ],
    "answer":1,
    "hint":null,
    "image":null,
    "task":"closed-choice",
    "grade":"grade6",
    "subject":"language science",
    "topic":"grammar",
    "category":"Sentences, fragments, and run-ons",
    "skill":"Is the sentence simple, compound, or complex?",
    "lecture":"A clause is a group of words that contains both a subject and a predicate. An independent clause is a complete thought. It can stand alone as a sentence. A dependent clause is not a complete thought. It cannot stand alone as a sentence. the oranges on our tree are ripe The clause can stand alone. It is independent. after we pick up Kevin from work The clause cannot stand alone. It is dependent. A simple sentence is made up of a single independent clause. Ben and I spent all day relaxing by the pool. Some simple sentences have introductory phrases, but the introductory phrase is part of the predicate. In the winter, Ben usually wears his heavy coat. Ben usually wears his heavy coat in the winter. A compound sentence is made up of two independent clauses joined by a coordinating conjunction such as and, but, or, or so. We saw a flash of lightning, and seconds later we heard the rumble of thunder. A complex sentence is made up of an independent clause and a dependent clause. The dependent clause usually begins with a subordinating conjunction such as after, although, as, because, before, if, since, unless, until, when, or while. If she ever gets the chance, Terri would love to visit the Egyptian pyramids.",
    "solution":"The first sentence is the complex sentence. It is made up of an independent clause and a dependent clause. The dependent clause begins with the subordinating conjunction although.\nAlthough presidential elections take place in early November, a president's term does not begin until the end of January.",
    "split":"val",
    "path":null
  },
  {
    "question":"Is the following statement about our solar system true or false?\nThe volume of Mars is more than three times as large as Mercury's.",
    "choices":[
      "false",
      "true"
    ],
    "answer":0,
    "hint":"Use the data to answer the question below.",
    "image":"image.png",
    "task":"true-or-false",
    "grade":"grade6",
    "subject":"natural science",
    "topic":"earth-science",
    "category":"Astronomy",
    "skill":"Analyze data to compare properties of planets",
    "lecture":"A planet's volume tells you the size of the planet. The primary composition of a planet is what the planet is made mainly of. In our solar system, planets are made mainly of rock, gas, or ice.",
    "solution":"To determine if this statement is true, calculate the value of three times the volume of Mercury.\nThen compare the result to the volume of Mars. The volume of Mars is 160 billion km^3, which is less than 180 billion km^3. So, the volume of Mars is less than three times as large as Mercury's.",
    "split":"val",
    "path":"https:\/\/scienceqa-webdemo.s3.us-west-1.amazonaws.com\/extra\/206\/image.png"
  },
  {
    "question":"Which word does not rhyme?",
    "choices":[
      "slide",
      "ride",
      "made"
    ],
    "answer":2,
    "hint":null,
    "image":null,
    "task":"closed-choice",
    "grade":"grade2",
    "subject":"language science",
    "topic":"phonological-awareness",
    "category":"Rhyming",
    "skill":"Which word does not rhyme?",
    "lecture":"Rhyming words are words that end with the same sound. The words tip and slip rhyme. They both end with the same sound. The words meet and treat also rhyme. They both end with the same sound, even though the sound has two different spellings. The words tip and meet don't rhyme. They end with different sounds.",
    "solution":"The words slide and ride rhyme. They both end with the ide sound.\nThe word made does not rhyme. It ends with a different sound.",
    "split":"val",
    "path":null
  },
  {
    "question":"Which greeting is correct for a letter?",
    "choices":[
      "Dear Grandpa Tim,",
      "Dear grandpa Tim,"
    ],
    "answer":0,
    "hint":null,
    "image":null,
    "task":"closed-choice",
    "grade":"grade3",
    "subject":"language science",
    "topic":"punctuation",
    "category":"Formatting",
    "skill":"Greetings and closings of letters",
    "lecture":"A letter starts with a greeting and ends with a closing. For each one, capitalize the first word and end with a comma. You should also capitalize proper nouns, such as Aunt Sue. Dear Aunt Sue, I'm glad you could come to my party, and thank you for the birthday gift. I could not have asked for a better one! Every time I see it, I think of you. With love, Rory",
    "solution":"The second greeting is correct:\nIts first word is capitalized, and it ends with a comma. Grandpa Tim is capitalized because it is a proper noun.",
    "split":"val",
    "path":null
  },
  {
    "question":"What information supports the conclusion that Alec acquired this trait?",
    "choices":[
      "Alec knits sweaters using cotton, wool, and other types of yarn.",
      "Alec learned how to knit in an after school program."
    ],
    "answer":1,
    "hint":"Read the description of a trait.\nAlec knows how to knit sweaters.",
    "image":null,
    "task":"closed-choice",
    "grade":"grade3",
    "subject":"natural science",
    "topic":"biology",
    "category":"Heredity",
    "skill":"Inherited and acquired traits: use evidence to support a statement",
    "lecture":"Organisms, including people, have both inherited and acquired traits. Inherited and acquired traits are gained in different ways. Inherited traits are passed down through families. Children gain these traits from their parents. Inherited traits do not need to be learned. Acquired traits are gained during a person's life. Some acquired traits, such as riding a bicycle, are gained by learning. Other acquired traits, such as scars, are caused by the environment.",
    "solution":null,
    "split":"val",
    "path":null
  },
  {
    "question":"What does the verbal irony in this text suggest?\n\"It was my good luck to have to study for a test while all my friends went to the water park,\" Noah remarked.",
    "choices":[
      "Noah wanted time to catch up on his responsibilities.",
      "Noah was upset about staying home."
    ],
    "answer":1,
    "hint":null,
    "image":null,
    "task":"closed-choice",
    "grade":"grade10",
    "subject":"language science",
    "topic":"figurative-language",
    "category":"Literary devices",
    "skill":"Interpret figures of speech",
    "lecture":"Figures of speech are words or phrases that use language in a nonliteral or unusual way. They can make writing more expressive. Verbal irony involves saying one thing but implying something very different. People often use verbal irony when they are being sarcastic. Olivia seems thrilled that her car keeps breaking down. Each breakdown is as enjoyable as a punch to the face.",
    "solution":"The text uses verbal irony, which involves saying one thing but implying something very different.\nGood luck ironically suggests that Noah was upset about staying home. Noah was actually unlucky because he couldn't join his friends at the water park.",
    "split":"val",
    "path":null
  },
  {
    "question":"What do these two changes have in common?\ncooking a pancake\nrust forming on a bicycle frame",
    "choices":[
      "Both are caused by heating.",
      "Both are caused by cooling.",
      "Both are only physical changes.",
      "Both are chemical changes."
    ],
    "answer":3,
    "hint":null,
    "image":null,
    "task":"closed-choice",
    "grade":"grade4",
    "subject":"natural science",
    "topic":"chemistry",
    "category":"Physical and chemical change",
    "skill":"Compare physical and chemical changes",
    "lecture":"Chemical changes and physical changes are two common ways matter can change. In a chemical change, the type of matter changes. The types of matter before and after a chemical change are always different. Some chemical changes are caused by heating or cooling. For example, burning a piece of paper is a chemical change caused by heating. When paper gets hot enough, it re\u00adacts with oxygen in the air and burns. The paper and oxygen change into ash and smoke. In a physical change, the type of matter stays the same. The types of matter before and after a physical change are always the same. A change of state is a type of physical change. Changes of state can be caused by heating or cooling. For example, ice melting is a physical change that can be caused by heating. Ice and liquid water are made of the same type of matter: water. The law of conservation of mass says that all physical and chemical changes conserve mass. Conserve means to keep the same. So, the total mass before a physical or chemical change is equal to the total mass after the change.",
    "solution":"Step 1: Think about each change.\nCooking a pancake is a chemical change. Pancakes are made from pancake batter. A cooked pancake is a different type of matter than pancake batter. Pancake batter is wet and slippery. Cooked pancakes are fluffy and can be good to eat!\nRust forming on a bicycle frame is a chemical change. Oxygen in the air reacts with iron in the bicycle frame. The outside of the frame turns into a different type of matter called rust. Rust is reddish-brown and falls apart easily.\nStep 2: Look at each answer choice.\nBoth are only physical changes.\nBoth changes are chemical changes. They are not physical changes.\nBoth are chemical changes.\nBoth changes are chemical changes. The type of matter before and after each change is different.\nBoth are caused by heating.\nCooking is caused by heating. But rust forming on a bicycle frame is not.\nBoth are caused by cooling.\nNeither change is caused by cooling.",
    "split":"val",
    "path":null
  },
  {
    "question":"Select the one animal that has all of the bird traits listed above.",
    "choices":[
      "Burmese pythons hatch from eggs with shells. They can grow to over 12 feet long! Their scaly, waterproof skin is brown and black.",
      "Peregrine falcons are the fastest animals in the world! They use their wings to fly quickly and hunt prey. Peregrine falcons also have a beak and feathers. They hatch from eggs with speckled or spotted shells."
    ],
    "answer":1,
    "hint":"Birds are a group of animals with similar traits. The following traits can be used to identify birds:\nThey have feathers.\nThey have wings.\nThey have a beak.\nThey make eggs with shells. Observe the animals and read the descriptions.",
    "image":null,
    "task":"closed-choice",
    "grade":"grade4",
    "subject":"natural science",
    "topic":"biology",
    "category":"Classification",
    "skill":"Use evidence to classify mammals, birds, fish, reptiles, and amphibians",
    "lecture":"Scientists sort animals with similar traits into groups. This is called classification. Classification helps scientists learn about how animals live. How do scientists classify animals? First, they make observations about an animal. Scientists observe the animal's traits, including its body parts and behavior. Then, scientists compare the animal's traits to other animals' traits. Scientists classify animals with similar traits into a group.",
    "solution":"To decide if an animal is part of a group, look at the traits of the group.\nBirds have the following traits:\nThey have feathers.\nThey have wings.\nThey have a beak.\nThey make eggs with shells.\nCompare each animal's traits to the group's traits. Select the animal with traits similar to the group's traits.\nA Burmese python has the following traits:\nIt has scaly, waterproof skin.\nIt makes eggs with shells.\nA Burmese python does not have all of the traits of a bird. A Burmese python is a reptile.\nA peregrine falcon has the following traits:\nIt has feathers.\nIt has wings.\nIt has a beak.\nIt makes eggs with shells.\nA peregrine falcon has the traits of a bird. A peregrine falcon is a bird.",
    "split":"val",
    "path":null
  },
  {
    "question":"Does this passage describe the weather or the climate?\nIt got down to 3\u00b0C in Athens, Greece, last night!",
    "choices":[
      "weather",
      "climate"
    ],
    "answer":0,
    "hint":"Hint: Weather is what the atmosphere is like at a certain place and time. Climate is the pattern of weather in a certain place.",
    "image":null,
    "task":"closed-choice",
    "grade":"grade4",
    "subject":"natural science",
    "topic":"earth-science",
    "category":"Weather and climate",
    "skill":"What's the difference between weather and climate?",
    "lecture":"The atmosphere is the layer of air that surrounds Earth. Both weather and climate tell you about the atmosphere. Weather is what the atmosphere is like at a certain place and time. Weather can change quickly. For example, the temperature outside your house might get higher throughout the day. Climate is the pattern of weather in a certain place. For example, summer temperatures in New York are usually higher than winter temperatures.",
    "solution":"Read the text carefully.\nIt got down to 3\u00b0C in Athens, Greece, last night!\nThis passage tells you about the temperature in Athens last night. It describes the atmosphere at a certain place and time. So, this passage describes the weather.",
    "split":"val",
    "path":null
  },
  {
    "question":"Select the bird below.",
    "choices":[
      "gray tree frog",
      "pelican"
    ],
    "answer":1,
    "hint":"Birds have feathers, two wings, and a beak. A woodpecker is an example of a bird.",
    "image":"image.png",
    "task":"closed-choice",
    "grade":"grade2",
    "subject":"natural science",
    "topic":"biology",
    "category":"Classification",
    "skill":"Identify mammals, birds, fish, reptiles, and amphibians",
    "lecture":"Birds, mammals, fish, reptiles, and amphibians are groups of animals. The animals in each group have traits in common. Scientists sort animals into groups based on traits they have in common. This process is called classification.",
    "solution":"A pelican is a bird. It has feathers, two wings, and a beak.\nA gray tree frog is an amphibian. It has moist skin and begins its life in water.",
    "split":"val",
    "path":"https:\/\/scienceqa-webdemo.s3.us-west-1.amazonaws.com\/extra\/249\/image.png"
  },
  {
    "question":"Which organizational structure does this text primarily use?",
    "choices":[
      "compare-contrast",
      "problem-solution"
    ],
    "answer":1,
    "hint":"Read the text.\nIn the 1970s, architect I. M. Pei took on the difficult assignment of renovating and updating the beautiful Louvre Palace in Paris without overpowering the original building. The art museum in the centuries-old Louvre displayed Leonardo DaVinci's Mona Lisa and other famous works, but the building's layout was so confusing that tourists couldn't find the entrances. It also needed more restrooms and a bigger cafeteria. Pei designed a large central underground entrance and visitor center. He then added a glass pyramid above the entryway. Although Pei's design faced initial criticism, today the pyramid is considered a brilliant success\u2014a landmark that complements the old palace without interfering with it.",
    "image":null,
    "task":"closed-choice",
    "grade":"grade8",
    "subject":"language science",
    "topic":"writing-strategies",
    "category":"Text structure",
    "skill":"Identify text structures",
    "lecture":"Authors use different text structures to organize their ideas in writing. Learning to identify these structures will help you to understand the relationships between ideas in informational texts. You can also use these structures to organize your own writing. A cause-effect structure presents the causes and the effects of a particular event, trend, or situation. This structure often uses words and phrases such as because, since, as a result, due to, or consequently. A compare-contrast structure presents similarities (comparisons) and differences (contrasts) between two or more things. This structure often uses words and phrases such as like, similarly, or in the same way (for comparing) or on the other hand, in contrast, or unlike (for contrasting). A problem-solution structure presents a problem and suggests one or more possible solutions. This structure often uses words such as issue, question, puzzle, propose, and answer. A sequential structure describes a series of events that happens in a certain order. This structure often uses specific dates and times or words such as first, next, during, finally, and while.",
    "solution":"The text uses a problem-solution structure to show how architect I.M. Pei modernized the Louvre with an entrance that complemented the existing building. In the text, certain words and phrases help to organize ideas in a problem-solution structure. Notice the phrases difficult assignment and brilliant success.",
    "split":"val",
    "path":null
  },
  {
    "question":"Which logical fallacy is used in the text?\nDon't ever get a ride from Mariana. Her brother has been driving for only six months, and he's already gotten three speeding tickets.",
    "choices":[
      "guilt by association: a negative association intended to discredit someone or something",
      "circular reasoning: an argument that supports a claim with the claim itself"
    ],
    "answer":0,
    "hint":null,
    "image":null,
    "task":"closed-choice",
    "grade":"grade7",
    "subject":"language science",
    "topic":"writing-strategies",
    "category":"Developing and supporting arguments",
    "skill":"Classify logical fallacies",
    "lecture":"A strong argument uses valid reasoning and logic in support of a claim. When an argument or claim introduces irrelevant information or misrepresents the issues at hand, it may be committing a logical fallacy. Logical fallacies can hurt a writer's credibility and can lead readers to draw false conclusions. A logical fallacy may present irrelevant information: <br\/><br\/> Fallacy | Description<br\/> ad hominem | a personal attack meant to discredit one's opponent<br\/> appeal to nature | an argument that assumes the natural choice is always the best choice<br\/> bandwagon fallacy | an argument that assumes the popular choice is always the best choice<br\/> circular reasoning | an argument that supports a claim with the claim itself<br\/> guilt by association | an unfair negative association with another person or group that is intended to discredit someone or something<br\/> red herring | the use of a completely unrelated topic in support of a claim<br\/> <br\/> A logical fallacy may misrepresent the issues at hand: <br\/><br\/> Fallacy | Description<br\/> false causation | the assumption that because two things happened together, one caused the other<br\/> false dichotomy | an argument that presents only two choices when more options exist<br\/> hasty generalization | a very broad claim based on very little evidence<br\/> straw man | a misrepresentation of an opponent's position that makes it easier to argue against<br\/>",
    "solution":"The text argues that Mariana must be a reckless driver, because her brother is a reckless driver. However, even though Mariana's brother is reckless, that doesn't necessarily mean that Mariana is, too. This illustrates a type of logical fallacy known as guilt by association.",
    "split":"val",
    "path":null
  },
  {
    "question":"Which bird's beak is also adapted to crack large, hard nuts?",
    "choices":[
      "blue rock pigeon",
      "Alexandrine parakeet"
    ],
    "answer":1,
    "hint":"Scarlet macaws live in the forests of Central and South America. They eat large seeds and nuts. The shape of the 's beak is adapted to crack open large, hard nuts.\nFigure: scarlet macaw.",
    "image":"image.png",
    "task":"closed-choice",
    "grade":"grade4",
    "subject":"natural science",
    "topic":"biology",
    "category":"Adaptations",
    "skill":"Animal adaptations: beaks, mouths, and necks",
    "lecture":"An adaptation is an inherited trait that helps an organism survive or reproduce. Adaptations can include both body parts and behaviors. The shape of a bird's beak is one example of an adaptation. Birds' beaks can be adapted in different ways. For example, a sharp hooked beak might help a bird tear through meat easily. A short, thick beak might help a bird break through a seed's hard shell. Birds that eat similar food often have similar beaks.",
    "solution":"Look at the picture of the scarlet macaw.\nThe scarlet macaw has a thick hooked beak. Its beak is adapted to crack large, hard nuts. The scarlet macaw uses its thick beak to crack the shell of a nut by squeezing it. The hooked shape of the beak can help the bird hold the nut in place while cracking it.\nNow look at each bird. Figure out which bird has a similar adaptation.\nThe Alexandrine parakeet has a thick hooked beak. Its beak is adapted to crack large, hard nuts.\nThe blue rock pigeon has a short, thin beak. Its beak is not adapted to crack large, hard nuts.",
    "split":"val",
    "path":"https:\/\/scienceqa-webdemo.s3.us-west-1.amazonaws.com\/extra\/257\/image.png"
  },
  {
    "question":"Complete the sentence.\n is what happens when pollen lands on a female cone.",
    "choices":[
      "Fertilization",
      "Pollination",
      "Photosynthesis"
    ],
    "answer":1,
    "hint":"Male cones make pollen. Wind can blow pollen from a male cone to a female cone.",
    "image":"image.png",
    "task":"closed-choice",
    "grade":"grade4",
    "subject":"natural science",
    "topic":"biology",
    "category":"Plants",
    "skill":"Describe and construct conifer life cycles",
    "lecture":"Conifers are plants that grow cones. Conifers use their cones to reproduce, or make new plants like themselves. How do conifers use their cones to reproduce? Conifers can grow male and female cones. Male cones make pollen, and female cones make eggs. Pollination is what happens when wind blows pollen from male cones onto female cones. After pollination, sperm from the pollen can combine with eggs. This is called fertilization. The fertilized eggs grow into seeds. The seeds can fall out of the cones and land on the ground. When a seed lands on the ground, it can germinate, or start to grow into a new plant.",
    "solution":"When pollen lands on a female cone, it is called pollination. This photograph shows wind blowing pollen from the male cones on a Japanese cedar tree.\nPhotosynthesis happens when plants use water, carbon dioxide, and energy from sunlight to make sugar.",
    "split":"val",
    "path":"https:\/\/scienceqa-webdemo.s3.us-west-1.amazonaws.com\/extra\/258\/image.png"
  },
  {
    "question":"Which property do these three objects have in common?",
    "choices":[
      "stretchy",
      "transparent",
      "rough"
    ],
    "answer":0,
    "hint":"Select the best answer.",
    "image":"image.png",
    "task":"closed-choice",
    "grade":"grade4",
    "subject":"natural science",
    "topic":"physics",
    "category":"Materials",
    "skill":"Compare properties of objects",
    "lecture":"An object has different properties. A property of an object can tell you how it looks, feels, tastes, or smells. Properties can also tell you how an object will behave when something happens to it. Different objects can have properties in common. You can use these properties to put objects into groups. Grouping objects by their properties is called classification.",
    "solution":"Look at each object.\nFor each object, decide if it has that property.\nYou can see clearly through a transparent object. None of the objects are transparent.\nA stretchy object gets longer when you pull on it. All three objects are stretchy.\nA rough object feels scratchy when you touch it. The bubble gum and the rubber band are not rough.\nThe property that all three objects have in common is stretchy.",
    "split":"val",
    "path":"https:\/\/scienceqa-webdemo.s3.us-west-1.amazonaws.com\/extra\/262\/image.png"
  },
  {
    "question":"Which term matches the picture?",
    "choices":[
      "chemical change",
      "physical change"
    ],
    "answer":1,
    "hint":"Read the text.\nWhen a substance goes through a physical change, its form or shape changes, but its chemical composition does not. For example, when water freezes and becomes a solid, its form changes, but it is still made up of the same molecules. In a chemical change, by contrast, one or more of the molecules in a substance changes. For example, when vinegar is mixed with baking soda, water and carbon dioxide molecules form.",
    "image":"image.png",
    "task":"closed-choice",
    "grade":"grade6",
    "subject":"language science",
    "topic":"vocabulary",
    "category":"Context clues",
    "skill":"Determine the meaning of domain-specific words with pictures",
    "lecture":null,
    "solution":"When water melts, it goes through a physical change. The substance changes from a solid to a liquid.",
    "split":"val",
    "path":"https:\/\/scienceqa-webdemo.s3.us-west-1.amazonaws.com\/extra\/263\/image.png"
  },
  {
    "question":"Is Chelonoidis nigra made up of many cells?",
    "choices":[
      "no",
      "yes"
    ],
    "answer":1,
    "hint":"This organism is Chelonoidis nigra. It is a member of the animal kingdom.\nChelonoidis nigra is commonly called a Gal\u00e1pagos giant tortoise. These large tortoises live on the Gal\u00e1pagos Islands. When Spanish sailors arrived at these islands in the 1530s, about 200,000 Gal\u00e1pagos giant tortoises lived on the islands. The Spanish sailors named the islands after a Spanish word for tortoise, gal\u00e1pago.",
    "image":"image.png",
    "task":"yes-or-no",
    "grade":"grade4",
    "subject":"natural science",
    "topic":"biology",
    "category":"Classification",
    "skill":"Describe, classify, and compare kingdoms",
    "lecture":"In the past, scientists classified living organisms into two groups: plants and animals. Over the past 300 years, scientists have discovered many more types of organisms. Today, many scientists classify organisms into six broad groups, called kingdoms. Organisms in each kingdom have specific traits. The table below shows some traits used to describe each kingdom. <br\/><br\/>  | Bacteria | Archaea | Protists | Fungi | Animals | Plants<br\/> How many cells do they have? | one | one | one or many | one or many | many | many<br\/> Do their cells have a nucleus? | no | no | yes | yes | yes | yes<br\/> Can their cells make food? | some species can | some species can | some species can | no | no | yes<br\/>",
    "solution":"Chelonoidis nigra is an animal. Animals are made up of many cells.",
    "split":"val",
    "path":"https:\/\/scienceqa-webdemo.s3.us-west-1.amazonaws.com\/extra\/265\/image.png"
  },
  {
    "question":"Which of these continents does the equator intersect?",
    "choices":[
      "North America",
      "Australia",
      "Africa"
    ],
    "answer":2,
    "hint":null,
    "image":"image.png",
    "task":"closed-choice",
    "grade":"grade4",
    "subject":"social science",
    "topic":"geography",
    "category":"Maps",
    "skill":"Use lines of latitude and longitude",
    "lecture":"Lines of latitude and lines of longitude are imaginary lines drawn on some globes and maps. They can help you find places on globes and maps. Lines of latitude show how far north or south a place is. We use units called degrees to describe how far a place is from the equator. The equator is the line located at 0\u00b0 latitude. We start counting degrees from there. Lines north of the equator are labeled N for north. Lines south of the equator are labeled S for south. Lines of latitude are also called parallels because each line is parallel to the equator. Lines of longitude are also called meridians. They show how far east or west a place is. We use degrees to help describe how far a place is from the prime meridian. The prime meridian is the line located at 0\u00b0 longitude. Lines west of the prime meridian are labeled W. Lines east of the prime meridian are labeled E. Meridians meet at the north and south poles. The equator goes all the way around the earth, but the prime meridian is different. It only goes from the North Pole to the South Pole on one side of the earth. On the opposite side of the globe is another special meridian. It is labeled both 180\u00b0E and 180\u00b0W. Together, lines of latitude and lines of longitude form a grid. You can use this grid to find the exact location of a place.",
    "solution":"The equator is the line at 0\u00b0 latitude. It intersects Africa. It does not intersect North America or Australia.",
    "split":"val",
    "path":"https:\/\/scienceqa-webdemo.s3.us-west-1.amazonaws.com\/extra\/273\/image.png"
  },
  {
    "question":"Which greeting is correct for a letter?",
    "choices":[
      "Dear dr. hoffman,",
      "Dear Dr. Hoffman,"
    ],
    "answer":1,
    "hint":null,
    "image":null,
    "task":"closed-choice",
    "grade":"grade3",
    "subject":"language science",
    "topic":"punctuation",
    "category":"Formatting",
    "skill":"Greetings and closings of letters",
    "lecture":"A letter starts with a greeting and ends with a closing. For each one, capitalize the first word and end with a comma. You should also capitalize proper nouns, such as Aunt Sue. Dear Aunt Sue, I'm glad you could come to my party, and thank you for the birthday gift. I could not have asked for a better one! Every time I see it, I think of you. With love, Rory",
    "solution":"The second greeting is correct:\nIts first word is capitalized, and it ends with a comma. Dr. Hoffman is capitalized because it is a proper noun.",
    "split":"val",
    "path":null
  },
  {
    "question":"What is the name of the colony shown?",
    "choices":[
      "New Hampshire",
      "Iowa",
      "Massachusetts",
      "Vermont"
    ],
    "answer":0,
    "hint":null,
    "image":"image.png",
    "task":"closed-choice",
    "grade":"grade8",
    "subject":"social science",
    "topic":"us-history",
    "category":"Colonial America",
    "skill":"Identify the Thirteen Colonies",
    "lecture":null,
    "solution":"The colony is New Hampshire.\nDuring the colonial era, New Hampshire and New York both claimed the territory that would later become the state of Vermont. Vermont was never its own colony.",
    "split":"val",
    "path":"https:\/\/scienceqa-webdemo.s3.us-west-1.amazonaws.com\/extra\/278\/image.png"
  },
  {
    "question":"Based on this information, what is Chanel's phenotype for the fur length trait?",
    "choices":[
      "short fur",
      "long fur"
    ],
    "answer":0,
    "hint":"In a group of cats, some individuals have short fur and others have long fur. In this group, the gene for the fur length trait has two alleles. The allele for short fur (F) is dominant over the allele for long fur (f).\nChanel is a cat from this group. Chanel has the homozygous genotype FF for the fur length gene.",
    "image":null,
    "task":"closed-choice",
    "grade":"grade6",
    "subject":"natural science",
    "topic":"biology",
    "category":"Genes to traits",
    "skill":"Genetics vocabulary: dominant and recessive",
    "lecture":"All organisms have pieces of hereditary material called genes, which are passed from parents to offspring. Genes contain instructions for building the parts of an organism. An organism's genes affect its observable traits, including its appearance, its behavior, and which diseases it may have. Genes may have different alleles, or forms, that can cause different versions of a trait. For example, flower color is a trait in pea plants. The gene for this trait has two possible alleles. Each allele is represented by an uppercase or lowercase letter. The allele F is for purple flowers, and the allele f is for white flowers. Each pea plant has two alleles for the flower color gene\u2014one allele inherited from each parent. An organism's genotype for a gene is its combination of alleles for that gene. So, a pea plant may have a genotype of FF, Ff, or ff for the flower color gene. An organism's phenotype for a trait is its observable version of that trait, which depends on the organism's combination of alleles. A pea plant may have a phenotype of purple flowers or white flowers for the flower color trait. Some traits, like flower color in pea plants, are controlled by a single gene. Most plants and animals have a genotype made up of two alleles for these traits. These two alleles determine whether an organism is homozygous or heterozygous for the gene. An organism with two identical alleles for a gene is homozygous for that gene. A pea plant with the genotype FF or ff is homozygous for the flower color gene. An organism with two different alleles for a gene is heterozygous for that gene. A pea plant with the genotype Ff is heterozygous for the flower color gene. The types of alleles in an organism's genotype determine the organism's phenotype. Some alleles have types called dominant and recessive. These two types can cause different versions of a trait to appear as the organism's phenotype. A dominant allele causes its version of the trait to appear even when the organism also has a recessive allele for the gene. In pea plants, the F allele, which causes purple flowers, is dominant over the f allele. A pea plant with at least one F allele will have the F allele's version of the flower color trait. So, a plant with the genotype FF or Ff will have purple flowers. A recessive allele causes its version of the trait to appear only when the organism does not have any dominant alleles for the gene. In pea plants, the f allele, which causes white flowers, is recessive to the F allele. A pea plant with only f alleles will have the f allele's version of the flower color trait. So, a plant with the genotype ff will have white flowers.",
    "solution":"Chanel's genotype for the fur length gene is FF. Chanel's genotype of FF has only F allelles. The F allele is for short fur. So, Chanel's phenotype for the fur length trait must be short fur.\nTo check this answer, consider whether Chanel's alleles are dominant or recessive. The allele for short fur (F) is dominant over the allele for long fur (f). This means F is a dominant allele, and f is a recessive allele.\nChanel's genotype of FF has two dominant alleles. An organism with at least one dominant allele for a gene will have the dominant allele's version of the trait. So, Chanel's phenotype for the fur length trait must be short fur.",
    "split":"val",
    "path":null
  },
  {
    "question":"What information supports the conclusion that Lee acquired this trait?",
    "choices":[
      "Lee is most interested in human biology.",
      "Lee learned biology by reading, observing, and experimenting."
    ],
    "answer":1,
    "hint":"Read the description of a trait.\nLee knows a lot about biology.",
    "image":null,
    "task":"closed-choice",
    "grade":"grade4",
    "subject":"natural science",
    "topic":"biology",
    "category":"Traits and heredity",
    "skill":"Inherited and acquired traits: use evidence to support a statement",
    "lecture":"Organisms, including people, have both inherited and acquired traits. Inherited and acquired traits are gained in different ways. Inherited traits are passed down through families. Children gain these traits from their parents. Inherited traits do not need to be learned. Acquired traits are gained during a person's life. Some acquired traits, such as riding a bicycle, are gained by learning. Other acquired traits, such as scars, are caused by the environment.",
    "solution":null,
    "split":"val",
    "path":null
  },
  {
    "question":"Which organ coordinates muscle movement?",
    "choices":[
      "lungs",
      "heart",
      "skeleton",
      "brain"
    ],
    "answer":3,
    "hint":null,
    "image":null,
    "task":"closed-choice",
    "grade":"grade5",
    "subject":"natural science",
    "topic":"biology",
    "category":"Animals",
    "skill":"Human organs and their functions",
    "lecture":null,
    "solution":null,
    "split":"val",
    "path":null
  },
  {
    "question":"Select the vertebrate.",
    "choices":[
      "black widow spider",
      "bull ant",
      "Yangtze alligator",
      "atlas moth"
    ],
    "answer":2,
    "hint":"Hint: Mammals, birds, fish, reptiles, and amphibians are vertebrates.",
    "image":null,
    "task":"closed-choice",
    "grade":"grade4",
    "subject":"natural science",
    "topic":"biology",
    "category":"Classification",
    "skill":"Identify vertebrates and invertebrates",
    "lecture":"Vertebrates and invertebrates are both groups of animals. A vertebrate has a backbone. The backbone is made of many bones in an animal's back. A vertebrate's backbone helps connect the different parts of its body. In the drawings below, each vertebrate's backbone is colored orange. An invertebrate does not have a backbone. In fact, invertebrates do not have any bones! Some invertebrates have an outer cover on their body called an exoskeleton. Other invertebrates have a soft body.",
    "solution":"A bull ant is an insect. Like other insects, a bull ant is an invertebrate. It does not have a backbone. It has an exoskeleton.\nA Yangtze alligator is a reptile. Like other reptiles, a Yangtze alligator is a vertebrate. It has a backbone.\nAn atlas moth is an insect. Like other insects, an atlas moth is an invertebrate. It does not have a backbone. It has an exoskeleton.\nLike other spiders, a black widow spider is an invertebrate. It does not have a backbone. It has an exoskeleton.",
    "split":"val",
    "path":null
  },
  {
    "question":"Which object has the least thermal energy?",
    "choices":[
      "a bowl of oatmeal at a temperature of 28\u00b0C",
      "a bowl of oatmeal at a temperature of 22\u00b0C",
      "a bowl of oatmeal at a temperature of 41\u00b0C"
    ],
    "answer":1,
    "hint":"The objects are identical except for their temperatures.",
    "image":null,
    "task":"closed-choice",
    "grade":"grade4",
    "subject":"natural science",
    "topic":"physics",
    "category":"Heat and thermal energy",
    "skill":"How is temperature related to thermal energy?",
    "lecture":"All solids, liquids, and gases are made of matter. Matter is made up of tiny particles that are always moving. The energy from the motion of these particles is called thermal energy. Temperature measures how hot or cold matter is. If the particles in matter slow down, the temperature goes down. The matter now has both less thermal energy and a lower temperature.",
    "solution":"All three bowls of oatmeal have the same mass but different temperatures. Since the 22\u00b0C bowl of oatmeal is the coldest, it has the least thermal energy.",
    "split":"val",
    "path":null
  },
  {
    "question":"Compare the average kinetic energies of the particles in each sample. Which sample has the higher temperature?",
    "choices":[
      "sample A",
      "neither; the samples have the same temperature",
      "sample B"
    ],
    "answer":0,
    "hint":"The diagrams below show two pure samples of gas in identical closed, rigid containers. Each colored ball represents one gas particle. Both samples have the same number of particles.",
    "image":"image.png",
    "task":"closed-choice",
    "grade":"grade6",
    "subject":"natural science",
    "topic":"physics",
    "category":"Particle motion and energy",
    "skill":"Identify how particle motion affects temperature and pressure",
    "lecture":"The temperature of a substance depends on the average kinetic energy of the particles in the substance. The higher the average kinetic energy of the particles, the higher the temperature of the substance. The kinetic energy of a particle is determined by its mass and speed. For a pure substance, the greater the mass of each particle in the substance and the higher the average speed of the particles, the higher their average kinetic energy.",
    "solution":"Each particle in the two samples has the same mass, but the particles in sample A have a higher average speed than the particles in sample B. So, the particles in sample A have a higher average kinetic energy than the particles in sample B.\nBecause the particles in sample A have the higher average kinetic energy, sample A must have the higher temperature.",
    "split":"val",
    "path":"https:\/\/scienceqa-webdemo.s3.us-west-1.amazonaws.com\/extra\/309\/image.png"
  },
  {
    "question":"Does this passage describe the weather or the climate?",
    "choices":[
      "weather",
      "climate"
    ],
    "answer":1,
    "hint":"Figure: Oklahoma.\nLarge thunderstorms, called supercells, often bring large clouds. Oklahoma often experiences violent storms during the summer months.\nHint: Weather is what the atmosphere is like at a certain place and time. Climate is the pattern of weather in a certain place.",
    "image":"image.png",
    "task":"closed-choice",
    "grade":"grade6",
    "subject":"natural science",
    "topic":"earth-science",
    "category":"Weather and climate",
    "skill":"Weather and climate around the world",
    "lecture":"The atmosphere is the layer of air that surrounds Earth. Both weather and climate tell you about the atmosphere. Weather is what the atmosphere is like at a certain place and time. Weather can change quickly. For example, the temperature outside your house might get higher throughout the day. Climate is the pattern of weather in a certain place. For example, summer temperatures in New York are usually higher than winter temperatures.",
    "solution":"Read the passage carefully.\nLarge thunderstorms, called supercells, often bring large clouds. Oklahoma often experiences violent storms during the summer months.\nThe underlined part of the passage tells you about the usual pattern of cloud cover in Oklahoma. This passage does not describe what the weather is like on a particular day. So, this passage describes the climate.",
    "split":"val",
    "path":"https:\/\/scienceqa-webdemo.s3.us-west-1.amazonaws.com\/extra\/317\/image.png"
  },
  {
    "question":"Identify the question that Rob's experiment can best answer.",
    "choices":[
      "Do steel nails rust in fewer days when submerged in a large volume of liquid compared to a small volume?",
      "Do steel nails take fewer days to rust in water compared to vinegar?"
    ],
    "answer":1,
    "hint":"The passage below describes an experiment. Read the passage and then follow the instructions below.\n\nRob put one two-inch steel nail into each of six test tubes. He added water to three of the test tubes and vinegar to the other three. In each test tube, he completely covered the nail with the same volume of liquid. Rob checked the nails for rust at the same time every day. He recorded how many days it took each nail to become completely covered in rust. Then, he compared the number of days it took nails to rust in water to the number of days it took nails to rust in vinegar.\nFigure: a new steel nail on a pile of rusty nails.",
    "image":"image.png",
    "task":"closed-choice",
    "grade":"grade6",
    "subject":"natural science",
    "topic":"science-and-engineering-practices",
    "category":"Designing experiments",
    "skill":"Identify the experimental question",
    "lecture":"Experiments can be designed to answer specific questions. How can you identify the questions that a certain experiment can answer? In order to do this, you need to figure out what was tested and what was measured during the experiment. Imagine an experiment with two groups of daffodil plants. One group of plants was grown in sandy soil, and the other was grown in clay soil. Then, the height of each plant was measured. First, identify the part of the experiment that was tested. The part of an experiment that is tested usually involves the part of the experimental setup that is different or changed. In the experiment described above, each group of plants was grown in a different type of soil. So, the effect of growing plants in different soil types was tested. Then, identify the part of the experiment that was measured. The part of the experiment that is measured may include measurements and calculations. In the experiment described above, the heights of the plants in each group were measured. Experiments can answer questions about how the part of the experiment that is tested affects the part that is measured. So, the experiment described above can answer questions about how soil type affects plant height. Examples of questions that this experiment can answer include: Does soil type affect the height of daffodil plants? Do daffodil plants in sandy soil grow taller than daffodil plants in clay soil? Are daffodil plants grown in sandy soil shorter than daffodil plants grown in clay soil?",
    "solution":null,
    "split":"val",
    "path":"https:\/\/scienceqa-webdemo.s3.us-west-1.amazonaws.com\/extra\/323\/image.png"
  },
  {
    "question":"Based on the bubble map, what does the quotation \"Vanity, not love, has been my folly\" show?",
    "choices":[
      "Darcy is stubborn.",
      "Elizabeth is judgmental."
    ],
    "answer":1,
    "hint":"This bubble map shows traits of characters from Pride and Prejudice by Jane Austen. It also includes quotations from the characters that show these traits.",
    "image":"image.png",
    "task":"closed-choice",
    "grade":"grade6",
    "subject":"language science",
    "topic":"writing-strategies",
    "category":"Visual elements",
    "skill":"Read graphic organizers",
    "lecture":"A graphic organizer is a chart or picture that shows how ideas, facts, or topics are related to one another. When you read, look for graphic organizers included in the text. You can use these images to find key information. You can also create your own graphic organizers with information that you've read. Doing this can help you think about the ideas in the text and easily review them. When you write, you can use graphic organizers to organize your thoughts and plan your writing.",
    "solution":"A bubble map uses lines or arrows to connect things that are related. This bubble map shows traits of characters from Pride and Prejudice by Jane Austen. It also includes quotations from the characters that show these traits.\nFind the quotation \"Vanity, not love, has been my folly\" in the bubble map. It is directly connected to judgmental, which is directly connected to Elizabeth. So, the quotation shows that Elizabeth is judgmental.",
    "split":"val",
    "path":"https:\/\/scienceqa-webdemo.s3.us-west-1.amazonaws.com\/extra\/326\/image.png"
  },
  {
    "question":"Which of these oceans does the prime meridian intersect?",
    "choices":[
      "the Indian Ocean",
      "the Arctic Ocean",
      "the Pacific Ocean"
    ],
    "answer":1,
    "hint":null,
    "image":"image.png",
    "task":"closed-choice",
    "grade":"grade4",
    "subject":"social science",
    "topic":"geography",
    "category":"Maps",
    "skill":"Use lines of latitude and longitude",
    "lecture":"Lines of latitude and lines of longitude are imaginary lines drawn on some globes and maps. They can help you find places on globes and maps. Lines of latitude show how far north or south a place is. We use units called degrees to describe how far a place is from the equator. The equator is the line located at 0\u00b0 latitude. We start counting degrees from there. Lines north of the equator are labeled N for north. Lines south of the equator are labeled S for south. Lines of latitude are also called parallels because each line is parallel to the equator. Lines of longitude are also called meridians. They show how far east or west a place is. We use degrees to help describe how far a place is from the prime meridian. The prime meridian is the line located at 0\u00b0 longitude. Lines west of the prime meridian are labeled W. Lines east of the prime meridian are labeled E. Meridians meet at the north and south poles. The equator goes all the way around the earth, but the prime meridian is different. It only goes from the North Pole to the South Pole on one side of the earth. On the opposite side of the globe is another special meridian. It is labeled both 180\u00b0E and 180\u00b0W. Together, lines of latitude and lines of longitude form a grid. You can use this grid to find the exact location of a place.",
    "solution":"The prime meridian is the line at 0\u00b0 longitude. It intersects the Arctic Ocean. It does not intersect the Indian Ocean or the Pacific Ocean.",
    "split":"val",
    "path":"https:\/\/scienceqa-webdemo.s3.us-west-1.amazonaws.com\/extra\/340\/image.png"
  },
  {
    "question":"What is the mass of a can of soup?",
    "choices":[
      "12 ounces",
      "12 tons",
      "12 pounds"
    ],
    "answer":0,
    "hint":"Select the best estimate.",
    "image":null,
    "task":"closed-choice",
    "grade":"grade5",
    "subject":"natural science",
    "topic":"units-and-measurement",
    "category":"Units and measurement",
    "skill":"Choose customary units of mass",
    "lecture":"Measurements are written with both a number and a unit. The unit comes after the number. The unit shows what the number means. Mass is a measurement of how much matter something contains. There are many different units of mass. When you are using customary units, mass may be written with units of ounces, pounds, or tons. There are 16 ounces in 1 pound and 2,000 pounds in 1 ton. So, 1 ounce is less than 1 pound and much less than 1 ton. A slice of bread has a mass of about 1 ounce, while a can of beans has a mass of about 1 pound. A small car has a mass of about 1 ton.",
    "solution":"The best estimate for the mass of a can of soup is 12 ounces.\n12 pounds and 12 tons are both too heavy.",
    "split":"val",
    "path":null
  },
  {
    "question":"Which figure of speech is used in this text?\nThe grave's a fine and private place,\nBut none, I think, do there embrace.\n\u2014Andrew Marvell, \"To His Coy Mistress\"",
    "choices":[
      "understatement",
      "paradox"
    ],
    "answer":0,
    "hint":null,
    "image":null,
    "task":"closed-choice",
    "grade":"grade11",
    "subject":"language science",
    "topic":"figurative-language",
    "category":"Literary devices",
    "skill":"Classify the figure of speech: review",
    "lecture":"Figures of speech are words or phrases that use language in a nonliteral or unusual way. They can make writing more expressive. Anaphora is the repetition of the same word or words at the beginning of several phrases or clauses. We are united. We are powerful. We are winners. Antithesis involves contrasting opposing ideas within a parallel grammatical structure. I want to help, not to hurt. Apostrophe is a direct address to an absent person or a nonhuman entity. Oh, little bird, what makes you sing so beautifully? Assonance is the repetition of a vowel sound in a series of nearby words. Try to light the fire. Chiasmus is an expression in which the second half parallels the first but reverses the order of words. Never let a fool kiss you or a kiss fool you. A euphemism is a polite or indirect expression that is used to de-emphasize an unpleasant topic. The head of Human Resources would never refer to firing people, only to laying them off. Hyperbole is an obvious exaggeration that is not meant to be taken literally. I ate so much that I think I might explode! An oxymoron is a joining of two seemingly contradictory terms. Some reviewers are calling this book a new classic. A paradox is a statement that might at first appear to be contradictory, but that may in fact contain some truth. Always expect the unexpected. Understatement involves deliberately representing something as less serious or important than it really is. As you know, it can get a little cold in the Antarctic.",
    "solution":"The text uses understatement, which involves deliberately representing something as less serious or important than it really is.\nNone, I think, do there embrace is an understatement, since people who have died obviously can't do anything at all.",
    "split":"val",
    "path":null
  },
  {
    "question":"Which is the most flexible?",
    "choices":[
      "burlap sack",
      "wax crayons",
      "concrete steps"
    ],
    "answer":0,
    "hint":null,
    "image":null,
    "task":"closed-choice",
    "grade":"grade4",
    "subject":"natural science",
    "topic":"physics",
    "category":"Materials",
    "skill":"Compare properties of materials",
    "lecture":"Every object is made of one or more materials. A material is a type of matter. Wood, glass, metal, and plastic are common materials. A material has different properties. A material's properties tell you how it looks, feels, tastes, or smells. Some examples of properties are shiny, hard, fragile, and stretchy. For example, a shiny material reflects a lot of light. A fragile material breaks when you drop it.",
    "solution":"Flexible is a property. A flexible material can be bent without breaking easily.\nLook at each picture, one at a time. Imagine bending the material shown in each picture.\nOf the choices, the burlap sack is the most flexible. If you twist burlap fabric, it will not break.",
    "split":"val",
    "path":null
  },
  {
    "question":"What can Rebecca and Damon trade to each get what they want?",
    "choices":[
      "Damon can trade his almonds for Rebecca's tomatoes.",
      "Rebecca can trade her tomatoes for Damon's broccoli.",
      "Rebecca can trade her tomatoes for Damon's carrots.",
      "Damon can trade his broccoli for Rebecca's oranges."
    ],
    "answer":1,
    "hint":"Trade happens when people agree to exchange goods and services. People give up something to get something else. Sometimes people barter, or directly exchange one good or service for another.\nRebecca and Damon open their lunch boxes in the school cafeteria. Neither Rebecca nor Damon got everything that they wanted. The table below shows which items they each wanted:\n\nLook at the images of their lunches. Then answer the question below.\nRebecca's lunch Damon's lunch",
    "image":"image.png",
    "task":"closed-choice",
    "grade":"grade8",
    "subject":"social science",
    "topic":"economics",
    "category":"Basic economic principles",
    "skill":"Trade and specialization",
    "lecture":null,
    "solution":"Look at the table and images.\nRebecca wants broccoli. Damon wants tomatoes. They can trade tomatoes for broccoli to both get what they want. Trading other things would not help both people get more items they want.",
    "split":"val",
    "path":"https:\/\/scienceqa-webdemo.s3.us-west-1.amazonaws.com\/extra\/358\/image.png"
  },
  {
    "question":"Easter is an important holiday in which religion?",
    "choices":[
      "Hinduism",
      "Christianity",
      "Islam",
      "Judaism"
    ],
    "answer":1,
    "hint":null,
    "image":null,
    "task":"closed-choice",
    "grade":"grade2",
    "subject":"social science",
    "topic":"culture",
    "category":"Cultural celebrations",
    "skill":"Easter",
    "lecture":null,
    "solution":"Easter is an important holiday in Christianity. People who practice Christianity are called Christians.",
    "split":"val",
    "path":null
  },
  {
    "question":"What is the capital of North Carolina?",
    "choices":[
      "Raleigh",
      "Charlotte",
      "Cincinnati",
      "Nampa"
    ],
    "answer":0,
    "hint":null,
    "image":"image.png",
    "task":"closed-choice",
    "grade":"grade4",
    "subject":"social science",
    "topic":"geography",
    "category":"State capitals",
    "skill":"Identify state capitals of the Southeast",
    "lecture":null,
    "solution":"Raleigh is the capital of North Carolina.",
    "split":"val",
    "path":"https:\/\/scienceqa-webdemo.s3.us-west-1.amazonaws.com\/extra\/361\/image.png"
  },
  {
    "question":"What kind of sentence is this?\nWhy is your position on sales tax so different from your stance toward related issues?",
    "choices":[
      "interrogative",
      "imperative",
      "declarative"
    ],
    "answer":0,
    "hint":null,
    "image":null,
    "task":"closed-choice",
    "grade":"grade9",
    "subject":"language science",
    "topic":"punctuation",
    "category":"Sentences, fragments, and run-ons",
    "skill":"Is the sentence declarative, interrogative, imperative, or exclamatory?",
    "lecture":"There are four kinds of sentences. A declarative sentence is a statement and always ends with a period. The nurse told Mr. Abrams to roll up his sleeve so that she could check his blood pressure. An imperative sentence makes a request or a demand and usually ends with a period. If a demand shows strong feeling, it can end with an exclamation point. For this assignment, use references to support your claims. Don't drive so quickly in the construction zone! An interrogative sentence asks a question and always ends with a question mark. Given the recent critiques of her new strategic plan, do you think the CEO will reconsider the company's direction? An exclamatory sentence is a statement that shows surprise or strong feeling. An exclamation always ends with an exclamation point. I can't wait to travel through Europe this summer!",
    "solution":"The sentence asks a question and ends with a question mark. It is an interrogative sentence.",
    "split":"val",
    "path":null
  },
  {
    "question":"Which text uses the word can in its traditional sense?",
    "choices":[
      "As they observed the animals on the open grassland, the wildlife photographer said to Kevin, \"Did you know that cheetahs can run as fast as seventy-five miles per hour?\"",
      "As they observed the cheetahs on the open grassland, the wildlife photographer said to Kevin, \"You can borrow my camera if you want.\""
    ],
    "answer":0,
    "hint":null,
    "image":null,
    "task":"closed-choice",
    "grade":"grade9",
    "subject":"language science",
    "topic":"writing-strategies",
    "category":"Word usage and nuance",
    "skill":"Explore words with new or contested usages",
    "lecture":"Words change in meaning when speakers begin using them in new ways. For example, the word peruse once only meant to examine in detail, but it's now also commonly used to mean to look through in a casual manner. When a word changes in meaning, its correct usage is often debated. Although a newer sense of the word may be more commonly used, many people consider a word's traditional definition to be the correct usage. Being able to distinguish the different uses of a word can help you use it appropriately for different audiences. Britney perused her notes, carefully preparing for her exam. The traditional usage above is considered more standard. David perused the magazine, absentmindedly flipping through the pages. The nontraditional usage above is now commonly used, but traditional style guides generally advise against it.",
    "solution":"The first text uses can in its traditional sense: to have the ability to.\nAs they observed the animals on the open grassland, the wildlife photographer said to Kevin, \"Did you know that cheetahs can run as fast as seventy-five miles per hour?\"\nThe second text uses can in its nontraditional sense: to have permission to.\nAs they observed the cheetahs on the open grassland, the wildlife photographer said to Kevin, \"You can borrow my camera if you want.\"\nMost style guides recommend to use the traditional sense of the word can because it is considered more standard.",
    "split":"val",
    "path":null
  },
  {
    "question":"Which animal's body is better adapted for protection against a predator with sharp teeth?",
    "choices":[
      "queen conch",
      "collared dove"
    ],
    "answer":0,
    "hint":"Nautiluses live in the ocean. They have a hard outer shell.\nThe  is adapted to protect itself from predators with sharp teeth. It can pull the soft parts of its body into its shell when attacked.\nFigure: nautilus.",
    "image":"image.png",
    "task":"closed-choice",
    "grade":"grade5",
    "subject":"natural science",
    "topic":"biology",
    "category":"Adaptations",
    "skill":"Animal adaptations: skins and body coverings",
    "lecture":"An adaptation is an inherited trait that helps an organism survive or reproduce. Adaptations can include both body parts and behaviors. The color, texture, and covering of an animal's skin are examples of adaptations. Animals' skins can be adapted in different ways. For example, skin with thick fur might help an animal stay warm. Skin with sharp spines might help an animal defend itself against predators.",
    "solution":"Look at the picture of the nautilus.\nThe nautilus has a hard outer shell. Its body is adapted for protection against a predator with sharp teeth. The hard shell makes it difficult for predators to hurt or kill the nautilus.\nNow look at each animal. Figure out which animal has a similar adaptation.\nThe queen conch has a hard outer shell. Its body is adapted for protection against a predator with sharp teeth.\nThe collared dove has soft feathers covering its skin. Its body is not adapted for protection against predators with sharp teeth.",
    "split":"val",
    "path":"https:\/\/scienceqa-webdemo.s3.us-west-1.amazonaws.com\/extra\/376\/image.png"
  },
  {
    "question":"What is the capital of Wyoming?",
    "choices":[
      "Salem",
      "Anchorage",
      "Laramie",
      "Cheyenne"
    ],
    "answer":3,
    "hint":null,
    "image":"image.png",
    "task":"closed-choice",
    "grade":"grade3",
    "subject":"social science",
    "topic":"geography",
    "category":"State capitals",
    "skill":"Identify the 50 state capitals",
    "lecture":null,
    "solution":"Cheyenne is the capital of Wyoming.",
    "split":"val",
    "path":"https:\/\/scienceqa-webdemo.s3.us-west-1.amazonaws.com\/extra\/384\/image.png"
  },
  {
    "question":"Complete the sentence so that it uses personification.\nThe stars () as we gazed up in wonder.",
    "choices":[
      "glowed",
      "winked"
    ],
    "answer":1,
    "hint":null,
    "image":null,
    "task":"closed-choice",
    "grade":"grade10",
    "subject":"language science",
    "topic":"writing-strategies",
    "category":"Creative techniques",
    "skill":"Use personification",
    "lecture":"Personification is giving human characteristics to nonhuman things. It is a figure of speech that can be used to make writing more interesting or to emphasize a point. The trees danced in the wind. The word danced describes the trees as if they were people. Unlike people, however, trees can't actually dance. Instead, the personification suggests that the trees are moving.",
    "solution":"Complete the sentence with the word winked. It describes the stars as if they were people looking down and noticing us.",
    "split":"val",
    "path":null
  },
  {
    "question":"What is the direction of this push?",
    "choices":[
      "toward his finger",
      "away from his finger"
    ],
    "answer":1,
    "hint":"A child presses a button in an elevator. He uses a force to push the button with his finger.",
    "image":"image.png",
    "task":"closed-choice",
    "grade":"grade4",
    "subject":"natural science",
    "topic":"physics",
    "category":"Force and motion",
    "skill":"Identify directions of forces",
    "lecture":"A force is a push or a pull that one object applies to another. Every force has a direction. The direction of a push is away from the object that is pushing. The direction of a pull is toward the object that is pulling.",
    "solution":"The child pushes the button. The direction of the push is away from his finger.",
    "split":"val",
    "path":"https:\/\/scienceqa-webdemo.s3.us-west-1.amazonaws.com\/extra\/394\/image.png"
  },
  {
    "question":"Which statement describes the Gobi Desert ecosystem?",
    "choices":[
      "It has warm summers and mild winters.",
      "It has a small amount of rain or snow."
    ],
    "answer":1,
    "hint":"Figure: Gobi Desert.\nThe Gobi Desert is a cold desert ecosystem located in northern China and southern Mongolia. This desert is next to the Himalayan Mountains and used to be part of the Mongol Empire.",
    "image":"image.png",
    "task":"closed-choice",
    "grade":"grade8",
    "subject":"natural science",
    "topic":"biology",
    "category":"Ecosystems",
    "skill":"Describe ecosystems",
    "lecture":"An environment includes all of the biotic, or living, and abiotic, or nonliving, things in an area. An ecosystem is created by the relationships that form among the biotic and abiotic parts of an environment. There are many different types of terrestrial, or land-based, ecosystems. Here are some ways in which terrestrial ecosystems can differ from each other: the pattern of weather, or climate the type of soil the organisms that live there",
    "solution":"A cold desert is a type of ecosystem. Cold deserts have the following features: a small amount of rain or snow, dry, thin soil, and long, cold winters. So, the following statements describe the Gobi Desert ecosystem: a small amount of rain or snow, dry, thin soil, and long, cold winters. It has a small amount of rain or snow. It has long, cold winters. The following statement does not describe the Gobi Desert: a small amount of rain or snow, dry, thin soil, and long, cold winters. It has warm summers and mild winters.",
    "split":"val",
    "path":"https:\/\/scienceqa-webdemo.s3.us-west-1.amazonaws.com\/extra\/399\/image.png"
  },
  {
    "question":"What is the capital of Wisconsin?",
    "choices":[
      "Jefferson City",
      "Milwaukee",
      "Nashville",
      "Madison"
    ],
    "answer":3,
    "hint":null,
    "image":"image.png",
    "task":"closed-choice",
    "grade":"grade5",
    "subject":"social science",
    "topic":"geography",
    "category":"State capitals",
    "skill":"Identify state capitals of the Midwest",
    "lecture":null,
    "solution":"Madison is the capital of Wisconsin.",
    "split":"val",
    "path":"https:\/\/scienceqa-webdemo.s3.us-west-1.amazonaws.com\/extra\/416\/image.png"
  },
  {
    "question":"Which of the following could Kenneth's test show?",
    "choices":[
      "how steady a parachute with a 1 m vent was at 200 km per hour",
      "whether a parachute with a 1 m vent would swing too much at 400 km per hour",
      "if the spacecraft was damaged when using a parachute with a 1 m vent going 200 km per hour"
    ],
    "answer":0,
    "hint":"People can use the engineering-design process to develop solutions to problems. One step in the process is testing if a potential solution meets the requirements of the design.\nThe passage below describes how the engineering-design process was used to test a solution to a problem. Read the passage. Then answer the question below.\n\nKenneth was an aerospace engineer who was developing a parachute for a spacecraft that would land on Mars. He needed to add a vent at the center of the parachute so the spacecraft would land smoothly. However, the spacecraft would have to travel at a high speed before landing. If the vent was too big or too small, the parachute might swing wildly at this speed. The movement could damage the spacecraft.\nSo, to help decide how big the vent should be, Kenneth put a parachute with a 1 m vent in a wind tunnel. The wind tunnel made it seem like the parachute was moving at 200 km per hour. He observed the parachute to see how much it swung.\nFigure: a spacecraft's parachute in a wind tunnel.",
    "image":"image.png",
    "task":"closed-choice",
    "grade":"grade8",
    "subject":"natural science",
    "topic":"science-and-engineering-practices",
    "category":"Engineering practices",
    "skill":"Evaluate tests of engineering-design solutions",
    "lecture":"People can use the engineering-design process to develop solutions to problems. One step in the process is testing if a potential solution meets the requirements of the design. How can you determine what a test can show? You need to figure out what was tested and what was measured. Imagine an engineer needs to design a bridge for a windy location. She wants to make sure the bridge will not move too much in high wind. So, she builds a smaller prototype, or model, of a bridge. Then, she exposes the prototype to high winds and measures how much the bridge moves. First, identify what was tested. A test can examine one design, or it may compare multiple prototypes to each other. In the test described above, the engineer tested a prototype of a bridge in high wind. Then, identify what the test measured. One of the criteria for the bridge was that it not move too much in high winds. The test measured how much the prototype bridge moved. Tests can show how well one or more designs meet the criteria. The test described above can show whether the bridge would move too much in high winds.",
    "solution":null,
    "split":"val",
    "path":"https:\/\/scienceqa-webdemo.s3.us-west-1.amazonaws.com\/extra\/418\/image.png"
  },
  {
    "question":"What is the expected ratio of offspring with fuzzy leaves to offspring with smooth leaves? Choose the most likely ratio.",
    "choices":[
      "0:4",
      "1:3",
      "4:0",
      "3:1",
      "2:2"
    ],
    "answer":4,
    "hint":"In a group of summer squash plants, some individuals have fuzzy leaves and others have smooth leaves. In this group, the gene for the leaf texture trait has two alleles. The allele for fuzzy leaves (L) is dominant over the allele for smooth leaves (l).\nThis Punnett square shows a cross between two summer squash plants.",
    "image":"image.png",
    "task":"closed-choice",
    "grade":"grade8",
    "subject":"natural science",
    "topic":"biology",
    "category":"Genes to traits",
    "skill":"Use Punnett squares to calculate ratios of offspring types",
    "lecture":"Offspring phenotypes: dominant or recessive? How do you determine an organism's phenotype for a trait? Look at the combination of alleles in the organism's genotype for the gene that affects that trait. Some alleles have types called dominant and recessive. These two types can cause different versions of the trait to appear as the organism's phenotype. If an organism's genotype has at least one dominant allele for a gene, the organism's phenotype will be the dominant allele's version of the gene's trait. If an organism's genotype has only recessive alleles for a gene, the organism's phenotype will be the recessive allele's version of the gene's trait. A Punnett square shows what types of offspring a cross can produce. The expected ratio of offspring types compares how often the cross produces each type of offspring, on average. To write this ratio, count the number of boxes in the Punnett square representing each type. For example, consider the Punnett square below. <br\/><br\/>  | F | f<br\/> F | FF | Ff<br\/> f | Ff | ff<br\/> <br\/> There is 1 box with the genotype FF and 2 boxes with the genotype Ff. So, the expected ratio of offspring with the genotype FF to those with Ff is 1:2.",
    "solution":"To determine how many boxes in the Punnett square represent offspring with fuzzy leaves or smooth leaves, consider whether each phenotype is the dominant or recessive allele's version of the leaf texture trait. The question tells you that the L allele, which is for fuzzy leaves, is dominant over the l allele, which is for smooth leaves.\nFuzzy leaves is the dominant allele's version of the leaf texture trait. A summer squash plant with the dominant version of the leaf texture trait must have at least one dominant allele for the leaf texture gene. So, offspring with fuzzy leaves must have the genotype LL or Ll.\nThere are 2 boxes in the Punnett square with the genotype LL or Ll. These boxes are highlighted below.\nSmooth leaves is the recessive allele's version of the leaf texture trait. A summer squash plant with the recessive version of the leaf texture trait must have only recessive alleles for the leaf texture gene. So, offspring with smooth leaves must have the genotype ll.\nThere are 2 boxes in the Punnett square with the genotype ll. These boxes are highlighted below.\nSo, the expected ratio of offspring with fuzzy leaves to offspring with smooth leaves is 2:2. This means that, on average, this cross will produce 2 offspring with fuzzy leaves for every 2 offspring with smooth leaves.",
    "split":"val",
    "path":"https:\/\/scienceqa-webdemo.s3.us-west-1.amazonaws.com\/extra\/420\/image.png"
  },
  {
    "question":"Which of the following could Emilio's test show?",
    "choices":[
      "if at least 20% of the park would be shaded by trees in each design",
      "which design would have the least traffic noise in the concert area",
      "which design would have the greatest distance between the concert area and the road"
    ],
    "answer":2,
    "hint":"People can use the engineering-design process to develop solutions to problems. One step in the process is testing if a potential solution meets the requirements of the design.\nThe passage below describes how the engineering-design process was used to test a solution to a problem. Read the passage. Then answer the question below.\n\nEmilio was a landscape architect who was hired to design a new city park. The city council wanted the park to have space for outdoor concerts and to have at least 20% of the park shaded by trees. Emilio thought the concert area should be at least 150 meters from the road so traffic noise didn't interrupt the music. He developed three possible designs for the park with the concert area in a different location in each design. Then, he tested each design by measuring the distance between the road and the concert area.\nFigure: studying an architect's design.",
    "image":"image.png",
    "task":"closed-choice",
    "grade":"grade7",
    "subject":"natural science",
    "topic":"science-and-engineering-practices",
    "category":"Engineering practices",
    "skill":"Evaluate tests of engineering-design solutions",
    "lecture":"People can use the engineering-design process to develop solutions to problems. One step in the process is testing if a potential solution meets the requirements of the design. How can you determine what a test can show? You need to figure out what was tested and what was measured. Imagine an engineer needs to design a bridge for a windy location. She wants to make sure the bridge will not move too much in high wind. So, she builds a smaller prototype, or model, of a bridge. Then, she exposes the prototype to high winds and measures how much the bridge moves. First, identify what was tested. A test can examine one design, or it may compare multiple prototypes to each other. In the test described above, the engineer tested a prototype of a bridge in high wind. Then, identify what the test measured. One of the criteria for the bridge was that it not move too much in high winds. The test measured how much the prototype bridge moved. Tests can show how well one or more designs meet the criteria. The test described above can show whether the bridge would move too much in high winds.",
    "solution":null,
    "split":"val",
    "path":"https:\/\/scienceqa-webdemo.s3.us-west-1.amazonaws.com\/extra\/421\/image.png"
  },
  {
    "question":"Identify the question that Tim's experiment can best answer.",
    "choices":[
      "Can pennies hold more drops of water mixed with dish soap or water mixed with hand soap?",
      "Can pennies hold more drops of pure water or water mixed with hand soap?"
    ],
    "answer":1,
    "hint":"The passage below describes an experiment. Read the passage and then follow the instructions below.\n\nTim used a dropper to put equal-sized drops of pure water, one at a time, onto a penny. The drops stayed together and formed a dome on the penny's surface. Tim recorded the number of drops he could add before the water spilled over the edge of the penny. Then, he rinsed and dried the penny, and repeated the test using water mixed with hand soap. He repeated these trials on nine additional pennies. Tim compared the average number of pure water drops to the average number of water drops mixed with hand soap that he could add to a penny before the water spilled over.\nFigure: a dome of water on the surface of a penny.",
    "image":"image.png",
    "task":"closed-choice",
    "grade":"grade6",
    "subject":"natural science",
    "topic":"science-and-engineering-practices",
    "category":"Designing experiments",
    "skill":"Identify the experimental question",
    "lecture":"Experiments can be designed to answer specific questions. How can you identify the questions that a certain experiment can answer? In order to do this, you need to figure out what was tested and what was measured during the experiment. Imagine an experiment with two groups of daffodil plants. One group of plants was grown in sandy soil, and the other was grown in clay soil. Then, the height of each plant was measured. First, identify the part of the experiment that was tested. The part of an experiment that is tested usually involves the part of the experimental setup that is different or changed. In the experiment described above, each group of plants was grown in a different type of soil. So, the effect of growing plants in different soil types was tested. Then, identify the part of the experiment that was measured. The part of the experiment that is measured may include measurements and calculations. In the experiment described above, the heights of the plants in each group were measured. Experiments can answer questions about how the part of the experiment that is tested affects the part that is measured. So, the experiment described above can answer questions about how soil type affects plant height. Examples of questions that this experiment can answer include: Does soil type affect the height of daffodil plants? Do daffodil plants in sandy soil grow taller than daffodil plants in clay soil? Are daffodil plants grown in sandy soil shorter than daffodil plants grown in clay soil?",
    "solution":null,
    "split":"val",
    "path":"https:\/\/scienceqa-webdemo.s3.us-west-1.amazonaws.com\/extra\/422\/image.png"
  },
  {
    "question":"Think about the magnetic force between the magnets in each pair. Which of the following statements is true?",
    "choices":[
      "The magnetic force is stronger in Pair 1.",
      "The magnetic force is stronger in Pair 2.",
      "The strength of the magnetic force is the same in both pairs."
    ],
    "answer":0,
    "hint":"The images below show two pairs of magnets. The magnets in different pairs do not affect each other. All the magnets shown are made of the same material.",
    "image":"image.png",
    "task":"closed-choice",
    "grade":"grade3",
    "subject":"natural science",
    "topic":"physics",
    "category":"Magnets",
    "skill":"Compare strengths of magnetic forces",
    "lecture":"Magnets can pull or push on each other without touching. When magnets attract, they pull together. When magnets repel, they push apart. These pulls and pushes between magnets are called magnetic forces. The stronger the magnetic force between two magnets, the more strongly the magnets attract or repel each other. You can change the strength of a magnetic force between two magnets by changing the distance between them. The magnetic force is stronger when the magnets are closer together.",
    "solution":"Distance affects the strength of the magnetic force. When magnets are closer together, the magnetic force between them is stronger.\nThe magnets in Pair 1 are closer together than the magnets in Pair 2. So, the magnetic force is stronger in Pair 1 than in Pair 2.",
    "split":"val",
    "path":"https:\/\/scienceqa-webdemo.s3.us-west-1.amazonaws.com\/extra\/426\/image.png"
  },
  {
    "question":"Which word would you find on a dictionary page with the following guide words?\npile - push",
    "choices":[
      "pecan",
      "pot"
    ],
    "answer":1,
    "hint":null,
    "image":null,
    "task":"closed-choice",
    "grade":"grade8",
    "subject":"language science",
    "topic":"reference-skills",
    "category":"Reference skills",
    "skill":"Use guide words",
    "lecture":"Guide words appear on each page of a dictionary. They tell you the first word and last word on the page. The other words on the page come between the guide words in alphabetical order. To put words in alphabetical order, put them in order by their first letters. If the first letters are the same, look at the second letters. If the second letters are the same, look at the third letters, and so on. If one word is shorter, and there are no more letters to compare, then the shorter word comes first in alphabetical order. For example, be comes before bed.",
    "solution":"Put the words in alphabetical order.\nSince pot is between the guide words pile - push, it would be found on that page.",
    "split":"val",
    "path":null
  },
  {
    "question":"Which of these states is farthest west?",
    "choices":[
      "Nebraska",
      "Mississippi",
      "Florida",
      "West Virginia"
    ],
    "answer":0,
    "hint":null,
    "image":"image.png",
    "task":"closed-choice",
    "grade":"grade2",
    "subject":"social science",
    "topic":"geography",
    "category":"Geography",
    "skill":"Read a map: cardinal directions",
    "lecture":"Maps have four cardinal directions, or main directions. Those directions are north, south, east, and west. A compass rose is a set of arrows that point to the cardinal directions. A compass rose usually shows only the first letter of each cardinal direction. The north arrow points to the North Pole. On most maps, north is at the top of the map.",
    "solution":"To find the answer, look at the compass rose. Look at which way the west arrow is pointing. Nebraska is farthest west.",
    "split":"val",
    "path":"https:\/\/scienceqa-webdemo.s3.us-west-1.amazonaws.com\/extra\/449\/image.png"
  },
  {
    "question":"Which change best matches the sentence?\nAn area becomes less wet and less green after years with no rain.",
    "choices":[
      "drought",
      "erosion",
      "landslide"
    ],
    "answer":0,
    "hint":null,
    "image":null,
    "task":"closed-choice",
    "grade":"grade3",
    "subject":"natural science",
    "topic":"earth-science",
    "category":"Earth events",
    "skill":"Classify changes to Earth's surface II",
    "lecture":null,
    "solution":null,
    "split":"val",
    "path":null
  },
  {
    "question":"What is the capital of Colorado?",
    "choices":[
      "Nashville",
      "Laramie",
      "Denver",
      "Boulder"
    ],
    "answer":2,
    "hint":null,
    "image":"image.png",
    "task":"closed-choice",
    "grade":"grade3",
    "subject":"social science",
    "topic":"geography",
    "category":"State capitals",
    "skill":"Identify the 50 state capitals",
    "lecture":null,
    "solution":"Denver is the capital of Colorado.",
    "split":"val",
    "path":"https:\/\/scienceqa-webdemo.s3.us-west-1.amazonaws.com\/extra\/467\/image.png"
  },
  {
    "question":"Which text uses the word disinterested in its traditional sense?",
    "choices":[
      "Patrick is disinterested in reading page after page of restaurant reviews on the Internet; he prefers to try out new restaurants for himself and make up his own mind.",
      "The restaurant reviews on this website are not exactly disinterested\u2014restaurants can pay to remove unflattering reviews\u2014but Patrick still finds it useful for finding new places to eat."
    ],
    "answer":1,
    "hint":null,
    "image":null,
    "task":"closed-choice",
    "grade":"grade12",
    "subject":"language science",
    "topic":"writing-strategies",
    "category":"Word usage and nuance",
    "skill":"Explore words with new or contested usages",
    "lecture":"Words change in meaning when speakers begin using them in new ways. For example, the word peruse once only meant to examine in detail, but it's now also commonly used to mean to look through in a casual manner. When a word changes in meaning, its correct usage is often debated. Although a newer sense of the word may be more commonly used, many people consider a word's traditional definition to be the correct usage. Being able to distinguish the different uses of a word can help you use it appropriately for different audiences. Britney perused her notes, carefully preparing for her exam. The traditional usage above is considered more standard. David perused the magazine, absentmindedly flipping through the pages. The nontraditional usage above is now commonly used, but traditional style guides generally advise against it.",
    "solution":"The first text uses disinterested in its traditional sense: unbiased or impartial.\nThe restaurant reviews on this website are not exactly disinterested\u2014restaurants can pay to remove unflattering reviews\u2014but Patrick still finds it useful for finding new places to eat.\nThe second text uses disinterested in its nontraditional sense: uninterested or indifferent.\nPatrick is disinterested in reading page after page of restaurant reviews on the Internet; he prefers to try out new restaurants for himself and make up his own mind.\nMost style guides recommend to use the traditional sense of the word disinterested because it is considered more standard.",
    "split":"val",
    "path":null
  },
  {
    "question":"Which trait did Ichthyornis have? Select the trait you can observe in the drawing.",
    "choices":[
      "fur",
      "a short tail"
    ],
    "answer":1,
    "hint":"This drawing shows the skeleton of an ancient animal called Ichthyornis. This drawing was made by looking at the animal's fossils.",
    "image":"image.png",
    "task":"closed-choice",
    "grade":"grade6",
    "subject":"natural science",
    "topic":"earth-science",
    "category":"Fossils",
    "skill":"Compare fossils to modern organisms",
    "lecture":"The way an organism looks or acts is called a trait. Scientists use fossils to learn more about the traits of ancient organisms. Fossils can preserve the remains of body parts and activities. A fossil of a body part, such as a tail or a wing, can tell you what an organism looked like. A fossil of an organism's activities, such as a burrow or a footprint, can tell you about the organism's behavior. Here are three examples of fossils and the traits that you can observe from them: This is a fossil of an animal. This fossil tells you that the animal had a spiral-shaped shell. This is a fossil of a plant. This fossil tells you that the plant had small leaves arranged in a branched pattern. This is a fossil of an animal's footprint. This fossil tells you that the animal could walk on land. An organism's fossil may not show all of the organism's traits. This is because most body parts are destroyed during fossil formation. When an organism's body turns into a fossil, only a few body parts are usually preserved.",
    "solution":null,
    "split":"val",
    "path":"https:\/\/scienceqa-webdemo.s3.us-west-1.amazonaws.com\/extra\/475\/image.png"
  },
  {
    "question":"Which change better matches the sentence?\nWater builds up in a city after heavy rain.",
    "choices":[
      "drought",
      "flood"
    ],
    "answer":1,
    "hint":null,
    "image":null,
    "task":"closed-choice",
    "grade":"grade2",
    "subject":"natural science",
    "topic":"earth-science",
    "category":"Earth events",
    "skill":"Classify changes to Earth's surface",
    "lecture":null,
    "solution":null,
    "split":"val",
    "path":null
  },
  {
    "question":"Which logical fallacy is used in the text?\nI don't trust Professor Chang's findings. Another researcher at her university was caught falsifying data. So, it's likely Professor Chang has, too.",
    "choices":[
      "straw man: a misrepresentation of an opponent's position that makes it easier to argue against",
      "guilt by association: a negative association intended to discredit someone or something",
      "bandwagon fallacy: the assumption that the popular choice is automatically correct"
    ],
    "answer":1,
    "hint":null,
    "image":null,
    "task":"closed-choice",
    "grade":"grade10",
    "subject":"language science",
    "topic":"writing-strategies",
    "category":"Developing and supporting arguments",
    "skill":"Classify logical fallacies",
    "lecture":"A strong argument uses valid reasoning and logic in support of a claim. When an argument or claim introduces irrelevant information or misrepresents the issues at hand, it may be committing a logical fallacy. Logical fallacies can hurt a writer's credibility and can lead readers to draw false conclusions. A logical fallacy may present irrelevant information: <br\/><br\/> Fallacy | Description<br\/> ad hominem | an attack against the person making the argument, rather than the argument itself<br\/> appeal to nature | an argument that assumes the natural choice is always the best choice<br\/> bandwagon fallacy | an argument that assumes the popular choice is always the best choice<br\/> circular reasoning | an argument that supports a claim with the claim itself<br\/> guilt by association | an unfair negative association with another person or group that is intended to discredit someone or something<br\/> <br\/> A logical fallacy may misrepresent the issues at hand: <br\/><br\/> Fallacy | Description<br\/> false causation | the assumption that because two things happened together, one caused the other<br\/> false dichotomy | an argument that presents only two choices when more options exist<br\/> hasty generalization | a broad claim based on too few observations<br\/> slippery slope fallacy | the false assumption that a small first step will necessarily lead to extreme consequences<br\/> straw man | a misrepresentation of an opponent's position that makes it easier to argue against<br\/>",
    "solution":"The text argues that Professor Chang's research is untrustworthy because someone else at her university was caught falsifying data. However, this isn't necessarily true. The practices of one researcher at a university do not necessarily reflect the practices of another researcher at the same university. This illustrates a type of logical fallacy known as guilt by association.",
    "split":"val",
    "path":null
  },
  {
    "question":"What is the source of the allusion in the sentence below?\nSappy love songs are Kryptonite to my otherwise stoic father.",
    "choices":[
      "U.S. history",
      "a comic"
    ],
    "answer":1,
    "hint":null,
    "image":null,
    "task":"closed-choice",
    "grade":"grade9",
    "subject":"language science",
    "topic":"figurative-language",
    "category":"Literary devices",
    "skill":"Recall the source of an allusion",
    "lecture":"An allusion is a brief mention of something or someone well known, often from mythology, history, or literature. An allusion lets you reference ideas from an entire story in just a few words. \"I'd better get home before I turn into a pumpkin!\" Lila remarked. Here, Lila alludes to the fairy tale \"Cinderella,\" in which Cinderella must leave the ball before the coach that brought her transforms into a pumpkin. The allusion shows that Lila must depart immediately.",
    "solution":"The source of the allusion Kryptonite is a comic.\nKryptonite, matter from Superman's home planet, is the only thing that can reduce the superhero's strength.\nThe allusion Kryptonite means a source of weakness.",
    "split":"val",
    "path":null
  },
  {
    "question":"Is perfume a mineral?",
    "choices":[
      "no",
      "yes"
    ],
    "answer":0,
    "hint":"Perfume has the following properties:\nnot a pure substance\nliquid\nhuman-made\nno fixed crystal structure",
    "image":"image.png",
    "task":"yes-or-no",
    "grade":"grade5",
    "subject":"natural science",
    "topic":"earth-science",
    "category":"Rocks and minerals",
    "skill":"Identify rocks and minerals",
    "lecture":"Properties are used to identify different substances. Minerals have the following properties: It is a solid. It is formed in nature. It is not made by organisms. It is a pure substance. It has a fixed crystal structure. If a substance has all five of these properties, then it is a mineral. Look closely at the last three properties: A mineral is not made by organisms. Organisms make their own body parts. For example, snails and clams make their shells. Because they are made by organisms, body parts cannot be minerals. Humans are organisms too. So, substances that humans make by hand or in factories cannot be minerals. A mineral is a pure substance. A pure substance is made of only one type of matter. All minerals are pure substances. A mineral has a fixed crystal structure. The crystal structure of a substance tells you how the atoms or molecules in the substance are arranged. Different types of minerals have different crystal structures, but all minerals have a fixed crystal structure. This means that the atoms or molecules in different pieces of the same type of mineral are always arranged the same way.",
    "solution":"Perfume does not have all the properties of a mineral. So, perfume is not a mineral.",
    "split":"val",
    "path":"https:\/\/scienceqa-webdemo.s3.us-west-1.amazonaws.com\/extra\/497\/image.png"
  },
  {
    "question":"Select the temperature shown by this thermometer.",
    "choices":[
      "105\u00b0F",
      "95\u00b0F",
      "70\u00b0F"
    ],
    "answer":1,
    "hint":null,
    "image":null,
    "task":"closed-choice",
    "grade":"grade3",
    "subject":"natural science",
    "topic":"units-and-measurement",
    "category":"Weather and climate",
    "skill":"Read a thermometer",
    "lecture":"A thermometer is a tool that measures temperature. Temperature can be measured in degrees. The symbol for degrees is \u00b0. Some thermometers measure temperature in degrees Fahrenheit (\u00b0F). Fahrenheit is one scale used to measure temperature. This is a tube thermometer. It has a tube filled with a red liquid. There is a Fahrenheit scale along the right side of the tube. The top of the red liquid lines up with the number 80 on the scale. So, the temperature shown by this thermometer is 80\u00b0F.",
    "solution":"Find the top of the red liquid.\nNow look at the scale to the right. The top of the red liquid is halfway between 90 and 100. So, the temperature is 95\u00b0F.",
    "split":"val",
    "path":null
  },
  {
    "question":"What is the probability that a rabbit produced by this cross will have black fur?",
    "choices":[
      "4\/4",
      "1\/4",
      "3\/4",
      "0\/4",
      "2\/4"
    ],
    "answer":0,
    "hint":"In a group of rabbits, some individuals have black fur and others have brown fur. In this group, the gene for the fur color trait has two alleles. The allele for brown fur (f) is recessive to the allele for black fur (F).\nThis Punnett square shows a cross between two rabbits.",
    "image":"image.png",
    "task":"closed-choice",
    "grade":"grade8",
    "subject":"natural science",
    "topic":"biology",
    "category":"Genes to traits",
    "skill":"Use Punnett squares to calculate probabilities of offspring types",
    "lecture":"Offspring phenotypes: dominant or recessive? How do you determine an organism's phenotype for a trait? Look at the combination of alleles in the organism's genotype for the gene that affects that trait. Some alleles have types called dominant and recessive. These two types can cause different versions of the trait to appear as the organism's phenotype. If an organism's genotype has at least one dominant allele for a gene, the organism's phenotype will be the dominant allele's version of the gene's trait. If an organism's genotype has only recessive alleles for a gene, the organism's phenotype will be the recessive allele's version of the gene's trait. In a Punnett square, each box represents a different outcome, or result. Each of the four outcomes is equally likely to happen. Each box represents one way the parents' alleles can combine to form an offspring's genotype. Because there are four boxes in the Punnett square, there are four possible outcomes. An event is a set of one or more outcomes. The probability of an event is a measure of how likely the event is to happen. This probability is a number between 0 and 1, and it can be written as a fraction: probability of an event = number of ways the event can happen \/ number of equally likely outcomes You can use a Punnett square to calculate the probability that a cross will produce certain offspring. For example, the Punnett square below has two boxes with the genotype Ff. It has one box with the genotype FF and one box with the genotype ff. This means there are two ways the parents' alleles can combine to form Ff. There is one way they can combine to form FF and one way they can combine to form ff. <br\/><br\/>  | F | f<br\/> F | FF | Ff<br\/> f | Ff | ff<br\/> <br\/> Consider an event in which this cross produces an offspring with the genotype ff. The probability of this event is given by the following fraction: number of ways the event can happen \/ number of equally likely outcomes = number of boxes with the genotype ff \/ total number of boxes = 1 \/ 4.",
    "solution":null,
    "split":"val",
    "path":"https:\/\/scienceqa-webdemo.s3.us-west-1.amazonaws.com\/extra\/505\/image.png"
  },
  {
    "question":"Which is a complex sentence?",
    "choices":[
      "Despite their large size, grizzly bears can run at speeds of up to thirty miles per hour.",
      "In the early morning, I drank tea by a spice stall as the Turkish bazaar came to life."
    ],
    "answer":1,
    "hint":null,
    "image":null,
    "task":"closed-choice",
    "grade":"grade5",
    "subject":"language science",
    "topic":"grammar",
    "category":"Sentences, fragments, and run-ons",
    "skill":"Is the sentence simple, compound, or complex?",
    "lecture":"A clause is a group of words that contains both a subject and a predicate. An independent clause is a complete thought. It can stand alone as a sentence. A dependent clause is not a complete thought. It cannot stand alone as a sentence. the oranges on our tree are ripe The clause can stand alone. It is independent. after we pick up Kevin from work The clause cannot stand alone. It is dependent. A simple sentence is made up of a single independent clause. Ben and I spent all day relaxing by the pool. Some simple sentences have introductory phrases, but the introductory phrase is part of the predicate. In the winter, Ben usually wears his heavy coat. Ben usually wears his heavy coat in the winter. A compound sentence is made up of two independent clauses joined by a coordinating conjunction such as and, but, or, or so. We saw a flash of lightning, and seconds later we heard the rumble of thunder. A complex sentence is made up of an independent clause and a dependent clause. The dependent clause usually begins with a subordinating conjunction such as after, although, as, because, before, if, since, unless, until, when, or while. If she ever gets the chance, Terri would love to visit the Egyptian pyramids.",
    "solution":"The first sentence is the complex sentence. It is made up of an independent clause and a dependent clause. The dependent clause begins with the subordinating conjunction as.\nIn the early morning, I drank tea by a spice stall as the Turkish bazaar came to life.",
    "split":"val",
    "path":null
  },
  {
    "question":"Which tense does the sentence use?\nWe will miss you very much!",
    "choices":[
      "past tense",
      "future tense",
      "present tense"
    ],
    "answer":1,
    "hint":null,
    "image":null,
    "task":"closed-choice",
    "grade":"grade2",
    "subject":"language science",
    "topic":"verbs",
    "category":"Verb tense",
    "skill":"Is the sentence in the past, present, or future tense?",
    "lecture":"Present tense verbs tell you about something that is happening now. Most present-tense verbs are regular. They have no ending, or they end in -s or -es. Two verbs are irregular in the present tense, to be and to have. You must remember their forms. Past tense verbs tell you about something that has already happened. Most past-tense verbs are regular. They end in -ed. Some verbs are irregular in the past tense. You must remember their past-tense forms. Future tense verbs tell you about something that is going to happen. All future-tense verbs use the word will. <br\/><br\/> Present | Past | Future<br\/> walk, walks | walked | will walk<br\/> go, goes | went | will go<br\/>",
    "solution":"The sentence is in future tense. You can tell because it uses will before the main verb, miss. The verb tells you about something that is going to happen.",
    "split":"val",
    "path":null
  },
  {
    "question":"Select the vertebrate.",
    "choices":[
      "pipevine swallowtail butterfly",
      "ladybug",
      "great blue heron",
      "crown jellyfish"
    ],
    "answer":2,
    "hint":"Hint: Mammals, birds, fish, reptiles, and amphibians are vertebrates.",
    "image":null,
    "task":"closed-choice",
    "grade":"grade5",
    "subject":"natural science",
    "topic":"biology",
    "category":"Classification",
    "skill":"Identify vertebrates and invertebrates",
    "lecture":"Vertebrates and invertebrates are both groups of animals. A vertebrate has a backbone. The backbone is made of many bones in an animal's back. A vertebrate's backbone helps connect the different parts of its body. In the drawings below, each vertebrate's backbone is colored orange. An invertebrate does not have a backbone. In fact, invertebrates do not have any bones! Some invertebrates have an outer cover on their body called an exoskeleton. Other invertebrates have a soft body.",
    "solution":"A ladybug is an insect. Like other insects, a ladybug is an invertebrate. It does not have a backbone. It has an exoskeleton.\nA great blue heron is a bird. Like other birds, a great blue heron is a vertebrate. It has a backbone.\nLike other jellyfishes, a crown jellyfish is an invertebrate. It does not have a backbone. It has a soft body.\nA pipevine swallowtail butterfly is an insect. Like other insects, a pipevine swallowtail butterfly is an invertebrate. It does not have a backbone. It has an exoskeleton.",
    "split":"val",
    "path":null
  },
  {
    "question":"Based on this information, what is Jinx's genotype for the agouti fur gene?",
    "choices":[
      "aa",
      "not having agouti fur"
    ],
    "answer":0,
    "hint":"This passage describes the agouti fur trait in cats:\n\nIn a group of cats, some individuals have agouti fur and others do not. In this group, the gene for the agouti fur trait has two alleles. The allele A is for having agouti fur, and the allele a is for not having agouti fur.\nJinx, a cat from this group, does not have agouti fur. Jinx has two alleles for not having agouti fur.",
    "image":null,
    "task":"closed-choice",
    "grade":"grade8",
    "subject":"natural science",
    "topic":"biology",
    "category":"Genes to traits",
    "skill":"Genetics vocabulary: genotype and phenotype",
    "lecture":"All organisms have pieces of hereditary material called genes, which are passed from parents to offspring. Genes contain instructions for building the parts of an organism. An organism's genes affect its observable traits, including its appearance, its behavior, and which diseases it may have. Genes may have different alleles, or forms, that can cause different versions of a trait. For example, flower color is a trait in pea plants. The gene for this trait has two possible alleles. Each allele is represented by an uppercase or lowercase letter. The allele F is for purple flowers, and the allele f is for white flowers. Each pea plant has two alleles for the flower color gene\u2014one allele inherited from each parent. An organism's genotype for a gene is its combination of alleles for that gene. So, a pea plant may have a genotype of FF, Ff, or ff for the flower color gene. An organism's phenotype for a trait is its observable version of that trait, which depends on the organism's combination of alleles. A pea plant may have a phenotype of purple flowers or white flowers for the flower color trait.",
    "solution":"An organism's genotype for a gene is its combination of alleles for that gene. Jinx has two alleles for not having agouti fur (a). So, Jinx's genotype for the agouti fur gene is aa.",
    "split":"val",
    "path":null
  },
  {
    "question":"Which of these states is farthest west?",
    "choices":[
      "Indiana",
      "Missouri",
      "Mississippi",
      "Colorado"
    ],
    "answer":3,
    "hint":null,
    "image":"image.png",
    "task":"closed-choice",
    "grade":"grade3",
    "subject":"social science",
    "topic":"geography",
    "category":"Geography",
    "skill":"Read a map: cardinal directions",
    "lecture":"Maps have four cardinal directions, or main directions. Those directions are north, south, east, and west. A compass rose is a set of arrows that point to the cardinal directions. A compass rose usually shows only the first letter of each cardinal direction. The north arrow points to the North Pole. On most maps, north is at the top of the map.",
    "solution":"To find the answer, look at the compass rose. Look at which way the west arrow is pointing. Colorado is farthest west.",
    "split":"val",
    "path":"https:\/\/scienceqa-webdemo.s3.us-west-1.amazonaws.com\/extra\/547\/image.png"
  },
  {
    "question":"During this time, thermal energy was transferred from () to ().",
    "choices":[
      "the surroundings . . . each aquarium",
      "each aquarium . . . the surroundings"
    ],
    "answer":1,
    "hint":"Two identical aquariums were next to an open window. One aquarium had a plastic cover on it, and the other was uncovered. This table shows how the temperature of each aquarium changed over 1.5hours.",
    "image":"image.png",
    "task":"closed-choice",
    "grade":"grade7",
    "subject":"natural science",
    "topic":"physics",
    "category":"Thermal energy",
    "skill":"Compare thermal energy transfers",
    "lecture":"A change in an object's temperature indicates a change in the object's thermal energy: An increase in temperature shows that the object's thermal energy increased. So, thermal energy was transferred into the object from its surroundings. A decrease in temperature shows that the object's thermal energy decreased. So, thermal energy was transferred out of the object to its surroundings.",
    "solution":"The temperature of each aquarium decreased, which means that the thermal energy of each aquarium decreased. So, thermal energy was transferred from each aquarium to the surroundings.",
    "split":"val",
    "path":"https:\/\/scienceqa-webdemo.s3.us-west-1.amazonaws.com\/extra\/560\/image.png"
  },
  {
    "question":"Which ocean is highlighted?",
    "choices":[
      "the Atlantic Ocean",
      "the Pacific Ocean",
      "the Indian Ocean",
      "the Southern Ocean"
    ],
    "answer":1,
    "hint":null,
    "image":"image.png",
    "task":"closed-choice",
    "grade":"grade6",
    "subject":"social science",
    "topic":"geography",
    "category":"Physical Geography",
    "skill":"Oceans and continents",
    "lecture":"Oceans are huge bodies of salt water. The world has five oceans. All of the oceans are connected, making one world ocean.",
    "solution":"This is the Pacific Ocean.",
    "split":"val",
    "path":"https:\/\/scienceqa-webdemo.s3.us-west-1.amazonaws.com\/extra\/570\/image.png"
  },
  {
    "question":"Which better describes the Monongahela National Forest ecosystem?",
    "choices":[
      "It has warm, dry summers. It also has many different types of trees.",
      "It has warm, wet summers. It also has only a few types of trees."
    ],
    "answer":1,
    "hint":"Figure: Monongahela National Forest.\nThe Monongahela National Forest is a temperate deciduous forest ecosystem in eastern West Virginia.",
    "image":"image.png",
    "task":"closed-choice",
    "grade":"grade4",
    "subject":"natural science",
    "topic":"biology",
    "category":"Ecosystems",
    "skill":"Describe ecosystems",
    "lecture":"An environment includes all of the biotic, or living, and abiotic, or nonliving, things in an area. An ecosystem is created by the relationships that form among the biotic and abiotic parts of an environment. There are many different types of terrestrial, or land-based, ecosystems. Here are some ways in which terrestrial ecosystems can differ from each other: the pattern of weather, or climate the type of soil the organisms that live there",
    "solution":"A temperate deciduous forest is a type of ecosystem. Temperate deciduous forests have the following features: warm, wet summers and cold, wet winters, soil that is rich in nutrients, and only a few types of trees. So, the Monongahela National Forest has warm, wet summers. It also has only a few types of trees.",
    "split":"val",
    "path":"https:\/\/scienceqa-webdemo.s3.us-west-1.amazonaws.com\/extra\/571\/image.png"
  },
  {
    "question":"Select the reptile below.",
    "choices":[
      "leaf-tailed gecko",
      "Banggai cardinalfish",
      "red-eyed tree frog",
      "clownfish"
    ],
    "answer":0,
    "hint":"Reptiles have scaly, waterproof skin. Most reptiles live on land.\nReptiles are cold-blooded. The body temperature of cold-blooded animals depends on their environment.\nA box turtle is an example of a reptile.",
    "image":"image.png",
    "task":"closed-choice",
    "grade":"grade4",
    "subject":"natural science",
    "topic":"biology",
    "category":"Classification",
    "skill":"Identify mammals, birds, fish, reptiles, and amphibians",
    "lecture":"Birds, mammals, fish, reptiles, and amphibians are groups of animals. Scientists sort animals into each group based on traits they have in common. This process is called classification. Classification helps scientists learn about how animals live. Classification also helps scientists compare similar animals.",
    "solution":"A leaf-tailed gecko is a reptile. It has scaly, waterproof skin.\nMany geckos have special pads on their toes. The pads help them climb up plants and rocks.\nA clownfish is a fish. It lives underwater. It has fins, not limbs.\nClownfish live with animals called anemones. In the image of the clownfish, you can see the brown anemone surrounding the clownfish.\nA red-eyed tree frog is an amphibian. It has moist skin and begins its life in water.\nA red-eyed tree frog has sticky pads on its toes. The sticky pads help the red-eyed tree frog hold on to leaves.\nA Banggai cardinalfish is a fish. It lives underwater. It has fins, not limbs.\nCardinalfish often live near coral reefs. They are nocturnal, which means that they are active mostly at night.",
    "split":"val",
    "path":"https:\/\/scienceqa-webdemo.s3.us-west-1.amazonaws.com\/extra\/580\/image.png"
  },
  {
    "question":"What is the mass of an elephant?",
    "choices":[
      "6,090 kilograms",
      "6,090 grams"
    ],
    "answer":0,
    "hint":"Select the better estimate.",
    "image":null,
    "task":"closed-choice",
    "grade":"grade5",
    "subject":"natural science",
    "topic":"units-and-measurement",
    "category":"Units and measurement",
    "skill":"Choose metric units of mass",
    "lecture":"Measurements are written with both a number and a unit. The unit comes after the number. The unit shows what the number means. Mass is a measurement of how much matter something contains. There are many different units of mass. When you are using metric units, mass may be written with units of grams or kilograms. There are 1,000 grams in 1 kilogram. So, 1 gram is much less than 1 kilogram. A paper clip has a mass of about 1 gram, while a textbook has a mass of about 1 kilogram.",
    "solution":"The better estimate for the mass of an elephant is 6,090 kilograms.\n6,090 grams is too light.",
    "split":"val",
    "path":null
  },
  {
    "question":"Select the amphibian below.",
    "choices":[
      "red-eyed tree frog",
      "robin"
    ],
    "answer":0,
    "hint":"Amphibians have moist skin and begin their lives in water. A green frog is an example of an amphibian.",
    "image":"image.png",
    "task":"closed-choice",
    "grade":"grade2",
    "subject":"natural science",
    "topic":"biology",
    "category":"Classification",
    "skill":"Identify mammals, birds, fish, reptiles, and amphibians",
    "lecture":"Birds, mammals, fish, reptiles, and amphibians are groups of animals. The animals in each group have traits in common. Scientists sort animals into groups based on traits they have in common. This process is called classification.",
    "solution":"A robin is a bird. It has feathers, two wings, and a beak.\nA red-eyed tree frog is an amphibian. It has moist skin and begins its life in water.",
    "split":"val",
    "path":"https:\/\/scienceqa-webdemo.s3.us-west-1.amazonaws.com\/extra\/586\/image.png"
  },
  {
    "question":"Think about the magnetic force between the magnets in each pair. Which of the following statements is true?",
    "choices":[
      "The magnitude of the magnetic force is smaller in Pair 2.",
      "The magnitude of the magnetic force is smaller in Pair 1.",
      "The magnitude of the magnetic force is the same in both pairs."
    ],
    "answer":1,
    "hint":"The images below show two pairs of magnets. The magnets in different pairs do not affect each other. All the magnets shown are made of the same material.",
    "image":"image.png",
    "task":"closed-choice",
    "grade":"grade7",
    "subject":"natural science",
    "topic":"physics",
    "category":"Velocity, acceleration, and forces",
    "skill":"Compare magnitudes of magnetic forces",
    "lecture":"Magnets can pull or push on each other without touching. When magnets attract, they pull together. When magnets repel, they push apart. These pulls and pushes between magnets are called magnetic forces. The strength of a force is called its magnitude. The greater the magnitude of the magnetic force between two magnets, the more strongly the magnets attract or repel each other. You can change the magnitude of a magnetic force between two magnets by changing the distance between them. The magnitude of the magnetic force is smaller when there is a greater distance between the magnets.",
    "solution":"Distance affects the magnitude of the magnetic force. When there is a greater distance between magnets, the magnitude of the magnetic force between them is smaller.\nThere is a greater distance between the magnets in Pair 1 than in Pair 2. So, the magnitude of the magnetic force is smaller in Pair 1 than in Pair 2.",
    "split":"val",
    "path":"https:\/\/scienceqa-webdemo.s3.us-west-1.amazonaws.com\/extra\/590\/image.png"
  },
  {
    "question":"Which continent is highlighted?",
    "choices":[
      "Australia",
      "South America",
      "Antarctica",
      "North America"
    ],
    "answer":3,
    "hint":null,
    "image":"image.png",
    "task":"closed-choice",
    "grade":"grade4",
    "subject":"social science",
    "topic":"geography",
    "category":"Oceans and continents\t",
    "skill":"Identify oceans and continents",
    "lecture":"A continent is one of the major land masses on the earth. Most people say there are seven continents.",
    "solution":"This continent is North America.",
    "split":"val",
    "path":"https:\/\/scienceqa-webdemo.s3.us-west-1.amazonaws.com\/extra\/591\/image.png"
  },
  {
    "question":"What is the volume of a kiddie pool?",
    "choices":[
      "275 gallons",
      "275 cups",
      "275 fluid ounces"
    ],
    "answer":0,
    "hint":"Select the best estimate.",
    "image":null,
    "task":"closed-choice",
    "grade":"grade4",
    "subject":"natural science",
    "topic":"units-and-measurement",
    "category":"Units and measurement",
    "skill":"Choose customary units of volume",
    "lecture":"Measurements are written with both a number and a unit. The unit comes after the number. The unit shows what the number means. Volume is a measurement of how much space something takes up. There are many different units of volume. When you are using customary units, volume may be written in units of fluid ounces, cups, or gallons. As the diagram shows, there are 8 fluid ounces in 1 cup and 16 cups in 1 gallon. So, 1 fluid ounce is less than 1 cup and much less than 1 gallon. A glass of milk has a volume of about 8 fluid ounces, or 1 cup. A jug of milk has a volume of 1 gallon.",
    "solution":"The best estimate for the volume of a kiddie pool is 275 gallons.\n275 fluid ounces and 275 cups are both too little.",
    "split":"val",
    "path":null
  },
  {
    "question":"Look at the word. Does it have a closed syllable or an open syllable?\nmen",
    "choices":[
      "closed",
      "open"
    ],
    "answer":0,
    "hint":null,
    "image":null,
    "task":"closed-choice",
    "grade":"grade2",
    "subject":"language science",
    "topic":"word-study",
    "category":"Short and long vowels",
    "skill":"Is the syllable open or closed?",
    "lecture":"Words are made up of syllables. Two kinds of syllables are closed and open. A closed syllable has one vowel and ends with a consonant. It usually has a short vowel sound. desk: short e kit \/ ten: short i \/ short e An open syllable ends with one vowel. It usually has a long vowel sound. go: long o he \/ ro: long e \/ long o Some open syllables end with y. The y makes a long e sound or a long i sound. sky: long i ba \/ by: long a \/ long e",
    "solution":"The word men ends with a consonant and has a short vowel sound. So, it has a closed syllable.",
    "split":"val",
    "path":null
  },
  {
    "question":"What is the capital of Idaho?",
    "choices":[
      "Salt Lake City",
      "Topeka",
      "Boise",
      "Denver"
    ],
    "answer":2,
    "hint":null,
    "image":"image.png",
    "task":"closed-choice",
    "grade":"grade4",
    "subject":"social science",
    "topic":"geography",
    "category":"State capitals",
    "skill":"Identify state capitals of the West",
    "lecture":null,
    "solution":"Boise is the capital of Idaho.",
    "split":"val",
    "path":"https:\/\/scienceqa-webdemo.s3.us-west-1.amazonaws.com\/extra\/598\/image.png"
  },
  {
    "question":"Is gneiss a mineral or a rock?",
    "choices":[
      "mineral",
      "rock"
    ],
    "answer":1,
    "hint":"Gneiss has the following properties:\nnot a pure substance\nnot made by organisms\nfound in nature\nmade of light and dark mineral grains\nno fixed crystal structure\nsolid",
    "image":"image.png",
    "task":"closed-choice",
    "grade":"grade8",
    "subject":"natural science",
    "topic":"earth-science",
    "category":"Rocks and minerals",
    "skill":"Identify rocks and minerals",
    "lecture":"Minerals are the building blocks of rocks. A rock can be made of one or more minerals. Minerals and rocks have the following properties: <br\/><br\/> Property | Mineral | Rock<br\/> It is a solid. | Yes | Yes<br\/> It is formed in nature. | Yes | Yes<br\/> It is not made by organisms. | Yes | Yes<br\/> It is a pure substance. | Yes | No<br\/> It has a fixed crystal structure. | Yes | No<br\/> <br\/> You can use these properties to tell whether a substance is a mineral, a rock, or neither. Look closely at the last three properties: Minerals and rocks are not made by organisms. Organisms make their own body parts. For example, snails and clams make their shells. Because they are made by organisms, body parts cannot be  minerals or rocks. Humans are organisms too. So, substances that humans make by hand or in factories are not minerals or rocks. A mineral is a pure substance, but a rock is not. A pure substance is made of only one type of matter.  Minerals are pure substances, but rocks are not. Instead, all rocks are mixtures. A mineral has a fixed crystal structure, but a rock does not. The crystal structure of a substance tells you how the atoms or molecules in the substance are arranged. Different types of minerals have different crystal structures, but all minerals have a fixed crystal structure. This means that the atoms and molecules in different pieces of the same type of mineral are always arranged the same way. However, rocks do not have a fixed crystal structure. So, the arrangement of atoms or molecules in different pieces of the same type of rock may be different!",
    "solution":"The properties of gneiss match the properties of a rock. So, gneiss is a rock.",
    "split":"val",
    "path":"https:\/\/scienceqa-webdemo.s3.us-west-1.amazonaws.com\/extra\/606\/image.png"
  },
  {
    "question":"Based on this information, what is Oliver's genotype for the agouti fur gene?",
    "choices":[
      "AA",
      "having agouti fur"
    ],
    "answer":0,
    "hint":"This passage describes the agouti fur trait in cats:\n\nIn a group of cats, some individuals have agouti fur and others do not. In this group, the gene for the agouti fur trait has two alleles. The allele A is for having agouti fur, and the allele a is for not having agouti fur.\nOliver, a cat from this group, has agouti fur. Oliver has two alleles for having agouti fur.",
    "image":null,
    "task":"closed-choice",
    "grade":"grade8",
    "subject":"natural science",
    "topic":"biology",
    "category":"Genes to traits",
    "skill":"Genetics vocabulary: genotype and phenotype",
    "lecture":"All organisms have pieces of hereditary material called genes, which are passed from parents to offspring. Genes contain instructions for building the parts of an organism. An organism's genes affect its observable traits, including its appearance, its behavior, and which diseases it may have. Genes may have different alleles, or forms, that can cause different versions of a trait. For example, flower color is a trait in pea plants. The gene for this trait has two possible alleles. Each allele is represented by an uppercase or lowercase letter. The allele F is for purple flowers, and the allele f is for white flowers. Each pea plant has two alleles for the flower color gene\u2014one allele inherited from each parent. An organism's genotype for a gene is its combination of alleles for that gene. So, a pea plant may have a genotype of FF, Ff, or ff for the flower color gene. An organism's phenotype for a trait is its observable version of that trait, which depends on the organism's combination of alleles. A pea plant may have a phenotype of purple flowers or white flowers for the flower color trait.",
    "solution":"An organism's genotype for a gene is its combination of alleles for that gene. Oliver has two alleles for having agouti fur (A). So, Oliver's genotype for the agouti fur gene is AA.",
    "split":"val",
    "path":null
  },
  {
    "question":"Is the following statement about our solar system true or false?\n75% of the planets are made mainly of rock.",
    "choices":[
      "true",
      "false"
    ],
    "answer":1,
    "hint":"Use the data to answer the question below.",
    "image":"image.png",
    "task":"true-or-false",
    "grade":"grade7",
    "subject":"natural science",
    "topic":"earth-science",
    "category":"Astronomy",
    "skill":"Analyze data to compare properties of planets",
    "lecture":"A planet's volume tells you the size of the planet. The primary composition of a planet is what the planet is made mainly of. In our solar system, planets are made mainly of rock, gas, or ice.",
    "solution":"The table tells you that four out of the eight planets are made mainly of rock. So, one-half, or 50%, of the planets are made mainly of rock.",
    "split":"val",
    "path":"https:\/\/scienceqa-webdemo.s3.us-west-1.amazonaws.com\/extra\/610\/image.png"
  },
  {
    "question":"What is the source of the allusion in the sentence below?\nYesterday's tennis match was a classic David and Goliath story, with Stanley playing against his former team captain, Richard.",
    "choices":[
      "the Bible",
      "a poem"
    ],
    "answer":0,
    "hint":null,
    "image":null,
    "task":"closed-choice",
    "grade":"grade7",
    "subject":"language science",
    "topic":"figurative-language",
    "category":"Literary devices",
    "skill":"Recall the source of an allusion",
    "lecture":"An allusion is a brief mention of something or someone well known, often from mythology, history, or literature. An allusion lets you reference ideas from an entire story in just a few words. \"I'd better get home before I turn into a pumpkin!\" Lila remarked. Here, Lila alludes to the fairy tale \"Cinderella,\" in which Cinderella must leave the ball before the coach that brought her transforms into a pumpkin. The allusion shows that Lila must depart immediately.",
    "solution":"The source of the allusion David and Goliath is the Bible.\nIn the Bible, a young man named David slays Goliath, a giant and champion warrior, using nothing more than a sling and a stone.\nThe allusion David and Goliath means involving unequal rivals.",
    "split":"val",
    "path":null
  },
  {
    "question":"What do these two changes have in common?\na piece of apple turning brown\nbleaching clothes",
    "choices":[
      "Both are chemical changes.",
      "Both are only physical changes.",
      "Both are caused by cooling.",
      "Both are caused by heating."
    ],
    "answer":0,
    "hint":null,
    "image":null,
    "task":"closed-choice",
    "grade":"grade7",
    "subject":"natural science",
    "topic":"chemistry",
    "category":"Chemical reactions",
    "skill":"Compare physical and chemical changes",
    "lecture":"Matter is made of very small particles called atoms. Atoms can be linked together by chemical bonds. When two or more atoms link together, they form a molecule. In a chemical change, the chemical bonds in the molecules break. The atoms then link together to form different molecules. The types of molecules in matter before and after a chemical change are always different. Some chemical changes are caused by heating or cooling. For example, burning a piece of paper is a chemical change caused by heating. As paper burns, paper molecules react with oxygen molecules in the air. This reaction breaks the chemical bonds in the molecules. The atoms then link together in a different way to form different molecules. For example, carbon dioxide molecules are formed when paper burns. In a physical change, chemical bonds do not break. The types of molecules in matter before and after a physical change are always the same. A change of state is a type of physical change. Changes of state can be caused by heating or cooling. For example, water vaporizing is a physical change that can be caused by heating. Liquid water and water vapor are made of the same type of matter: water. The law of conservation of mass says that all physical and chemical changes conserve mass. Conserve means to keep the same. So, the total mass before a physical or chemical change is equal to the total mass after the change.",
    "solution":"Step 1: Think about each change.\nA piece of apple turning brown is a chemical change. The apple reacts with oxygen in the air and turns into a different type of matter.\nIf you scrape off the brown layer of the apple, the inside is still white. The inside hasn't touched the air. So the chemical change didn't happen to that part of the apple.\nBleaching clothes is a chemical change. The bleach reacts with dark stains on the clothes. The reaction changes the stains into different types of matter that wash away easily.\nStep 2: Look at each answer choice.\nBoth are only physical changes.\nBoth changes are chemical changes. They are not physical changes.\nBoth are chemical changes.\nBoth changes are chemical changes. The type of matter before and after each change is different.\nBoth are caused by heating.\nNeither change is caused by heating.\nBoth are caused by cooling.\nNeither change is caused by cooling.",
    "split":"val",
    "path":null
  },
  {
    "question":"Suppose Jayden decides to take a trip to Nevada. Which result would be a cost?",
    "choices":[
      "Jayden will enjoy his trip to Nevada more than he would have enjoyed a trip to Connecticut.",
      "Jayden will spend more money. Plane tickets for Jayden to get to Nevada are more expensive than tickets to Connecticut."
    ],
    "answer":1,
    "hint":"Jayden is deciding whether to take a trip to Nevada or Connecticut. He wants to enjoy his trip. But he is also trying to save money.",
    "image":null,
    "task":"closed-choice",
    "grade":"grade4",
    "subject":"social science",
    "topic":"economics",
    "category":"Basic economic principles",
    "skill":"Costs and benefits",
    "lecture":"Before you decide to do something, it is often helpful to list costs and benefits. Costs are what you give up or spend when you decide to do something. Costs involve giving up things that you want or need. Benefits are what you gain or save when you decide to do something. Benefits involve gaining something that you want or need.",
    "solution":"This result is a cost. It involves giving up or spending something that Jayden wants or needs:\nJayden will spend more money. Plane tickets for Jayden to get to Nevada are more expensive than tickets to Connecticut.",
    "split":"val",
    "path":null
  },
  {
    "question":"Which better describes the Kibale National Forest ecosystem?",
    "choices":[
      "It has year-round rain. It also has many different types of organisms.",
      "It has cold winters. It also has soil that is rich in nutrients."
    ],
    "answer":0,
    "hint":"Figure: Kibale National Forest.\nKibale National Forest is a tropical rain forest ecosystem in Uganda, a country in eastern Africa.",
    "image":"image.png",
    "task":"closed-choice",
    "grade":"grade3",
    "subject":"natural science",
    "topic":"biology",
    "category":"Ecosystems",
    "skill":"Describe ecosystems",
    "lecture":"An ecosystem is formed when living and nonliving things interact in an environment. There are many types of ecosystems. Here are some ways in which ecosystems can differ from each other: the pattern of weather, or climate the type of soil or water the organisms that live there",
    "solution":"A tropical rain forest is a type of ecosystem. Tropical rain forests have the following features: year-round rain and warm temperatures, soil that is poor in nutrients, and many different types of organisms. So, Kibale National Forest has year-round rain. It also has many different types of organisms.",
    "split":"val",
    "path":"https:\/\/scienceqa-webdemo.s3.us-west-1.amazonaws.com\/extra\/626\/image.png"
  },
  {
    "question":"How long is a hammer?",
    "choices":[
      "24 centimeters",
      "24 meters",
      "24 millimeters",
      "24 kilometers"
    ],
    "answer":0,
    "hint":"Select the best estimate.",
    "image":null,
    "task":"closed-choice",
    "grade":"grade7",
    "subject":"natural science",
    "topic":"units-and-measurement",
    "category":"Units and measurement",
    "skill":"Choose metric units of distance, mass, and volume",
    "lecture":"Measurements are written with both a number and a unit. The unit comes after the number. The unit shows what the number means. When you are using metric units, length can be written with units of millimeters, centimeters, meters, or kilometers. One meter contains 100 centimeters or 1,000 millimeters. So, 1 meter is larger than 1 centimeter, and 1 centimeter is larger than 1 millimeter. The tip of the pencil shown here is only 1 millimeter wide, but the pencil is about 16 centimeters long. A red fox is about 1 meter long. The Sydney Harbour Bridge in Australia is about 1,000 meters, or 1 kilometer, in length.",
    "solution":"The best estimate for the length of a hammer is 24 centimeters.\n24 millimeters is too short. 24 meters and 24 kilometers are too long.",
    "split":"val",
    "path":null
  },
  {
    "question":"Select the amphibian below.",
    "choices":[
      "golden frog",
      "bison"
    ],
    "answer":0,
    "hint":"Amphibians have moist skin and begin their lives in water. A red-eyed tree frog is an example of an amphibian.",
    "image":"image.png",
    "task":"closed-choice",
    "grade":"grade2",
    "subject":"natural science",
    "topic":"biology",
    "category":"Classification",
    "skill":"Identify mammals, birds, fish, reptiles, and amphibians",
    "lecture":"Birds, mammals, fish, reptiles, and amphibians are groups of animals. The animals in each group have traits in common. Scientists sort animals into groups based on traits they have in common. This process is called classification.",
    "solution":"A golden frog is an amphibian. It has moist skin and begins its life in water.\nA bison is a mammal. It has fur and feeds its young milk.",
    "split":"val",
    "path":"https:\/\/scienceqa-webdemo.s3.us-west-1.amazonaws.com\/extra\/656\/image.png"
  },
  {
    "question":"Assume all other forces on Kylie are balanced. Which statement describes the forces on Kylie?",
    "choices":[
      "The forces are balanced, so there is no net force on Kylie.",
      "The forces are unbalanced, so there is a net force on Kylie."
    ],
    "answer":1,
    "hint":"Kylie is sitting on a roller coaster cart as it reaches the bottom of a big loop. Earth's gravity is pulling down on Kylie with a force of 600N. The seat of the cart is pushing up on Kylie with a force of 1,200N.",
    "image":null,
    "task":"closed-choice",
    "grade":"grade6",
    "subject":"natural science",
    "topic":"physics",
    "category":"Velocity, acceleration, and forces",
    "skill":"Balanced and unbalanced forces",
    "lecture":"A force is a push or a pull that acts on an object. Every force has a direction and a magnitude, or strength. If two forces act on an object in opposite directions, the forces are called opposing forces. When opposing forces have the same magnitude, they are balanced. If all the forces on an object are balanced, there is no net force on the object. When opposing forces have different magnitudes, the forces are unbalanced. If any forces on an object are unbalanced, there is a net force on the object.",
    "solution":"To determine if there is a net force on Kylie, look at the forces:\nEarth's gravity is pulling Kylie down with a force of 600 N.\nThe seat of the cart is pushing Kylie up with a force of 1,200 N.\nThe forces are in opposite directions, and the forces have different magnitudes: 600 N and 1,200 N. This means that the forces are unbalanced, so there is a net force on Kylie.",
    "split":"val",
    "path":null
  },
  {
    "question":"Think about the magnetic force between the magnets in each pair. Which of the following statements is true?",
    "choices":[
      "The magnetic force is weaker in Pair 2.",
      "The strength of the magnetic force is the same in both pairs.",
      "The magnetic force is weaker in Pair 1."
    ],
    "answer":2,
    "hint":"The images below show two pairs of magnets. The magnets in different pairs do not affect each other. All the magnets shown are made of the same material.",
    "image":"image.png",
    "task":"closed-choice",
    "grade":"grade3",
    "subject":"natural science",
    "topic":"physics",
    "category":"Magnets",
    "skill":"Compare strengths of magnetic forces",
    "lecture":"Magnets can pull or push on each other without touching. When magnets attract, they pull together. When magnets repel, they push apart. These pulls and pushes between magnets are called magnetic forces. The stronger the magnetic force between two magnets, the more strongly the magnets attract or repel each other. You can change the strength of a magnetic force between two magnets by changing the distance between them. The magnetic force is weaker when the magnets are farther apart.",
    "solution":"Distance affects the strength of the magnetic force. When magnets are farther apart, the magnetic force between them is weaker.\nThe magnets in Pair 1 are farther apart than the magnets in Pair 2. So, the magnetic force is weaker in Pair 1 than in Pair 2.",
    "split":"val",
    "path":"https:\/\/scienceqa-webdemo.s3.us-west-1.amazonaws.com\/extra\/662\/image.png"
  },
  {
    "question":"Think about the magnetic force between the magnets in each pair. Which of the following statements is true?",
    "choices":[
      "The strength of the magnetic force is the same in both pairs.",
      "The magnetic force is weaker in Pair 1.",
      "The magnetic force is weaker in Pair 2."
    ],
    "answer":0,
    "hint":"The images below show two pairs of magnets. The magnets in different pairs do not affect each other. All the magnets shown are made of the same material.",
    "image":"image.png",
    "task":"closed-choice",
    "grade":"grade4",
    "subject":"natural science",
    "topic":"physics",
    "category":"Magnets",
    "skill":"Compare strengths of magnetic forces",
    "lecture":"Magnets can pull or push on each other without touching. When magnets attract, they pull together. When magnets repel, they push apart. These pulls and pushes between magnets are called magnetic forces. The stronger the magnetic force between two magnets, the more strongly the magnets attract or repel each other.",
    "solution":"Distance affects the strength of the magnetic force. But the distance between the magnets in Pair 1 and in Pair 2 is the same.\nSo, the strength of the magnetic force is the same in both pairs.",
    "split":"val",
    "path":"https:\/\/scienceqa-webdemo.s3.us-west-1.amazonaws.com\/extra\/664\/image.png"
  },
  {
    "question":"Select the one substance that is not a mineral.",
    "choices":[
      "Graphite is formed in nature. It is a pure substance.",
      "A brick is made by humans. It is not a pure substance.",
      "Quartz is formed in nature. It is a pure substance."
    ],
    "answer":1,
    "hint":null,
    "image":null,
    "task":"closed-choice",
    "grade":"grade4",
    "subject":"natural science",
    "topic":"earth-science",
    "category":"Rocks and minerals",
    "skill":"Identify minerals using properties",
    "lecture":"Minerals are the building blocks of rocks. A rock can be made of one or more minerals. Minerals and rocks have the following properties: <br\/><br\/> Property | Mineral | Rock<br\/> It is a solid. | Yes | Yes<br\/> It is formed in nature. | Yes | Yes<br\/> It is not made by organisms. | Yes | Yes<br\/> It is a pure substance. | Yes | No<br\/> It has a fixed crystal structure. | Yes | No<br\/> <br\/> You can use these properties to tell whether a substance is a mineral, a rock, or neither. Look closely at the last three properties: Minerals and rocks are not made by organisms. Organisms make their own body parts. For example, snails and clams make their shells. Because they are made by organisms, body parts cannot be  minerals or rocks. Humans are organisms too. So, substances that humans make by hand or in factories are not minerals or rocks. A mineral is a pure substance, but a rock is not. A pure substance is made of only one type of matter.  Minerals are pure substances, but rocks are not. Instead, all rocks are mixtures. A mineral has a fixed crystal structure, but a rock does not. The crystal structure of a substance tells you how the atoms or molecules in the substance are arranged. Different types of minerals have different crystal structures, but all minerals have a fixed crystal structure. This means that the atoms and molecules in different pieces of the same type of mineral are always arranged the same way. However, rocks do not have a fixed crystal structure. So, the arrangement of atoms or molecules in different pieces of the same type of rock may be different!",
    "solution":"Compare the properties of each substance to the properties of minerals. Select the substance whose properties do not match those of minerals.\nA brick is made by humans. But minerals are not made by living things.\nA brick is not a pure substance. But all minerals are pure substances.\nSo, a brick is not a mineral.\nQuartz is a mineral.\nGraphite is a mineral.",
    "split":"val",
    "path":null
  },
  {
    "question":"How long is a bike path?",
    "choices":[
      "3 centimeters",
      "3 kilometers"
    ],
    "answer":1,
    "hint":"Select the better estimate.",
    "image":null,
    "task":"closed-choice",
    "grade":"grade3",
    "subject":"natural science",
    "topic":"units-and-measurement",
    "category":"Units and measurement",
    "skill":"Choose metric units of distance",
    "lecture":"Measurements are written with both a number and a unit. The unit comes after the number. The unit shows what the number means. Imagine being told that a pencil is 16 long. You might be thinking, 16 what? Is the pencil 16 centimeters long? 16 meters? 16 kilometers? The number 16 on its own does not give you much information about the length of the pencil. That is because the units are missing. Now look at the drawing of the pencil and the ruler. The ruler shows that the units are centimeters. So, the length of the pencil is 16 centimeters. There are 100 centimeters in 1 meter. So, 1 centimeter is much shorter than 1 meter. There are 1,000 meters in 1 kilometer. So, 1 meter is much shorter than 1 kilometer.",
    "solution":"The better estimate for the length of a bike path is 3 kilometers.\n3 centimeters is too short.",
    "split":"val",
    "path":null
  },
  {
    "question":"What is the capital of Alaska?",
    "choices":[
      "Tallahassee",
      "Fairbanks",
      "Anchorage",
      "Juneau"
    ],
    "answer":3,
    "hint":null,
    "image":"image.png",
    "task":"closed-choice",
    "grade":"grade4",
    "subject":"social science",
    "topic":"geography",
    "category":"State capitals",
    "skill":"Identify state capitals of the West",
    "lecture":null,
    "solution":"Juneau is the capital of Alaska.",
    "split":"val",
    "path":"https:\/\/scienceqa-webdemo.s3.us-west-1.amazonaws.com\/extra\/687\/image.png"
  },
  {
    "question":"What is the capital of Arizona?",
    "choices":[
      "Juneau",
      "Phoenix",
      "Reno",
      "Tucson"
    ],
    "answer":1,
    "hint":null,
    "image":"image.png",
    "task":"closed-choice",
    "grade":"grade3",
    "subject":"social science",
    "topic":"geography",
    "category":"State capitals",
    "skill":"Identify state capitals of the West",
    "lecture":null,
    "solution":"Phoenix is the capital of Arizona.",
    "split":"val",
    "path":"https:\/\/scienceqa-webdemo.s3.us-west-1.amazonaws.com\/extra\/690\/image.png"
  },
  {
    "question":"What is the capital of Colorado?",
    "choices":[
      "Boulder",
      "Denver",
      "Cheyenne",
      "Boise"
    ],
    "answer":1,
    "hint":null,
    "image":"image.png",
    "task":"closed-choice",
    "grade":"grade4",
    "subject":"social science",
    "topic":"geography",
    "category":"State capitals",
    "skill":"Identify state capitals of the West",
    "lecture":null,
    "solution":"Denver is the capital of Colorado.",
    "split":"val",
    "path":"https:\/\/scienceqa-webdemo.s3.us-west-1.amazonaws.com\/extra\/698\/image.png"
  },
  {
    "question":"Compare the motion of three speedboats. Which speedboat was moving at the lowest speed?",
    "choices":[
      "a speedboat that moved 890kilometers west in 10hours",
      "a speedboat that moved 880kilometers north in 10hours",
      "a speedboat that moved 360kilometers west in 10hours"
    ],
    "answer":2,
    "hint":null,
    "image":null,
    "task":"closed-choice",
    "grade":"grade3",
    "subject":"natural science",
    "topic":"physics",
    "category":"Force and motion",
    "skill":"Compare the speeds of moving objects",
    "lecture":"An object's speed tells you how fast the object is moving. Speed depends on both distance and time. Distance tells you how far the object has moved. One unit used to measure distance is the kilometer. Time tells you how long the object has spent moving. One unit used to measure time is the hour. Think about objects moving for the same amount of time. The object that is moving the slowest will go the shortest distance in that time. It is moving at the lowest speed.",
    "solution":"Look at the distance each speedboat moved and the time it took to move that distance. The direction each speedboat moved does not affect its speed.\nNotice that each speedboat moved for 10 hours. The speedboat that moved 360 kilometers moved the shortest distance in that time. So, that speedboat must have moved at the lowest speed.",
    "split":"val",
    "path":null
  },
  {
    "question":"Which property do these three objects have in common?",
    "choices":[
      "bouncy",
      "fuzzy",
      "sweet"
    ],
    "answer":2,
    "hint":"Select the best answer.",
    "image":"image.png",
    "task":"closed-choice",
    "grade":"grade4",
    "subject":"natural science",
    "topic":"physics",
    "category":"Materials",
    "skill":"Compare properties of objects",
    "lecture":"An object has different properties. A property of an object can tell you how it looks, feels, tastes, or smells. Properties can also tell you how an object will behave when something happens to it. Different objects can have properties in common. You can use these properties to put objects into groups. Grouping objects by their properties is called classification.",
    "solution":"Look at each object.\nFor each object, decide if it has that property.\nSugar has a sweet taste. All three objects are sweet.\nA fuzzy object is covered in soft hair. The chocolate bar and the candy sprinkles are not fuzzy.\nA bouncy object will bounce back from the floor if you drop it. The chocolate bar is not bouncy.\nThe property that all three objects have in common is sweet.",
    "split":"val",
    "path":"https:\/\/scienceqa-webdemo.s3.us-west-1.amazonaws.com\/extra\/704\/image.png"
  },
  {
    "question":"Is malachite a mineral?",
    "choices":[
      "yes",
      "no"
    ],
    "answer":0,
    "hint":"Malachite has the following properties:\npure substance\nsolid\nnaturally occurring\nfixed crystal structure\nnot made by living things",
    "image":"image.png",
    "task":"yes-or-no",
    "grade":"grade6",
    "subject":"natural science",
    "topic":"earth-science",
    "category":"Rocks and minerals",
    "skill":"Identify rocks and minerals",
    "lecture":"Properties are used to identify different substances. Minerals have the following properties: It is a solid. It is formed in nature. It is not made by organisms. It is a pure substance. It has a fixed crystal structure. If a substance has all five of these properties, then it is a mineral. Look closely at the last three properties: A mineral is not made by organisms. Organisms make their own body parts. For example, snails and clams make their shells. Because they are made by organisms, body parts cannot be minerals. Humans are organisms too. So, substances that humans make by hand or in factories cannot be minerals. A mineral is a pure substance. A pure substance is made of only one type of matter. All minerals are pure substances. A mineral has a fixed crystal structure. The crystal structure of a substance tells you how the atoms or molecules in the substance are arranged. Different types of minerals have different crystal structures, but all minerals have a fixed crystal structure. This means that the atoms or molecules in different pieces of the same type of mineral are always arranged the same way.",
    "solution":"Malachite has all the properties of a mineral. So, malachite is a mineral.",
    "split":"val",
    "path":"https:\/\/scienceqa-webdemo.s3.us-west-1.amazonaws.com\/extra\/711\/image.png"
  },
  {
    "question":"Is the following statement about our solar system true or false?\n75% of the planets are made mainly of rock.",
    "choices":[
      "false",
      "true"
    ],
    "answer":0,
    "hint":"Use the data to answer the question below.",
    "image":"image.png",
    "task":"true-or-false",
    "grade":"grade6",
    "subject":"natural science",
    "topic":"earth-science",
    "category":"Astronomy",
    "skill":"Analyze data to compare properties of planets",
    "lecture":"A planet's volume tells you the size of the planet. The primary composition of a planet is what the planet is made mainly of. In our solar system, planets are made mainly of rock, gas, or ice.",
    "solution":"The table tells you that four out of the eight planets are made mainly of rock. So, one-half, or 50%, of the planets are made mainly of rock.",
    "split":"val",
    "path":"https:\/\/scienceqa-webdemo.s3.us-west-1.amazonaws.com\/extra\/716\/image.png"
  },
  {
    "question":"Is the following trait inherited or acquired?\nRegan has naturally dark skin.",
    "choices":[
      "acquired",
      "inherited"
    ],
    "answer":1,
    "hint":null,
    "image":null,
    "task":"closed-choice",
    "grade":"grade5",
    "subject":"natural science",
    "topic":"biology",
    "category":"Traits and heredity",
    "skill":"Identify inherited and acquired traits",
    "lecture":"Organisms, including people, have both inherited and acquired traits. Inherited and acquired traits are gained in different ways. Inherited traits are passed down through families. Children gain these traits from their parents. Inherited traits do not need to be learned. Acquired traits are gained during a person's life. Some acquired traits, such as riding a bicycle, are gained by learning. Other acquired traits, such as scars, are caused by the environment. Children do not inherit their parents' acquired traits.",
    "solution":"Humans do not choose their skin color. Babies get their skin color from their parents. So, Regan's skin color is an inherited trait.",
    "split":"val",
    "path":null
  },
  {
    "question":"How long is a leather belt?",
    "choices":[
      "75 centimeters",
      "75 meters"
    ],
    "answer":0,
    "hint":"Select the better estimate.",
    "image":null,
    "task":"closed-choice",
    "grade":"grade2",
    "subject":"natural science",
    "topic":"units-and-measurement",
    "category":"Units and measurement",
    "skill":"Choose metric units of distance",
    "lecture":"Measurements are written with both a number and a unit. The unit comes after the number. The unit shows what the number means. Imagine being told that a pencil is 16 long. You might be thinking, 16 what? Is the pencil 16 centimeters long? 16 meters? 16 kilometers? The number 16 on its own does not give you much information about the length of the pencil. That is because the units are missing. Now look at the drawing of the pencil and the ruler. The ruler shows that the units are centimeters. So, the length of the pencil is 16 centimeters. There are 100 centimeters in 1 meter. So, 1 centimeter is much shorter than 1 meter. There are 1,000 meters in 1 kilometer. So, 1 meter is much shorter than 1 kilometer.",
    "solution":"The better estimate for the length of a leather belt is 75 centimeters.\n75 meters is too long.",
    "split":"val",
    "path":null
  },
  {
    "question":"What do these two changes have in common?\nmelting glass\ncooking an egg",
    "choices":[
      "Both are only physical changes.",
      "Both are caused by heating.",
      "Both are chemical changes.",
      "Both are caused by cooling."
    ],
    "answer":1,
    "hint":null,
    "image":null,
    "task":"closed-choice",
    "grade":"grade8",
    "subject":"natural science",
    "topic":"chemistry",
    "category":"Chemical reactions",
    "skill":"Compare physical and chemical changes",
    "lecture":"Matter is made of very small particles called atoms. Atoms can be linked together by chemical bonds. When two or more atoms link together, they form a molecule. In a chemical change, the chemical bonds in the molecules break. The atoms then link together to form different molecules. The types of molecules in matter before and after a chemical change are always different. Some chemical changes are caused by heating or cooling. For example, burning a piece of paper is a chemical change caused by heating. As paper burns, paper molecules react with oxygen molecules in the air. This reaction breaks the chemical bonds in the molecules. The atoms then link together in a different way to form different molecules. For example, carbon dioxide molecules are formed when paper burns. In a physical change, chemical bonds do not break. The types of molecules in matter before and after a physical change are always the same. A change of state is a type of physical change. Changes of state can be caused by heating or cooling. For example, water vaporizing is a physical change that can be caused by heating. Liquid water and water vapor are made of the same type of matter: water. The law of conservation of mass says that all physical and chemical changes conserve mass. Conserve means to keep the same. So, the total mass before a physical or chemical change is equal to the total mass after the change.",
    "solution":"Step 1: Think about each change.\nMelting glass is a change of state. So, it is a physical change. The glass changes from solid to liquid. But a different type of matter is not formed.\nCooking an egg is a chemical change. The heat causes the matter in the egg to change. Cooked egg and raw egg are different types of matter.\nStep 2: Look at each answer choice.\nBoth are only physical changes.\nMelting glass is a physical change. But cooking an egg is not.\nBoth are chemical changes.\nCooking an egg is a chemical change. But melting glass is not.\nBoth are caused by heating.\nBoth changes are caused by heating.\nBoth are caused by cooling.\nNeither change is caused by cooling.",
    "split":"val",
    "path":null
  },
  {
    "question":"Which property do these three objects have in common?",
    "choices":[
      "opaque",
      "stretchy",
      "fragile"
    ],
    "answer":0,
    "hint":"Select the best answer.",
    "image":"image.png",
    "task":"closed-choice",
    "grade":"grade3",
    "subject":"natural science",
    "topic":"physics",
    "category":"Materials",
    "skill":"Compare properties of objects",
    "lecture":"An object has different properties. A property of an object can tell you how it looks, feels, tastes, or smells. Properties can also tell you how an object will behave when something happens to it. Different objects can have properties in common. You can use these properties to put objects into groups.",
    "solution":"Look at each object.\nFor each object, decide if it has that property.\nA fragile object will break into pieces if you drop it. The steel beam and the towel are not fragile.\nA stretchy object gets longer when you pull on it. The steel beam and the popcorn are not stretchy.\nAn opaque object does not let light through. All three objects are opaque.\nThe property that all three objects have in common is opaque.",
    "split":"val",
    "path":"https:\/\/scienceqa-webdemo.s3.us-west-1.amazonaws.com\/extra\/725\/image.png"
  },
  {
    "question":"How long is a leather belt?",
    "choices":[
      "70 kilometers",
      "70 meters",
      "70 centimeters"
    ],
    "answer":2,
    "hint":"Select the best estimate.",
    "image":null,
    "task":"closed-choice",
    "grade":"grade4",
    "subject":"natural science",
    "topic":"units-and-measurement",
    "category":"Units and measurement",
    "skill":"Choose metric units of distance",
    "lecture":"Measurements are written with both a number and a unit. The unit comes after the number. The unit shows what the number means. When you are using metric units, length can be written with units of millimeters, centimeters, meters, or kilometers. One meter contains 100 centimeters or 1,000 millimeters. So, 1 meter is larger than 1 centimeter, and 1 centimeter is larger than 1 millimeter. The tip of the pencil shown here is only 1 millimeter wide, but the pencil is about 16 centimeters long. A red fox is about 1 meter long. The Sydney Harbour Bridge in Australia is about 1,000 meters, or 1 kilometer, in length.",
    "solution":"The best estimate for the length of a leather belt is 70 centimeters.\n70 meters and 70 kilometers are both too long.",
    "split":"val",
    "path":null
  },
  {
    "question":"Does this passage describe the weather or the climate?",
    "choices":[
      "climate",
      "weather"
    ],
    "answer":0,
    "hint":"Figure: Uganda.\nUganda is an African country near the equator. It has large forests which are humid during April and May each year.\nHint: Weather is what the atmosphere is like at a certain place and time. Climate is the pattern of weather in a certain place.",
    "image":"image.png",
    "task":"closed-choice",
    "grade":"grade6",
    "subject":"natural science",
    "topic":"earth-science",
    "category":"Weather and climate",
    "skill":"Weather and climate around the world",
    "lecture":"The atmosphere is the layer of air that surrounds Earth. Both weather and climate tell you about the atmosphere. Weather is what the atmosphere is like at a certain place and time. Weather can change quickly. For example, the temperature outside your house might get higher throughout the day. Climate is the pattern of weather in a certain place. For example, summer temperatures in New York are usually higher than winter temperatures.",
    "solution":"Read the passage carefully.\nUganda is an African country near the equator. It has large forests which are humid during April and May each year.\nThe underlined part of the passage tells you about the usual pattern of humidity in Uganda. This passage does not describe what the weather is like on a particular day. So, this passage describes the climate.",
    "split":"val",
    "path":"https:\/\/scienceqa-webdemo.s3.us-west-1.amazonaws.com\/extra\/737\/image.png"
  },
  {
    "question":"What is the mass of a goat?",
    "choices":[
      "75 ounces",
      "75 pounds",
      "75 tons"
    ],
    "answer":1,
    "hint":"Select the best estimate.",
    "image":null,
    "task":"closed-choice",
    "grade":"grade4",
    "subject":"natural science",
    "topic":"units-and-measurement",
    "category":"Units and measurement",
    "skill":"Choose customary units of mass",
    "lecture":"Measurements are written with both a number and a unit. The unit comes after the number. The unit shows what the number means. Mass is a measurement of how much matter something contains. There are many different units of mass. When you are using customary units, mass may be written with units of ounces, pounds, or tons. There are 16 ounces in 1 pound and 2,000 pounds in 1 ton. So, 1 ounce is less than 1 pound and much less than 1 ton. A slice of bread has a mass of about 1 ounce, while a can of beans has a mass of about 1 pound. A small car has a mass of about 1 ton.",
    "solution":"The best estimate for the mass of a goat is 75 pounds.\n75 ounces is too light and 75 tons is too heavy.",
    "split":"val",
    "path":null
  },
  {
    "question":"Which text uses the word unique in its traditional sense?",
    "choices":[
      "The Supreme Court case Miranda v. Arizona, which led to the institution of the Miranda warning, was quite unique in that it had significant implications for law enforcement. Only a handful of Supreme Court decisions have had such an impact on daily police procedure.",
      "The Miranda warning, the reading of rights given to a suspect by police prior to questioning, is not unique to the United States; a number of other countries have equivalent rights, including Australia, South Africa, Switzerland, Thailand, and Kazakhstan."
    ],
    "answer":1,
    "hint":null,
    "image":null,
    "task":"closed-choice",
    "grade":"grade9",
    "subject":"language science",
    "topic":"writing-strategies",
    "category":"Word usage and nuance",
    "skill":"Explore words with new or contested usages",
    "lecture":"Words change in meaning when speakers begin using them in new ways. For example, the word peruse once only meant to examine in detail, but it's now also commonly used to mean to look through in a casual manner. When a word changes in meaning, its correct usage is often debated. Although a newer sense of the word may be more commonly used, many people consider a word's traditional definition to be the correct usage. Being able to distinguish the different uses of a word can help you use it appropriately for different audiences. Britney perused her notes, carefully preparing for her exam. The traditional usage above is considered more standard. David perused the magazine, absentmindedly flipping through the pages. The nontraditional usage above is now commonly used, but traditional style guides generally advise against it.",
    "solution":"The second text uses unique in its traditional sense: being the only one of its kind.\nThe Miranda warning, the reading of rights given to a suspect by police prior to questioning, is not unique to the United States; a number of other countries have equivalent rights, including Australia, South Africa, Switzerland, Thailand, and Kazakhstan.\nThe first text uses unique in its nontraditional sense: interesting or unusual. Miranda v. Arizona was one of a few Supreme Court cases to have implications for law enforcement, so it was not one of a kind in that respect. It may be helpful to remember that if unique is modified by an adverb\u2014as in most unique, very unique, or quite unique\u2014it is probably being used nontraditionally.\nThe Supreme Court case Miranda v. Arizona, which led to the institution of the Miranda warning, was quite unique in that it had significant implications for law enforcement. Only a handful of Supreme Court decisions have had such an impact on daily police procedure.\nMost style guides recommend to use the traditional sense of the word unique because it is considered more standard.",
    "split":"val",
    "path":null
  },
  {
    "question":"Which solution has a higher concentration of yellow particles?",
    "choices":[
      "Solution A",
      "Solution B",
      "neither; their concentrations are the same"
    ],
    "answer":1,
    "hint":"The diagram below is a model of two solutions. Each yellow ball represents one particle of solute.",
    "image":"image.png",
    "task":"closed-choice",
    "grade":"grade8",
    "subject":"natural science",
    "topic":"chemistry",
    "category":"Solutions",
    "skill":"Compare concentrations of solutions",
    "lecture":"A solution is made up of two or more substances that are completely mixed. In a solution, solute particles are mixed into a solvent. The solute cannot be separated from the solvent by a filter. For example, if you stir a spoonful of salt into a cup of water, the salt will mix into the water to make a saltwater solution. In this case, the salt is the solute. The water is the solvent. The concentration of a solute in a solution is a measure of the ratio of solute to solvent. Concentration can be described in terms of particles of solute per volume of solvent. concentration = particles of solute \/ volume of solvent",
    "solution":"In Solution A and Solution B, the yellow particles represent the solute. To figure out which solution has a higher concentration of yellow particles, look at both the number of yellow particles and the volume of the solvent in each container.\nUse the concentration formula to find the number of yellow particles per milliliter.\nSolution B has more yellow particles per milliliter. So, Solution B has a higher concentration of yellow particles.",
    "split":"val",
    "path":"https:\/\/scienceqa-webdemo.s3.us-west-1.amazonaws.com\/extra\/744\/image.png"
  },
  {
    "question":"Which of these states is farthest west?",
    "choices":[
      "Georgia",
      "Mississippi",
      "Maine",
      "Vermont"
    ],
    "answer":1,
    "hint":null,
    "image":"image.png",
    "task":"closed-choice",
    "grade":"grade2",
    "subject":"social science",
    "topic":"geography",
    "category":"Geography",
    "skill":"Read a map: cardinal directions",
    "lecture":"Maps have four cardinal directions, or main directions. Those directions are north, south, east, and west. A compass rose is a set of arrows that point to the cardinal directions. A compass rose usually shows only the first letter of each cardinal direction. The north arrow points to the North Pole. On most maps, north is at the top of the map.",
    "solution":"To find the answer, look at the compass rose. Look at which way the west arrow is pointing. Mississippi is farthest west.",
    "split":"val",
    "path":"https:\/\/scienceqa-webdemo.s3.us-west-1.amazonaws.com\/extra\/745\/image.png"
  },
  {
    "question":"Complete the sentence so that it uses personification.\nThe midday sun () the hikers.",
    "choices":[
      "glared at",
      "warmed"
    ],
    "answer":0,
    "hint":null,
    "image":null,
    "task":"closed-choice",
    "grade":"grade10",
    "subject":"language science",
    "topic":"writing-strategies",
    "category":"Creative techniques",
    "skill":"Use personification",
    "lecture":"Personification is giving human characteristics to nonhuman things. It is a figure of speech that can be used to make writing more interesting or to emphasize a point. The trees danced in the wind. The word danced describes the trees as if they were people. Unlike people, however, trees can't actually dance. Instead, the personification suggests that the trees are moving.",
    "solution":"Complete the sentence with the phrase glared at. It describes the sun as if it were a person giving an angry look.",
    "split":"val",
    "path":null
  },
  {
    "question":"Which of the following contains a vague pronoun reference?",
    "choices":[
      "Bob had to stay home with his brother because he wasn't feeling well.",
      "Bob's brother wasn't feeling well, so Bob had to stay home with him."
    ],
    "answer":0,
    "hint":null,
    "image":null,
    "task":"closed-choice",
    "grade":"grade11",
    "subject":"language science",
    "topic":"writing-strategies",
    "category":"Pronouns",
    "skill":"Identify vague pronoun references",
    "lecture":"When writing, make sure to avoid vague pronoun references. A vague pronoun reference occurs when a pronoun could refer to more than one possible antecedent. When Lisa and Kim finally landed, she breathed a sigh of relief. The pronoun she could refer to either Lisa or Kim, so the meaning of the sentence is unclear. Vague pronoun references can be corrected in one of two ways: 1. Replace the pronoun with its correct antecedent: When Lisa and Kim finally landed, Lisa breathed a sigh of relief. 2. Rewrite the sentence: Lisa breathed a sigh of relief when she and Kim finally landed. A vague pronoun reference also occurs when they, them, their, theirs, it, or its is used without its antecedent. They say that this nail polish dries in less than five minutes. The pronoun they is used without its antecedent, so the meaning of the sentence is unclear. This problem can be fixed by replacing the pronoun with its missing antecedent. The advertisements say that this nail polish dries in less than five minutes.",
    "solution":"The second answer choice contains a vague pronoun reference. The pronoun he could refer to Bob or his brother.\nBob had to stay home with his brother because he wasn't feeling well.\nThe first answer choice shows a possible correction for the vague pronoun reference. The text has been rewritten so that the meaning is clear.\nBob's brother wasn't feeling well, so Bob had to stay home with him.",
    "split":"val",
    "path":null
  },
  {
    "question":"Which tense does the sentence use?\nEllie practices the drums in her family's garage.",
    "choices":[
      "present tense",
      "past tense",
      "future tense"
    ],
    "answer":0,
    "hint":null,
    "image":null,
    "task":"closed-choice",
    "grade":"grade3",
    "subject":"language science",
    "topic":"verbs",
    "category":"Verb tense",
    "skill":"Is the sentence in the past, present, or future tense?",
    "lecture":"Present tense verbs tell you about something that is happening now. Most present-tense verbs are regular. They have no ending, or they end in -s or -es. Two verbs are irregular in the present tense, to be and to have. You must remember their forms. Past tense verbs tell you about something that has already happened. Most past-tense verbs are regular. They end in -ed. Some verbs are irregular in the past tense. You must remember their past-tense forms. Future tense verbs tell you about something that is going to happen. All future-tense verbs use the word will. <br\/><br\/> Present | Past | Future<br\/> walk, walks | walked | will walk<br\/> go, goes | went | will go<br\/>",
    "solution":"The sentence is in present tense. You can tell because it uses a present-tense verb, practices. The verb ends in -s and tells you about something that is true or happening now.",
    "split":"val",
    "path":null
  },
  {
    "question":"Which solution has a higher concentration of yellow particles?",
    "choices":[
      "neither; their concentrations are the same",
      "Solution B",
      "Solution A"
    ],
    "answer":2,
    "hint":"The diagram below is a model of two solutions. Each yellow ball represents one particle of solute.",
    "image":"image.png",
    "task":"closed-choice",
    "grade":"grade7",
    "subject":"natural science",
    "topic":"chemistry",
    "category":"Solutions",
    "skill":"Compare concentrations of solutions",
    "lecture":"A solution is made up of two or more substances that are completely mixed. In a solution, solute particles are mixed into a solvent. The solute cannot be separated from the solvent by a filter. For example, if you stir a spoonful of salt into a cup of water, the salt will mix into the water to make a saltwater solution. In this case, the salt is the solute. The water is the solvent. The concentration of a solute in a solution is a measure of the ratio of solute to solvent. Concentration can be described in terms of particles of solute per volume of solvent. concentration = particles of solute \/ volume of solvent",
    "solution":"In Solution A and Solution B, the yellow particles represent the solute. To figure out which solution has a higher concentration of yellow particles, look at both the number of yellow particles and the volume of the solvent in each container.\nUse the concentration formula to find the number of yellow particles per milliliter.\nSolution A has more yellow particles per milliliter. So, Solution A has a higher concentration of yellow particles.",
    "split":"val",
    "path":"https:\/\/scienceqa-webdemo.s3.us-west-1.amazonaws.com\/extra\/759\/image.png"
  },
  {
    "question":"Suppose Nancy decides to watch the comedy. Which result would be a cost?",
    "choices":[
      "Nancy will get to watch the movie that she is more excited about.",
      "Nancy will give up the chance to watch a movie with her sister."
    ],
    "answer":1,
    "hint":"Nancy is deciding whether to watch a comedy or an action movie. She would prefer to watch a comedy. But she also wants to watch a movie with her sister. Nancy's sister will only watch an action movie.",
    "image":null,
    "task":"closed-choice",
    "grade":"grade4",
    "subject":"social science",
    "topic":"economics",
    "category":"Basic economic principles",
    "skill":"Costs and benefits",
    "lecture":"Before you decide to do something, it is often helpful to list costs and benefits. Costs are what you give up or spend when you decide to do something. Costs involve giving up things that you want or need. Benefits are what you gain or save when you decide to do something. Benefits involve gaining something that you want or need.",
    "solution":"This result is a cost. It involves giving up or spending something that Nancy wants or needs:\nNancy will give up the chance to watch a movie with her sister.",
    "split":"val",
    "path":null
  },
  {
    "question":"What is the capital of Oregon?",
    "choices":[
      "Phoenix",
      "Sacramento",
      "Salem",
      "Frankfort"
    ],
    "answer":2,
    "hint":null,
    "image":"image.png",
    "task":"closed-choice",
    "grade":"grade5",
    "subject":"social science",
    "topic":"geography",
    "category":"State capitals",
    "skill":"Identify the 50 state capitals",
    "lecture":null,
    "solution":"Salem is the capital of Oregon.",
    "split":"val",
    "path":"https:\/\/scienceqa-webdemo.s3.us-west-1.amazonaws.com\/extra\/761\/image.png"
  },
  {
    "question":"Is the following trait inherited or acquired?\nCamilla plays basketball.",
    "choices":[
      "acquired",
      "inherited"
    ],
    "answer":0,
    "hint":"Hint: Playing basketball takes practice.",
    "image":null,
    "task":"closed-choice",
    "grade":"grade4",
    "subject":"natural science",
    "topic":"biology",
    "category":"Traits and heredity",
    "skill":"Identify inherited and acquired traits",
    "lecture":"Organisms, including people, have both inherited and acquired traits. Inherited and acquired traits are gained in different ways. Inherited traits are passed down through families. Children gain these traits from their parents. Inherited traits do not need to be learned. Acquired traits are gained during a person's life. Some acquired traits, such as riding a bicycle, are gained by learning. Other acquired traits, such as scars, are caused by the environment. Children do not inherit their parents' acquired traits.",
    "solution":"People are not born knowing how to play basketball. Instead, some people learn how to play basketball. Playing the sport takes practice. So, playing basketball is an acquired trait.",
    "split":"val",
    "path":null
  },
  {
    "question":"Using only these supplies, which question can Haley investigate with an experiment?",
    "choices":[
      "Does a cell phone charge more quickly when it is turned on or when it is turned off?",
      "Does a tablet charge faster with a two-foot-long charging cable or a five-foot-long charging cable?",
      "Does a cell phone charge faster when plugged into a wall outlet or into a computer?"
    ],
    "answer":0,
    "hint":"Haley notices that her cell phone charges more quickly sometimes and more slowly other times. She wonders what factors affect how quickly a phone charges. So, she decides to design an experiment. She has the following supplies available:\none cell phone\na two-foot-long charging cable\na five-foot-long charging cable\na stopwatch\na wall outlet",
    "image":null,
    "task":"closed-choice",
    "grade":"grade8",
    "subject":"natural science",
    "topic":"science-and-engineering-practices",
    "category":"Designing experiments",
    "skill":"Identify questions that can be investigated with a set of materials",
    "lecture":"Experiments can be designed to answer specific questions. When designing an experiment, you must identify the supplies that are necessary to answer your question. In order to do this, you need to figure out what will be tested and what will be measured during the experiment. Imagine that you are wondering if plants grow to different heights when planted in different types of soil. How might you decide what supplies are necessary to conduct this experiment? First, you need to identify the part of the experiment that will be tested, which is the independent variable. This is usually the part of the experiment that is different or changed. In this case, you would like to know how plants grow in different types of soil. So, you must have different types of soil available. Next, you need to identify the part of the experiment that will be measured or observed, which is the dependent variable. In this experiment, you would like to know if some plants grow taller than others. So, you must be able to compare the plants' heights. To do this, you can observe which plants are taller by looking at them, or you can measure their exact heights with a meterstick. So, if you have different types of soil and can observe or measure the heights of your plants, then you have the supplies you need to investigate your question with an experiment!",
    "solution":null,
    "split":"val",
    "path":null
  },
  {
    "question":"What is the source of the allusion in the sentence below?\nClara told her friends that Farid was a typical Peter Pan type.",
    "choices":[
      "a song",
      "literature"
    ],
    "answer":1,
    "hint":null,
    "image":null,
    "task":"closed-choice",
    "grade":"grade7",
    "subject":"language science",
    "topic":"figurative-language",
    "category":"Literary devices",
    "skill":"Recall the source of an allusion",
    "lecture":"An allusion is a brief mention of something or someone well known, often from mythology, history, or literature. An allusion lets you reference ideas from an entire story in just a few words. \"I'd better get home before I turn into a pumpkin!\" Lila remarked. Here, Lila alludes to the fairy tale \"Cinderella,\" in which Cinderella must leave the ball before the coach that brought her transforms into a pumpkin. The allusion shows that Lila must depart immediately.",
    "solution":"The source of the allusion Peter Pan is literature.\nIn a J. M. Barrie novel, the character Peter Pan retreats to Neverland and refuses to grow up.\nThe allusion Peter Pan means a person who won't take on adult responsibilities.",
    "split":"val",
    "path":null
  },
  {
    "question":"Which is harder?",
    "choices":[
      "ceramic mug",
      "cotton apron"
    ],
    "answer":0,
    "hint":null,
    "image":null,
    "task":"closed-choice",
    "grade":"grade2",
    "subject":"natural science",
    "topic":"physics",
    "category":"Materials",
    "skill":"Compare properties of materials",
    "lecture":"Every object is made of one or more materials. A material is a type of matter. Wood, glass, metal, and plastic are common materials. A material has different properties. A material's properties tell you how it looks, feels, tastes, or smells.",
    "solution":"Hard is a property. A hard material keeps its shape when you press on it with your finger.\nLook at each picture, one at a time. Imagine pushing on the material shown in each picture.\nOf the choices, the ceramic mug is harder. If you press on a piece of ceramic, it will not change shape.",
    "split":"val",
    "path":null
  },
  {
    "question":"What is the capital of Oregon?",
    "choices":[
      "Portland",
      "Boston",
      "Salem",
      "Minneapolis"
    ],
    "answer":2,
    "hint":null,
    "image":"image.png",
    "task":"closed-choice",
    "grade":"grade5",
    "subject":"social science",
    "topic":"geography",
    "category":"State capitals",
    "skill":"Identify state capitals of the West",
    "lecture":null,
    "solution":"Salem is the capital of Oregon.",
    "split":"val",
    "path":"https:\/\/scienceqa-webdemo.s3.us-west-1.amazonaws.com\/extra\/779\/image.png"
  },
  {
    "question":"Which of these states is farthest north?",
    "choices":[
      "Oregon",
      "Kansas",
      "Mississippi",
      "Illinois"
    ],
    "answer":0,
    "hint":null,
    "image":"image.png",
    "task":"closed-choice",
    "grade":"grade5",
    "subject":"social science",
    "topic":"geography",
    "category":"Maps",
    "skill":"Read a map: cardinal directions",
    "lecture":"Maps have four cardinal directions, or main directions. Those directions are north, south, east, and west. A compass rose is a set of arrows that point to the cardinal directions. A compass rose usually shows only the first letter of each cardinal direction. The north arrow points to the North Pole. On most maps, north is at the top of the map.",
    "solution":"To find the answer, look at the compass rose. Look at which way the north arrow is pointing. Oregon is farthest north.",
    "split":"val",
    "path":"https:\/\/scienceqa-webdemo.s3.us-west-1.amazonaws.com\/extra\/780\/image.png"
  },
  {
    "question":"What is the volume of a water balloon?",
    "choices":[
      "485 milliliters",
      "485 liters"
    ],
    "answer":0,
    "hint":"Select the better estimate.",
    "image":null,
    "task":"closed-choice",
    "grade":"grade4",
    "subject":"natural science",
    "topic":"units-and-measurement",
    "category":"Units and measurement",
    "skill":"Choose metric units of volume",
    "lecture":"Measurements are written with both a number and a unit. The unit comes after the number. The unit shows what the number means. Volume is a measurement of how much space something takes up. There are many different units of volume. When you are using metric units, volume may be written in units of milliliters or liters. There are 1,000 milliliters in 1 liter. So, 1 milliliter is much less than 1 liter. A raindrop has a volume of about 20 milliliters, while a large soda bottle has a volume of 2 liters. The flask shown here measures volumes up to 500 milliliters.",
    "solution":"The better estimate for the volume of a water balloon is 485 milliliters.\n485 liters is too much.",
    "split":"val",
    "path":null
  },
  {
    "question":"Which correctly shows the title of a magazine?",
    "choices":[
      "Oceans of the Mind",
      "oceans of the mind"
    ],
    "answer":0,
    "hint":null,
    "image":null,
    "task":"closed-choice",
    "grade":"grade4",
    "subject":"language science",
    "topic":"capitalization",
    "category":"Formatting",
    "skill":"Capitalizing titles",
    "lecture":"In a title, capitalize the first word, the last word, and every important word in between. The Wind in the Willows James and the Giant Peach These words are not important in titles: Articles, a, an, the Short prepositions, such as at, by, for, in, of, on, to, up Coordinating conjunctions, such as and, but, or",
    "solution":"Capitalize the first word, the last word, and every important word in between. The words of and the are not important, so they should not be capitalized.\nThe correct title is Oceans of the Mind.",
    "split":"val",
    "path":null
  },
  {
    "question":"Which better describes the Kaeng Krachan National Park ecosystem?",
    "choices":[
      "It has year-round warm temperatures. It also has many different types of organisms.",
      "It has cold winters. It also has many different types of organisms."
    ],
    "answer":0,
    "hint":"Figure: Kaeng Krachan National Park.\nKaeng Krachan National Park is a tropical rain forest ecosystem in western Thailand.",
    "image":"image.png",
    "task":"closed-choice",
    "grade":"grade4",
    "subject":"natural science",
    "topic":"biology",
    "category":"Ecosystems",
    "skill":"Describe ecosystems",
    "lecture":"An environment includes all of the biotic, or living, and abiotic, or nonliving, things in an area. An ecosystem is created by the relationships that form among the biotic and abiotic parts of an environment. There are many different types of terrestrial, or land-based, ecosystems. Here are some ways in which terrestrial ecosystems can differ from each other: the pattern of weather, or climate the type of soil the organisms that live there",
    "solution":"A tropical rain forest is a type of ecosystem. Tropical rain forests have the following features: year-round rain and warm temperatures, soil that is poor in nutrients, and many different types of organisms. So, Kaeng Krachan National Park has year-round warm temperatures. It also has many different types of organisms.",
    "split":"val",
    "path":"https:\/\/scienceqa-webdemo.s3.us-west-1.amazonaws.com\/extra\/790\/image.png"
  },
  {
    "question":"Which correctly shows the title of a TV show?",
    "choices":[
      "***You Can't Do That on Television***",
      "\"You Can't Do That on Television\""
    ],
    "answer":0,
    "hint":null,
    "image":null,
    "task":"closed-choice",
    "grade":"grade6",
    "subject":"language science",
    "topic":"punctuation",
    "category":"Formatting",
    "skill":"Formatting titles",
    "lecture":"The title of a book, movie, play, TV show, magazine, or newspaper should be in italics. If you write it by hand, it can be underlined instead. A Midsummer Night's Dream The title of a poem, song, article, or short story should be in quotation marks. \"You Are My Sunshine\"",
    "solution":"A TV show should be in italics.\nThe correct title is **You Can't Do That on Television**.",
    "split":"val",
    "path":null
  },
  {
    "question":"Which animal's feet are also adapted for swimming?",
    "choices":[
      "purple gallinule",
      "lava gull"
    ],
    "answer":1,
    "hint":"Black-bellied whistling ducks live near lakes and streams in North America. They find most of their food in shallow water. The feet of the  are adapted for swimming.\nFigure: black-bellied whistling duck.",
    "image":"image.png",
    "task":"closed-choice",
    "grade":"grade3",
    "subject":"natural science",
    "topic":"biology",
    "category":"Adaptations",
    "skill":"Animal adaptations: feet and limbs",
    "lecture":"An adaptation is an inherited trait that helps an organism survive or reproduce. Adaptations can include both body parts and behaviors. The shape of an animal's feet is one example of an adaptation. Animals' feet can be adapted in different ways. For example, webbed feet might help an animal swim. Feet with thick fur might help an animal walk on cold, snowy ground.",
    "solution":"Look at the picture of the black-bellied whistling duck.\nThe black-bellied whistling duck has webbed feet. Its feet are adapted for swimming. As it swims, the black-bellied whistling duck uses its webbed feet to push itself through water.\nNow look at each animal. Figure out which animal has a similar adaptation.\nThe lava gull has webbed feet. Its feet are adapted for swimming.\nThe purple gallinule has long, thin toes on its feet. Its feet are not adapted for swimming. The purple gallinule uses its feet to walk on large leaves floating on the surface of the water.",
    "split":"val",
    "path":"https:\/\/scienceqa-webdemo.s3.us-west-1.amazonaws.com\/extra\/809\/image.png"
  },
  {
    "question":"Select the animal that does not have a backbone.",
    "choices":[
      "leaf-curling spider",
      "salmon"
    ],
    "answer":0,
    "hint":"Hint: Insects, spiders, and worms do not have backbones.",
    "image":null,
    "task":"closed-choice",
    "grade":"grade2",
    "subject":"natural science",
    "topic":"biology",
    "category":"Classification",
    "skill":"Identify animals with and without backbones",
    "lecture":"Some animals have a backbone. The backbone is made of many bones in an animal's back. An animal's backbone helps connect the different parts of its body. In the drawings below, each animal's backbone is colored orange. Other animals do not have a backbone. In fact, these animals don't have any bones! Some animals without backbones have a hard outer cover. Other animals have a soft body.",
    "solution":"Like other spiders, a leaf-curling spider does not have a backbone. It has a hard outer cover.\nA salmon is a fish. Like other fish, a salmon has a backbone.",
    "split":"val",
    "path":null
  },
  {
    "question":"Select the one animal that has all of the bird traits listed above.",
    "choices":[
      "Chinese alligators live in lakes and streams in eastern China. They lay eggs with shells and live in underground burrows in the winter. Chinese alligators have scaly, waterproof skin.",
      "Blue-footed boobies live on tropical islands in the Pacific Ocean. They have two wings, feathers, and a beak. Blue-footed boobies lay eggs with pale blue shells. They keep the eggs warm with their large blue feet."
    ],
    "answer":1,
    "hint":"Birds are a group of animals with similar traits. The following traits can be used to identify birds:\nThey have feathers.\nThey have wings.\nThey have a beak.\nThey make eggs with shells. Observe the animals and read the descriptions.",
    "image":null,
    "task":"closed-choice",
    "grade":"grade5",
    "subject":"natural science",
    "topic":"biology",
    "category":"Classification",
    "skill":"Use evidence to classify mammals, birds, fish, reptiles, and amphibians",
    "lecture":"Scientists sort animals with similar traits into groups. This is called classification. Classification helps scientists learn about how animals live. How do scientists classify animals? First, they make observations about an animal. Scientists observe the animal's traits, including its body parts and behavior. Then, scientists compare the animal's traits to other animals' traits. Scientists classify animals with similar traits into a group.",
    "solution":"To decide if an animal is part of a group, look at the traits of the group.\nBirds have the following traits:\nThey have feathers.\nThey have wings.\nThey have a beak.\nThey make eggs with shells.\nCompare each animal's traits to the group's traits. Select the animal with traits similar to the group's traits.\nA Chinese alligator has the following traits:\nIt has scaly, waterproof skin.\nIt makes eggs with shells.\nA Chinese alligator does not have all of the traits of a bird. A Chinese alligator is a reptile.\nA blue-footed booby has the following traits:\nIt has feathers.\nIt has wings.\nIt has a beak.\nIt makes eggs with shells.\nA blue-footed booby has the traits of a bird. A blue-footed booby is a bird.",
    "split":"val",
    "path":null
  },
  {
    "question":"What information supports the conclusion that Pablo acquired this trait?",
    "choices":[
      "Pablo's scar is on his left knee. His mother also has a scar on her left knee.",
      "Pablo's brother has scars on both of his knees.",
      "Pablo's scar was caused by an accident. He cut his leg when he fell off his skateboard."
    ],
    "answer":2,
    "hint":"Read the description of a trait.\nPablo has a scar on his left knee.",
    "image":null,
    "task":"closed-choice",
    "grade":"grade7",
    "subject":"natural science",
    "topic":"biology",
    "category":"Genes to traits",
    "skill":"Inherited and acquired traits: use evidence to support a statement",
    "lecture":"Organisms, including people, have both inherited and acquired traits. Inherited and acquired traits are gained in different ways. Inherited traits are passed down from biological parents to their offspring through genes. Genes are pieces of hereditary material that contain the instructions that affect inherited traits. Offspring receive their genes, and therefore gain their inherited traits, from their biological parents. Inherited traits do not need to be learned. Acquired traits are gained during a person's life. Some acquired traits, such as riding a bicycle, are gained by learning. Other acquired traits, such as scars, are caused by the environment. Parents do not pass acquired traits down to their offspring.",
    "solution":null,
    "split":"val",
    "path":null
  },
  {
    "question":"Choose the poem that uses repetition.",
    "choices":[
      "Down, down, down!\nDown to the depths of the sea!\nShe sits at her wheel in the humming town,\nSinging most joyfully.",
      "The poor old year died hard; for all the earth lay cold\nAnd bare beneath the wintry sky;\nWhile gray clouds scurried madly to the west,\nAnd hid the chill young moon from mortal sight."
    ],
    "answer":0,
    "hint":"From Matthew Arnold, \"The Forsaken Merman\" and from Alice Ruth Moore, \"New Year's Day\"",
    "image":null,
    "task":"closed-choice",
    "grade":"grade4",
    "subject":"language science",
    "topic":"reading-comprehension",
    "category":"Poetry elements",
    "skill":"Identify elements of poetry",
    "lecture":"Poetry is a special kind of writing. It has many elements that make it different from ordinary writing. Knowing these elements can help you talk about poetry, understand it better, and enjoy it more. A poem rhymes when it has a pattern of words that end in the same sound. End rhyme is when the rhymes appear at the end of a poem's lines. Little Betty Blue, Lost her holiday shoe. \u2014From Mother Goose Internal rhyme is when at least one of the rhyming words appears inside the poem's lines. Sweet dreams of pleasant streams. \u2014From William Blake, \"A Cradle Song\" Rhythm is the pattern of strong and weak syllables, or stress, in a poem. You can recognize rhythm in a poem by listening to how it sounds. Poems with regular rhythm have a beat, like in music. He watches from his mountain walls, And like a thunderbolt he falls. \u2014From Alfred, Lord Tennyson, \"The Eagle\" The syllables in bold are strong. We say them with more force than the other syllables. In this poem, every weak syllable is followed by a strong syllable. Each line sounds like da-DUM da-DUM da-DUM da-DUM. To better hear the rhythm, try reading it aloud while clapping on each strong syllable. Free verse is when a poem has neither a regular rhythm nor a rhyme pattern. The old bridge has a wrinkled face. He bends his back For us to go over. \u2014From Hilda Conkling, \"The Old Bridge\" The syllables in bold are strong. You can see this poem does not have a regular rhythm. It also doesn't have a rhyme pattern. Repetition is when words, phrases, or whole lines are repeated. The dainty flying squirrel In vest of shining white, In coat of silver gray, And vest of shining white. \u2014Adapted from Mary E. Burt, \"The Flying Squirrel\" Alliteration is when beginning consonant sounds are repeated in words that are close together. Where the wild men watched and waited Wolves in the forest, and bears in the bush. \u2014From Bayard Taylor, \"A Night with a Wolf\" Onomatopoeia is when language sounds like what it talks about. Sometimes the onomatopoeia uses made-up words: Tlot-tlot! tlot-tlot! Had they heard it? The horse hoofs ringing clear. \u2014From Alfred Noyes, \"The Highwayman\" Sometimes the onomatopoeia uses real words: Hark! the honey bee is humming. \u2014From Mary Howitt, \"The Voice of Spring\"",
    "solution":"This poem uses repetition. It repeats words, phrases, or lines.\nDown, down, down!\nDown to the depths of the sea!\nSinging most joyfully.",
    "split":"val",
    "path":null
  },
  {
    "question":"Complete the statement. Assume that the water balloon's mass did not change.\nThe gravitational potential energy stored between the water balloon and Earth () as the water balloon fell toward Paul.",
    "choices":[
      "increased",
      "stayed the same",
      "decreased"
    ],
    "answer":2,
    "hint":"Read the text about an object in motion.\nBridgette dropped a water balloon off a balcony. The water balloon fell toward her friend Paul, who was standing below the balcony.",
    "image":null,
    "task":"closed-choice",
    "grade":"grade8",
    "subject":"natural science",
    "topic":"physics",
    "category":"Kinetic and potential energy",
    "skill":"Identify changes in gravitational potential energy",
    "lecture":"Gravitational potential energy is stored between any two objects. So, for every object on or near Earth, there is gravitational potential energy stored between the object and Earth. The amount of gravitational potential energy stored between an object and Earth depends on the mass of the object. The amount of gravitational potential energy also depends on the distance between the object and the center of Earth. This distance increases when the object moves higher and decreases when the object moves lower. If the distance between an object and the center of Earth changes, the gravitational potential energy stored between the object and Earth will change. The table below shows how this change can happen. <br\/><br\/> When an object's mass stays the same and its distance from the center of Earth... | Gravitational potential energy stored between the object and Earth...<br\/> increases | increases<br\/> decreases | decreases<br\/> stays the same | stays the same<br\/>",
    "solution":"Think about how the distance between the water balloon and the center of Earth changed.\nPaul was lower than the balcony. As the water balloon fell toward Paul, the distance between the water balloon and the center of Earth decreased. So, the gravitational potential energy stored between the water balloon and Earth decreased as the water balloon fell toward Paul.",
    "split":"val",
    "path":null
  },
  {
    "question":"What evidence of a wildfire does this picture show?",
    "choices":[
      "There is white ash on the ground.",
      "Some of the trees have green leaves."
    ],
    "answer":0,
    "hint":"This picture was taken after a wildfire. A wildfire happens when a natural area catches fire and burns.",
    "image":"image.png",
    "task":"closed-choice",
    "grade":"grade2",
    "subject":"natural science",
    "topic":"earth-science",
    "category":"Earth events",
    "skill":"Find evidence of changes to Earth's surface",
    "lecture":"Evidence is information that tells you something happened. How do you look for evidence of a change to Earth's surface? There are many ways to find evidence of a change to Earth's surface. One way is to look at a picture that was taken after the change. Here are some examples of what the evidence for different changes might be: <br\/><br\/> Cause of the change | Evidence of the change<br\/> earthquake | cracks in the ground; houses with broken walls and roofs<br\/> volcanic eruption | melted rock on Earth's surface; smoke coming out of a hole in the ground<br\/> erosion | a canyon with a river flowing through it; a river carrying sand and mud<br\/> <br\/> Be careful when you are looking for evidence! A picture of Earth's surface can contain a lot of information. Some of that information might be evidence of a change to the surface, but some of it is not! For example, a picture taken after an earthquake might show a blue sky. But the color of the sky is not evidence of an earthquake. So, that information is not evidence that an earthquake happened.",
    "solution":null,
    "split":"val",
    "path":"https:\/\/scienceqa-webdemo.s3.us-west-1.amazonaws.com\/extra\/829\/image.png"
  },
  {
    "question":"Does this passage describe the weather or the climate?\nManuel noticed that the sky was filled with cumulus clouds every day last week.",
    "choices":[
      "weather",
      "climate"
    ],
    "answer":0,
    "hint":"Hint: Weather is what the atmosphere is like at a certain place and time. Climate is the pattern of weather in a certain place.",
    "image":null,
    "task":"closed-choice",
    "grade":"grade4",
    "subject":"natural science",
    "topic":"earth-science",
    "category":"Weather and climate",
    "skill":"What's the difference between weather and climate?",
    "lecture":"The atmosphere is the layer of air that surrounds Earth. Both weather and climate tell you about the atmosphere. Weather is what the atmosphere is like at a certain place and time. Weather can change quickly. For example, the temperature outside your house might get higher throughout the day. Climate is the pattern of weather in a certain place. For example, summer temperatures in New York are usually higher than winter temperatures.",
    "solution":"Read the text carefully.\nManuel noticed that the sky was filled with cumulus clouds every day last week.\nThis passage tells you about the clouds Manuel saw last week. It describes the atmosphere at a certain place and time. So, this passage describes the weather.",
    "split":"val",
    "path":null
  },
  {
    "question":"Which job does the circulatory system do?",
    "choices":[
      "It breaks down food into small pieces.",
      "It helps remove carbon dioxide waste from the body."
    ],
    "answer":1,
    "hint":null,
    "image":null,
    "task":"closed-choice",
    "grade":"grade4",
    "subject":"natural science",
    "topic":"biology",
    "category":"Animals",
    "skill":"Body systems: circulation and respiration",
    "lecture":"To stay alive, animal cells must get water and oxygen. Animal cells also produce carbon dioxide, a waste that must be removed. An animal's respiratory and circulatory systems work together to do these jobs. An animal's respiratory system is made up of organs that work together to bring in oxygen gas from the environment. The respiratory system also removes carbon dioxide gas from the animal's body. Some animals have lungs to exchange oxygen and carbon dioxide with the air. Other animals have gills to exchange oxygen and carbon dioxide with water. An animal's circulatory system is made up of organs that work together to move blood through its body. The heart pumps blood through blood vessels throughout the body. As blood moves through blood vessels, it delivers oxygen, nutrients from food, and water to cells. Blood also absorbs waste, including carbon dioxide. When the blood is pumped into the lungs or gills, it releases carbon dioxide and absorbs oxygen.",
    "solution":"The circulatory system brings oxygen, nutrients, and water to cells. It also helps remove carbon dioxide waste.\nThe circulatory system does not break down food into small pieces. This job is done by the digestive system. After the digestive system breaks down food, blood vessels in the intestines absorb the nutrients from the food. The blood then carries the nutrients to cells throughout the body.",
    "split":"val",
    "path":null
  },
  {
    "question":"Is granodiorite a mineral?",
    "choices":[
      "yes",
      "no"
    ],
    "answer":1,
    "hint":"Granodiorite has the following properties:\nnot made by organisms\nno fixed crystal structure\nsolid\nnot a pure substance\nnaturally occurring",
    "image":"image.png",
    "task":"yes-or-no",
    "grade":"grade5",
    "subject":"natural science",
    "topic":"earth-science",
    "category":"Rocks and minerals",
    "skill":"Identify rocks and minerals",
    "lecture":"Properties are used to identify different substances. Minerals have the following properties: It is a solid. It is formed in nature. It is not made by organisms. It is a pure substance. It has a fixed crystal structure. If a substance has all five of these properties, then it is a mineral. Look closely at the last three properties: A mineral is not made by organisms. Organisms make their own body parts. For example, snails and clams make their shells. Because they are made by organisms, body parts cannot be minerals. Humans are organisms too. So, substances that humans make by hand or in factories cannot be minerals. A mineral is a pure substance. A pure substance is made of only one type of matter. All minerals are pure substances. A mineral has a fixed crystal structure. The crystal structure of a substance tells you how the atoms or molecules in the substance are arranged. Different types of minerals have different crystal structures, but all minerals have a fixed crystal structure. This means that the atoms or molecules in different pieces of the same type of mineral are always arranged the same way.",
    "solution":"Granodiorite does not have all the properties of a mineral. So, granodiorite is not a mineral.",
    "split":"val",
    "path":"https:\/\/scienceqa-webdemo.s3.us-west-1.amazonaws.com\/extra\/839\/image.png"
  },
  {
    "question":"Would you find the word wild on a dictionary page with the following guide words?\nwell - word",
    "choices":[
      "no",
      "yes"
    ],
    "answer":1,
    "hint":null,
    "image":null,
    "task":"yes-or-no",
    "grade":"grade2",
    "subject":"language science",
    "topic":"reference-skills",
    "category":"Reference skills",
    "skill":"Use guide words",
    "lecture":"Guide words appear on each page of a dictionary. They tell you the first word and last word on the page. The other words on the page come between the guide words in alphabetical order. To put words in alphabetical order, put them in order by their first letters. If the first letters are the same, look at the second letters. If the second letters are the same, look at the third letters, and so on.",
    "solution":"Put the words in alphabetical order.\nSince wild is between the guide words well - word, it would be found on that page.",
    "split":"val",
    "path":null
  },
  {
    "question":"Is the following trait inherited or acquired?\nReggie has a scar on his left hand.",
    "choices":[
      "acquired",
      "inherited"
    ],
    "answer":0,
    "hint":null,
    "image":null,
    "task":"closed-choice",
    "grade":"grade5",
    "subject":"natural science",
    "topic":"biology",
    "category":"Traits and heredity",
    "skill":"Identify inherited and acquired traits",
    "lecture":"Organisms, including people, have both inherited and acquired traits. Inherited and acquired traits are gained in different ways. Inherited traits are passed down through families. Children gain these traits from their parents. Inherited traits do not need to be learned. Acquired traits are gained during a person's life. Some acquired traits, such as riding a bicycle, are gained by learning. Other acquired traits, such as scars, are caused by the environment. Children do not inherit their parents' acquired traits.",
    "solution":"Children do not inherit their parent's scars. Instead, scars are caused by the environment. People can get scars after they get hurt. So, having a scar is an acquired trait.",
    "split":"val",
    "path":null
  },
  {
    "question":"Would you find the word mumble on a dictionary page with the following guide words?\nmedicine - mid",
    "choices":[
      "yes",
      "no"
    ],
    "answer":1,
    "hint":null,
    "image":null,
    "task":"yes-or-no",
    "grade":"grade4",
    "subject":"language science",
    "topic":"reference-skills",
    "category":"Reference skills",
    "skill":"Use guide words",
    "lecture":"Guide words appear on each page of a dictionary. They tell you the first word and last word on the page. The other words on the page come between the guide words in alphabetical order. To put words in alphabetical order, put them in order by their first letters. If the first letters are the same, look at the second letters. If the second letters are the same, look at the third letters, and so on. If one word is shorter, and there are no more letters to compare, then the shorter word comes first in alphabetical order. For example, be comes before bed.",
    "solution":"Put the words in alphabetical order.\nSince mumble is not between the guide words medicine - mid, it would not be found on that page.",
    "split":"val",
    "path":null
  },
  {
    "question":"Select the one animal that has all of the amphibian traits listed above.",
    "choices":[
      "African elephants have thin hair covering their body. Female elephants feed their offspring milk. Elephants live in groups called herds. The oldest female in the herd is usually the leader.",
      "Gray tree frogs hatch from eggs without shells. They live underwater when they are tadpoles. They move onto land when they become adults. The moist skin of adult gray tree frogs can be green or gray. The color of their skin helps them hide on rocks or plants."
    ],
    "answer":1,
    "hint":"Amphibians are a group of animals with similar traits. The following traits can be used to identify amphibians:\nThey spend part of their lives in water and part on land.\nThey have moist skin.\nThey make eggs with no shells. Observe the animals and read the descriptions.",
    "image":null,
    "task":"closed-choice",
    "grade":"grade4",
    "subject":"natural science",
    "topic":"biology",
    "category":"Classification",
    "skill":"Use evidence to classify mammals, birds, fish, reptiles, and amphibians",
    "lecture":"Scientists sort animals with similar traits into groups. This is called classification. Classification helps scientists learn about how animals live. How do scientists classify animals? First, they make observations about an animal. Scientists observe the animal's traits, including its body parts and behavior. Then, scientists compare the animal's traits to other animals' traits. Scientists classify animals with similar traits into a group.",
    "solution":"To decide if an animal is part of a group, look at the traits of the group.\nAmphibians have the following traits:\nThey spend part of their lives in water and part on land.\nThey have moist skin.\nThey make eggs with no shells.\nCompare each animal's traits to the group's traits. Select the animal with traits similar to the group's traits.\nAn African elephant has the following traits:\nIt feeds its offspring milk.\nIt has hair.\nAn African elephant does not have all of the traits of an amphibian. An African elephant is a mammal.\nA gray tree frog has the following traits:\nIt spends part of its life in water and part on land.\nIt has moist skin.\nIt makes eggs with no shells.\nA gray tree frog has the traits of an amphibian. A gray tree frog is an amphibian.",
    "split":"val",
    "path":null
  },
  {
    "question":"Select the organism in the same species as the black-headed gull.",
    "choices":[
      "Chroicocephalus ridibundus",
      "Chroicocephalus serranus",
      "Crocodylus moreletii"
    ],
    "answer":0,
    "hint":"This organism is a black-headed gull. Its scientific name is Chroicocephalus ridibundus.",
    "image":"image.png",
    "task":"closed-choice",
    "grade":"grade8",
    "subject":"natural science",
    "topic":"biology",
    "category":"Classification and scientific names",
    "skill":"Use scientific names to classify organisms",
    "lecture":"Scientists use scientific names to identify organisms. Scientific names are made of two words. The first word in an organism's scientific name tells you the organism's genus. A genus is a group of organisms that share many traits. A genus is made up of one or more species. A species is a group of very similar organisms. The second word in an organism's scientific name tells you its species within its genus. Together, the two parts of an organism's scientific name identify its species. For example Ursus maritimus and Ursus americanus are two species of bears. They are part of the same genus, Ursus. But they are different species within the genus. Ursus maritimus has the species name maritimus. Ursus americanus has the species name americanus. Both bears have small round ears and sharp claws. But Ursus maritimus has white fur and Ursus americanus has black fur.",
    "solution":"A black-headed gull's scientific name is Chroicocephalus ridibundus.\nChroicocephalus ridibundus is in the same genus as Chroicocephalus serranus, but they are not in the same species.\nOrganisms in the same species have the same scientific names. Chroicocephalus ridibundus and Chroicocephalus serranus are different species within the same genus.\nChroicocephalus ridibundus has the same scientific name as a black-headed gull. So, these organisms are in the same species.\nCrocodylus moreletii does not have the same scientific name as a black-headed gull. So, Chroicocephalus ridibundus and Crocodylus moreletii are not in the same species.",
    "split":"val",
    "path":"https:\/\/scienceqa-webdemo.s3.us-west-1.amazonaws.com\/extra\/863\/image.png"
  },
  {
    "question":"Based on this information, what is Roxie's phenotype for the fur color trait?",
    "choices":[
      "FF",
      "black fur"
    ],
    "answer":1,
    "hint":"In a group of Labrador retrievers, some individuals have black fur and others have brown fur. In this group, the gene for the fur color trait has two alleles. The allele F is for black fur, and the allele f is for brown fur.\nRoxie, a Labrador retriever from this group, has black fur. Roxie has two alleles for black fur.",
    "image":null,
    "task":"closed-choice",
    "grade":"grade6",
    "subject":"natural science",
    "topic":"biology",
    "category":"Genes to traits",
    "skill":"Genetics vocabulary: genotype and phenotype",
    "lecture":"All organisms have pieces of hereditary material called genes, which are passed from parents to offspring. Genes contain instructions for building the parts of an organism. An organism's genes affect its observable traits, including its appearance, its behavior, and which diseases it may have. Genes may have different alleles, or forms, that can cause different versions of a trait. For example, flower color is a trait in pea plants. The gene for this trait has two possible alleles. Each allele is represented by an uppercase or lowercase letter. The allele F is for purple flowers, and the allele f is for white flowers. Each pea plant has two alleles for the flower color gene\u2014one allele inherited from each parent. An organism's genotype for a gene is its combination of alleles for that gene. So, a pea plant may have a genotype of FF, Ff, or ff for the flower color gene. An organism's phenotype for a trait is its observable version of that trait, which depends on the organism's combination of alleles. A pea plant may have a phenotype of purple flowers or white flowers for the flower color trait.",
    "solution":"An organism's phenotype for a trait is its observable version of that trait. Roxie's observable version of the fur color trait is black fur. So, Roxie's phenotype for the fur color trait is black fur.",
    "split":"val",
    "path":null
  },
  {
    "question":"Select the invertebrate.",
    "choices":[
      "macaw",
      "domestic pig",
      "giant wood wasp",
      "tokay gecko"
    ],
    "answer":2,
    "hint":"Hint: Insects, spiders, and worms are invertebrates.",
    "image":null,
    "task":"closed-choice",
    "grade":"grade5",
    "subject":"natural science",
    "topic":"biology",
    "category":"Classification",
    "skill":"Identify vertebrates and invertebrates",
    "lecture":"Vertebrates and invertebrates are both groups of animals. A vertebrate has a backbone. The backbone is made of many bones in an animal's back. A vertebrate's backbone helps connect the different parts of its body. In the drawings below, each vertebrate's backbone is colored orange. An invertebrate does not have a backbone. In fact, invertebrates do not have any bones! Some invertebrates have an outer cover on their body called an exoskeleton. Other invertebrates have a soft body.",
    "solution":"A macaw is a bird. Like other birds, a macaw is a vertebrate. It has a backbone.\nA domestic pig is a mammal. Like other mammals, a domestic pig is a vertebrate. It has a backbone.\nA giant wood wasp is an insect. Like other insects, a giant wood wasp is an invertebrate. It does not have a backbone. It has an exoskeleton.\nA tokay gecko is a reptile. Like other reptiles, a tokay gecko is a vertebrate. It has a backbone.",
    "split":"val",
    "path":null
  },
  {
    "question":"Which basketball has a higher temperature?",
    "choices":[
      "the basketball with more thermal energy",
      "the basketball with less thermal energy"
    ],
    "answer":0,
    "hint":"Two basketballs are identical except for their thermal energies.",
    "image":null,
    "task":"closed-choice",
    "grade":"grade5",
    "subject":"natural science",
    "topic":"physics",
    "category":"Heat and thermal energy",
    "skill":"How are temperature and mass related to thermal energy?",
    "lecture":"Matter is made of tiny particles called atoms. Atoms are always moving. The energy of moving atoms is called thermal energy. The total amount of thermal energy in matter depends on three things: the type of matter, the amount of matter, and how fast the atoms are moving. Temperature measures how hot or cold matter is. If the atoms in matter move faster, the temperature goes up. The matter now has both more thermal energy and a higher temperature. What happens if the amount of matter changes? A 2-kilogram brick at 70\u00b0F has twice as much thermal energy as a 1-kilogram brick at 70\u00b0F. The two bricks have the same temperature, but the larger brick has twice as many atoms. So, it has twice as much thermal energy.",
    "solution":"The two basketballs are made of the same material and have the same mass. So, the basketball with more thermal energy has a higher temperature.",
    "split":"val",
    "path":null
  },
  {
    "question":"Which is a compound sentence?",
    "choices":[
      "China grows most of the wheat in the world.",
      "Mr. Everett cleans the chimney, and Mrs. Everett washes the car."
    ],
    "answer":1,
    "hint":null,
    "image":null,
    "task":"closed-choice",
    "grade":"grade3",
    "subject":"language science",
    "topic":"grammar",
    "category":"Sentences, fragments, and run-ons",
    "skill":"Is the sentence simple or compound?",
    "lecture":"A simple sentence is a sentence with only one subject and predicate. The pitcher threw the ball to first base. A compound sentence is two simple sentences joined by a comma and a conjunction such as and, but, or, or so. The pitcher threw the ball, and the batter hit it. Some simple sentences have a compound subject or a compound predicate, but they are not compound sentences. Anna and James will watch the fireworks tonight. This simple sentence has a compound subject, Anna and James. The singers bowed and walked off the stage. This simple sentence has a compound predicate, bowed and walked off the stage. Some simple sentences have introductory phrases, but they are not compound sentences. The introductory phrase is part of the predicate. In the winter, Farmer Ben wears his heavy coat. This is a simple sentence. There is one subject, Farmer Ben, and one predicate, wears his heavy coat in the winter.",
    "solution":"The first sentence is the compound sentence. It is made up of two simple sentences joined by a comma and the conjunction and.\nMr. Everett cleans the chimney, and Mrs. Everett washes the car.",
    "split":"val",
    "path":null
  },
  {
    "question":"Identify the question that Cooper's experiment can best answer.",
    "choices":[
      "Can pennies hold more drops of water mixed with dish soap or water mixed with hand soap?",
      "Can pennies hold more drops of pure water or water mixed with hand soap?"
    ],
    "answer":1,
    "hint":"The passage below describes an experiment. Read the passage and then follow the instructions below.\n\nCooper used a dropper to put equal-sized drops of pure water, one at a time, onto a penny. The drops stayed together and formed a dome on the penny's surface. Cooper recorded the number of drops he could add before the water spilled over the edge of the penny. Then, he rinsed and dried the penny, and repeated the test using water mixed with hand soap. He repeated these trials on nine additional pennies. Cooper compared the average number of pure water drops to the average number of water drops mixed with hand soap that he could add to a penny before the water spilled over.\nFigure: a dome of water on the surface of a penny.",
    "image":"image.png",
    "task":"closed-choice",
    "grade":"grade6",
    "subject":"natural science",
    "topic":"science-and-engineering-practices",
    "category":"Designing experiments",
    "skill":"Identify the experimental question",
    "lecture":"Experiments can be designed to answer specific questions. How can you identify the questions that a certain experiment can answer? In order to do this, you need to figure out what was tested and what was measured during the experiment. Imagine an experiment with two groups of daffodil plants. One group of plants was grown in sandy soil, and the other was grown in clay soil. Then, the height of each plant was measured. First, identify the part of the experiment that was tested. The part of an experiment that is tested usually involves the part of the experimental setup that is different or changed. In the experiment described above, each group of plants was grown in a different type of soil. So, the effect of growing plants in different soil types was tested. Then, identify the part of the experiment that was measured. The part of the experiment that is measured may include measurements and calculations. In the experiment described above, the heights of the plants in each group were measured. Experiments can answer questions about how the part of the experiment that is tested affects the part that is measured. So, the experiment described above can answer questions about how soil type affects plant height. Examples of questions that this experiment can answer include: Does soil type affect the height of daffodil plants? Do daffodil plants in sandy soil grow taller than daffodil plants in clay soil? Are daffodil plants grown in sandy soil shorter than daffodil plants grown in clay soil?",
    "solution":null,
    "split":"val",
    "path":"https:\/\/scienceqa-webdemo.s3.us-west-1.amazonaws.com\/extra\/885\/image.png"
  },
  {
    "question":"Compare the average kinetic energies of the particles in each sample. Which sample has the higher temperature?",
    "choices":[
      "neither; the samples have the same temperature",
      "sample A",
      "sample B"
    ],
    "answer":2,
    "hint":"The diagrams below show two pure samples of gas in identical closed, rigid containers. Each colored ball represents one gas particle. Both samples have the same number of particles.",
    "image":"image.png",
    "task":"closed-choice",
    "grade":"grade6",
    "subject":"natural science",
    "topic":"physics",
    "category":"Particle motion and energy",
    "skill":"Identify how particle motion affects temperature and pressure",
    "lecture":"The temperature of a substance depends on the average kinetic energy of the particles in the substance. The higher the average kinetic energy of the particles, the higher the temperature of the substance. The kinetic energy of a particle is determined by its mass and speed. For a pure substance, the greater the mass of each particle in the substance and the higher the average speed of the particles, the higher their average kinetic energy.",
    "solution":"Each particle in sample B has more mass than each particle in sample A. The particles in sample B also have a higher average speed than the particles in sample A. So, the particles in sample B have a higher average kinetic energy than the particles in sample A.\nBecause the particles in sample B have the higher average kinetic energy, sample B must have the higher temperature.",
    "split":"val",
    "path":"https:\/\/scienceqa-webdemo.s3.us-west-1.amazonaws.com\/extra\/891\/image.png"
  },
  {
    "question":"Does this passage describe the weather or the climate?",
    "choices":[
      "weather",
      "climate"
    ],
    "answer":1,
    "hint":"Figure: Prague.\nThe Charles Bridge spans the Vltava River in Prague. Winters are windy in Prague, with average wind speeds of 11 miles per hour in December, January, and February.\nHint: Weather is what the atmosphere is like at a certain place and time. Climate is the pattern of weather in a certain place.",
    "image":"image.png",
    "task":"closed-choice",
    "grade":"grade6",
    "subject":"natural science",
    "topic":"earth-science",
    "category":"Weather and climate",
    "skill":"Weather and climate around the world",
    "lecture":"The atmosphere is the layer of air that surrounds Earth. Both weather and climate tell you about the atmosphere. Weather is what the atmosphere is like at a certain place and time. Weather can change quickly. For example, the temperature outside your house might get higher throughout the day. Climate is the pattern of weather in a certain place. For example, summer temperatures in New York are usually higher than winter temperatures.",
    "solution":"Read the passage carefully.\nThe Charles Bridge spans the Vltava River in Prague. Winters are windy in Prague, with average wind speeds of 11 miles per hour in December, January, and February.\nThe underlined part of the passage tells you about the usual wind patterns in Prague. This passage does not describe what the weather is like on a particular day. So, this passage describes the climate.",
    "split":"val",
    "path":"https:\/\/scienceqa-webdemo.s3.us-west-1.amazonaws.com\/extra\/896\/image.png"
  },
  {
    "question":"What information supports the conclusion that Joy inherited this trait?",
    "choices":[
      "Joy and her mother both wear their hair in braids.",
      "Joy's parents have red hair. They passed down this trait to Joy."
    ],
    "answer":1,
    "hint":"Read the description of a trait.\nJoy has red hair.",
    "image":null,
    "task":"closed-choice",
    "grade":"grade6",
    "subject":"natural science",
    "topic":"biology",
    "category":"Genes to traits",
    "skill":"Inherited and acquired traits: use evidence to support a statement",
    "lecture":"Organisms, including people, have both inherited and acquired traits. Inherited and acquired traits are gained in different ways. Inherited traits are passed down from biological parents to their offspring through genes. Genes are pieces of hereditary material that contain the instructions that affect inherited traits. Offspring receive their genes, and therefore gain their inherited traits, from their biological parents. Inherited traits do not need to be learned. Acquired traits are gained during a person's life. Some acquired traits, such as riding a bicycle, are gained by learning. Other acquired traits, such as scars, are caused by the environment. Parents do not pass acquired traits down to their offspring.",
    "solution":null,
    "split":"val",
    "path":null
  },
  {
    "question":"Which logical fallacy is used in the text?\nA rainbow appeared in the sky the day before basketball tryouts, and I made the team! If there's a rainbow when I try out in the spring, I'm sure I'll make the team again.",
    "choices":[
      "ad hominem: a personal attack against one's opponent",
      "false causation: the assumption that because two things happened together, one caused the other"
    ],
    "answer":1,
    "hint":null,
    "image":null,
    "task":"closed-choice",
    "grade":"grade8",
    "subject":"language science",
    "topic":"writing-strategies",
    "category":"Developing and supporting arguments",
    "skill":"Classify logical fallacies",
    "lecture":"A strong argument uses valid reasoning and logic in support of a claim. When an argument or claim introduces irrelevant information or misrepresents the issues at hand, it may be committing a logical fallacy. Logical fallacies can hurt a writer's credibility and can lead readers to draw false conclusions. A logical fallacy may present irrelevant information: <br\/><br\/> Fallacy | Description<br\/> ad hominem | a personal attack meant to discredit one's opponent<br\/> appeal to nature | an argument that assumes the natural choice is always the best choice<br\/> bandwagon fallacy | an argument that assumes the popular choice is always the best choice<br\/> circular reasoning | an argument that supports a claim with the claim itself<br\/> guilt by association | an unfair negative association with another person or group that is intended to discredit someone or something<br\/> red herring | the use of a completely unrelated topic in support of a claim<br\/> <br\/> A logical fallacy may misrepresent the issues at hand: <br\/><br\/> Fallacy | Description<br\/> false causation | the assumption that because two things happened together, one caused the other<br\/> false dichotomy | an argument that presents only two choices when more options exist<br\/> hasty generalization | a very broad claim based on very little evidence<br\/> straw man | a misrepresentation of an opponent's position that makes it easier to argue against<br\/>",
    "solution":"The text argues that the rainbow is responsible for the speaker making the basketball team. However, even though the speaker made the team after the rainbow appeared, that doesn't necessarily mean that the rainbow was responsible. This illustrates a type of logical fallacy known as false causation.",
    "split":"val",
    "path":null
  },
  {
    "question":"Which is a run-on sentence?",
    "choices":[
      "All the things in the back of the closet.",
      "Jayla is from Springdale now she lives in Dover."
    ],
    "answer":1,
    "hint":null,
    "image":null,
    "task":"closed-choice",
    "grade":"grade3",
    "subject":"language science",
    "topic":"writing-strategies",
    "category":"Sentences, fragments, and run-ons",
    "skill":"Is it a complete sentence, a fragment, or a run-on?",
    "lecture":"A sentence is a group of words that forms a complete thought. It has both a subject and a verb. My friends walk along the path. A sentence fragment is a group of words that does not express a complete thought. It is usually missing a subject or a verb. Knows the answer. This is a sentence fragment. It is missing a subject. Who knows the answer? She knows the answer. The bright red car. This is a sentence fragment. It is missing a verb. What did the bright red car do? The bright red car stopped. A run-on sentence is made up of two sentences that are joined without end punctuation or with just a comma. I knocked on the door it opened. It started raining, we ran inside. To fix a run-on sentence, separate it into two sentences. Add end punctuation after the first sentence, and capitalize the second sentence. I knocked on the door. It opened. It started raining. We ran inside. You can also fix a run-on sentence by rewriting it as a compound sentence. A compound sentence is two sentences joined by a comma and a conjunction such as and, but, or, or so. I knocked on the door, and it opened. It started raining, so we ran inside.",
    "solution":"Jayla is from Springdale now she lives in Dover is a run-on sentence. It has two sentences that are joined without end punctuation: Jayla is from Springdale and Now she lives in Dover.",
    "split":"val",
    "path":null
  },
  {
    "question":"Which phrase has a more positive connotation?",
    "choices":[
      "a cozy house",
      "a small house"
    ],
    "answer":0,
    "hint":null,
    "image":null,
    "task":"closed-choice",
    "grade":"grade4",
    "subject":"language science",
    "topic":"vocabulary",
    "category":"Shades of meaning",
    "skill":"Positive and negative connotation",
    "lecture":"Connotation is the feeling or idea that goes along with a word or phrase. Some words are close in meaning but have different connotations. For example, think about the words eager and impatient. They both mean wanting something to happen, but they have different connotations. Eager has a positive connotation. It is a nice word. An eager person is happy and excited. Impatient has a negative connotation. It is not a nice word. An impatient person is often pushy and demanding.",
    "solution":"A cozy house has a more positive connotation. A cozy house is small, but it is comfortable and warm.",
    "split":"val",
    "path":null
  },
  {
    "question":"Select the organism in the same species as the marbled salamander.",
    "choices":[
      "Taricha torosa",
      "Taricha granulosa",
      "Ambystoma opacum"
    ],
    "answer":2,
    "hint":"This organism is a marbled salamander. Its scientific name is Ambystoma opacum.",
    "image":"image.png",
    "task":"closed-choice",
    "grade":"grade7",
    "subject":"natural science",
    "topic":"biology",
    "category":"Classification and scientific names",
    "skill":"Use scientific names to classify organisms",
    "lecture":"Scientists use scientific names to identify organisms. Scientific names are made of two words. The first word in an organism's scientific name tells you the organism's genus. A genus is a group of organisms that share many traits. A genus is made up of one or more species. A species is a group of very similar organisms. The second word in an organism's scientific name tells you its species within its genus. Together, the two parts of an organism's scientific name identify its species. For example Ursus maritimus and Ursus americanus are two species of bears. They are part of the same genus, Ursus. But they are different species within the genus. Ursus maritimus has the species name maritimus. Ursus americanus has the species name americanus. Both bears have small round ears and sharp claws. But Ursus maritimus has white fur and Ursus americanus has black fur.",
    "solution":"A marbled salamander's scientific name is Ambystoma opacum.\nTaricha granulosa does not have the same scientific name as a marbled salamander. So, Ambystoma opacum and Taricha granulosa are not in the same species.\nAmbystoma opacum has the same scientific name as a marbled salamander. So, these organisms are in the same species.\nTaricha torosa does not have the same scientific name as a marbled salamander. So, Ambystoma opacum and Taricha torosa are not in the same species.",
    "split":"val",
    "path":"https:\/\/scienceqa-webdemo.s3.us-west-1.amazonaws.com\/extra\/917\/image.png"
  },
  {
    "question":"Which animal's skin is better adapted as a warning sign to ward off predators?",
    "choices":[
      "flamboyant cuttlefish",
      "impala"
    ],
    "answer":0,
    "hint":"Opalescent nudibranchs have stinging cells in their brightly colored skin. The bright colors serve as a warning sign that the animal is toxic and dangerous. The 's skin is adapted to ward off predators.\nFigure: opalescent nudibranch.",
    "image":"image.png",
    "task":"closed-choice",
    "grade":"grade4",
    "subject":"natural science",
    "topic":"biology",
    "category":"Adaptations",
    "skill":"Animal adaptations: skins and body coverings",
    "lecture":"An adaptation is an inherited trait that helps an organism survive or reproduce. Adaptations can include both body parts and behaviors. The color, texture, and covering of an animal's skin are examples of adaptations. Animals' skins can be adapted in different ways. For example, skin with thick fur might help an animal stay warm. Skin with sharp spines might help an animal defend itself against predators.",
    "solution":"Look at the picture of the opalescent nudibranch.\nThe opalescent nudibranch has stinging cells in its brightly colored skin. Its skin is adapted to ward off predators. The bright colors serve as a warning sign that the opalescent nudibranch is toxic and dangerous.\nNow look at each animal. Figure out which animal has a similar adaptation.\nThe flamboyant cuttlefish has a poisonous body with brightly colored skin. Its skin is adapted to ward off predators.\nThe impala has yellow-brown fur. Its skin is not adapted to be a warning sign that wards off predators.",
    "split":"val",
    "path":"https:\/\/scienceqa-webdemo.s3.us-west-1.amazonaws.com\/extra\/919\/image.png"
  },
  {
    "question":"During this time, thermal energy was transferred from () to ().",
    "choices":[
      "the surroundings . . . each pizza",
      "each pizza . . . the surroundings"
    ],
    "answer":1,
    "hint":"Celine was delivering two identical pizzas to a customer. While driving to the customer's house, Celine put one of the pizza boxes on top of the other one. This table shows how the temperature of each pizza changed over 15minutes.",
    "image":"image.png",
    "task":"closed-choice",
    "grade":"grade7",
    "subject":"natural science",
    "topic":"physics",
    "category":"Thermal energy",
    "skill":"Compare thermal energy transfers",
    "lecture":"A change in an object's temperature indicates a change in the object's thermal energy: An increase in temperature shows that the object's thermal energy increased. So, thermal energy was transferred into the object from its surroundings. A decrease in temperature shows that the object's thermal energy decreased. So, thermal energy was transferred out of the object to its surroundings.",
    "solution":"The temperature of each pizza decreased, which means that the thermal energy of each pizza decreased. So, thermal energy was transferred from each pizza to the surroundings.",
    "split":"val",
    "path":"https:\/\/scienceqa-webdemo.s3.us-west-1.amazonaws.com\/extra\/920\/image.png"
  },
  {
    "question":"Which property matches this object?",
    "choices":[
      "scratchy",
      "flexible"
    ],
    "answer":1,
    "hint":"Select the better answer.",
    "image":"image.png",
    "task":"closed-choice",
    "grade":"grade3",
    "subject":"natural science",
    "topic":"physics",
    "category":"Materials",
    "skill":"Identify properties of an object",
    "lecture":"An object has different properties. A property of an object can tell you how it looks, feels, tastes, or smells. Properties can also tell you how an object will behave when something happens to it.",
    "solution":"Look at the object.\nThink about each property.\nA flexible object can be folded or bent without breaking easily. The tent is flexible.\nA scratchy object is rough and itchy against your skin. The tent is not scratchy.",
    "split":"val",
    "path":"https:\/\/scienceqa-webdemo.s3.us-west-1.amazonaws.com\/extra\/921\/image.png"
  },
  {
    "question":"What is the name of the colony shown?",
    "choices":[
      "New Hampshire",
      "Connecticut",
      "Vermont",
      "Georgia"
    ],
    "answer":0,
    "hint":null,
    "image":"image.png",
    "task":"closed-choice",
    "grade":"grade4",
    "subject":"social science",
    "topic":"us-history",
    "category":"English colonies in North America",
    "skill":"Identify the Thirteen Colonies",
    "lecture":null,
    "solution":"The colony is New Hampshire.\nDuring the colonial era, New Hampshire and New York both claimed the territory that would later become the state of Vermont. Vermont was never its own colony.",
    "split":"val",
    "path":"https:\/\/scienceqa-webdemo.s3.us-west-1.amazonaws.com\/extra\/924\/image.png"
  },
  {
    "question":"Will these magnets attract or repel each other?",
    "choices":[
      "repel",
      "attract"
    ],
    "answer":0,
    "hint":"Two magnets are placed as shown.\n\nHint: Magnets that attract pull together. Magnets that repel push apart.",
    "image":"image.png",
    "task":"closed-choice",
    "grade":"grade2",
    "subject":"natural science",
    "topic":"physics",
    "category":"Magnets",
    "skill":"Identify magnets that attract or repel",
    "lecture":"Magnets can pull or push on each other without touching. When magnets attract, they pull together. When magnets repel, they push apart. Whether a magnet attracts or repels other magnets depends on the positions of its poles, or ends. Every magnet has two poles, called north and south. Here are some examples of magnets. The north pole of each magnet is marked N, and the south pole is marked S. If different poles are closest to each other, the magnets attract. The magnets in the pair below attract. If the same poles are closest to each other, the magnets repel. The magnets in both pairs below repel.",
    "solution":"Will these magnets attract or repel? To find out, look at which poles are closest to each other.\nThe south pole of one magnet is closest to the south pole of the other magnet. Poles that are the same repel. So, these magnets will repel each other.",
    "split":"val",
    "path":"https:\/\/scienceqa-webdemo.s3.us-west-1.amazonaws.com\/extra\/927\/image.png"
  },
  {
    "question":"How long is a basketball court?",
    "choices":[
      "28 meters",
      "28 centimeters",
      "28 kilometers",
      "28 millimeters"
    ],
    "answer":0,
    "hint":"Select the best estimate.",
    "image":null,
    "task":"closed-choice",
    "grade":"grade7",
    "subject":"natural science",
    "topic":"units-and-measurement",
    "category":"Units and measurement",
    "skill":"Choose metric units of distance, mass, and volume",
    "lecture":"Measurements are written with both a number and a unit. The unit comes after the number. The unit shows what the number means. When you are using metric units, length can be written with units of millimeters, centimeters, meters, or kilometers. One meter contains 100 centimeters or 1,000 millimeters. So, 1 meter is larger than 1 centimeter, and 1 centimeter is larger than 1 millimeter. The tip of the pencil shown here is only 1 millimeter wide, but the pencil is about 16 centimeters long. A red fox is about 1 meter long. The Sydney Harbour Bridge in Australia is about 1,000 meters, or 1 kilometer, in length.",
    "solution":"The best estimate for the length of a basketball court is 28 meters.\n28 millimeters and 28 centimeters are too short. 28 kilometers is too long.",
    "split":"val",
    "path":null
  },
  {
    "question":"Identify the question that Jen's experiment can best answer.",
    "choices":[
      "Do radishes grown under bright light get bigger than radishes grown under dim light?",
      "Do radish plants grown under bright light have more leaves than radish plants grown under dim light?"
    ],
    "answer":0,
    "hint":"The passage below describes an experiment. Read the passage and then follow the instructions below.\n\nJen planted 20 radish plants in a greenhouse, putting each plant in its own pot. She placed ten of the pots under bright light and the other ten pots under dim light. Jen watered all the plants twice a day. After two months, she pulled the radish plants from the ground, threw away the leafy green tops, and measured the sizes of the radishes. She compared the sizes of the radishes grown under bright light to the sizes of the radishes grown under dim light.\nFigure: a radish plant in soil.",
    "image":"image.png",
    "task":"closed-choice",
    "grade":"grade7",
    "subject":"natural science",
    "topic":"science-and-engineering-practices",
    "category":"Designing experiments",
    "skill":"Identify the experimental question",
    "lecture":"Experiments can be designed to answer specific questions. How can you identify the questions that a certain experiment can answer? In order to do this, you need to figure out what was tested and what was measured during the experiment. Imagine an experiment with two groups of daffodil plants. One group of plants was grown in sandy soil, and the other was grown in clay soil. Then, the height of each plant was measured. First, identify the part of the experiment that was tested. The part of an experiment that is tested usually involves the part of the experimental setup that is different or changed. In the experiment described above, each group of plants was grown in a different type of soil. So, the effect of growing plants in different soil types was tested. Then, identify the part of the experiment that was measured. The part of the experiment that is measured may include measurements and calculations. In the experiment described above, the heights of the plants in each group were measured. Experiments can answer questions about how the part of the experiment that is tested affects the part that is measured. So, the experiment described above can answer questions about how soil type affects plant height. Examples of questions that this experiment can answer include: Does soil type affect the height of daffodil plants? Do daffodil plants in sandy soil grow taller than daffodil plants in clay soil? Are daffodil plants grown in sandy soil shorter than daffodil plants grown in clay soil?",
    "solution":null,
    "split":"val",
    "path":"https:\/\/scienceqa-webdemo.s3.us-west-1.amazonaws.com\/extra\/940\/image.png"
  },
  {
    "question":"What location was involved in the triangular trade?",
    "choices":[
      "China",
      "Great Britain"
    ],
    "answer":1,
    "hint":"By the 1700s, merchants in the Thirteen Colonies traded goods across the Atlantic Ocean in a pattern called triangular trade. Look at the map showing this trade. Then answer the question below.",
    "image":"image.png",
    "task":"closed-choice",
    "grade":"grade7",
    "subject":"social science",
    "topic":"us-history",
    "category":"The American Revolution",
    "skill":"Causes of the American Revolution: introduction to mercantilism and the Navigation Acts",
    "lecture":null,
    "solution":"Look at the map.\nThe arrows on the map show that goods moved to and from these locations:\nChina was not involved in the triangular trade.",
    "split":"val",
    "path":"https:\/\/scienceqa-webdemo.s3.us-west-1.amazonaws.com\/extra\/941\/image.png"
  },
  {
    "question":"What is the volume of a kitchen sink?",
    "choices":[
      "26 milliliters",
      "26 liters"
    ],
    "answer":1,
    "hint":"Select the better estimate.",
    "image":null,
    "task":"closed-choice",
    "grade":"grade5",
    "subject":"natural science",
    "topic":"units-and-measurement",
    "category":"Units and measurement",
    "skill":"Choose metric units of volume",
    "lecture":"Measurements are written with both a number and a unit. The unit comes after the number. The unit shows what the number means. Volume is a measurement of how much space something takes up. There are many different units of volume. When you are using metric units, volume may be written in units of milliliters or liters. There are 1,000 milliliters in 1 liter. So, 1 milliliter is much less than 1 liter. A raindrop has a volume of about 20 milliliters, while a large soda bottle has a volume of 2 liters. The flask shown here measures volumes up to 500 milliliters.",
    "solution":"The better estimate for the volume of a kitchen sink is 26 liters.\n26 milliliters is too little.",
    "split":"val",
    "path":null
  },
  {
    "question":"Which sentence is more formal?",
    "choices":[
      "The principal said that a lot of students graduating from Oakville High School got into the colleges they wanted to go to.",
      "The principal announced that half of Oakville High School's graduating class had been accepted to their top-choice colleges."
    ],
    "answer":1,
    "hint":null,
    "image":null,
    "task":"closed-choice",
    "grade":"grade7",
    "subject":"language science",
    "topic":"writing-strategies",
    "category":"Author's purpose and tone",
    "skill":"Which sentence is more formal?",
    "lecture":"Formal writing is used for essays, business letters, and reports. The following types of informal language should be avoided in formal writing: <br\/><br\/> Type | Examples<br\/> slang | cool, awesome<br\/> idioms | knock your socks off<br\/> conversational language | gonna, kinda, yeah<br\/> abbreviated language | ASAP, FYI<br\/> overly simple or imprecise language | he got some stuff at the store<br\/> contractions | can't, won't<br\/> <br\/> Contractions are not as informal as the other types, but they should be used sparingly in formal writing. Compare the following sentences. The first is informal. The second is formal. Informal: Yeah, ostriches can't fly, but they're awesome runners. Formal: Though ostriches are flightless, they are remarkably adept runners.",
    "solution":"The second sentence is less formal. You can tell because it uses overly simple or imprecise language (said, a lot of, got into).\nThe first sentence uses more precise language, so it is more formal overall.",
    "split":"val",
    "path":null
  },
  {
    "question":"What is the name of the colony shown?",
    "choices":[
      "Florida",
      "Vermont",
      "New Hampshire",
      "Maryland"
    ],
    "answer":2,
    "hint":null,
    "image":"image.png",
    "task":"closed-choice",
    "grade":"grade7",
    "subject":"social science",
    "topic":"us-history",
    "category":"Colonial America",
    "skill":"Identify the Thirteen Colonies",
    "lecture":null,
    "solution":"The colony is New Hampshire.\nDuring the colonial era, New Hampshire and New York both claimed the territory that would later become the state of Vermont. Vermont was never its own colony.",
    "split":"val",
    "path":"https:\/\/scienceqa-webdemo.s3.us-west-1.amazonaws.com\/extra\/958\/image.png"
  },
  {
    "question":"Based on this information, what is Kumal's phenotype for the coat pattern trait?",
    "choices":[
      "a spotted coat",
      "a black coat"
    ],
    "answer":0,
    "hint":"In a group of jaguars, some individuals have a black coat and others have a spotted coat. In this group, the gene for the coat pattern trait has two alleles. The allele for a black coat (A) is dominant over the allele for a spotted coat (a).\nKumal is a jaguar from this group. Kumal has the homozygous genotype aa for the coat pattern gene.",
    "image":null,
    "task":"closed-choice",
    "grade":"grade6",
    "subject":"natural science",
    "topic":"biology",
    "category":"Genes to traits",
    "skill":"Genetics vocabulary: dominant and recessive",
    "lecture":"All organisms have pieces of hereditary material called genes, which are passed from parents to offspring. Genes contain instructions for building the parts of an organism. An organism's genes affect its observable traits, including its appearance, its behavior, and which diseases it may have. Genes may have different alleles, or forms, that can cause different versions of a trait. For example, flower color is a trait in pea plants. The gene for this trait has two possible alleles. Each allele is represented by an uppercase or lowercase letter. The allele F is for purple flowers, and the allele f is for white flowers. Each pea plant has two alleles for the flower color gene\u2014one allele inherited from each parent. An organism's genotype for a gene is its combination of alleles for that gene. So, a pea plant may have a genotype of FF, Ff, or ff for the flower color gene. An organism's phenotype for a trait is its observable version of that trait, which depends on the organism's combination of alleles. A pea plant may have a phenotype of purple flowers or white flowers for the flower color trait. Some traits, like flower color in pea plants, are controlled by a single gene. Most plants and animals have a genotype made up of two alleles for these traits. These two alleles determine whether an organism is homozygous or heterozygous for the gene. An organism with two identical alleles for a gene is homozygous for that gene. A pea plant with the genotype FF or ff is homozygous for the flower color gene. An organism with two different alleles for a gene is heterozygous for that gene. A pea plant with the genotype Ff is heterozygous for the flower color gene. The types of alleles in an organism's genotype determine the organism's phenotype. Some alleles have types called dominant and recessive. These two types can cause different versions of a trait to appear as the organism's phenotype. A dominant allele causes its version of the trait to appear even when the organism also has a recessive allele for the gene. In pea plants, the F allele, which causes purple flowers, is dominant over the f allele. A pea plant with at least one F allele will have the F allele's version of the flower color trait. So, a plant with the genotype FF or Ff will have purple flowers. A recessive allele causes its version of the trait to appear only when the organism does not have any dominant alleles for the gene. In pea plants, the f allele, which causes white flowers, is recessive to the F allele. A pea plant with only f alleles will have the f allele's version of the flower color trait. So, a plant with the genotype ff will have white flowers.",
    "solution":"Kumal's genotype for the coat pattern gene is aa. Kumal's genotype of aa has only a alleles. The a allele is for a spotted coat. So, Kumal's phenotype for the coat pattern trait must be a spotted coat.\nTo check this answer, consider whether Kumal's alleles are dominant or recessive. The allele for a black coat (A) is dominant over the allele for a spotted coat (a). This means A is a dominant allele, and a is a recessive allele.\nKumal's genotype of aa has only recessive alleles. An organism with only recessive alleles for a gene will have the recessive allele's version of the trait. So, Kumal's phenotype for the coat pattern trait must be a spotted coat.",
    "split":"val",
    "path":null
  },
  {
    "question":"Based on this information, what is Mer's phenotype for the tail spots trait?",
    "choices":[
      "a spotted tail",
      "an unspotted tail"
    ],
    "answer":1,
    "hint":"In a group of guppies, some individuals have a spotted tail and others have an unspotted tail. In this group, the gene for the tail spots trait has two alleles. The allele for an unspotted tail (i) is recessive to the allele for a spotted tail (I).\nMer is a guppy from this group. Mer has the homozygous genotype ii for the tail spots gene.",
    "image":null,
    "task":"closed-choice",
    "grade":"grade7",
    "subject":"natural science",
    "topic":"biology",
    "category":"Genes to traits",
    "skill":"Genetics vocabulary: dominant and recessive",
    "lecture":"All organisms have pieces of hereditary material called genes, which are passed from parents to offspring. Genes contain instructions for building the parts of an organism. An organism's genes affect its observable traits, including its appearance, its behavior, and which diseases it may have. Genes may have different alleles, or forms, that can cause different versions of a trait. For example, flower color is a trait in pea plants. The gene for this trait has two possible alleles. Each allele is represented by an uppercase or lowercase letter. The allele F is for purple flowers, and the allele f is for white flowers. Each pea plant has two alleles for the flower color gene\u2014one allele inherited from each parent. An organism's genotype for a gene is its combination of alleles for that gene. So, a pea plant may have a genotype of FF, Ff, or ff for the flower color gene. An organism's phenotype for a trait is its observable version of that trait, which depends on the organism's combination of alleles. A pea plant may have a phenotype of purple flowers or white flowers for the flower color trait. Some traits, like flower color in pea plants, are controlled by a single gene. Most plants and animals have a genotype made up of two alleles for these traits. These two alleles determine whether an organism is homozygous or heterozygous for the gene. An organism with two identical alleles for a gene is homozygous for that gene. A pea plant with the genotype FF or ff is homozygous for the flower color gene. An organism with two different alleles for a gene is heterozygous for that gene. A pea plant with the genotype Ff is heterozygous for the flower color gene. The types of alleles in an organism's genotype determine the organism's phenotype. Some alleles have types called dominant and recessive. These two types can cause different versions of a trait to appear as the organism's phenotype. A dominant allele causes its version of the trait to appear even when the organism also has a recessive allele for the gene. In pea plants, the F allele, which causes purple flowers, is dominant over the f allele. A pea plant with at least one F allele will have the F allele's version of the flower color trait. So, a plant with the genotype FF or Ff will have purple flowers. A recessive allele causes its version of the trait to appear only when the organism does not have any dominant alleles for the gene. In pea plants, the f allele, which causes white flowers, is recessive to the F allele. A pea plant with only f alleles will have the f allele's version of the flower color trait. So, a plant with the genotype ff will have white flowers.",
    "solution":"Mer's genotype for the tail spots gene is ii. Mer's genotype of ii has only i alleles. The i allele is for an unspotted tail. So, Mer's phenotype for the tail spots trait must be an unspotted tail.\nTo check this answer, consider whether Mer's alleles are dominant or recessive. The allele for an unspotted tail (i) is recessive to the allele for a spotted tail (I). This means I is a dominant allele, and i is a recessive allele.\nMer's genotype of ii has only recessive alleles. An organism with only recessive alleles for a gene will have the recessive allele's version of the trait. So, Mer's phenotype for the tail spots trait must be an unspotted tail.",
    "split":"val",
    "path":null
  },
  {
    "question":"Complete the sentence.\nCracking open a peanut is a ().",
    "choices":[
      "chemical change",
      "physical change"
    ],
    "answer":1,
    "hint":null,
    "image":null,
    "task":"closed-choice",
    "grade":"grade2",
    "subject":"natural science",
    "topic":"chemistry",
    "category":"Physical and chemical change",
    "skill":"Identify physical and chemical changes",
    "lecture":"Chemical changes and physical changes are two ways matter can change. In a chemical change, the type of matter changes. Burning a piece of paper is a chemical change. The paper changes into ash and smoke. In a physical change, the type of matter stays the same. Cutting a piece of paper is a physical change. The cut pieces are still made of paper. Ice melting is also a physical change. When ice melts, it changes from a solid to a liquid. But both ice and liquid water are made of the same type of matter: water! This kind of change is called a change of state.",
    "solution":"Cracking open a peanut is a physical change. The peanut shell breaks and the peanut falls out. Both are still made of the same type of matter.",
    "split":"val",
    "path":null
  },
  {
    "question":"Is gypsum a mineral?",
    "choices":[
      "no",
      "yes"
    ],
    "answer":1,
    "hint":"Gypsum has the following properties:\npure substance\nfixed crystal structure\nnot made by organisms\nsolid\nnaturally occurring",
    "image":"image.png",
    "task":"yes-or-no",
    "grade":"grade6",
    "subject":"natural science",
    "topic":"earth-science",
    "category":"Rocks and minerals",
    "skill":"Identify rocks and minerals",
    "lecture":"Properties are used to identify different substances. Minerals have the following properties: It is a solid. It is formed in nature. It is not made by organisms. It is a pure substance. It has a fixed crystal structure. If a substance has all five of these properties, then it is a mineral. Look closely at the last three properties: A mineral is not made by organisms. Organisms make their own body parts. For example, snails and clams make their shells. Because they are made by organisms, body parts cannot be minerals. Humans are organisms too. So, substances that humans make by hand or in factories cannot be minerals. A mineral is a pure substance. A pure substance is made of only one type of matter. All minerals are pure substances. A mineral has a fixed crystal structure. The crystal structure of a substance tells you how the atoms or molecules in the substance are arranged. Different types of minerals have different crystal structures, but all minerals have a fixed crystal structure. This means that the atoms or molecules in different pieces of the same type of mineral are always arranged the same way.",
    "solution":"Gypsum has all the properties of a mineral. So, gypsum is a mineral.",
    "split":"val",
    "path":"https:\/\/scienceqa-webdemo.s3.us-west-1.amazonaws.com\/extra\/979\/image.png"
  },
  {
    "question":"Which of the following fossils is younger? Select the more likely answer.",
    "choices":[
      "crocodile egg",
      "feather"
    ],
    "answer":0,
    "hint":"This diagram shows fossils in an undisturbed sedimentary rock sequence.",
    "image":"image.png",
    "task":"closed-choice",
    "grade":"grade7",
    "subject":"natural science",
    "topic":"earth-science",
    "category":"Fossils",
    "skill":"Compare ages of fossils in a rock sequence",
    "lecture":"A fossil is the preserved evidence of an ancient organism. Some fossils are formed from body parts such as bones or shells. Other fossils, such as footprints or burrows, are formed from traces of an organism's activities. Fossils are typically found in sedimentary rocks. Sedimentary rocks usually form in layers. Over time, new layers are added on top of old layers in a series called a rock sequence. The layers in an undisturbed rock sequence are in the same order as when they formed. So, the deeper layers are older than the shallower layers. The relative ages of fossils can be determined from their positions in an undisturbed rock sequence. Older fossils are usually in deeper layers, and younger fossils are usually in shallower layers.",
    "solution":"Look again at the fossils in the rock sequence diagram.\nCompare the positions of these fossils to determine which one is younger:\nThe crocodile egg fossil is in a shallower layer in the rock sequence than the feather fossil. So, the crocodile egg fossil is most likely younger than the feather fossil.",
    "split":"val",
    "path":"https:\/\/scienceqa-webdemo.s3.us-west-1.amazonaws.com\/extra\/984\/image.png"
  },
  {
    "question":"What is the probability that a cow produced by this cross will be homozygous dominant for the coat pattern gene?",
    "choices":[
      "0\/4",
      "1\/4",
      "4\/4",
      "2\/4",
      "3\/4"
    ],
    "answer":0,
    "hint":"In a group of cows, some individuals have solid coloring and others have white spots. In this group, the gene for the coat pattern trait has two alleles. The allele for white spots (a) is recessive to the allele for solid coloring (A).\nThis Punnett square shows a cross between two cows.",
    "image":"image.png",
    "task":"closed-choice",
    "grade":"grade8",
    "subject":"natural science",
    "topic":"biology",
    "category":"Genes to traits",
    "skill":"Use Punnett squares to calculate probabilities of offspring types",
    "lecture":"Offspring genotypes: homozygous or heterozygous? How do you determine whether an organism is homozygous or heterozygous for a gene? Look at the alleles in the organism's genotype for that gene. An organism with two identical alleles for a gene is homozygous for that gene. If both alleles are dominant, the organism is homozygous dominant for the gene. If both alleles are recessive, the organism is homozygous recessive for the gene. An organism with two different alleles for a gene is heterozygous for that gene. In a Punnett square, each box represents a different outcome, or result. Each of the four outcomes is equally likely to happen. Each box represents one way the parents' alleles can combine to form an offspring's genotype.  Because there are four boxes in the Punnett square, there are four possible outcomes. An event is a set of one or more outcomes. The probability of an event is a measure of how likely the event is to happen. This probability is a number between 0 and 1, and it can be written as a fraction: probability of an event = number of ways the event can happen \/ number of equally likely outcomes You can use a Punnett square to calculate the probability that a cross will produce certain offspring. For example, the Punnett square below has two boxes with the genotype Ff. It has one box with the genotype FF and one box with the genotype ff. This means there are two ways the parents' alleles can combine to form Ff. There is one way they can combine to form FF and one way they can combine to form ff. <br\/><br\/>  | F | f<br\/> F | FF | Ff<br\/> f | Ff | ff<br\/> <br\/> Consider an event in which this cross produces an offspring with the genotype ff. The probability of this event is given by the following fraction: number of ways the event can happen \/ number of equally likely outcomes = number of boxes with the genotype ff \/ total number of boxes = 1 \/ 4",
    "solution":null,
    "split":"val",
    "path":"https:\/\/scienceqa-webdemo.s3.us-west-1.amazonaws.com\/extra\/992\/image.png"
  },
  {
    "question":"What is the capital of Wisconsin?",
    "choices":[
      "Lincoln",
      "Madison",
      "Helena",
      "Jefferson City"
    ],
    "answer":1,
    "hint":null,
    "image":"image.png",
    "task":"closed-choice",
    "grade":"grade5",
    "subject":"social science",
    "topic":"geography",
    "category":"State capitals",
    "skill":"Identify state capitals of the Midwest",
    "lecture":null,
    "solution":"Madison is the capital of Wisconsin.",
    "split":"val",
    "path":"https:\/\/scienceqa-webdemo.s3.us-west-1.amazonaws.com\/extra\/994\/image.png"
  },
  {
    "question":"What is the capital of Georgia?",
    "choices":[
      "Savannah",
      "Atlanta",
      "Nashville",
      "Carson City"
    ],
    "answer":1,
    "hint":null,
    "image":"image.png",
    "task":"closed-choice",
    "grade":"grade5",
    "subject":"social science",
    "topic":"geography",
    "category":"State capitals",
    "skill":"Identify state capitals of the Southeast",
    "lecture":null,
    "solution":"Atlanta is the capital of Georgia.",
    "split":"val",
    "path":"https:\/\/scienceqa-webdemo.s3.us-west-1.amazonaws.com\/extra\/995\/image.png"
  },
  {
    "question":"Which logical fallacy is used in the text?\nPresident Ballard is an effective communicator, because he has a natural talent for speaking with people.",
    "choices":[
      "circular reasoning: an argument that supports a claim with the claim itself",
      "false dichotomy: an argument that presents only two choices when more options exist"
    ],
    "answer":0,
    "hint":null,
    "image":null,
    "task":"closed-choice",
    "grade":"grade7",
    "subject":"language science",
    "topic":"writing-strategies",
    "category":"Developing and supporting arguments",
    "skill":"Classify logical fallacies",
    "lecture":"A strong argument uses valid reasoning and logic in support of a claim. When an argument or claim introduces irrelevant information or misrepresents the issues at hand, it may be committing a logical fallacy. Logical fallacies can hurt a writer's credibility and can lead readers to draw false conclusions. A logical fallacy may present irrelevant information: <br\/><br\/> Fallacy | Description<br\/> ad hominem | a personal attack meant to discredit one's opponent<br\/> appeal to nature | an argument that assumes the natural choice is always the best choice<br\/> bandwagon fallacy | an argument that assumes the popular choice is always the best choice<br\/> circular reasoning | an argument that supports a claim with the claim itself<br\/> guilt by association | an unfair negative association with another person or group that is intended to discredit someone or something<br\/> red herring | the use of a completely unrelated topic in support of a claim<br\/> <br\/> A logical fallacy may misrepresent the issues at hand: <br\/><br\/> Fallacy | Description<br\/> false causation | the assumption that because two things happened together, one caused the other<br\/> false dichotomy | an argument that presents only two choices when more options exist<br\/> hasty generalization | a very broad claim based on very little evidence<br\/> straw man | a misrepresentation of an opponent's position that makes it easier to argue against<br\/>",
    "solution":"The text argues that President Ballard is an effective communicator because he communicates well. However, the \"evidence\" is just a restatement of the claim itself. This illustrates a type of logical fallacy known as circular reasoning.",
    "split":"val",
    "path":null
  },
  {
    "question":"Select the organism in the same species as the axolotl.",
    "choices":[
      "Ambystoma mexicanum",
      "Camellia sasanqua",
      "Tigrisoma mexicanum"
    ],
    "answer":0,
    "hint":"This organism is an axolotl. Its scientific name is Ambystoma mexicanum.",
    "image":"image.png",
    "task":"closed-choice",
    "grade":"grade8",
    "subject":"natural science",
    "topic":"biology",
    "category":"Classification and scientific names",
    "skill":"Use scientific names to classify organisms",
    "lecture":"Scientists use scientific names to identify organisms. Scientific names are made of two words. The first word in an organism's scientific name tells you the organism's genus. A genus is a group of organisms that share many traits. A genus is made up of one or more species. A species is a group of very similar organisms. The second word in an organism's scientific name tells you its species within its genus. Together, the two parts of an organism's scientific name identify its species. For example Ursus maritimus and Ursus americanus are two species of bears. They are part of the same genus, Ursus. But they are different species within the genus. Ursus maritimus has the species name maritimus. Ursus americanus has the species name americanus. Both bears have small round ears and sharp claws. But Ursus maritimus has white fur and Ursus americanus has black fur.",
    "solution":"An axolotl's scientific name is Ambystoma mexicanum.\nAmbystoma mexicanum has the same scientific name as an axolotl. So, these organisms are in the same species.\nCamellia sasanqua does not have the same scientific name as an axolotl. So, Ambystoma mexicanum and Camellia sasanqua are not in the same species.\nTigrisoma mexicanum does have the same species within its genus as an axolotl, but they are not in the same genus! They do not have the same scientific name as each other. So, these organisms are not in the same species.",
    "split":"val",
    "path":"https:\/\/scienceqa-webdemo.s3.us-west-1.amazonaws.com\/extra\/1010\/image.png"
  },
  {
    "question":"Identify the question that Tamir's experiment can best answer.",
    "choices":[
      "Do more bacteria grow in liquid with cinnamon than in liquid without cinnamon?",
      "Does temperature affect how much bacteria can grow in liquid?"
    ],
    "answer":0,
    "hint":"The passage below describes an experiment. Read the passage and then follow the instructions below.\n\nTamir mixed bacteria into a nutrient-rich liquid where the bacteria could grow. He poured four ounces of the mixture into each of ten glass flasks. In five of the ten flasks, he also added one teaspoon of cinnamon. He allowed the bacteria in the flasks to grow overnight in a 37\u00b0C room. Then, Tamir used a microscope to count the number of bacteria in a small sample from each flask. He compared the amount of bacteria in the liquid with cinnamon to the amount of bacteria in the liquid without cinnamon.\nFigure: flasks of liquid for growing bacteria.",
    "image":"image.png",
    "task":"closed-choice",
    "grade":"grade7",
    "subject":"natural science",
    "topic":"science-and-engineering-practices",
    "category":"Designing experiments",
    "skill":"Identify the experimental question",
    "lecture":"Experiments can be designed to answer specific questions. How can you identify the questions that a certain experiment can answer? In order to do this, you need to figure out what was tested and what was measured during the experiment. Imagine an experiment with two groups of daffodil plants. One group of plants was grown in sandy soil, and the other was grown in clay soil. Then, the height of each plant was measured. First, identify the part of the experiment that was tested. The part of an experiment that is tested usually involves the part of the experimental setup that is different or changed. In the experiment described above, each group of plants was grown in a different type of soil. So, the effect of growing plants in different soil types was tested. Then, identify the part of the experiment that was measured. The part of the experiment that is measured may include measurements and calculations. In the experiment described above, the heights of the plants in each group were measured. Experiments can answer questions about how the part of the experiment that is tested affects the part that is measured. So, the experiment described above can answer questions about how soil type affects plant height. Examples of questions that this experiment can answer include: Does soil type affect the height of daffodil plants? Do daffodil plants in sandy soil grow taller than daffodil plants in clay soil? Are daffodil plants grown in sandy soil shorter than daffodil plants grown in clay soil?",
    "solution":null,
    "split":"val",
    "path":"https:\/\/scienceqa-webdemo.s3.us-west-1.amazonaws.com\/extra\/1013\/image.png"
  },
  {
    "question":"Identify the question that Maria and Desmond's experiment can best answer.",
    "choices":[
      "Does Maria's snowboard slide down a hill in less time when it has a thin layer of wax or a thick layer of wax?",
      "Does Maria's snowboard slide down a hill in less time when it has a layer of wax or when it does not have a layer of wax?"
    ],
    "answer":1,
    "hint":"The passage below describes an experiment. Read the passage and then follow the instructions below.\n\nMaria applied a thin layer of wax to the underside of her snowboard and rode the board straight down a hill. Then, she removed the wax and rode the snowboard straight down the hill again. She repeated the rides four more times, alternating whether she rode with a thin layer of wax on the board or not. Her friend Desmond timed each ride. Maria and Desmond calculated the average time it took to slide straight down the hill on the snowboard with wax compared to the average time on the snowboard without wax.\nFigure: snowboarding down a hill.",
    "image":"image.png",
    "task":"closed-choice",
    "grade":"grade8",
    "subject":"natural science",
    "topic":"science-and-engineering-practices",
    "category":"Designing experiments",
    "skill":"Identify the experimental question",
    "lecture":"Experiments can be designed to answer specific questions. How can you identify the questions that a certain experiment can answer? In order to do this, you need to figure out what was tested and what was measured during the experiment. Imagine an experiment with two groups of daffodil plants. One group of plants was grown in sandy soil, and the other was grown in clay soil. Then, the height of each plant was measured. First, identify the part of the experiment that was tested. The part of an experiment that is tested usually involves the part of the experimental setup that is different or changed. In the experiment described above, each group of plants was grown in a different type of soil. So, the effect of growing plants in different soil types was tested. Then, identify the part of the experiment that was measured. The part of the experiment that is measured may include measurements and calculations. In the experiment described above, the heights of the plants in each group were measured. Experiments can answer questions about how the part of the experiment that is tested affects the part that is measured. So, the experiment described above can answer questions about how soil type affects plant height. Examples of questions that this experiment can answer include: Does soil type affect the height of daffodil plants? Do daffodil plants in sandy soil grow taller than daffodil plants in clay soil? Are daffodil plants grown in sandy soil shorter than daffodil plants grown in clay soil?",
    "solution":null,
    "split":"val",
    "path":"https:\/\/scienceqa-webdemo.s3.us-west-1.amazonaws.com\/extra\/1033\/image.png"
  },
  {
    "question":"Which air temperature was measured within the outlined area shown?",
    "choices":[
      "32\u00b0C",
      "10\u00b0C",
      "5\u00b0C"
    ],
    "answer":0,
    "hint":"The map below shows air temperatures in the lower atmosphere on October 1, 2015. The outlined area shows an air mass that influenced weather in North America on that day.\nLook at the map. Then, answer the question below.\nData source: United States National Oceanic and Atmospheric Administration\/Earth System Research Laboratory, Physical Sciences Division",
    "image":"image.png",
    "task":"closed-choice",
    "grade":"grade6",
    "subject":"natural science",
    "topic":"earth-science",
    "category":"Weather and climate",
    "skill":"Identify and compare air masses",
    "lecture":"To study air masses, scientists can use maps that show conditions within Earth's atmosphere. For example, the map below uses color to show air temperatures. The map's legend tells you the temperature that each color represents. Colors on the left in the legend represent lower temperatures than colors on the right. For example, areas on the map that are the darkest shade of blue have a temperature from -25\u00b0C up to -20\u00b0C. Areas that are the next darkest shade of blue have a temperature from -20\u00b0C up to -15\u00b0C.",
    "solution":"Look at the colors shown within the outlined area. Then, use the legend to determine which air temperatures those colors represent.\nThe legend tells you that this air mass contained air with temperatures between 25\u00b0C and 35\u00b0C.\n32\u00b0C is within this range.\n5\u00b0C and 10\u00b0C are outside of this range.",
    "split":"val",
    "path":"https:\/\/scienceqa-webdemo.s3.us-west-1.amazonaws.com\/extra\/1036\/image.png"
  },
  {
    "question":"Which word would you find on a dictionary page with the following guide words?\ngiraffe - grade",
    "choices":[
      "glossy",
      "generally"
    ],
    "answer":0,
    "hint":null,
    "image":null,
    "task":"closed-choice",
    "grade":"grade6",
    "subject":"language science",
    "topic":"reference-skills",
    "category":"Reference skills",
    "skill":"Use guide words",
    "lecture":"Guide words appear on each page of a dictionary. They tell you the first word and last word on the page. The other words on the page come between the guide words in alphabetical order. To put words in alphabetical order, put them in order by their first letters. If the first letters are the same, look at the second letters. If the second letters are the same, look at the third letters, and so on. If one word is shorter, and there are no more letters to compare, then the shorter word comes first in alphabetical order. For example, be comes before bed.",
    "solution":"Put the words in alphabetical order.\nSince glossy is between the guide words giraffe - grade, it would be found on that page.",
    "split":"val",
    "path":null
  },
  {
    "question":"Will these magnets attract or repel each other?",
    "choices":[
      "attract",
      "repel"
    ],
    "answer":1,
    "hint":"Two magnets are placed as shown.",
    "image":"image.png",
    "task":"closed-choice",
    "grade":"grade5",
    "subject":"natural science",
    "topic":"physics",
    "category":"Magnets",
    "skill":"Identify magnets that attract or repel",
    "lecture":"Magnets can pull or push on other magnets without touching them. When magnets attract, they pull together. When magnets repel, they push apart. These pulls and pushes are called magnetic forces. Magnetic forces are strongest at the magnets' poles, or ends. Every magnet has two poles: a north pole (N) and a south pole (S). Here are some examples of magnets. Their poles are shown in different colors and labeled. Whether a magnet attracts or repels other magnets depends on the positions of its poles. If opposite poles are closest to each other, the magnets attract. The magnets in the pair below attract. If the same, or like, poles are closest to each other, the magnets repel. The magnets in both pairs below repel.",
    "solution":"To predict if these magnets will attract or repel, look at which poles are closest to each other.\nThe south pole of one magnet is closest to the south pole of the other magnet. Like poles repel. So, these magnets will repel each other.",
    "split":"val",
    "path":"https:\/\/scienceqa-webdemo.s3.us-west-1.amazonaws.com\/extra\/1040\/image.png"
  },
  {
    "question":"What do these two changes have in common?\nrust forming on a bicycle frame\ngrilling a hamburger",
    "choices":[
      "Both are caused by cooling.",
      "Both are only physical changes.",
      "Both are caused by heating.",
      "Both are chemical changes."
    ],
    "answer":3,
    "hint":null,
    "image":null,
    "task":"closed-choice",
    "grade":"grade7",
    "subject":"natural science",
    "topic":"chemistry",
    "category":"Chemical reactions",
    "skill":"Compare physical and chemical changes",
    "lecture":"Matter is made of very small particles called atoms. Atoms can be linked together by chemical bonds. When two or more atoms link together, they form a molecule. In a chemical change, the chemical bonds in the molecules break. The atoms then link together to form different molecules. The types of molecules in matter before and after a chemical change are always different. Some chemical changes are caused by heating or cooling. For example, burning a piece of paper is a chemical change caused by heating. As paper burns, paper molecules react with oxygen molecules in the air. This reaction breaks the chemical bonds in the molecules. The atoms then link together in a different way to form different molecules. For example, carbon dioxide molecules are formed when paper burns. In a physical change, chemical bonds do not break. The types of molecules in matter before and after a physical change are always the same. A change of state is a type of physical change. Changes of state can be caused by heating or cooling. For example, water vaporizing is a physical change that can be caused by heating. Liquid water and water vapor are made of the same type of matter: water. The law of conservation of mass says that all physical and chemical changes conserve mass. Conserve means to keep the same. So, the total mass before a physical or chemical change is equal to the total mass after the change.",
    "solution":"Step 1: Think about each change.\nRust forming on a bicycle frame is a chemical change. Oxygen in the air reacts with iron in the bicycle frame. The outside of the frame turns into a different type of matter called rust. Rust is reddish-brown and falls apart easily.\nGrilling a hamburger is a chemical change. Heat from the grill causes the matter in the meat to change. Cooked meat and raw meat are different types of matter.\nStep 2: Look at each answer choice.\nBoth are only physical changes.\nBoth changes are chemical changes. They are not physical changes.\nBoth are chemical changes.\nBoth changes are chemical changes. The type of matter before and after each change is different.\nBoth are caused by heating.\nCooking a hamburger is caused by heating. But rust forming on a bicycle frame is not.\nBoth are caused by cooling.\nNeither change is caused by cooling.",
    "split":"val",
    "path":null
  },
  {
    "question":"What do these two changes have in common?\nusing a large magnet to remove pieces of iron from a junkyard\nsewing an apron",
    "choices":[
      "Both are only physical changes.",
      "Both are chemical changes.",
      "Both are caused by heating.",
      "Both are caused by cooling."
    ],
    "answer":0,
    "hint":null,
    "image":null,
    "task":"closed-choice",
    "grade":"grade7",
    "subject":"natural science",
    "topic":"chemistry",
    "category":"Chemical reactions",
    "skill":"Compare physical and chemical changes",
    "lecture":"Matter is made of very small particles called atoms. Atoms can be linked together by chemical bonds. When two or more atoms link together, they form a molecule. In a chemical change, the chemical bonds in the molecules break. The atoms then link together to form different molecules. The types of molecules in matter before and after a chemical change are always different. Some chemical changes are caused by heating or cooling. For example, burning a piece of paper is a chemical change caused by heating. As paper burns, paper molecules react with oxygen molecules in the air. This reaction breaks the chemical bonds in the molecules. The atoms then link together in a different way to form different molecules. For example, carbon dioxide molecules are formed when paper burns. In a physical change, chemical bonds do not break. The types of molecules in matter before and after a physical change are always the same. A change of state is a type of physical change. Changes of state can be caused by heating or cooling. For example, water vaporizing is a physical change that can be caused by heating. Liquid water and water vapor are made of the same type of matter: water. The law of conservation of mass says that all physical and chemical changes conserve mass. Conserve means to keep the same. So, the total mass before a physical or chemical change is equal to the total mass after the change.",
    "solution":"Step 1: Think about each change.\nUsing a large magnet to remove pieces of iron from a junkyard is a physical change. Both the iron and the magnet are still made of the same type of matter as before.\nSewing an apron is a physical change. The fabric and thread that make up the apron get a new shape, but the type of matter in each of them does not change.\nStep 2: Look at each answer choice.\nBoth are only physical changes.\nBoth changes are physical changes. No new matter is created.\nBoth are chemical changes.\nBoth changes are physical changes. They are not chemical changes.\nBoth are caused by heating.\nNeither change is caused by heating.\nBoth are caused by cooling.\nNeither change is caused by cooling.",
    "split":"val",
    "path":null
  },
  {
    "question":"Is the air inside a balloon a solid, a liquid, or a gas?",
    "choices":[
      "a liquid",
      "a gas",
      "a solid"
    ],
    "answer":1,
    "hint":null,
    "image":"image.png",
    "task":"closed-choice",
    "grade":"grade3",
    "subject":"natural science",
    "topic":"physics",
    "category":"States of matter",
    "skill":"Classify matter as solid, liquid, or gas",
    "lecture":"Solid, liquid, and gas are states of matter. Matter is anything that takes up space. Matter can come in different states, or forms. When matter is a solid, it has a definite volume and a definite shape. So, a solid has a size and shape of its own. Some solids can be easily folded, bent, or broken. A piece of paper is a solid. Also, some solids are very small. A grain of sand is a solid. When matter is a liquid, it has a definite volume but not a definite shape. So, a liquid has a size of its own, but it does not have a shape of its own. Think about pouring juice from a bottle into a cup. The juice still takes up the same amount of space, but it takes the shape of the bottle. Some liquids do not pour as easily as others. Honey and milk are both liquids. But pouring honey takes more time than pouring milk. When matter is a gas, it does not have a definite volume or a definite shape. A gas expands, or gets bigger, until it completely fills a space. A gas can also get smaller if it is squeezed into a smaller space. Many gases are invisible. Air is a gas.",
    "solution":"The air inside a balloon is a gas. A gas expands to fill a space.\nThe air inside a balloon expands to fill all the space in the balloon. If the balloon pops, the air will expand to fill a much larger space.",
    "split":"val",
    "path":"https:\/\/scienceqa-webdemo.s3.us-west-1.amazonaws.com\/extra\/1057\/image.png"
  },
  {
    "question":"What is the volume of a test tube?",
    "choices":[
      "16 liters",
      "16 milliliters"
    ],
    "answer":1,
    "hint":"Select the better estimate.",
    "image":null,
    "task":"closed-choice",
    "grade":"grade4",
    "subject":"natural science",
    "topic":"units-and-measurement",
    "category":"Units and measurement",
    "skill":"Choose metric units of volume",
    "lecture":"Measurements are written with both a number and a unit. The unit comes after the number. The unit shows what the number means. Volume is a measurement of how much space something takes up. There are many different units of volume. When you are using metric units, volume may be written in units of milliliters or liters. There are 1,000 milliliters in 1 liter. So, 1 milliliter is much less than 1 liter. A raindrop has a volume of about 20 milliliters, while a large soda bottle has a volume of 2 liters. The flask shown here measures volumes up to 500 milliliters.",
    "solution":"The better estimate for the volume of a test tube is 16 milliliters.\n16 liters is too much.",
    "split":"val",
    "path":null
  },
  {
    "question":"Which text uses the word unique in its traditional sense?",
    "choices":[
      "Elise made all of her daughter's baby clothes by hand, including a unique hand-knitted romper that she designed herself.",
      "Elise wanted her daughter to have a unique name, so she browsed baby name websites for months to find the perfect one."
    ],
    "answer":0,
    "hint":null,
    "image":null,
    "task":"closed-choice",
    "grade":"grade9",
    "subject":"language science",
    "topic":"writing-strategies",
    "category":"Word usage and nuance",
    "skill":"Explore words with new or contested usages",
    "lecture":"Words change in meaning when speakers begin using them in new ways. For example, the word peruse once only meant to examine in detail, but it's now also commonly used to mean to look through in a casual manner. When a word changes in meaning, its correct usage is often debated. Although a newer sense of the word may be more commonly used, many people consider a word's traditional definition to be the correct usage. Being able to distinguish the different uses of a word can help you use it appropriately for different audiences. Britney perused her notes, carefully preparing for her exam. The traditional usage above is considered more standard. David perused the magazine, absentmindedly flipping through the pages. The nontraditional usage above is now commonly used, but traditional style guides generally advise against it.",
    "solution":"The first text uses unique in its traditional sense: being the only one of its kind.\nElise made all of her daughter's baby clothes by hand, including a unique hand-knitted romper that she designed herself.\nThe second text uses unique in its nontraditional sense: interesting or unusual. Elise may have been looking for an unusual name, but if she found it on a baby name website, it is not actually one of a kind.\nElise wanted her daughter to have a unique name, so she browsed baby name websites for months to find the perfect one.\nMost style guides recommend to use the traditional sense of the word unique because it is considered more standard.",
    "split":"val",
    "path":null
  },
  {
    "question":"Think about the magnetic force between the magnets in each pair. Which of the following statements is true?",
    "choices":[
      "The magnitude of the magnetic force is the same in both pairs.",
      "The magnitude of the magnetic force is smaller in Pair 2.",
      "The magnitude of the magnetic force is smaller in Pair 1."
    ],
    "answer":0,
    "hint":"The images below show two pairs of magnets. The magnets in different pairs do not affect each other. All the magnets shown are made of the same material.",
    "image":"image.png",
    "task":"closed-choice",
    "grade":"grade5",
    "subject":"natural science",
    "topic":"physics",
    "category":"Magnets",
    "skill":"Compare magnitudes of magnetic forces",
    "lecture":"Magnets can pull or push on each other without touching. When magnets attract, they pull together. When magnets repel, they push apart. These pulls and pushes between magnets are called magnetic forces. The strength of a force is called its magnitude. The greater the magnitude of the magnetic force between two magnets, the more strongly the magnets attract or repel each other.",
    "solution":"Both magnet sizes and distance affect the magnitude of the magnetic force. The sizes of the magnets in Pair 1 are the same as in Pair 2. The distance between the magnets is also the same.\nSo, the magnitude of the magnetic force is the same in both pairs.",
    "split":"val",
    "path":"https:\/\/scienceqa-webdemo.s3.us-west-1.amazonaws.com\/extra\/1071\/image.png"
  },
  {
    "question":"Which is a compound sentence?",
    "choices":[
      "The average American eats three pounds of sugar each week.",
      "Mike grew too many pumpkins, so he sold the extras at the market."
    ],
    "answer":1,
    "hint":null,
    "image":null,
    "task":"closed-choice",
    "grade":"grade4",
    "subject":"language science",
    "topic":"grammar",
    "category":"Sentences, fragments, and run-ons",
    "skill":"Is the sentence simple or compound?",
    "lecture":"A simple sentence is a sentence with only one subject and predicate. The pitcher threw the ball to first base. A compound sentence is two simple sentences joined by a comma and a conjunction such as and, but, or, or so. The pitcher threw the ball, and the batter hit it. Some simple sentences have a compound subject or a compound predicate, but they are not compound sentences. Anna and James will watch the fireworks tonight. This simple sentence has a compound subject, Anna and James. The singers bowed and walked off the stage. This simple sentence has a compound predicate, bowed and walked off the stage. Some simple sentences have introductory phrases, but they are not compound sentences. The introductory phrase is part of the predicate. In the winter, Farmer Ben wears his heavy coat. This is a simple sentence. There is one subject, Farmer Ben, and one predicate, wears his heavy coat in the winter.",
    "solution":"The second sentence is the compound sentence. It is made up of two simple sentences joined by a comma and the conjunction so.\nMike grew too many pumpkins, so he sold the extras at the market.",
    "split":"val",
    "path":null
  },
  {
    "question":"What is the capital of Pennsylvania?",
    "choices":[
      "Harrisburg",
      "Providence",
      "Boston",
      "Montpelier"
    ],
    "answer":0,
    "hint":null,
    "image":"image.png",
    "task":"closed-choice",
    "grade":"grade3",
    "subject":"social science",
    "topic":"geography",
    "category":"State capitals",
    "skill":"Identify state capitals of the Northeast",
    "lecture":null,
    "solution":"Harrisburg is the capital of Pennsylvania.",
    "split":"val",
    "path":"https:\/\/scienceqa-webdemo.s3.us-west-1.amazonaws.com\/extra\/1077\/image.png"
  },
  {
    "question":"Based on this information, what is Thor's genotype for the coat pattern gene?",
    "choices":[
      "a black coat",
      "AA"
    ],
    "answer":1,
    "hint":"In a group of jaguars, some individuals have a black coat and others have a spotted coat. In this group, the gene for the coat pattern trait has two alleles. The allele A is for a black coat, and the allele a is for a spotted coat.\nThor, a jaguar from this group, has a black coat. Thor has two alleles for a black coat.",
    "image":null,
    "task":"closed-choice",
    "grade":"grade7",
    "subject":"natural science",
    "topic":"biology",
    "category":"Genes to traits",
    "skill":"Genetics vocabulary: genotype and phenotype",
    "lecture":"All organisms have pieces of hereditary material called genes, which are passed from parents to offspring. Genes contain instructions for building the parts of an organism. An organism's genes affect its observable traits, including its appearance, its behavior, and which diseases it may have. Genes may have different alleles, or forms, that can cause different versions of a trait. For example, flower color is a trait in pea plants. The gene for this trait has two possible alleles. Each allele is represented by an uppercase or lowercase letter. The allele F is for purple flowers, and the allele f is for white flowers. Each pea plant has two alleles for the flower color gene\u2014one allele inherited from each parent. An organism's genotype for a gene is its combination of alleles for that gene. So, a pea plant may have a genotype of FF, Ff, or ff for the flower color gene. An organism's phenotype for a trait is its observable version of that trait, which depends on the organism's combination of alleles. A pea plant may have a phenotype of purple flowers or white flowers for the flower color trait.",
    "solution":"An organism's genotype for a gene is its combination of alleles for that gene. Thor has two alleles for a black coat (A). So, Thor's genotype for the coat pattern gene is AA.",
    "split":"val",
    "path":null
  },
  {
    "question":"Which of these states is farthest east?",
    "choices":[
      "Florida",
      "New York",
      "New Hampshire",
      "Iowa"
    ],
    "answer":2,
    "hint":null,
    "image":"image.png",
    "task":"closed-choice",
    "grade":"grade2",
    "subject":"social science",
    "topic":"geography",
    "category":"Geography",
    "skill":"Read a map: cardinal directions",
    "lecture":"Maps have four cardinal directions, or main directions. Those directions are north, south, east, and west. A compass rose is a set of arrows that point to the cardinal directions. A compass rose usually shows only the first letter of each cardinal direction. The north arrow points to the North Pole. On most maps, north is at the top of the map.",
    "solution":"To find the answer, look at the compass rose. Look at which way the east arrow is pointing. New Hampshire is farthest east.",
    "split":"val",
    "path":"https:\/\/scienceqa-webdemo.s3.us-west-1.amazonaws.com\/extra\/1100\/image.png"
  },
  {
    "question":"What evidence of erosion does this picture show?",
    "choices":[
      "The rocks in the canyon have a reddish color.",
      "There is a canyon with steep walls."
    ],
    "answer":1,
    "hint":"Erosion is what happens when loose pieces of rock are carried away by water, wind, or ice.\nThis is a picture of Antelope Canyon. Antelope Canyon was formed as a result of erosion over thousands of years.",
    "image":"image.png",
    "task":"closed-choice",
    "grade":"grade2",
    "subject":"natural science",
    "topic":"earth-science",
    "category":"Earth events",
    "skill":"Find evidence of changes to Earth's surface",
    "lecture":"Evidence is information that tells you something happened. How do you look for evidence of a change to Earth's surface? There are many ways to find evidence of a change to Earth's surface. One way is to look at a picture that was taken after the change. Here are some examples of what the evidence for different changes might be: <br\/><br\/> Cause of the change | Evidence of the change<br\/> earthquake | cracks in the ground; houses with broken walls and roofs<br\/> volcanic eruption | melted rock on Earth's surface; smoke coming out of a hole in the ground<br\/> erosion | a canyon with a river flowing through it; a river carrying sand and mud<br\/> <br\/> Be careful when you are looking for evidence! A picture of Earth's surface can contain a lot of information. Some of that information might be evidence of a change to the surface, but some of it is not! For example, a picture taken after an earthquake might show a blue sky. But the color of the sky is not evidence of an earthquake. So, that information is not evidence that an earthquake happened.",
    "solution":null,
    "split":"val",
    "path":"https:\/\/scienceqa-webdemo.s3.us-west-1.amazonaws.com\/extra\/1102\/image.png"
  },
  {
    "question":"Would you find the word direction on a dictionary page with the following guide words?\ndo - duty",
    "choices":[
      "yes",
      "no"
    ],
    "answer":1,
    "hint":null,
    "image":null,
    "task":"yes-or-no",
    "grade":"grade2",
    "subject":"language science",
    "topic":"reference-skills",
    "category":"Reference skills",
    "skill":"Use guide words",
    "lecture":"Guide words appear on each page of a dictionary. They tell you the first word and last word on the page. The other words on the page come between the guide words in alphabetical order. To put words in alphabetical order, put them in order by their first letters. If the first letters are the same, look at the second letters. If the second letters are the same, look at the third letters, and so on.",
    "solution":"Put the words in alphabetical order.\nSince direction is not between the guide words do - duty, it would not be found on that page.",
    "split":"val",
    "path":null
  },
  {
    "question":"Which is a compound sentence?",
    "choices":[
      "I had an old token for my subway fare, but the new system only accepts paper fare cards.",
      "Open and honest communication is the foundation of a healthy relationship."
    ],
    "answer":0,
    "hint":null,
    "image":null,
    "task":"closed-choice",
    "grade":"grade5",
    "subject":"language science",
    "topic":"grammar",
    "category":"Sentences, fragments, and run-ons",
    "skill":"Is the sentence simple, compound, or complex?",
    "lecture":"A clause is a group of words that contains both a subject and a predicate. An independent clause is a complete thought. It can stand alone as a sentence. A dependent clause is not a complete thought. It cannot stand alone as a sentence. the oranges on our tree are ripe The clause can stand alone. It is independent. after we pick up Kevin from work The clause cannot stand alone. It is dependent. A simple sentence is made up of a single independent clause. Ben and I spent all day relaxing by the pool. Some simple sentences have introductory phrases, but the introductory phrase is part of the predicate. In the winter, Ben usually wears his heavy coat. Ben usually wears his heavy coat in the winter. A compound sentence is made up of two independent clauses joined by a coordinating conjunction such as and, but, or, or so. We saw a flash of lightning, and seconds later we heard the rumble of thunder. A complex sentence is made up of an independent clause and a dependent clause. The dependent clause usually begins with a subordinating conjunction such as after, although, as, because, before, if, since, unless, until, when, or while. If she ever gets the chance, Terri would love to visit the Egyptian pyramids.",
    "solution":"The first sentence is the compound sentence. It is made up of two independent clauses joined by the coordinating conjunction but.\nI had an old token for my subway fare, but the new system only accepts paper fare cards.",
    "split":"val",
    "path":null
  },
  {
    "question":"Think about the magnetic force between the magnets in each pair. Which of the following statements is true?",
    "choices":[
      "The strength of the magnetic force is the same in both pairs.",
      "The magnetic force is weaker in Pair 2.",
      "The magnetic force is weaker in Pair 1."
    ],
    "answer":1,
    "hint":"The images below show two pairs of magnets. The magnets in different pairs do not affect each other. All the magnets shown are made of the same material.",
    "image":"image.png",
    "task":"closed-choice",
    "grade":"grade3",
    "subject":"natural science",
    "topic":"physics",
    "category":"Magnets",
    "skill":"Compare strengths of magnetic forces",
    "lecture":"Magnets can pull or push on each other without touching. When magnets attract, they pull together. When magnets repel, they push apart. These pulls and pushes between magnets are called magnetic forces. The stronger the magnetic force between two magnets, the more strongly the magnets attract or repel each other. You can change the strength of a magnetic force between two magnets by changing the distance between them. The magnetic force is weaker when the magnets are farther apart.",
    "solution":"Distance affects the strength of the magnetic force. When magnets are farther apart, the magnetic force between them is weaker.\nThe magnets in Pair 2 are farther apart than the magnets in Pair 1. So, the magnetic force is weaker in Pair 2 than in Pair 1.",
    "split":"val",
    "path":"https:\/\/scienceqa-webdemo.s3.us-west-1.amazonaws.com\/extra\/1124\/image.png"
  },
  {
    "question":"Which is this organism's common name?",
    "choices":[
      "Fromia monilis",
      "necklace sea star"
    ],
    "answer":1,
    "hint":"This organism is Fromia monilis. It is also called a necklace sea star.",
    "image":"image.png",
    "task":"closed-choice",
    "grade":"grade7",
    "subject":"natural science",
    "topic":"biology",
    "category":"Classification and scientific names",
    "skill":"Identify common and scientific names",
    "lecture":"An organism's common name is the name that people normally call the organism. Common names often contain words you know. An organism's scientific name is the name scientists use to identify the organism. Scientific names often contain words that are not used in everyday English. Scientific names are written in italics, but common names are usually not. The first word of the scientific name is capitalized, and the second word is not. For example, the common name of the animal below is giant panda. Its scientific name is Ailuropoda melanoleuca.",
    "solution":"Fromia monilis is written in italics. The first word is capitalized, and the second word is not. So, it is the scientific name.\nFromia monilis is the organism's scientific name. So, you know that necklace sea star is the common name.",
    "split":"val",
    "path":"https:\/\/scienceqa-webdemo.s3.us-west-1.amazonaws.com\/extra\/1136\/image.png"
  },
  {
    "question":"Select the one substance that is not a mineral.",
    "choices":[
      "Wood is not a pure substance. It is formed in nature.",
      "Native gold is a solid. It is not made by living things.",
      "Baryte is a pure substance. It is not made by living things."
    ],
    "answer":0,
    "hint":null,
    "image":null,
    "task":"closed-choice",
    "grade":"grade4",
    "subject":"natural science",
    "topic":"earth-science",
    "category":"Rocks and minerals",
    "skill":"Identify minerals using properties",
    "lecture":"Minerals are the building blocks of rocks. A rock can be made of one or more minerals. Minerals and rocks have the following properties: <br\/><br\/> Property | Mineral | Rock<br\/> It is a solid. | Yes | Yes<br\/> It is formed in nature. | Yes | Yes<br\/> It is not made by organisms. | Yes | Yes<br\/> It is a pure substance. | Yes | No<br\/> It has a fixed crystal structure. | Yes | No<br\/> <br\/> You can use these properties to tell whether a substance is a mineral, a rock, or neither. Look closely at the last three properties: Minerals and rocks are not made by organisms. Organisms make their own body parts. For example, snails and clams make their shells. Because they are made by organisms, body parts cannot be  minerals or rocks. Humans are organisms too. So, substances that humans make by hand or in factories are not minerals or rocks. A mineral is a pure substance, but a rock is not. A pure substance is made of only one type of matter.  Minerals are pure substances, but rocks are not. Instead, all rocks are mixtures. A mineral has a fixed crystal structure, but a rock does not. The crystal structure of a substance tells you how the atoms or molecules in the substance are arranged. Different types of minerals have different crystal structures, but all minerals have a fixed crystal structure. This means that the atoms and molecules in different pieces of the same type of mineral are always arranged the same way. However, rocks do not have a fixed crystal structure. So, the arrangement of atoms or molecules in different pieces of the same type of rock may be different!",
    "solution":"Compare the properties of each substance to the properties of minerals. Select the substance whose properties do not match those of minerals.\nNative gold is a mineral.\nBaryte is a mineral.\nWood is not a pure substance. But all minerals are pure substances.\nSo, wood is not a mineral.",
    "split":"val",
    "path":null
  },
  {
    "question":"Which month has the lowest average precipitation in London?",
    "choices":[
      "May",
      "July",
      "February"
    ],
    "answer":1,
    "hint":"Use the graph to answer the question below.",
    "image":"image.png",
    "task":"closed-choice",
    "grade":"grade4",
    "subject":"natural science",
    "topic":"earth-science",
    "category":"Weather and climate",
    "skill":"Use climate data to make predictions",
    "lecture":"Scientists record climate data from places around the world. Precipitation, or rain and snow, is one type of climate data. Scientists collect data over many years. They can use this data to calculate the average precipitation for each month. The average precipitation can be used to describe the climate of a location. A bar graph can be used to show the average amount of precipitation each month. Months with taller bars have more precipitation on average.",
    "solution":"To describe the average precipitation trends in London, look at the graph.\nChoice \"Feb\" is incorrect.\nChoice \"May\" is incorrect.\nChoice \"Jul\" is incorrect.\nJuly has an average monthly precipitation of about 45 millimeters. This is lower than in any other month. So, July has the lowest average precipitation.",
    "split":"val",
    "path":"https:\/\/scienceqa-webdemo.s3.us-west-1.amazonaws.com\/extra\/1149\/image.png"
  },
  {
    "question":"Compare the average kinetic energies of the particles in each sample. Which sample has the higher temperature?",
    "choices":[
      "sample B",
      "sample A",
      "neither; the samples have the same temperature"
    ],
    "answer":0,
    "hint":"The diagrams below show two pure samples of gas in identical closed, rigid containers. Each colored ball represents one gas particle. Both samples have the same number of particles.",
    "image":"image.png",
    "task":"closed-choice",
    "grade":"grade7",
    "subject":"natural science",
    "topic":"physics",
    "category":"Particle motion and energy",
    "skill":"Identify how particle motion affects temperature and pressure",
    "lecture":"The temperature of a substance depends on the average kinetic energy of the particles in the substance. The higher the average kinetic energy of the particles, the higher the temperature of the substance. The kinetic energy of a particle is determined by its mass and speed. For a pure substance, the greater the mass of each particle in the substance and the higher the average speed of the particles, the higher their average kinetic energy.",
    "solution":"Each particle in sample B has more mass than each particle in sample A. The particles in sample B also have a higher average speed than the particles in sample A. So, the particles in sample B have a higher average kinetic energy than the particles in sample A.\nBecause the particles in sample B have the higher average kinetic energy, sample B must have the higher temperature.",
    "split":"val",
    "path":"https:\/\/scienceqa-webdemo.s3.us-west-1.amazonaws.com\/extra\/1152\/image.png"
  },
  {
    "question":"Which of these states is farthest east?",
    "choices":[
      "Wyoming",
      "Kansas",
      "Michigan",
      "Washington"
    ],
    "answer":2,
    "hint":null,
    "image":"image.png",
    "task":"closed-choice",
    "grade":"grade4",
    "subject":"social science",
    "topic":"geography",
    "category":"Maps",
    "skill":"Read a map: cardinal directions",
    "lecture":"Maps have four cardinal directions, or main directions. Those directions are north, south, east, and west. A compass rose is a set of arrows that point to the cardinal directions. A compass rose usually shows only the first letter of each cardinal direction. The north arrow points to the North Pole. On most maps, north is at the top of the map.",
    "solution":"To find the answer, look at the compass rose. Look at which way the east arrow is pointing. Michigan is farthest east.",
    "split":"val",
    "path":"https:\/\/scienceqa-webdemo.s3.us-west-1.amazonaws.com\/extra\/1159\/image.png"
  },
  {
    "question":"Select the organism in the same species as the European nightjar.",
    "choices":[
      "Lepus europaeus",
      "Caprimulgus europaeus",
      "Tyto alba"
    ],
    "answer":1,
    "hint":"This organism is a European nightjar. Its scientific name is Caprimulgus europaeus.",
    "image":"image.png",
    "task":"closed-choice",
    "grade":"grade7",
    "subject":"natural science",
    "topic":"biology",
    "category":"Classification and scientific names",
    "skill":"Use scientific names to classify organisms",
    "lecture":"Scientists use scientific names to identify organisms. Scientific names are made of two words. The first word in an organism's scientific name tells you the organism's genus. A genus is a group of organisms that share many traits. A genus is made up of one or more species. A species is a group of very similar organisms. The second word in an organism's scientific name tells you its species within its genus. Together, the two parts of an organism's scientific name identify its species. For example Ursus maritimus and Ursus americanus are two species of bears. They are part of the same genus, Ursus. But they are different species within the genus. Ursus maritimus has the species name maritimus. Ursus americanus has the species name americanus. Both bears have small round ears and sharp claws. But Ursus maritimus has white fur and Ursus americanus has black fur.",
    "solution":"A European nightjar's scientific name is Caprimulgus europaeus.\nTyto alba does not have the same scientific name as a European nightjar. So, Caprimulgus europaeus and Tyto alba are not in the same species.\nLepus europaeus does have the same species within its genus as a European nightjar, but they are not in the same genus! They do not have the same scientific name as each other. So, these organisms are not in the same species.\nCaprimulgus europaeus has the same scientific name as a European nightjar. So, these organisms are in the same species.",
    "split":"val",
    "path":"https:\/\/scienceqa-webdemo.s3.us-west-1.amazonaws.com\/extra\/1162\/image.png"
  },
  {
    "question":"Which text message is more formal?",
    "choices":[
      "Ms. Wyatt is already here. She's waiting in the lobby.",
      "Heads up! Wyatt is here. In the lobby."
    ],
    "answer":0,
    "hint":null,
    "image":null,
    "task":"closed-choice",
    "grade":"grade10",
    "subject":"language science",
    "topic":"writing-strategies",
    "category":"Audience, purpose, and tone",
    "skill":"Which text is most formal?",
    "lecture":"Informal writing is typically used in casual situations or when communicating with someone you know well. Informal language often expresses familiarity and tends to sound more like speech. It uses more conversational language, such as slang, idioms, abbreviations, imprecise language, and contractions. Formal writing is typically used in academic and business writing or when writing directly to an authority figure. It tends to be more courteous and impersonal, avoiding overly familiar or conversational language. Compare the following sentences. Informal: Yeah, ostriches can't fly, but I think they're awesome. More formal: Ostriches may be flightless, but they're remarkable runners. Most formal: Though flightless, ostriches are remarkable runners.",
    "solution":"The first text message is more formal. It uses complete sentences, avoids slang (heads up), and uses the person's title (Ms. Wyatt). The other text message includes more casual language and sentence fragments.",
    "split":"val",
    "path":null
  },
  {
    "question":"Which animal's skin is better adapted to hurt an attacking predator?",
    "choices":[
      "porcupine",
      "lesser bushbaby"
    ],
    "answer":0,
    "hint":"Thorny devils have sharp spines covering much of their skin. The skin of the  is adapted to hurt an attacking predator.\nFigure: thorny devil.",
    "image":"image.png",
    "task":"closed-choice",
    "grade":"grade5",
    "subject":"natural science",
    "topic":"biology",
    "category":"Adaptations",
    "skill":"Animal adaptations: skins and body coverings",
    "lecture":"An adaptation is an inherited trait that helps an organism survive or reproduce. Adaptations can include both body parts and behaviors. The color, texture, and covering of an animal's skin are examples of adaptations. Animals' skins can be adapted in different ways. For example, skin with thick fur might help an animal stay warm. Skin with sharp spines might help an animal defend itself against predators.",
    "solution":"Look at the picture of the thorny devil.\nThe thorny devil has sharp spines on its skin. Its skin is adapted to hurt an attacking predator. The spines can harm a predator that tries to bite the thorny devil.\nNow look at each animal. Figure out which animal has a similar adaptation.\nThe porcupine has sharp spines on its skin. Its skin is adapted to hurt an attacking predator.\nThe lesser bushbaby has soft fur covering its skin. Its skin is not adapted for hurting an attacking predator.",
    "split":"val",
    "path":"https:\/\/scienceqa-webdemo.s3.us-west-1.amazonaws.com\/extra\/1177\/image.png"
  },
  {
    "question":"Which figure of speech is used in this text?\nI've heard that Christine & Co. is downsizing, so I'm happy to see that their store in downtown Greenville will remain open for now.",
    "choices":[
      "euphemism",
      "apostrophe"
    ],
    "answer":0,
    "hint":null,
    "image":null,
    "task":"closed-choice",
    "grade":"grade12",
    "subject":"language science",
    "topic":"figurative-language",
    "category":"Literary devices",
    "skill":"Classify the figure of speech: review",
    "lecture":"Figures of speech are words or phrases that use language in a nonliteral or unusual way. They can make writing more expressive. Anaphora is the repetition of the same word or words at the beginning of several phrases or clauses. We are united. We are powerful. We are winners. Antithesis involves contrasting opposing ideas within a parallel grammatical structure. I want to help, not to hurt. Apostrophe is a direct address to an absent person or a nonhuman entity. Oh, little bird, what makes you sing so beautifully? Assonance is the repetition of a vowel sound in a series of nearby words. Try to light the fire. Chiasmus is an expression in which the second half parallels the first but reverses the order of words. Never let a fool kiss you or a kiss fool you. A euphemism is a polite or indirect expression that is used to de-emphasize an unpleasant topic. The head of Human Resources would never refer to firing people, only to laying them off. Hyperbole is an obvious exaggeration that is not meant to be taken literally. I ate so much that I think I might explode! An oxymoron is a joining of two seemingly contradictory terms. Some reviewers are calling this book a new classic. A paradox is a statement that might at first appear to be contradictory, but that may in fact contain some truth. Always expect the unexpected. Understatement involves deliberately representing something as less serious or important than it really is. As you know, it can get a little cold in the Antarctic.",
    "solution":"The text uses a euphemism, a polite or indirect expression that is used to de-emphasize an unpleasant topic.\nDownsizing is an indirect way of saying that the company is planning on firing employees, closing shops or branches, and\/or reducing its budget.",
    "split":"val",
    "path":null
  },
  {
    "question":"Which animal's neck is also adapted for reaching high branches?",
    "choices":[
      "chital",
      "bison"
    ],
    "answer":0,
    "hint":"Gerenuk eat leaves and twigs. The 's neck is adapted for reaching branches that are high above the ground.\nFigure: gerenuk.",
    "image":"image.png",
    "task":"closed-choice",
    "grade":"grade5",
    "subject":"natural science",
    "topic":"biology",
    "category":"Adaptations",
    "skill":"Animal adaptations: beaks, mouths, and necks",
    "lecture":"An adaptation is an inherited trait that helps an organism survive or reproduce. Adaptations can include both body parts and behaviors. The shape of an animal's neck is one example of an adaptation. Animals' necks can be adapted in different ways. For example, a large frilled neck might help an animal appear dangerous to its predators. A long neck might help an animal get food from tall trees.",
    "solution":"Look at the picture of the gerenuk.\nNow look at each animal. Figure out which animal has a similar adaptation.\nThe chital has a long neck. Its neck is adapted for reaching high branches.\nThe bison has a short neck. Its neck is not adapted for reaching high branches. The bison eats mostly grass.",
    "split":"val",
    "path":"https:\/\/scienceqa-webdemo.s3.us-west-1.amazonaws.com\/extra\/1182\/image.png"
  },
  {
    "question":"Compare the motion of two birds. Which bird was moving at a higher speed?",
    "choices":[
      "a bird that moved 25kilometers in 5hours",
      "a bird that moved 15kilometers in 5hours"
    ],
    "answer":0,
    "hint":null,
    "image":null,
    "task":"closed-choice",
    "grade":"grade2",
    "subject":"natural science",
    "topic":"physics",
    "category":"Force and motion",
    "skill":"Compare the speeds of moving objects",
    "lecture":"An object's speed tells you how fast the object is moving. Speed depends on both distance and time. Distance tells you how far the object has moved. One unit used to measure distance is the kilometer. Time tells you how long the object has spent moving. One unit used to measure time is the hour. Think about two objects moving for the same amount of time. The object that is moving faster will go a farther distance in that time. It is moving at a higher speed.",
    "solution":"Look at the distance each bird moved and the time it took to move that distance.\nOne bird moved 25 kilometers in 5 hours.\nThe other bird moved 15 kilometers in 5 hours.\nNotice that each bird spent the same amount of time moving. The bird that moved 25 kilometers moved a farther distance in that time. So, that bird must have moved at a higher speed.",
    "split":"val",
    "path":null
  },
  {
    "question":"Which ocean is highlighted?",
    "choices":[
      "the Arctic Ocean",
      "the Atlantic Ocean",
      "the Pacific Ocean",
      "the Southern Ocean"
    ],
    "answer":0,
    "hint":null,
    "image":"image.png",
    "task":"closed-choice",
    "grade":"grade6",
    "subject":"social science",
    "topic":"geography",
    "category":"Physical Geography",
    "skill":"Oceans and continents",
    "lecture":"Oceans are huge bodies of salt water. The world has five oceans. All of the oceans are connected, making one world ocean.",
    "solution":"This is the Arctic Ocean.",
    "split":"val",
    "path":"https:\/\/scienceqa-webdemo.s3.us-west-1.amazonaws.com\/extra\/1191\/image.png"
  },
  {
    "question":"Which word would you find on a dictionary page with the following guide words?\npage - pie",
    "choices":[
      "peek",
      "proud"
    ],
    "answer":0,
    "hint":null,
    "image":null,
    "task":"closed-choice",
    "grade":"grade2",
    "subject":"language science",
    "topic":"reference-skills",
    "category":"Reference skills",
    "skill":"Use guide words",
    "lecture":"Guide words appear on each page of a dictionary. They tell you the first word and last word on the page. The other words on the page come between the guide words in alphabetical order. To put words in alphabetical order, put them in order by their first letters. If the first letters are the same, look at the second letters. If the second letters are the same, look at the third letters, and so on.",
    "solution":"Put the words in alphabetical order.\nSince peek is between the guide words page - pie, it would be found on that page.",
    "split":"val",
    "path":null
  },
  {
    "question":"Think about the magnetic force between the magnets in each pair. Which of the following statements is true?",
    "choices":[
      "The magnitude of the magnetic force is smaller in Pair 1.",
      "The magnitude of the magnetic force is smaller in Pair 2.",
      "The magnitude of the magnetic force is the same in both pairs."
    ],
    "answer":2,
    "hint":"The images below show two pairs of magnets. The magnets in different pairs do not affect each other. All the magnets shown are made of the same material, but some of them are different shapes.",
    "image":"image.png",
    "task":"closed-choice",
    "grade":"grade6",
    "subject":"natural science",
    "topic":"physics",
    "category":"Velocity, acceleration, and forces",
    "skill":"Compare magnitudes of magnetic forces",
    "lecture":"Magnets can pull or push on each other without touching. When magnets attract, they pull together. When magnets repel, they push apart. These pulls and pushes between magnets are called magnetic forces. The strength of a force is called its magnitude. The greater the magnitude of the magnetic force between two magnets, the more strongly the magnets attract or repel each other.",
    "solution":"The magnets in Pair 2 attract. The magnets in Pair 1 repel. But whether the magnets attract or repel affects only the direction of the magnetic force. It does not affect the magnitude of the magnetic force.\nBoth magnet sizes and distance affect the magnitude of the magnetic force. The sizes of the magnets in Pair 1 are the same as in Pair 2. The distance between the magnets is also the same.\nSo, the magnitude of the magnetic force is the same in both pairs.",
    "split":"val",
    "path":"https:\/\/scienceqa-webdemo.s3.us-west-1.amazonaws.com\/extra\/1196\/image.png"
  },
  {
    "question":"What is the volume of a blender?",
    "choices":[
      "60 gallons",
      "60 cups",
      "60 fluid ounces"
    ],
    "answer":2,
    "hint":"Select the best estimate.",
    "image":null,
    "task":"closed-choice",
    "grade":"grade4",
    "subject":"natural science",
    "topic":"units-and-measurement",
    "category":"Units and measurement",
    "skill":"Choose customary units of volume",
    "lecture":"Measurements are written with both a number and a unit. The unit comes after the number. The unit shows what the number means. Volume is a measurement of how much space something takes up. There are many different units of volume. When you are using customary units, volume may be written in units of fluid ounces, cups, or gallons. As the diagram shows, there are 8 fluid ounces in 1 cup and 16 cups in 1 gallon. So, 1 fluid ounce is less than 1 cup and much less than 1 gallon. A glass of milk has a volume of about 8 fluid ounces, or 1 cup. A jug of milk has a volume of 1 gallon.",
    "solution":"The best estimate for the volume of a blender is 60 fluid ounces.\n60 cups and 60 gallons are both too much.",
    "split":"val",
    "path":null
  },
  {
    "question":"What do these two changes have in common?\nmilk going sour\nroasting a marshmallow over a campfire",
    "choices":[
      "Both are chemical changes.",
      "Both are caused by cooling.",
      "Both are caused by heating.",
      "Both are only physical changes."
    ],
    "answer":0,
    "hint":null,
    "image":null,
    "task":"closed-choice",
    "grade":"grade4",
    "subject":"natural science",
    "topic":"chemistry",
    "category":"Physical and chemical change",
    "skill":"Compare physical and chemical changes",
    "lecture":"Chemical changes and physical changes are two common ways matter can change. In a chemical change, the type of matter changes. The types of matter before and after a chemical change are always different. Some chemical changes are caused by heating or cooling. For example, burning a piece of paper is a chemical change caused by heating. When paper gets hot enough, it re\u00adacts with oxygen in the air and burns. The paper and oxygen change into ash and smoke. In a physical change, the type of matter stays the same. The types of matter before and after a physical change are always the same. A change of state is a type of physical change. Changes of state can be caused by heating or cooling. For example, ice melting is a physical change that can be caused by heating. Ice and liquid water are made of the same type of matter: water. The law of conservation of mass says that all physical and chemical changes conserve mass. Conserve means to keep the same. So, the total mass before a physical or chemical change is equal to the total mass after the change.",
    "solution":"Step 1: Think about each change.\nMilk going sour is a chemical change. The type of matter in the milk slowly changes. The new matter that is formed gives the milk its sour taste.\nRoasting a marshmallow is a chemical change. The type of matter on the outside of the marshmallow changes. As a marshmallow is roasted, it turns brown and crispy.\nStep 2: Look at each answer choice.\nBoth are only physical changes.\nBoth changes are chemical changes. They are not physical changes.\nBoth are chemical changes.\nBoth changes are chemical changes. The type of matter before and after each change is different.\nBoth are caused by heating.\nRoasting is caused by heating. But milk going sour is not.\nBoth are caused by cooling.\nNeither change is caused by cooling.",
    "split":"val",
    "path":null
  },
  {
    "question":"What is the capital of Oregon?",
    "choices":[
      "Santa Fe",
      "Salem",
      "Portland",
      "Denver"
    ],
    "answer":1,
    "hint":null,
    "image":"image.png",
    "task":"closed-choice",
    "grade":"grade4",
    "subject":"social science",
    "topic":"geography",
    "category":"State capitals",
    "skill":"Identify state capitals of the West",
    "lecture":null,
    "solution":"Salem is the capital of Oregon.",
    "split":"val",
    "path":"https:\/\/scienceqa-webdemo.s3.us-west-1.amazonaws.com\/extra\/1213\/image.png"
  },
  {
    "question":"Which property matches this object?",
    "choices":[
      "sweet",
      "bouncy"
    ],
    "answer":0,
    "hint":"Select the better answer.",
    "image":"image.png",
    "task":"closed-choice",
    "grade":"grade3",
    "subject":"natural science",
    "topic":"physics",
    "category":"Materials",
    "skill":"Identify properties of an object",
    "lecture":"An object has different properties. A property of an object can tell you how it looks, feels, tastes, or smells. Properties can also tell you how an object will behave when something happens to it.",
    "solution":"Look at the object.\nThink about each property.\nSugar has a sweet taste. The cake batter is sweet.\nA bouncy object will bounce back from the floor if you drop it. The cake batter is not bouncy.",
    "split":"val",
    "path":"https:\/\/scienceqa-webdemo.s3.us-west-1.amazonaws.com\/extra\/1215\/image.png"
  },
  {
    "question":"Which of these states is farthest west?",
    "choices":[
      "Georgia",
      "Virginia",
      "Rhode Island",
      "Pennsylvania"
    ],
    "answer":0,
    "hint":null,
    "image":"image.png",
    "task":"closed-choice",
    "grade":"grade3",
    "subject":"social science",
    "topic":"geography",
    "category":"Geography",
    "skill":"Read a map: cardinal directions",
[truncated: 6,057,765 more chars]
