# Supplementary material
Source: ML conference proceedings conference paper supplement (https://proceedings.neurips.cc/paper_files/paper/2022/hash/11332b6b6cf4485b84afadb1352d3a9a-Abstract.html)
Supplement: Supplementary file 1 [file 11332b6b6cf4485b84afadb1352d3a9a-Supplemental-Conference.zip › ScienceQA_Supplementary_Material/explore/pages/visualizer.css]

/* same old constants and tag styling */
:root {
    --nav-font: Arial, Helvetica, sans-serif; 
    --nav-height: 6vh;
    --nav-gold: #FFD100;
    --nav-darkblue: #05004a;
    --body-font: #212529;
    --heading: #1859c2;
    --nav-color: #212529;
    --nav-color-light: #353c42;
}
html {
    overflow-x: hidden;
    font-family: var(--nav-font);
}
body {
    margin: 0;
    padding: 0;
    font-size: 16px;
    line-height: 125%;
    color: var(--body-font)
}
a {
    color: black;
    text-decoration: none;
    font-size: 18px;
}
p {
    line-height: 150%;
    font-size: 18px;
}
/* block: heading in the paragraph */
h1 {
    color: var(--heading);
}
hr {
    width: 75%;
    color: silver;
    opacity: 0.5;
    margin: 50px auto;
}
ul {
    margin: 0;
}
li {
    margin-top: 15px;
}

/* next/prev button styling */
input[type=button] {
    cursor: pointer;
    background: white;
    width: 5vw;
    height: 3vh;
    border-radius: 5px;
    font-size: 0.8em;
}

.row {
    display: flex;
    flex-direction: row;
    justify-content: space-between;
    align-items: flex-start;
    margin: 0;
    padding: 0;
    margin-top: var(--nav-height);
}

.optionsbtn {
    height: 50px;
    padding: 5px 10px;
    top: var(--nav-height);
    left: 0;
    position: fixed;
    z-index: 1;

    font-size: 20px;
    cursor: pointer;
    background-color: var(--nav-color);
    color: white;
    border: none;
}
.optionsbtn:hover {
    background-color: silver;
}


#option-panel  {
    position: sticky;
    z-index: 2;
    height: 250px;
    top: var(--nav-height);
    left: 0;
    background-color: silver;
    overflow-x: hidden;
    transition: 0.5s;
    height: calc(100vh - var(--nav-height) - 40px);
    display: flex;
    flex-direction: column;
    /* justify-content: space-around; */
    align-items: center;
    width: 20vw;
    padding-top: 40px;
}
#option-panel a {
    padding: 8px 8px 8px 32px;
    text-decoration: none;
    font-size: 25px;
    color: #818181;
    display: block;
    transition: 0.3s;
}  
#option-panel a:hover {
    color: #f1f1f1;
} 
#option-panel .closebtn {
    position: absolute;
    top: 10px;
    right: 10px;
    font-size: 36px;
}

#display {
    float: right;
    width: 60vw;
    transition: 0.5s;
    padding: 0px 10vw;
}
#content-body {
    /* height: 200vh; */
    width: 100%;
    display: flex;
    flex-direction: row;
    justify-content: space-between;
    align-items: flex-start;
}

.display-col {
    width: 48%;
}

.box {
    padding: 10px;
    margin: 0;
    background-color: white;
    border-radius: 5px;
    border: 1px solid rgba(0,0,0,0.4);
    /* box-shadow: 5px 5px 5px rgba(0,0,0,0.2); */
    overflow-y: auto;
    max-height: 100vh;
}

#title {
    margin: 50px 0;
}

.question-title {
    vertical-align: middle;
}
.question-txt {
    overflow-y: hidden;
    color: blue;
}
.hint-txt {
    margin-bottom: 2px;
}
.question-img {
    max-width: 100%;
    max-height: 400px;
    width: auto;
    height: auto;
    display: block;
    margin: 0 auto;
    margin-top: 20px;
}

.choices {
    display: flex;
    flex-direction: row;
    align-items: center;
}
.choices-vertical {
    display: grid;
    row-gap: 10px;
}

.choice-txt {
    border: 1px solid silver;
    /* text-align: center; */
    padding: 5px 10px;
    margin-right: 10px;
    width: fit-content;
}

.answer-txt {
    color: green;
    font-weight: bold;
}

.optbox {
    width: calc(90%);
    margin-bottom: 10px;
    transition: 0.5;
}

.opttitle {
    width: 90%;
    text-align: left;
}

.dd-label {
    margin: 0px 0;
    display: block;
}

#filter-submit {
    color: white;
    border-radius: 4px;
    text-shadow: 0 1px 1px rgba(0, 0, 0, 0.2);
}

.button-success {
    background-color: rgb(28, 184, 65);
}

/* navigation bar styling */
#nav {
    width: 96%;
    height: var(--nav-height);
    background-color: var(--nav-color);
    position: fixed;
    top: 0;
    z-index: 10;
    display: flex;
    justify-content: space-between;
    align-items: center;
    padding: 0 2vw;
    opacity: 1;
    /* border-bottom: 1px solid blue; */
}
.nav-button {
    margin-left: 20px;
    font-family: var(--nav-font);
    color: white;
}
.nav-button:hover {
    color: var(--nav-gold);
}
