# Supplementary material
Source: ML conference proceedings conference paper supplement (https://proceedings.neurips.cc/paper_files/paper/2022/hash/11332b6b6cf4485b84afadb1352d3a9a-Abstract.html)
Supplement: Supplementary file 1 [file 11332b6b6cf4485b84afadb1352d3a9a-Supplemental-Conference.zip › ScienceQA_Supplementary_Material/explore/visualizer.html]

ScienceQA


ScienceQA

☰

×

### Sample Filters

Refresh data!

# ScienceQA (Science Question Answering)
